# Supplementary material for: Spatially resolved whole transcriptome profiling in human and mouse tissue using Digital Spatial Profiling
Source: HighWire-hosted journal article supplement (doi:10.1101/gr.276206.121), 2022-09-13
Supplement: Supplemental_Table_1.xlsx [file Supplemental_Table_1.xlsx]

## Sheet: README
Supplemental Table 1. Probe information for all human and mouse WTA probes
Probe ID	Probe ID number
ProbeDisplayName	Probe name
TargetName	Gene symbol of target gene from HGNC (human) or MGI (mouse)
Symbol	Gene symbol of all transcripts with >= 95% homology to the probe
Accessions	Accession numbers of all transcripts with >= 95% homology to the probe
GenomeBuild	Genome build to which probes were designed
GenomicPosition	Genomic coordinates of all transcripts with >= 95% homology to the probe

## Sheet: human
Probe ID	ProbeDisplayName	TargetName	Symbol	Accessions	GenomeBuild	GenomicPosition
45880	VTA1_01	VTA1	VTA1	NM_016485.5,NM_001286371.1,NM_001286372.1	GRCh38.p13	chr6:142189462-142189511
50797	BPIFA3_01	BPIFA3	BPIFA3	XR_244132.3,XR_002958455.1,XR_002958456.1,NM_178466.5,NM_001042439.2	GRCh38.p13	chr20:33223812-33223861
41723	FSCN1_01	FSCN1	FSCN1	NM_003088.4	GRCh38.p13	chr7:5605772-5605814
44530	TSPAN16_01	TSPAN16	TSPAN16	XM_011527902.1,NM_012466.4,NM_001282509.2,XM_011527901.1,NR_104199.2,XM_024451450.1,NM_001282510.2	GRCh38.p13	chr19:11296283-11296332
42014	GPR65_01	GPR65	GPR65	NM_003608.4	GRCh38.p13	chr14:88011413-88011462
49659	CFAP53_01	CFAP53	CFAP53	NM_145020.5	GRCh38.p13	chr18:50262012-50262061
38408	ADCYAP1_01	ADCYAP1	ADCYAP1	NM_001117.5,NM_001099733.2,XM_005258081.4	GRCh38.p13	chr18:910639-910688
36055	RFX2_01	RFX2	RFX2	XM_017027107.1,NM_134433.3,XM_011528172.2,NM_000635.4	GRCh38.p13	chr19:5994686-5994735
36887	TTLL9_01	TTLL9	TTLL9	NR_148013.2,NR_160277.1,NR_148012.2,NR_148011.2,NM_001008409.4,NM_001367620.1,NR_160276.1,NR_148014.2,NR_148010.2,NR_134519.3	GRCh38.p13	chr20:31923015-31925019
50657	UHMK1_01	UHMK1	UHMK1	NM_175866.5,NM_144624.2,NM_001184763.1	GRCh38.p13	chr1:162500120-162500169
46501	TMEM63B_01	TMEM63B	TMEM63B	XM_005249215.4,XM_017011001.1,XM_005249211.3,XM_017010999.1,XM_017011002.1,XM_005249214.4,XM_024446482.1,XM_006715135.1,XM_005249217.1,XR_001743506.2,XM_017011000.1,NM_001318792.1,XM_005249213.4,NM_018426.3	GRCh38.p13	chr6:44136427-44138516
36610	OR4N2_01	OR4N2	OR4N2	NM_001004723.3	GRCh38.p13	chr14:19829542-19829591
43089	HIP1_01	HIP1	HIP1	NM_001243198.3,NM_005338.7,XM_011516116.2,XM_017012099.1,NM_001382444.1,NM_001382445.1	GRCh38.p13	chr7:75536222-75536271
45320	MINAR1_01	MINAR1	MINAR1	XM_011521393.3,XM_011521392.1,XM_017022027.1,XR_001751168.1,XM_011521396.2,XR_931777.1,NM_015206.3,XR_002957628.1,XR_001751167.1,XM_011521395.2	GRCh38.p13	chr15:79468255-79468304
37564	ATAD3C_01	ATAD3C	ATAD3C	NM_001039211.3	GRCh38.p13	chr1:1450411-1450445
48654	ADGRA2_01	ADGRA2	ADGRA2	XM_011544483.2,XM_011544481.2,NM_032777.10,XM_011544482.2	GRCh38.p13	chr8:37830895-37831432
12738	NUDT4B_01	NUDT4B	NUDT4,NUDT4P2,NUDT4B	NM_001301023.2,XM_011537795.2,NM_001301022.2,XM_011537794.2,NM_199040.4,NM_001301024.2,NM_001355407.1,NR_104005.1,XM_011537796.2,NM_019094.6	GRCh38.p13	chr1:146298567-146298605,chr12:93399231-93399269,chr1:148749350-148749388
48799	SURF4_01	SURF4	SURF4	NM_001280789.2,XM_011518944.2,NM_001280791.1,NM_033161.4,NM_001280790.1,XM_011518943.1,XM_011518945.3,XM_017015062.1,NM_001280793.1,NM_001280792.1,NM_001280788.1	GRCh38.p13	chr9:133361908-133361957
34463	ANGPTL4_01	ANGPTL4	ANGPTL4	XM_005272484.3,NM_139314.3,XM_005272485.3,NR_104213.2,NM_001039667.3	GRCh38.p13	chr19:8366030-8366064
34580	RPL31_01	RPL31	RPL31P11,RPL31	NM_000993.5,NR_002595.1,NM_001099693.1,NM_001098577.2	GRCh38.p13	chr2:101005969-101006007,chr1:161684930-161684968
50365	CLECL1_01	CLECL1	CLECL1	NM_001267701.1,NM_172004.3,NM_001253750.1,XM_017018885.1,XM_011520574.2	GRCh38.p13	chr12:9722709-9722758
36066	ACY1_01	ACY1	ABHD14A-ACY1,ACY1	NM_001198898.2,NM_001198895.2,NM_000666.3,NM_001316331.2,NM_001198896.2,NM_001198897.2	GRCh38.p13	chr3:51988557-51988768
50273	NLRP5_01	NLRP5	NLRP5	NM_153447.4	GRCh38.p13	chr19:56033665-56038029
51440	CTXN1_01	CTXN1	CTXN1	NM_206833.4	GRCh38.p13	chr19:7924731-7924765
36527	KRTAP5-2_01	KRTAP5-2	KRTAP5-2	NM_001004325.2	GRCh38.p13	chr11:1597490-1597533
40087	MEGF10_01	MEGF10	MEGF10	NM_001256545.2,XM_017009987.1,NM_032446.3,NM_001308121.1,NM_001308119.1,XM_011543694.1	GRCh38.p13	chr5:127340547-127340596
41973	SNN_01	SNN	SNN	XM_017023741.1,XM_017023742.1,NM_003498.6	GRCh38.p13	chr16:11676864-11676905
43229	LCP2_01	LCP2	LCP2	NM_005565.5	GRCh38.p13	chr5:170248629-170248678
51875	GRIP1_01	GRIP1	GRIP1	NM_001178074.2,XM_005268757.4,NM_001366723.1,NM_001366722.1,XM_017019098.1,NM_001379351.1,NM_001379347.1,XM_005268754.4,NM_001379346.1,XM_017019100.1,NM_021150.4,NM_001379349.1,NM_001379348.1,NM_001379345.1,NM_001366724.1	GRCh38.p13	chr12:66517959-66529862
50190	CCDC140_01	CCDC140	CCDC140	NR_161172.1	GRCh38.p13	chr2:222303793-222303832
45158	ADNP2_01	ADNP2	ADNP2	XM_005266656.4,XM_011525883.2,NM_014913.4	GRCh38.p13	chr18:80136034-80136083
49608	EFHB_01	EFHB	EFHB	XM_011533382.2,XM_011533383.3,NM_001330688.2,XR_940383.2,XM_005264889.2,NM_144715.4,XM_017005745.2,XM_011533385.2,XM_017005742.2,XR_001740031.2,XM_017005743.2,XM_017005744.2	GRCh38.p13	chr3:19905656-19905705
42278	BCL2A1_01	BCL2A1	BCL2A1	NM_001114735.2,NM_004049.4	GRCh38.p13	chr15:79971083-79971132
45968	STX18_01	STX18	STX18	NR_144414.2,NM_001346282.2,NM_016930.4,NM_001346281.2,NM_001346300.1	GRCh38.p13	chr4:4457437-4457486
49083	TUBA3D_01	TUBA3D	TUBA3D
45349	CUX2_01	CUX2	CUX2	XM_017019081.1,XM_011538069.2,XM_011538063.3,XM_011538070.2,NM_001370598.1,NM_015267.4,XM_017019080.1	GRCh38.p13	chr12:111349072-111349116
42448	KIF1A_01	KIF1A	KIF1A	NM_001379639.1,NM_001379638.1,NM_001379640.1,NM_001379641.1,NM_001330289.2,NM_001320705.2,NM_001379635.1,NM_001379642.1,NM_001379634.1,NM_001379646.1,NM_001379637.1,NM_001379636.1,NM_001379645.1,NM_001379648.1,NM_004321.8,NM_001379649.1,NM_001244008.2,NM_001379631.1,NM_001379653.1,NM_001330290.2,NM_001379651.1,NM_001379650.1,NM_001379633.1,NM_001379632.1	GRCh38.p13	chr2:240740341-240741280
43469	MT1H_01	MT1H	MT1H	NM_005951.2	GRCh38.p13	chr16:56670997-56671046
44618	SLC16A8_01	SLC16A8	SLC16A8	NM_013356.3,XM_017028685.1	GRCh38.p13	chr22:38078335-38078369
41307	TRPM1_01	TRPM1	TRPM1	NM_002420.6,NM_001252024.2,NM_001252020.1,NM_001252030.2	GRCh38.p13	chr15:31070104-31070141
46971	AHRR_01	AHRR	AHRR,PDCD6-AHRR	NM_001377236.1,NM_001377239.1,NR_165159.2,NR_165163.2	GRCh38.p13	chr5:435641-435690
48725	TMEM141_01	TMEM141	TMEM141	NM_032928.4	GRCh38.p13	chr9:136791761-136791979
40754	PRMT1_01	PRMT1	PRMT1	NM_001207042.3,XM_017026736.1,NR_033397.5,NM_198318.5,XM_017026734.1,XM_005258842.1,XM_017026735.1,NM_001536.6	GRCh38.p13	chr19:49682043-49682212
35928	PON1_01	PON1	PON1	NM_000446.7	GRCh38.p13	chr7:95298825-95298874
38197	ZNF578_01	ZNF578	ZNF578	NM_001366182.1,NM_001099694.2	GRCh38.p13	chr19:52515414-52515463
40287	NUP153_01	NUP153	NUP153	NM_005124.4,XM_005249507.3,NM_001278209.1,XM_006715291.4,XM_006715290.3,XM_011515028.3,NM_001278210.1,XM_017011594.2	GRCh38.p13	chr6:17647901-17649207
36554	OR10G7_01	OR10G7	OR10G7,OR10G8	NM_001004463.2,NM_001004464.2
49320	OTULIN_01	OTULIN	OTULIN	NM_138348.6,XM_011514152.2,XM_011514154.2,XM_011514151.2,XM_017010015.1	GRCh38.p13	chr5:14681477-14681526
35424	COL4A4_01	COL4A4	COL4A4	XM_011510561.2,XR_001738606.1,XM_005246282.3,XR_001738607.1,XM_011510560.2,XM_005246281.3,XR_001738604.1,XM_011510567.2,XM_011510566.2,XM_017003300.1,XR_001738602.1,XR_001738603.1,XM_011510558.2,XM_017003297.1,XR_922837.2,XM_011510559.2,XM_011510570.2,XM_011510557.2,XM_006712246.3,XM_011510572.3,XM_011510565.2,NM_000092.5,XM_011510568.2,XM_017003296.1,XM_011510569.2,XM_017003298.1,XM_011510562.2,…	GRCh38.p13	chr2:227059491-227059525
38564	ANKRD33_01	ANKRD33	ANKRD33	NM_182608.4,NM_001130015.2,NM_001304459.2,NM_001304460.2	GRCh38.p13	chr12:51891439-51891488
36797	ERBB3_01	ERBB3	ERBB3	NM_001005915.1,NM_001982.4	GRCh38.p13	chr12:56085038-56085082
46916	EQTN_01	EQTN	EQTN	NM_001161585.1,XM_011517920.2,NM_020641.3	GRCh38.p13	chr9:27286335-27289693
48180	ZNF696_01	ZNF696	ZNF696	NM_030895.3	GRCh38.p13	chr8:143297997-143298046
43960	MCM5_01	MCM5	MCM5	XM_006724242.4,NM_006739.4	GRCh38.p13	chr22:35416716-35416760
42356	RAB5A_01	RAB5A	RAB5A	NM_004162.5,XR_001740225.2,NM_001292048.1	GRCh38.p13	chr3:19950922-19950968
44026	COPS5_01	COPS5	COPS5	NM_006837.3	GRCh38.p13	chr8:67059416-67061873
50568	PSMD12_01	PSMD12	PSMD12	NM_002816.5,XM_024450843.1,XM_024450842.1,NM_174871.4,NM_001316341.2,XR_001752571.2	GRCh38.p13	chr17:67347412-67347461
37400	ELP6_01	ELP6	ELP6	XM_024453608.1,XM_017006669.1,XR_001740186.1,XM_005265241.4,NM_001031703.3,NM_001363957.1	GRCh38.p13	chr3:47496079-47496128
44199	SF3A2_01	SF3A2	SF3A2	NM_007165.5	GRCh38.p13	chr19:2246915-2246956
37871	TRAPPC6B_01	TRAPPC6B	TRAPPC6B	NM_001079537.2,NM_177452.4,XM_011536409.2	GRCh38.p13	chr14:39148342-39148391
48194	CAB39L_01	CAB39L	CAB39L	NM_001287338.1,XM_011535254.3,XM_017020785.2,XM_011535255.3,NM_030925.4,XM_017020788.2,XM_011535256.3,NM_001287339.1,NM_001079670.3,XM_017020787.2,NM_001287337.2,XM_017020786.2	GRCh38.p13	chr13:49310807-49310856
42990	CDKN3_01	CDKN3	CDKN3	NM_001130851.1,NM_005192.4,NM_001330173.1,XM_024449458.1	GRCh38.p13	chr14:54415929-54417894
40420	CYB561D2_01	CYB561D2	CYB561D2	NR_111912.2,NM_007022.5,NM_001291284.2	GRCh38.p13	chr3:50351499-50351544
43885	KIF1C_01	KIF1C	KIF1C	XM_005256424.2,NM_006612.6	GRCh38.p13	chr17:5025458-5025507
45550	FAM184B_01	FAM184B	FAM184B	NM_015688.2	GRCh38.p13	chr4:17781291-17781336
12538	MIF_01	MIF	MIF	NM_002415.2	GRCh38.p13	chr22:23894853-23894887
49649	ADAM32_01	ADAM32	ADAM32	NM_145004.7,XM_006716298.3,XM_017013185.2,XM_024447092.1,XM_024447093.1,XM_017013184.2,XM_006716299.2,NM_001313994.1,XM_017013188.1,XM_011544433.2,XM_017013187.1,XM_017013183.2,XM_017013186.2,XM_011544434.2	GRCh38.p13	chr8:39234056-39246105
42049	BCAS1_01	BCAS1	BCAS1	XM_011529091.3,XM_005260589.3,XM_005260594.3,XM_005260591.3,NM_003657.3,XM_005260590.3,NM_001366297.1,NM_001366296.1,XM_011529090.3,XM_005260595.3,NM_001323347.1,NM_001316361.2,XM_017028111.2,NM_001366298.1,NM_001366295.1	GRCh38.p13	chr20:53944660-53944709
49623	PROKR2_01	PROKR2	PROKR2	XM_017027646.1,NM_144773.4	GRCh38.p13	chr20:5314190-5314239
12540	MINDY4B_01	MINDY4B	MINDY4B	NM_001351281.2	GRCh38.p13	chr3:150882941-150882975
35147	CCDC50_01	CCDC50	CCDC50	NM_178335.3,XM_011512460.1,NM_174908.4	GRCh38.p13	chr3:191329679-191329713
41036	FGF7_01	FGF7	FGF7	NM_002009.4	GRCh38.p13	chr15:49423418-49424058
37005	C6orf58_01	C6orf58	C6orf58	NM_001010905.3	GRCh38.p13	chr6:127577174-127577223
43072	GRK5_01	GRK5	GRK5	XM_005269707.2,NM_005308.3,XM_005269708.1	GRCh38.p13	chr10:119453155-119453204
48619	CBX2_01	CBX2	CBX2	NM_032647.3,XM_011525383.2,XM_011525382.1,NM_005189.3	GRCh38.p13	chr17:79778389-79778423
37082	SLC45A2_01	SLC45A2	SLC45A2	NM_016180.5,NM_001012509.4,NM_001297417.3	GRCh38.p13	chr5:33982345-33982394
37101	LRRC73_01	LRRC73	LRRC73	NM_001271882.2,NM_001012974.2	GRCh38.p13	chr6:43507181-43507230
37847	EXOC3L4_01	EXOC3L4	EXOC3L4	XM_011537327.2,XM_011537331.1,NM_001077594.1,XM_011537328.2,XM_011537324.2,XM_011537330.2,XM_011537334.1,XM_011537329.2,XM_011537325.2,XM_011537333.2,XM_011537332.2,XM_011537323.3	GRCh38.p13	chr14:103110333-103110382
40453	AMOTL1_01	AMOTL1	AMOTL1	XM_006718772.3,XM_011542626.2,XM_011542628.2,NM_001301007.2,XM_005273801.4,NM_130847.3,XM_005273798.4	GRCh38.p13	chr11:94830072-94830121
50669	PRR15_01	PRR15	PRR15	XM_011515198.1,NM_001329996.2,NM_175887.3,XM_011515199.1,NM_001329997.1	GRCh38.p13	chr7:29567119-29567168
43380	DDX39A_01	DDX39A	DDX39A	XM_011527621.3,XM_024451310.1,XM_024451311.1,NR_046366.2,XM_006722606.4,NM_005804.4,XM_024451312.1,XM_011527620.1	GRCh38.p13	chr19:14408936-14409060
12447	LIX1L_01	LIX1L	LIX1L	NM_153713.3,XM_017000316.1	GRCh38.p13	chr1:145942797-145942831
47574	LRRC19_01	LRRC19	LRRC19	NM_022901.3	GRCh38.p13	chr9:26997908-26997957
50186	ZNF75A_01	ZNF75A	ZNF75A	NM_001324085.1,XM_017023645.2,XM_017023644.2,NM_001324041.1,XM_011522647.2,NM_001352498.1,XM_017023643.2,NM_153028.3,XM_011522646.3,NM_001352497.1,NM_001302109.2,NM_001352495.1	GRCh38.p13	chr16:3311894-3311929
51000	TMEM61_01	TMEM61	TMEM61	XM_011540911.2,NM_182532.3,XM_005270586.4,XM_011540912.2	GRCh38.p13	chr1:54992089-54992126
43124	ROCK1_01	ROCK1	ROCK1	NM_005406.3	GRCh38.p13	chr18:20970408-20970457
40869	C5AR1_01	C5AR1	C5AR1	NM_001736.4,XM_005259190.5	GRCh38.p13	chr19:47321001-47321050
36919	SPDYC_01	SPDYC	SPDYC	XM_017017709.1,XM_017017707.1,XM_017017708.1,XM_017017706.1,XM_017017710.1,XM_017017705.1,NM_001008778.2	GRCh38.p13	chr11:65172542-65172576
49870	ZNF585B_01	ZNF585B	ZNF585B	NM_152279.4	GRCh38.p13	chr19:37183241-37183290
45598	UBR5_01	UBR5	UBR5	XR_001745540.2,NM_001282873.1,XM_017013533.2,XM_005250962.5,XM_024447178.1,XM_024447179.1,XM_011517105.3,NM_015902.6,XM_017013534.2,XM_011517104.3,XM_011517106.3,XR_001745541.2,XR_001745539.2	GRCh38.p13	chr8:102296907-102296956
52027	PLPPR3_01	PLPPR3	PLPPR3	NM_001270366.2,XM_011528317.3,NM_024888.2	GRCh38.p13	chr19:815744-815778
38236	MBOAT4_01	MBOAT4	MBOAT4	NM_001100916.2,XM_017013726.1	GRCh38.p13	chr8:30132213-30132262
50127	RICTOR_01	RICTOR	RICTOR	NM_001285439.2,XM_017009313.1,XM_017009312.1,XM_011514005.2,XM_017009315.2,NM_001285440.2,XM_017009314.2,XM_017009311.1,XM_011514006.3,NM_152756.5,XM_006714463.3	GRCh38.p13	chr5:38952200-38952249
36135	CSF3R_01	CSF3R	CSF3R	NM_172313.3,NM_156039.3,XM_011540749.1,XM_011540748.3,NM_000760.4,XM_005270493.1,XM_011540750.1,XM_017000370.1	GRCh38.p13	chr1:36469163-36469199
51140	SCN5A_01	SCN5A	SCN5A	NM_001160161.2,NM_000335.5,NM_001160160.2,NM_198056.3,XM_011533991.2,NM_001099405.2,XM_017007017.1,NM_001099404.2,NM_001354701.2	GRCh38.p13	chr3:38548126-38548175
46712	F7_01	F7	F7	XM_011537475.2,NM_000131.4,NM_001267554.1,XM_011537476.2,NR_051961.2,NM_019616.4,XM_006719963.3,XM_011537474.2	GRCh38.p13	chr13:113119972-113120013
38203	PRAMEF20_01	PRAMEF20	PRAMEF20	NM_001099852.2	GRCh38.p13	chr1:13418526-13418575
36758	OR5B17_01	OR5B17	OR5B17	NM_001005489.2	GRCh38.p13	chr11:58358798-58358847
48511	PINK1_01	PINK1	PINK1	NM_032409.3	GRCh38.p13	chr1:20650462-20650511
35082	PAN2_01	PAN2	PAN2	NM_001166279.2,NM_001127460.3,NM_014871.5	GRCh38.p13	chr12:56324328-56324363
37182	CCDC189_01	CCDC189	CCDC189	XM_017023852.2,XM_017023857.2,XR_001752022.2,XM_024450489.1,XM_017023853.2,XR_001752023.2,XM_017023856.2,XM_017023858.2,XM_017023862.2,XM_017023854.2,XM_017023859.2,NM_001014979.3,XR_950868.2,XM_017023855.2,XM_011545976.2,XR_950869.2,XM_011545978.2,XM_017023861.2,NM_001195620.1,XR_950866.2,XR_001752021.2	GRCh38.p13	chr16:30761680-30761717
36900	MXI1_01	MXI1	MXI1	NM_005962.5,NM_130439.3,NM_001008541.1	GRCh38.p13	chr10:110284934-110284983
38889	FBRSL1_01	FBRSL1	FBRSL1	XM_011534812.2,XM_005266175.4,XM_011534808.3,XM_011534809.3,NM_001382739.1,NM_001382740.1,XM_011534806.3,XM_011534807.3,XM_011534803.3,XM_005266177.4,XM_011534810.3,NM_001367871.1,XM_005266171.4,NM_001142641.2,XM_011534805.3,XR_002957364.1,XM_005266173.4,XM_005266176.4,XM_011534804.3	GRCh38.p13	chr12:132567512-132569945
44245	PRR4_01	PRR4	PRR4,PRH1-PRR4	NM_001098538.3,NR_037918.2,NM_007244.3	GRCh38.p13	chr12:10845947-10847090
36597	OR4C6_01	OR4C6	OR4C6	NM_001004704.2
38243	CCDC160_01	CCDC160	CCDC160	NM_001101357.2,NM_001353453.1,XM_005262410.4	GRCh38.p13	chrX:134245532-134245581
49008	UGT2B28_01	UGT2B28	UGT2B28	XM_017008303.1,NM_001207004.2,NM_053039.2	GRCh38.p13	chr4:69280997-69281046
40112	SEC14L3_01	SEC14L3	SEC14L3	NM_001376914.1,XM_011530128.2,NM_174975.5,NM_001257379.2,NM_001257378.2,NM_001257382.2	GRCh38.p13	chr22:30464901-30466378
44412	ZNF212_01	ZNF212	ZNF212	NM_012256.4	GRCh38.p13	chr7:149254970-149255019
37751	CAPSL_01	CAPSL	CAPSL	XM_006714444.3,NM_144647.3,XM_006714445.3,NM_001042625.2	GRCh38.p13	chr5:35910002-35910051
44247	CYP4F8_01	CYP4F8	CYP4F8	NM_007253.4,XM_024451341.1,XM_024451340.1	GRCh38.p13	chr19:15618095-15618144
36590	OR2T5_01	OR2T5	OR2T5,OR2T29	NM_001004694.3,NM_001004697.2	GRCh38.p13	chr1:248488642-248488691
36988	TSPO2_01	TSPO2	TSPO2	NM_001159726.1,XM_011514397.2,NM_001010873.3,XM_011514396.2	GRCh38.p13	chr6:41043119-41043566
38904	SPATC1L_01	SPATC1L	SPATC1L	XM_011529756.2,XM_005261188.5,NM_001142854.2,XM_017028480.2,NM_032261.5	GRCh38.p13	chr21:46161528-46161577
13090	RNASEH2C_01	RNASEH2C	RNASEH2C	NM_032193.4	GRCh38.p13	chr11:65720121-65720155
41595	RARS1_01	RARS1	RARS1	NM_002887.4	GRCh38.p13	chr5:168500668-168500717
36043	SLC11A2_01	SLC11A2	SLC11A2	NM_001174129.1,NM_000617.3,XM_017019356.2,XR_001748720.1,NM_001174125.2,NR_166669.1,NR_166668.1,XR_944555.1,NM_001379455.1,NM_001379446.1,NM_001379447.1,XR_429104.1,NM_001174126.2,NM_001174130.2,NR_166670.1,NM_001174127.2,NR_033422.2,NR_033421.2,XM_011538404.3,NM_001379448.1,XM_011538405.3,NM_001174128.2	GRCh38.p13	chr12:51000347-51000396
50060	BBS12_01	BBS12	BBS12	XM_017007831.1,NM_001178007.1,NM_152618.3,XM_011531680.2	GRCh38.p13	chr4:122744505-122744554
47139	SNTB1_01	SNTB1	SNTB1	NM_021021.4	GRCh38.p13	chr8:120538710-120538759
43944	NUDT3_01	NUDT3	NUDT3	NM_006703.4	GRCh38.p13	chr6:34392280-34392318
44076	SUMO3_01	SUMO3	SUMO3	NM_006936.3,NM_001286416.1	GRCh38.p13	chr21:44806824-44806873
39075	YPEL3_01	YPEL3	YPEL3	NM_031477.5,NM_001145524.2,XR_950857.1	GRCh38.p13	chr16:30092413-30092462
51051	MACC1_01	MACC1	MACC1	NM_182762.4	GRCh38.p13	chr7:20159848-20159897
37905	ECPAS_01	ECPAS	ECPAS	NM_001364930.1,XM_005251853.3,XM_011518422.3,NM_001364931.1,XM_017014557.1,NM_001363756.1,NM_001364929.1	GRCh38.p13	chr9:111433351-111436967
46717	LTB4R2_01	LTB4R2	LTB4R2	NM_001164692.2,NM_019839.5	GRCh38.p13	chr14:24311850-24311884
36759	OR6C74_01	OR6C74	OR6C74	NM_001005490.1,XM_017019126.1	GRCh38.p13	chr12:55247746-55247795
44697	C19orf53_01	C19orf53	C19orf53	NM_014047.3	GRCh38.p13	chr19:13774556-13774674
49847	OXER1_01	OXER1	OXER1	NM_148962.4	GRCh38.p13	chr2:42763621-42763656
46509	ALLC_01	ALLC	ALLC	NM_018436.4,XM_017004497.1,XM_017004498.1,XM_017004496.2,XM_011510369.2,XM_011510370.2,XM_017004495.1	GRCh38.p13	chr2:3701578-3701612
48876	PGAP3_01	PGAP3	PGAP3	NM_001291732.1,NM_001291728.1,NM_001291726.1,XM_011525480.2,XM_011525481.2,NM_001291730.1,NM_033419.5,XR_002958086.1,NM_001291733.1	GRCh38.p13	chr17:39671259-39671308
34621	TSSC4_01	TSSC4	TSSC4	NM_001297659.2,NM_005706.4,NM_001297660.2,NM_001297658.2,XM_011519830.3,XM_006718118.2,NM_001297661.2	GRCh38.p13	chr11:2402865-2402899
51473	OR10A4_01	OR10A4	OR10A4	NM_207186.2	GRCh38.p13	chr11:6877281-6877330
49688	NSMCE1_01	NSMCE1	NSMCE1	XM_011545762.1,NM_145080.4,XM_017023042.1,XM_006721023.4,XM_017023041.1,XR_002957792.1,XM_017023040.1	GRCh38.p13	chr16:27225002-27225051
35483	PALM2AKAP2_01	PALM2AKAP2	PALM2AKAP2	NM_001004065.4,NM_001136562.3,NM_147150.3,NM_007203.5,NM_001198656.1	GRCh38.p13	chr9:110137236-110137270
37354	SFMBT2_01	SFMBT2	SFMBT2	XM_005252551.2,XM_011519611.1,NM_001029880.2,XM_006717490.2,NM_001018039.1,XM_017016466.1	GRCh38.p13	chr10:7162737-7162786
45126	KBTBD11_01	KBTBD11	KBTBD11	XM_017014115.2,XM_017014114.2,XM_011534771.2,NM_014867.3,XM_011534772.2,XM_017014117.2,XM_017014116.1	GRCh38.p13	chr8:2000585-2000631
37327	RAB12_01	RAB12	RAB12	XM_006722300.3,XR_001753166.1,XR_001753165.1,NM_001025300.2	GRCh38.p13	chr18:8609945-8624978
47231	OVOL2_01	OVOL2	OVOL2	NM_001303461.1,NM_021220.4,NM_001303462.1	GRCh38.p13	chr20:18041562-18041599
45680	MRPS16_01	MRPS16	MRPS16	NM_016065.4	GRCh38.p13	chr10:73250672-73250716
49218	MEN1_01	MEN1	MEN1	NM_130799.2,NM_001370260.1,NM_001370262.1,NM_130804.2,XM_011545040.1,NM_001370251.1,XM_017017765.1,NM_130803.2,NM_001370261.1,NM_130802.2,XM_017017768.1,XM_017017767.2,NM_001370259.2,NM_000244.3,XM_011545041.2,NM_130801.2,NM_130800.2,XM_017017766.1,NM_001370263.1	GRCh38.p13	chr11:64804100-64804148
36885	C14orf180_01	C14orf180	C14orf180	XM_005267638.3,NM_001286399.2,NM_001008404.3,NM_001286400.2,XM_011536764.2	GRCh38.p13	chr14:104581602-104586449,chr14:104581625-104586449,chr14:104580003-104586449
39307	IYD_01	IYD	IYD	XM_006715478.3,XM_006715479.3,NM_001164695.2,NM_001318495.2,NM_001164694.2,NM_203395.3,NR_134655.2	GRCh38.p13	chr6:150394099-150394148
43770	AKAP3_01	AKAP3	AKAP3	XM_024448797.1,NM_001278309.2,XM_011520910.2,NM_006422.3,XM_011520908.1,XM_011520909.2	GRCh38.p13	chr12:4628686-4628735
41159	IL6ST_01	IL6ST	IL6ST	NM_001364278.2,NM_175767.3,NM_002184.4,NM_001364277.2,NR_157112.2,NM_001364276.2,NR_120480.2,NM_001364275.2,NM_001364279.2,NM_001190981.2	GRCh38.p13	chr5:55941539-55941588
37413	ASB9_01	ASB9	ASB9	NM_001168531.1,XM_017029283.1,NM_001031739.3,XM_024452341.1,XM_017029286.2,NM_024087.3,XM_005274446.1,XM_011545458.1,XM_017029285.1,NM_001168530.2,XM_017029284.1,XM_011545460.1	GRCh38.p13	chrX:15244518-15244567
46435	EXOC2_01	EXOC2	EXOC2	XM_017011024.1,NR_073064.1,XM_017011025.1,XM_017011018.1,XM_017011021.1,XM_017011019.1,NM_018303.6,XM_017011020.1,XM_017011026.1,XM_017011022.1,XM_017011023.1	GRCh38.p13	chr6:562829-564065
43834	IFT88_01	IFT88	IFT88	NR_148463.2,NM_001353577.2,NR_148462.2,NR_148464.2,NM_001353565.2,NM_001353574.2,NM_001353572.2,NM_001353569.2,NM_001353570.2,NM_001353568.2,NM_001353571.2,XM_024449414.1,XM_017020757.1,NM_175605.5,XM_017020773.1,XR_001749683.1,NR_134653.2,NM_001353573.2,XR_001749686.1,XR_002957474.1,XM_017020775.1,XM_017020763.1,XM_017020759.1,XM_006719870.3,XM_017020762.1,NM_006531.5,XM_017020768.1,XM_024449412…	GRCh38.p13	chr13:20625799-20625848
40225	CYLC1_01	CYLC1	CYLC1	XM_005262086.4,NM_001271680.1,NM_021118.3	GRCh38.p13	chrX:83886632-83886681
46540	LGR4_01	LGR4	LGR4	NM_018490.5,NM_001346432.1	GRCh38.p13	chr11:27368137-27368186
34510	MS4A4A_01	MS4A4A	MS4A4A	NM_001243266.2,NM_148975.3,NM_024021.4,XM_017017909.2	GRCh38.p13	chr11:60297257-60297306
49262	EMID1_01	EMID1	EMID1	XM_011529874.2,XM_011529873.3,XM_011529872.3,XM_011529868.3,XM_011529869.3,XM_005261329.3,XR_937808.3,NM_133455.4,XR_937810.3,NM_001267895.2,XM_017028589.1,XM_005261328.3,XM_011529871.3,XM_011529870.3,XR_937809.3	GRCh38.p13	chr22:29214942-29214977
43440	SMAD3_01	SMAD3	SMAD3	NM_001145102.1,XM_011521560.1,NM_001145103.1,NM_005902.4,NM_001145104.1,XM_011521559.3	GRCh38.p13	chr15:67193231-67193280
36477	OR10A3_01	OR10A3	OR10A3	NM_001003745.2
49963	ARHGAP42_01	ARHGAP42	ARHGAP42	NM_001367945.1,XM_011542615.2,XM_017017237.1,XM_017017238.1,NM_152432.4,XM_011542616.2	GRCh38.p13	chr11:100990589-100990638
43410	ZMPSTE24_01	ZMPSTE24	ZMPSTE24	NM_005857.5,XR_001736906.2	GRCh38.p13	chr1:40268441-40268490
38959	NHSL1_01	NHSL1	NHSL1	XM_011535971.2,XM_011535966.3,XM_011535968.3,XM_011535967.3,XM_011535970.2,XM_011535969.2,XM_011535976.1,XM_011535973.3,XM_011535974.3,XM_005267062.5,NM_020464.2,XM_017011089.1,XM_011535972.2,NM_001144060.2,XM_017011086.2,XM_017011088.1,XM_017011087.1,XM_024446497.1	GRCh38.p13	chr6:138433121-138433170
49405	PKHD1_01	PKHD1	PKHD1	XM_017010946.2,XM_011514684.3,XM_017010947.2,XM_017010948.2,XM_017010949.2,XM_011514688.2,NM_170724.3,XM_017010950.1,XM_011514685.1,XM_017010944.2,XM_011514682.3,XM_011514683.3,XM_011514691.3,XM_011514690.3,XM_011514680.3,XR_001743469.1,NM_138694.4,XM_017010952.1,XM_011514686.2,XM_011514687.1,XM_017010945.2,XM_017010951.1	GRCh38.p13	chr6:51903659-51903708
34549	VAV1_01	VAV1	VAV1	NM_001258206.2,XM_005259642.1,NM_005428.4,NM_001258207.2	GRCh38.p13	chr19:6850689-6850729
43836	CLCA2_01	CLCA2	CLCA2	XM_011542448.3,NM_006536.7	GRCh38.p13	chr1:86424232-86424279
42700	SCAF11_01	SCAF11	SCAF11	XM_024449275.1,XM_011538985.1,XM_011538984.2,XM_017020218.1,XM_017020219.1,XM_017020217.1,NM_004719.3,XM_024449274.1,XM_005269230.2	GRCh38.p13	chr12:45923088-45923137
48865	TNKS1BP1_01	TNKS1BP1	TNKS1BP1	XM_006718725.3,NM_033396.3,XM_011545325.3	GRCh38.p13	chr11:57309329-57309377
35014	IRX5_01	IRX5	IRX5	NM_005853.6,XM_011522809.1,NM_001252197.1	GRCh38.p13	chr16:54933790-54933824
51522	RGS9BP_01	RGS9BP	RGS9BP	NM_207391.3	GRCh38.p13	chr19:32677811-32677860
46563	ZNF395_01	ZNF395	ZNF395	NM_018660.3	GRCh38.p13	chr8:28346337-28346386
34909	PIP4K2B_01	PIP4K2B	PIP4K2B	XM_011525327.2,XM_017025199.1,XM_011525330.2,XM_011525326.3,NM_003559.4,XM_017025197.1	GRCh38.p13	chr17:38779395-38779431
47903	TM4SF20_01	TM4SF20	TM4SF20	XM_011511876.2,NM_024795.4	GRCh38.p13	chr2:227363018-227363067
48846	CDC14A_01	CDC14A	CDC14A	XM_024450506.1,XM_024450503.1,NM_001319212.1,NM_033312.2,XR_002957888.1,XM_017002646.1,XM_017002647.1,XM_024450504.1,NM_001319211.1,XM_024450505.1,NM_003672.4,XM_011542340.2,NM_001319210.2,XR_002957887.1,XM_011542341.3,XM_005271296.3,NM_033313.2,XM_005271294.3,XM_011542345.3	GRCh38.p13	chr1:100468080-100484326
50942	FFAR4_01	FFAR4	FFAR4	NM_181745.4,NM_001195755.2	GRCh38.p13	chr10:93587420-93587469
48011	TOE1_01	TOE1	TOE1	XR_002959287.1,NM_025077.4,XR_246230.4,XM_011540569.3,XR_946532.3,XM_024452837.1,XM_005270412.4,XR_426587.4,XM_005270413.5,XR_001736951.2	GRCh38.p13	chr1:45341109-45341158
34469	PAOX_01	PAOX	PAOX	NM_152911.4,NR_109763.2,NM_207127.3,NR_109765.2,NM_207128.3,NR_109766.2,NR_109764.2	GRCh38.p13	chr10:133381585-133381620
46052	BMP2K_01	BMP2K	BMP2K	XM_017008382.1,XM_011532102.1,NM_198892.1,XM_017008381.1,XM_005263117.1,NM_017593.4	GRCh38.p13	chr4:78865629-78865678
47624	MRPS34_01	MRPS34	MRPS34	NM_023936.2,NM_001300900.2	GRCh38.p13	chr16:1772129-1772178
37427	RPS29_01	RPS29	RPS29	NM_001030001.4,NM_001032.5	GRCh38.p13	chr14:49586045-49586329
37379	ARNTL_01	ARNTL	ARNTL	NM_001030273.2,XM_017017744.1,NM_001030272.2,NM_001351809.1,XM_011520107.3,XM_017017741.1,XM_024448522.1,NR_147785.1,NM_001351805.1,NM_001351814.1,NM_001297722.1,NR_147787.1,XM_017017748.1,NM_001351824.1,NR_147786.1,NM_001351804.1,XM_006718234.1,NM_001351813.1,NM_001351812.1,NM_001297724.1,NR_147788.1,NM_001351806.1,XM_011520109.1,NM_001351811.1,NM_001351810.1,XM_011520111.1,XR_001747876.2,NM_001…	GRCh38.p13	chr11:13365578-13366699
40501	PTPRN2_01	PTPRN2	PTPRN2	XM_017012476.1,NM_001308268.1,XM_011516446.1,XM_011516448.3,NM_130842.4,XM_017012475.1,XM_011516447.2,NM_130843.4,XM_011516449.2,NM_002847.5,NM_001308267.2	GRCh38.p13	chr7:158205218-158205258
46353	EVA1B_01	EVA1B	EVA1B	NR_130899.2,NM_018166.2,NM_001304762.2	GRCh38.p13	chr1:36322239-36322277
35001	RPL22L1_01	RPL22L1	RPL22L1	NM_001099645.2,NR_135259.2,NM_001320451.2	GRCh38.p13	chr3:170866418-170866458
13705	ZNF347_01	ZNF347	ZNF347	NM_032584.3,NM_001172675.2,NM_001172674.1	GRCh38.p13	chr19:53148703-53148737
38025	THOC2_01	THOC2	THOC2	XR_002958785.1,XM_017029665.1,XM_017029664.1,XM_017029679.1,XR_002958786.1,XM_017029667.1,XM_017029668.1,NM_001081550.2,XR_002958787.1,XR_002958794.1,XR_002958788.1,XR_002958789.1,XR_001755715.1,XR_002958796.1,XR_002958793.1,XR_002958792.1,XR_002958795.1,XR_002958791.1,XR_001755714.1,XM_017029676.1,XR_002958790.1,XM_017029663.1,XM_017029675.1,XR_002958797.1,XM_017029662.1,XM_017029672.1	GRCh38.p13	chrX:123624175-123624573
42390	MED14_01	MED14	MED14	NM_004229.4,XM_011544000.3,XM_017029962.2,XM_005272701.3	GRCh38.p13	chrX:40712192-40712241
36038	CD59_01	CD59	CD59	NM_001127226.1,NM_001127223.1,NM_203331.2,NM_001127225.1,NM_000611.6,NM_203330.2,NM_001127227.1,NM_203329.2	GRCh38.p13	chr11:33709848-33709897
35700	FANCA_01	FANCA	FANCA	NM_001018112.3,NM_000135.4,NM_001286167.3,NM_001351830.2	GRCh38.p13	chr16:89811032-89814529
48995	APOA5_01	APOA5	APOA5	NM_052968.5,NM_001166598.2,NM_001371904.1	GRCh38.p13	chr11:116789734-116789777
46167	DUSP23_01	DUSP23	DUSP23	NM_001319659.2,NM_017823.5,NM_001319658.2	GRCh38.p13	chr1:159782327-159782369
37629	MESP2_01	MESP2	MESP2	NM_001039958.2	GRCh38.p13	chr15:89778349-89778398
36175	GAD1_01	GAD1	GAD1	NM_000817.3,XM_017003757.2,XM_005246444.3,XM_017003758.2,XM_011510922.1,NM_013445.3,XM_017003756.1	GRCh38.p13	chr2:170829533-170829582
42283	CA8_01	CA8	CA8	NM_004056.6,NM_001321837.2,NM_001321838.2,NM_001321839.2,XM_017013818.1,XM_011517587.2,NR_135821.2,XM_011517588.3	GRCh38.p13	chr8:60265985-60266034
45723	COMMD10_01	COMMD10	COMMD10	NM_016144.4,NR_146219.1,NR_146218.2,NR_146220.2,NM_001308080.1	GRCh38.p13	chr5:116134111-116134160
40953	CPA2_01	CPA2	CPA2	NM_001869.3	GRCh38.p13	chr7:130269779-130270717
13271	SLC6A14_01	SLC6A14	SLC6A14	NM_007231.5	GRCh38.p13	chrX:116437829-116437863
40536	TAF1B_01	TAF1B	TAF1B	XM_024453209.1,XM_011510411.1,XM_011510410.2,NM_001318977.1,NM_005680.3,NM_001318976.1	GRCh38.p13	chr2:9919605-9919654
46448	MBD5_01	MBD5	MBD5	XM_011511470.2,XR_002959318.1,NM_001378120.1,XR_002959319.1,NM_018328.5,XM_024452988.1,XM_024452989.1,XM_011511472.2,XM_024452990.1	GRCh38.p13	chr2:148470424-148483121
47140	CFHR3_01	CFHR3	CFHR3	XR_001736937.1,XR_426757.2,NM_001166624.1,XR_001736938.1,XR_002958987.1,NM_021023.6,XR_241062.3	GRCh38.p13	chr1:196779836-196779885
45062	MTSS1_01	MTSS1	MTSS1	XM_006716702.2,NM_001363294.1,XM_006716706.2,NM_001363295.1,NM_014751.6,XM_006716701.2,XM_006716705.2,XM_006716704.2,NM_001363296.1,NM_001363297.1,XM_006716700.2,XM_017014087.2,XM_011517407.1,XM_017014086.2,XM_017014092.2,NM_001363302.1,XM_017014089.2,XM_017014090.2,XM_017014088.2,XM_017014091.1,XM_005251111.2,NM_001282974.1,NM_001282971.1,XM_011517403.1,XM_005251113.2,NM_001363298.1,XM_024447351…	GRCh38.p13	chr8:124552969-124553018
48979	ALPK2_01	ALPK2	ALPK2	NM_052947.4	GRCh38.p13	chr18:58515061-58516936
39136	PODNL1_01	PODNL1	PODNL1	XM_017027313.1,NM_001146254.1,NM_024825.4,NM_001146255.1	GRCh38.p13	chr19:13932329-13932378
41104	H3-3A_01	H3-3A	H3-3A,H3P6	NM_001379045.1,NM_002107.7,NM_001379046.1,NM_001379047.1,NM_001379043.1,NR_002315.1	GRCh38.p13	chr2:174720033-174720082,chr1:226064477-226065702
52074	TFB1M_01	TFB1M	TFB1M	XR_942460.2,XR_001743453.1,XM_011535872.2,NM_001350501.2,XM_011535873.2,NM_016020.4,XM_017010917.1,NM_001350502.2,XM_011535870.1,NR_146725.2,XM_011535871.2	GRCh38.p13	chr6:155285213-155285252
35144	SYCP2_01	SYCP2	SYCP2	XM_017027589.1,NM_014258.4,XM_011528493.2,XM_017027591.1,XM_011528488.2,XM_017027587.1,XM_017027590.2,XM_011528490.3,XM_017027586.1,XM_011528489.2,XM_011528487.3,XM_017027592.2,XM_017027588.1	GRCh38.p13	chr20:59915493-59915529
44549	DNAJC15_01	DNAJC15	DNAJC15	NM_013238.3	GRCh38.p13	chr13:43078641-43085769
38191	LRRN3_01	LRRN3	LRRN3	NM_001099660.1,NM_018334.5,NM_001099658.2	GRCh38.p13	chr7:111124667-111124716
38976	CD209_01	CD209	CD209	NM_001144894.2,NR_026692.2,NM_001144897.2,NM_001144893.2,NM_001144896.2,NM_001144899.2,NM_021155.4,NM_001144895.2	GRCh38.p13	chr19:7742788-7742837
43639	PLCL1_01	PLCL1	PLCL1	XM_005246643.4,XM_017004339.2,NM_006226.4,XM_005246644.4,XM_011511351.2,XM_017004340.2	GRCh38.p13	chr2:198084205-198084254
46585	ADARB2_01	ADARB2	ADARB2	NM_018702.4	GRCh38.p13	chr10:1183033-1183082
35109	PIGW_01	PIGW	PIGW	NM_001346755.1,NM_178517.4,NM_001346754.2	GRCh38.p13	chr17:36537105-36537151
41823	TK1_01	TK1	TK1	NM_001363848.1,NM_001346663.2,NM_003258.5	GRCh38.p13	chr17:78174206-78174255
46727	GSK3A_01	GSK3A	GSK3A	XR_001753673.1,NM_019884.3	GRCh38.p13	chr19:42239974-42240014
41820	TIMP2_01	TIMP2	TIMP2	NM_003255.5	GRCh38.p13	chr17:78854986-78855026
51284	PHLDB3_01	PHLDB3	PHLDB3	XM_005259169.4,XM_011527236.3,NM_198850.3,XM_005259170.4	GRCh38.p13	chr19:43478092-43478132
46293	HEATR1_01	HEATR1	HEATR1	NM_018072.6	GRCh38.p13	chr1:236596892-236596941
43384	GDF11_01	GDF11	GDF11	XM_006719194.3,NM_005811.5	GRCh38.p13	chr12:55748842-55748891
44326	RERE_01	RERE	RERE	NM_001042681.2,NM_001042682.2,NM_012102.4	GRCh38.p13	chr1:8353144-8353193
35818	PHKA2_01	PHKA2	PHKA2	XM_011545537.3,XM_005274548.5,XR_950461.3,XR_002958777.1,XM_006724498.4,NM_000292.3,XM_017029580.2,XM_006724496.4,XR_001755697.2,XR_001755698.2,XM_011545538.3,XM_005274550.5	GRCh38.p13	chrX:18926522-18926571
47402	PRSS22_01	PRSS22	PRSS22	XM_005255473.3,NM_022119.4	GRCh38.p13	chr16:2855650-2855688
42754	KIF3B_01	KIF3B	KIF3B	XR_001754435.2,NM_004798.4	GRCh38.p13	chr20:32333746-32333794
46695	PPP1R37_01	PPP1R37	PPP1R37	NM_019121.2,XR_001753668.1,XM_006723159.3	GRCh38.p13	chr19:45140562-45140596
11885	ENPP1_01	ENPP1	ENPP1	NM_006208.3	GRCh38.p13	chr6:131868074-131868108
35285	HOOK2_01	HOOK2	HOOK2	NM_001100176.2,NM_013312.3	GRCh38.p13	chr19:12772209-12772243
13175	SCRT1_01	SCRT1	SCRT1	NM_031309.6,XM_024447291.1	GRCh38.p13	chr8:144333252-144333287
36390	PPARA_01	PPARA	PPARA	XM_005261656.3,NM_001362872.2,XM_011530245.2,XM_006724270.3,XM_011530242.2,NM_005036.6,XM_024452252.1,XM_011530243.2,XM_024452253.1,XR_001755253.1,XR_937870.2,NM_001001928.3,XM_011530244.2,XM_011530240.2,XM_011530241.2,XR_937869.2,NM_001362873.1,XM_011530239.2,XM_017028839.1	GRCh38.p13	chr22:46198518-46198567
47600	SIGLEC1_01	SIGLEC1	SIGLEC1	NM_001367089.1,NM_023068.4	GRCh38.p13	chr20:3688475-3688522
46182	PARP16_01	PARP16	PARP16	XM_017022388.2,NM_017851.6,NM_001316943.2,XM_011521742.3,XM_017022386.2,XM_006720592.3,NM_001316944.2,XM_017022389.2,XM_017022387.2	GRCh38.p13	chr15:65259073-65259122
11643	CHST2_01	CHST2	CHST2	NM_004267.5	GRCh38.p13	chr3:143121686-143121720
48962	RNF157_01	RNF157	RNF157	XM_017024117.2,XM_011524273.3,XR_001752422.1,NM_052916.3,XM_005257007.4,XM_017024120.2,NM_001330501.2	GRCh38.p13	chr17:76165525-76166489
40979	DCN_01	DCN	DCN	NM_133505.3,NM_133506.3,NM_001920.5,NM_133503.3,NM_133507.3,NM_133504.3	GRCh38.p13	chr12:91178441-91178490
45802	CRBN_01	CRBN	CRBN	NM_016302.4,XM_011533791.3,XR_940448.3,XM_005265202.4,XM_024453551.1,XM_011533794.2,XM_011533793.2,NM_001173482.1	GRCh38.p13	chr3:3150600-3150649
45529	TRPC4AP_01	TRPC4AP	TRPC4AP	XR_001754238.2,XR_936517.3,XR_002958469.1,NM_199368.1,XR_002958468.1,XM_017027799.2,XR_001754236.2,XM_024451868.1,NM_015638.3,XM_017027801.1,XM_017027800.2,XR_001754235.2,XR_002958470.1,XR_001754237.2	GRCh38.p13	chr20:35035283-35044528
47421	CENPK_01	CENPK	CENPK	XR_001742177.1,XM_024446144.1,XM_017009692.1,XM_017009693.1,XM_024446147.1,XM_024446146.1,XM_011543540.2,NM_001349367.2,XM_017009701.1,XM_011543539.2,NM_001349368.2,XM_017009696.2,XM_011543535.2,XM_017009697.1,NM_001349369.2,NM_001267038.2,XM_011543536.2,NM_022145.5,XM_011543537.2,XM_011543538.2,XM_017009694.1,XR_948282.3,XM_017009695.1,XM_017009690.1,XM_017009691.1	GRCh38.p13	chr5:65542842-65551606
47576	RASAL3_01	RASAL3	RASAL3	XM_011528185.1,XM_024451656.1,XR_936203.2,XR_936202.1,XM_011528187.1,NM_001348027.2,NM_022904.3,XR_001753737.1,XM_011528186.1,NM_001348028.2	GRCh38.p13	chr19:15461090-15461220
41090	GRN_01	GRN	GRN	XM_005257253.1,NM_002087.4,XM_024450730.1	GRCh38.p13	chr17:44350256-44350305
49462	ADAMTS17_01	ADAMTS17	ADAMTS17	XM_017021981.1,XM_017021984.1,XR_001751118.1,NM_139057.4,XM_017021977.1,XM_017021973.2,XM_017021976.1,XM_017021975.1,XM_017021974.1,XR_001751120.1,XM_011521312.2,XM_005254872.3,XR_001751119.1	GRCh38.p13	chr15:100262426-100281264
11560	CCDC85B_01	CCDC85B	CCDC85B	NM_006848.3	GRCh38.p13	chr11:65890959-65890993
13171	SCNM1_01	SCNM1	SCNM1	NM_024041.4,NM_001204856.2,NR_037937.2	GRCh38.p13	chr1:151166166-151166200
47120	CRYGC_01	CRYGC	CRYGC	XM_011510662.1,NM_020989.4	GRCh38.p13	chr2:208128390-208128427
47048	RELCH_01	RELCH	RELCH	XM_011526117.3,NM_001346235.2,NM_001346234.2,XM_011526111.2,XM_011526114.2,XR_001753252.2,XM_011526112.2,XM_017025883.2,NM_001346233.2,NR_144407.2,NR_144403.2,NR_144406.2,NM_001346231.2,NM_001346230.2,NR_144405.2,NR_144408.2,NR_144404.2,NR_144409.2,XR_001753251.2,NM_020854.4,NM_001346229.2,XR_001753249.2,XR_935240.2,NR_144412.2,XR_935241.3,NR_144410.2,XR_935239.3	GRCh38.p13	chr18:62258562-62258611
38533	NUDT22_01	NUDT22	NUDT22	XM_024448716.1,NM_001128613.2,NM_001128612.2,NM_032344.4,NM_001271831.1,XM_024448715.1	GRCh38.p13	chr11:64229569-64229881
42293	CLK1_01	CLK1	CLK1	NR_027855.2,NM_004071.4,NR_027856.2,NM_001162407.1	GRCh38.p13	chr2:200857873-200858010
46031	INO80_01	INO80	INO80	XM_011521685.3,XR_001751322.2,XM_011521686.3,NR_104038.1,NM_017553.3	GRCh38.p13	chr15:41021092-41027611
39603	MTRNR2L1_01	MTRNR2L1	MTRNR2L1	NM_001190452.2
41545	PSMC5_01	PSMC5	PSMC5	NM_001199163.1,NM_002805.6,XM_024450841.1,XM_024450840.1,XR_934508.2	GRCh38.p13	chr17:63830386-63830435
50832	TRIML1_01	TRIML1	TRIML1	XM_011531919.2,XM_006714207.3,NM_178556.5,XM_024454028.1,XR_001741216.1	GRCh38.p13	chr4:188147087-188147136
36642	OR51Q1_01	OR51Q1	OR51Q1	NM_001004757.2	GRCh38.p13	chr11:5422937-5422986
40083	DNAAF10_01	DNAAF10	DNAAF10	NM_138458.4,NM_001256476.2,NR_046234.2	GRCh38.p13	chr2:68134775-68137323
47916	CCDC134_01	CCDC134	CCDC134	NM_024821.5,NM_001382346.1	GRCh38.p13	chr22:41813291-41813340
45199	LIMCH1_01	LIMCH1	LIMCH1	NM_001330672.2,NM_001330791.2,NM_001330788.2,XM_005248057.1,NM_001330790.2,NM_001330789.2,NM_001330793.1,NM_001112720.3,XM_011513646.1,NM_001330786.2,XM_005248061.1,NM_001330787.2,XM_005248060.1,NM_001112718.4,NM_001330784.2,XM_017007903.1,NM_001330674.1,NM_014988.5,XM_011513651.2,XM_017007900.1,XM_017007898.1,XM_017007896.1,XM_017007897.1,XM_011513653.1,XM_011513645.1,XM_024453937.1,XM_011513644…	GRCh38.p13	chr4:41698446-41698495
40597	ZNF141_01	ZNF141	ZNF141	NM_003441.4,NM_001348277.2,NM_001348280.2,NM_001348278.2,NM_001348279.2	GRCh38.p13	chr4:337874-337908
50295	CPNE8_01	CPNE8	CPNE8	XR_944501.3,NM_153634.3,XM_017018852.1,XR_245896.4,XM_011537951.3	GRCh38.p13	chr12:38693764-38693813
42158	SIGLEC5_01	SIGLEC5	SIGLEC5	NM_001384708.1,XM_017027419.1,NM_001384709.1,NM_003830.4	GRCh38.p13	chr19:51627215-51627471
44633	SERTAD1_01	SERTAD1	SERTAD1	NM_013376.4	GRCh38.p13	chr19:40422750-40422784
51222	PAQR9_01	PAQR9	PAQR9	NM_001375300.1,NM_198504.4,NM_001375301.1	GRCh38.p13	chr3:142962201-142962250
12527	MGP_01	MGP	MGP	NM_000900.5,NM_001190839.3	GRCh38.p13	chr12:14882214-14882249
38295	ASH2L_01	ASH2L	ASH2L	NM_004674.5,XM_005273682.1,XM_006716413.3,XM_006716412.1,NM_001261832.1,NM_001105214.2,NM_001282272.1,XM_005273683.1	GRCh38.p13	chr8:38128796-38128845
51223	ATP13A5_01	ATP13A5	ATP13A5	XM_017006304.1,NM_198505.4,XM_011512770.2,XM_017006305.1	GRCh38.p13	chr3:193315006-193315051
44252	LYPLA2_01	LYPLA2	LYPLA2,LYPLA2P2	XM_017000165.1,XM_005245728.5,NM_007260.3,NR_033250.1,XM_024452797.1,XM_024452796.1	GRCh38.p13	chr19:7879558-7879592,chr1:23794486-23794520
44547	ATXN10_01	ATXN10	ATXN10	NM_013236.4,NM_001167621.1	GRCh38.p13	chr22:45729511-45729560
50702	TAS2R43_01	TAS2R43	TAS2R43,TAS2R31	NM_176885.2,NM_176884.2	GRCh38.p13	chr12:11030500-11030549,chr12:11091394-11091443
47451	DPEP2_01	DPEP2	DPEP2	NR_136706.2,XM_005256090.5,XR_933389.3,XM_024450376.1,XM_024450374.1,XR_933390.3,XM_017023543.1,XM_024450373.1,XM_017023545.1,XM_024450372.1,XM_011523271.3,XM_011523268.3,XR_933391.3,XM_011523273.3,XM_017023542.2,XM_011523272.3,XM_011523266.1,XM_017023544.1,NM_001369657.1,XM_011523274.3,XM_017023547.1,NM_022355.4,NM_001324159.1	GRCh38.p13	chr16:67987641-67987680
50487	UMODL1_01	UMODL1	UMODL1	XM_011529797.1,NM_001199527.2,NM_001199528.3,XM_017028507.1,NM_173568.3,NM_001004416.2	GRCh38.p13	chr21:42098945-42098994
11361	ANKRD18B_01	ANKRD18B	ANKRD18B	NM_001353432.2	GRCh38.p13	chr9:33572354-33573217
45734	TLX2_01	TLX2	TLX2	NM_016170.5	GRCh38.p13	chr2:74517051-74517100
50668	FAM181B_01	FAM181B	FAM181B	NM_175885.4	GRCh38.p13	chr11:82732372-82732411
41686	SKI_01	SKI	SKI	XM_017002128.1,NM_003036.4,XM_005244776.4,XM_005244775.3	GRCh38.p13	chr1:2307892-2307941
49486	DAGLB_01	DAGLB	DAGLB	NM_139179.4,NM_001142936.1	GRCh38.p13	chr7:6446055-6446101
43432	KATNB1_01	KATNB1	KATNB1	NM_005886.3	GRCh38.p13	chr16:57744451-57744492
42615	PSPH_01	PSPH	PSPH	NM_001370506.1,XR_002956470.1,NM_001370519.1,NM_001370513.1,NM_001370512.1,NM_001370521.1,NM_001370511.1,NM_001370510.1,NM_001370520.1,NM_001370507.1,NM_001370517.1,NM_001370516.1,NM_001370508.1,NM_001370509.1,XM_017012467.2,XM_006715761.2,NM_001370504.1,NM_004577.4,NM_001370503.1,NM_001370515.1,NM_001370514.1,NM_001370518.1,NM_001370522.1,XM_017012469.2,NM_001370505.1,XM_017012468.2	GRCh38.p13	chr7:56011210-56011259
43651	PPP1R2_01	PPP1R2	PPP1R2	NM_001291504.2,NM_006241.8,NM_001291505.2,NM_001316325.2,XM_006713682.3,NR_133014.2	GRCh38.p13	chr3:195543156-195543205
41622	RNASE1_01	RNASE1	RNASE1	NM_198234.3,NM_002933.5,NM_198235.3,NM_198232.3	GRCh38.p13	chr14:20801429-20801478
46698	RNF20_01	RNF20	RNF20	XM_011518862.1,NM_019592.7	GRCh38.p13	chr9:101540493-101540542
45412	C22orf31_01	C22orf31	C22orf31	XM_011530096.3,XM_017028741.1,XM_005261491.3,NM_015370.1	GRCh38.p13	chr22:29058872-29058906
39673	BFSP1_01	BFSP1	BFSP1	XM_017028005.2,NM_001195.5,NM_001278608.1,NM_001278606.2,NM_001278607.2,NM_001161705.2	GRCh38.p13	chr20:17494120-17494169
49536	COMTD1_01	COMTD1	COMTD1	NM_144589.4,XM_024447791.1	GRCh38.p13	chr10:75233998-75234047
42982	CA7_01	CA7	CA7	NM_005182.3,NM_001014435.2,XM_011523312.1,NM_001365337.2	GRCh38.p13	chr16:66847128-66847167
13230	SIX1_01	SIX1	SIX1	NM_005982.4,XM_017021602.2	GRCh38.p13	chr14:60648838-60648873
51590	PMS2_01	PMS2	PMS2	NM_001322007.1,NM_001322011.2,NM_001322003.2,NM_001322008.2,NM_001322015.2,NM_001322010.2,NM_001322004.2,NM_001322009.2,NM_001322014.2,NM_001322005.2,NM_001322013.2,NM_000535.7,NR_136154.1,NM_001322012.2,XM_024446800.1,NM_001322006.2	GRCh38.p13	chr7:5995577-5995626
43710	TUBGCP3_01	TUBGCP3	TUBGCP3	NM_006322.6,XR_001749455.2,XM_005268293.2,XM_017020323.2,NM_001286278.2,NM_001286279.1,NM_001286277.2	GRCh38.p13	chr13:112547717-112548121
48832	ATP23_01	ATP23	ATP23	NM_001320410.2,XM_011538976.2,NM_001320409.2,NM_033276.4,XM_017020206.1,NM_001320408.2	GRCh38.p13	chr12:57951849-57953607
40374	TMEM179_01	TMEM179	TMEM179	XM_011536745.2,XR_943433.1,XM_024449578.1,XM_011536750.2,XR_002957551.1,NM_001286389.2,NM_001286390.1	GRCh38.p13	chr14:104597029-104597078
43273	SSX1_01	SSX1	SSX7,SSX8P,SSX1	NM_001278691.2,NR_027250.2,XM_017029430.1,XM_017029431.1,NM_005635.4,NM_173358.2	GRCh38.p13	chrX:48257810-48257859,chrX:52625566-52625615,chrX:52652871-52652920
49321	SAMD1_01	SAMD1	SAMD1	NM_138352.3	GRCh38.p13	chr19:14088484-14088528
46415	TMEM39A_01	TMEM39A	TMEM39A	XR_001740198.2,XR_001740197.2,XM_006713687.2,XM_017006788.2,NM_018266.3,NR_073506.2,XM_005247578.2,XM_011512958.3	GRCh38.p13	chr3:119437838-119437887
48240	FCRL4_01	FCRL4	FCRL4	NM_031282.3,XM_011510034.1	GRCh38.p13	chr1:157575053-157575102
50881	MRPL55_01	MRPL55	MRPL55	XR_002959480.1,NM_181464.2,NM_181441.2,XM_024453282.1,XR_002959481.1,NM_181455.2,XM_005273063.5,XM_005273062.3,NM_181462.2,XR_002959482.1,NM_181465.2,NM_181454.2,XM_011544095.3,NM_181463.3,XM_005273061.5,NM_181456.2,NM_001321284.1,XM_005273059.4	GRCh38.p13	chr1:228106756-228106793
37416	C12orf40_01	C12orf40	C12orf40	NM_001031748.4,NM_001319247.2,XM_005268806.3,NR_135051.2	GRCh38.p13	chr12:39626259-39626295
47270	PLEKHA2_01	PLEKHA2	PLEKHA2	XM_011544607.3,XM_011544606.2,XM_011544605.3,XM_017013719.2,NM_021623.2,XM_024447227.1,XM_017013720.2	GRCh38.p13	chr8:38969823-38969871
13174	SCO2_01	SCO2	SCO2	NM_001169111.1,NM_001169109.1,NM_001169110.1,NM_005138.3	GRCh38.p13	chr22:50523721-50523756
43775	SIVA1_01	SIVA1	SIVA1	NM_021709.3,NM_006427.4,XM_011536360.2	GRCh38.p13	chr14:104759430-104759467
47302	SIGIRR_01	SIGIRR	SIGIRR	NM_001135053.2,XM_005253045.1,XM_005253044.3,XM_017018099.2,XR_001747934.2,XM_017018100.2,NM_001135054.2,XM_005253046.1,NM_021805.3,XR_001747933.2,XM_005253048.4	GRCh38.p13	chr11:405858-405892
49902	SPATA2L_01	SPATA2L	SPATA2L	XM_005256279.5,NM_152339.4	GRCh38.p13	chr16:89696597-89696640
12172	H2BC6_01	H2BC6	H2BC6	NM_003523.3	GRCh38.p13	chr6:26184176-26184211
49241	SHANK2_01	SHANK2	SHANK2	XM_017017387.1,XM_017017389.1,NM_133266.5,XM_017017388.1,NM_012309.5,NM_001379226.1,XM_017017390.1,NR_110766.2	GRCh38.p13	chr11:70470381-70470430
44163	RPL10A_01	RPL10A	RPL10A	XM_017010900.1,NM_007104.5	GRCh38.p13	chr6:35470245-35470294
36538	CLEC2D_01	CLEC2D	CLEC2D	NM_001004419.5,NR_036693.3,NM_013269.6,NM_001197317.3,NM_001197318.3,NM_001197319.3	GRCh38.p13	chr12:9698760-9698809
44493	PHLDA3_01	PHLDA3	PHLDA3	NM_012396.5,NR_073080.1	GRCh38.p13	chr1:201468555-201468589
39301	FAM170B_01	FAM170B	FAM170B	NM_001164484.2	GRCh38.p13	chr10:49132158-49132192
12412	KRTAP21-1_01	KRTAP21-1	KRTAP21-1	NM_181619.2	GRCh38.p13	chr21:30755232-30755268
38601	C14orf93_01	C14orf93	C14orf93	XM_017021572.2,XM_024449685.1,XM_017021576.1,XM_024449687.1,NM_021944.4,XM_011537059.1,XM_006720231.1,NM_001130708.3,XM_017021575.2,XM_011537060.3,XM_011537062.2,XM_005267971.1,NM_001130706.3,NM_001282968.2,XM_017021570.2,NM_001282969.1,XM_006720232.2,XM_017021574.2,XM_005267972.2,NM_001282970.2,XM_017021573.1	GRCh38.p13	chr14:22989829-22990098
40452	EIF3K_01	EIF3K	EIF3K	NM_013234.4,NM_001300992.2,NM_001308393.2	GRCh38.p13	chr19:38624179-38626058
34686	CEMIP_01	CEMIP	CEMIP	NM_001293298.2,NM_001293304.2,NM_018689.3,XM_024450001.1	GRCh38.p13	chr15:80941862-80941896
35951	APRT_01	APRT	APRT	NM_001030018.2,NM_000485.3	GRCh38.p13	chr16:88809564-88809604
37293	C1orf68_01	C1orf68	C1orf68	NM_001024679.3	GRCh38.p13	chr1:152719608-152719650
41598	RBBP7_01	RBBP7	RBBP7	NM_002893.4,NM_001198719.2	GRCh38.p13	chrX:16853803-16857603
45147	RNF44_01	RNF44	RNF44	XM_005265840.2,XM_006714831.2,XM_006714832.2,XM_005265841.4,XR_941091.2,XM_024446002.1,XM_005265845.4,NM_014901.5,XM_011534466.3,XM_005265842.5,XM_005265843.2,XM_005265844.3,XM_011534467.2	GRCh38.p13	chr5:176528177-176528226
46842	PNPLA2_01	PNPLA2	PNPLA2	XM_006718265.3,NM_020376.4,XM_024448618.1,XM_017018028.1,XM_006718266.3	GRCh38.p13	chr11:822519-822556
39351	MTUS1_01	MTUS1	MTUS1	NM_001363060.2,NM_001166393.1,NM_001363058.1,NM_001001925.2,NR_156437.1,NM_020749.4,NM_001001924.2,NM_001330470.1,NM_001363061.1,NM_001363062.1,XM_011544595.3,NM_001363057.2,XM_005273581.3,XM_017013699.1,XM_005273578.3,NM_001001931.2,XM_024447213.1,XR_001745567.2,NM_001363059.1,XM_017013698.2	GRCh38.p13	chr8:17655937-17655986
45673	MRPL48_01	MRPL48	MRPL48	NR_134659.2,NM_001318500.2,NR_134658.2,XM_017017919.1,NR_134661.2,NM_016055.6,NM_001318498.2,NR_134660.2,NM_001318499.2	GRCh38.p13	chr11:73864397-73864446
48115	BHLHB9_01	BHLHB9	BHLHB9,ARMCX5-GPRASP2	NM_001350269.2,NM_001142528.2,NM_001350268.2,NM_001142525.2,NM_001142529.1,NM_001142524.2,NM_001142530.1,NM_030639.3,NM_001350270.1,NM_001142527.2,NM_001142526.2	GRCh38.p13	chrX:102749546-102749595
43656	PRB2_01	PRB2	PRB2	NM_006248.4	GRCh38.p13	chr12:11391558-11391607
49841	PIGQ_01	PIGQ	PIGQ	NM_148920.3,NM_004204.5	GRCh38.p13	chr16:578865-578899
36785	GBA_01	GBA	GBA	NM_001005742.3,NM_001171812.2,NM_001171811.2,NM_001005741.3,NM_000157.4	GRCh38.p13	chr1:155235730-155235779
50844	ARL5B_01	ARL5B	ARL5B	NM_178815.5,XM_005252400.1,XM_005252401.4	GRCh38.p13	chr10:18677189-18677238
38790	GRAMD1A_01	GRAMD1A	GRAMD1A	XM_017027034.2,XM_011527149.2,XM_011527154.2,XM_017027035.1,XM_011527155.1,NM_001320036.2,XM_024451622.1,NM_020895.5,XM_024451623.1,XM_011527156.2,NM_001320035.2,NM_001136199.3,XM_011527153.1,NM_001320034.2	GRCh38.p13	chr19:35021997-35023241
38902	C17orf49_01	C17orf49	RNASEK-C17orf49,C17orf49	NM_001142798.3,NM_001142799.3,NR_037717.1,NM_174893.4	GRCh38.p13	chr17:7016935-7016975
35377	MARCHF3_01	MARCHF3	MARCHF3	XM_011543130.1,XM_011543131.3,XM_011543129.1,NM_178450.5,XM_011543128.2,XM_011543132.1,XM_017009014.1,XM_017009015.1	GRCh38.p13	chr5:126918068-126918102
40349	SENP7_01	SENP7	SENP7	XM_017006928.2,XM_005247662.5,XM_017006925.1,XM_011513041.3,XM_017006924.1,NM_001282803.2,XM_011513045.3,XM_011513042.3,XM_011513039.3,NM_001282802.2,NM_020654.5,XM_017006929.2,NM_001077203.3,XR_001740218.2,XM_017006927.1,NM_001282801.2,XM_017006926.1,XM_011513038.3,NM_001282804.1,XM_011513040.3	GRCh38.p13	chr3:101459007-101493876,chr3:101459007-101493873
42051	AGPS_01	AGPS	AGPS	XR_001739007.2,XM_011512041.2,NM_003659.4,XM_011512043.2,XM_011512042.1	GRCh38.p13	chr2:177538112-177538161
49653	YPEL4_01	YPEL4	YPEL4	NM_145008.3,NM_001363487.1	GRCh38.p13	chr11:57645584-57645633
44745	ORMDL2_01	ORMDL2	ORMDL2	NM_014182.5	GRCh38.p13	chr12:55820423-55820472
42987	CBL_01	CBL	CBL	NM_005188.4	GRCh38.p13	chr11:119304423-119304457
47458	TFB2M_01	TFB2M	TFB2M	XM_017002055.1,NM_022366.3,XM_011544248.2	GRCh38.p13	chr1:246566111-246566148
39057	TEF_01	TEF	TEF	NM_003216.4,NM_001145398.2	GRCh38.p13	chr22:41397514-41397563
50859	SRARP_01	SRARP	SRARP	NM_178840.4	GRCh38.p13	chr1:16006539-16006586
40138	LRRC4C_01	LRRC4C	LRRC4C	XM_011520239.3,XM_011520241.3,XM_011520240.3,NM_001258419.2,XM_017018073.2,NR_047673.1,XM_017018070.2,XM_017018074.2,XM_017018071.2,XM_017018075.2,NR_047674.1,XM_017018072.2,XM_017018076.2,XM_017018077.2,XM_017018078.2,XM_017018079.2,XM_011520243.3,XM_024448626.1,XM_011520244.3,XM_024448627.1,NM_020929.2,XM_011520238.3,XM_011520242.3,XM_024448628.1	GRCh38.p13	chr11:40114964-40115013
38372	ENTPD6_01	ENTPD6	ENTPD6	NM_001322383.1,NM_001322382.1,NM_001322378.1,NM_001114089.3,NM_001322379.1,XM_017028131.2,XM_011529396.1,XM_011529397.1,XM_017028129.1,XM_017028132.2,NM_001247.5,NM_001322391.1,XM_017028133.2,NM_001322389.1,NM_001322388.1,NM_001322385.1,XM_017028130.1,NM_001322384.1,NM_001322396.1,XM_017028134.1,NM_001322397.1,XM_006723665.2,NM_001322387.1,XR_001754437.1,NM_001322394.1,NM_001322393.1,NM_001322395…	GRCh38.p13	chr20:25214883-25214932
40402	E4F1_01	E4F1	E4F1	XM_017023011.1,XR_001751853.1,XM_005255156.1,XM_005255155.1,XR_002957787.1,NM_001288778.1,XM_006720858.1,NM_004424.5,XR_429636.3,XR_243266.4,XM_011522403.1,NM_001288776.1,XM_017023010.1,XM_011522402.1	GRCh38.p13	chr16:2233108-2233144
48980	ARHGAP33_01	ARHGAP33	ARHGAP33	XM_011526418.1,XM_011526416.1,XM_011526417.1,XM_017026238.1,NM_001366178.1,XM_011526421.2,XR_935731.2,NM_001172630.2,XM_011526420.1,XM_006722999.2,NM_052948.4	GRCh38.p13	chr19:35777900-35778306
49967	C12orf66_01	C12orf66	C12orf66	NM_001300941.2,NM_152440.5,NM_001300940.1	GRCh38.p13	chr12:64194641-64215709
41898	VBP1_01	VBP1	VBP1	NM_003372.7,NM_001303545.1,NM_001303543.1,NM_001303544.1	GRCh38.p13	chrX:155228450-155236245
39865	TNFRSF19_01	TNFRSF19	TNFRSF19	NM_001204458.3,XM_017020651.1,NM_001204459.1,XM_005266445.3,NM_018647.5,XM_005266446.2,NM_001354985.2,NM_148957.4,XM_011535146.1	GRCh38.p13	chr13:23616012-23626711
35397	KIFC3_01	KIFC3	KIFC3	NM_005550.4,XM_024450265.1,NM_001130100.2,XM_017023223.1,XM_017023222.1,XM_017023221.1,XM_017023220.1,XM_011523079.1,XM_017023224.1,XM_024450267.1,XM_017023227.1,XM_017023226.1,XM_011523077.1,XM_011523076.1,NM_001318714.1,XM_005255937.1,XM_011523078.1,XM_011523075.1,NM_001318713.1,XM_017023225.1,XM_017023219.1,NM_001318712.2,NM_001318715.2,XM_006721188.1,NM_001318711.2,NR_134678.1,XM_024450269.1,…	GRCh38.p13	chr16:57761119-57761154
46161	RAB20_01	RAB20	RAB20	NM_017817.3	GRCh38.p13	chr13:110523729-110523766
42400	TRIP10_01	TRIP10	TRIP10	NM_004240.4,XM_005259683.2,XM_006722940.1,NM_001288962.2,NR_110231.2,NM_001288963.2	GRCh38.p13	chr19:6742988-6743029
49631	ARHGAP36_01	ARHGAP36	ARHGAP36	NM_144967.4,NM_001282607.2,NM_001330651.1,XM_011531280.1	GRCh38.p13	chrX:131088829-131088870
41181	ITIH4_01	ITIH4	ITIH4	NM_001166449.1,NM_002218.5	GRCh38.p13	chr3:52820706-52820755
42647	WNT11_01	WNT11	WNT11	NM_004626.3,XR_002957190.1,XM_011545240.2,XM_024448678.1,XM_011545239.2,XM_011545238.1,XM_005274231.1	GRCh38.p13	chr11:76187204-76191566
13576	UACA_01	UACA	UACA	NM_001008224.3,XM_017022394.2,XM_011521754.3,XM_017022395.1,NM_018003.4,XM_005254529.4,XM_011521753.2,XM_011521752.3	GRCh38.p13	chr15:70664675-70664709
47652	TMEM106C_01	TMEM106C	TMEM106C	NM_001143843.1,XM_024449182.1,NM_001143842.2,XM_024449183.1,NM_024056.3,NM_001143841.1	GRCh38.p13	chr12:47966696-47967220
40128	TP53I11_01	TP53I11	TP53I11	NM_006034.5,NM_001318386.1,NM_001318387.2,XM_011520478.2,NM_001318384.2,NM_001318385.1,XM_024448777.1,NR_134612.2,NM_001318388.2,XM_011520475.2,XM_005253227.4,NM_001258320.2,XM_017018580.2,XM_017018581.1,NM_001258323.3,XM_011520476.2,NM_001258322.1,XM_011520477.2,NM_001318389.2,NM_001318390.2,NM_001258324.1,NM_001258321.1	GRCh38.p13	chr11:44935012-44935604
42183	HESX1_01	HESX1	HESX1	NM_001376061.1,NM_001376058.1,NM_001376059.1,NM_001376060.1,NM_003865.3,XM_005265526.4	GRCh38.p13	chr3:57198914-57199772
36116	CCKAR_01	CCKAR	CCKAR	NM_000730.3	GRCh38.p13	chr4:26485851-26489234
12613	MTRNR2L7_01	MTRNR2L7	MTRNR2L7	NM_001190489.1	GRCh38.p13	chr10:37602665-37602699
39708	TPBGL_01	TPBGL	TPBGL	NM_001195528.2	GRCh38.p13	chr11:75242859-75242893
34981	CRTC2_01	CRTC2	CRTC2	XM_017000575.1,XM_005244946.1,XR_001737031.2,XM_005244949.2,XM_017000576.1,XR_001737032.2,XM_017000577.1,NM_181715.3,XM_017000578.1,XM_017000579.1	GRCh38.p13	chr1:153948293-153948328
11446	BLID_01	BLID	BLID	NM_001001786.3	GRCh38.p13	chr11:122115838-122115872
37602	TNFRSF25_01	TNFRSF25	TNFRSF25	NM_003790.3,NM_148967.1,NM_001039664.1,NM_148966.1,NM_148970.1,NM_148965.1	GRCh38.p13	chr1:6465492-6465527
43201	HES1_01	HES1	HES1	NM_005524.4	GRCh38.p13	chr3:194138065-194138114
40001	NUB1_01	NUB1	NUB1	XM_017012308.1,XM_017012309.1,NM_001385353.1,XM_017012307.1,NM_016118.5,NM_001385356.1,XM_017012306.1,NM_001385361.1,XM_024446798.1,XM_024446799.1,NM_001363529.2,NM_001243351.2,XM_017012305.1,NM_001385355.1,XM_024446797.1,NM_001385354.1,XM_017012304.1	GRCh38.p13	chr7:151360185-151360234
37702	SYPL2_01	SYPL2	SYPL2	XM_011541283.2,XM_011541284.2,XM_011541285.1,NM_001040709.2	GRCh38.p13	chr1:109476846-109476893
39400	BEX2_01	BEX2	BEX2	NM_001168400.2,NM_032621.4,NM_001168401.2,NM_001168399.1	GRCh38.p13	chrX:103309923-103309972
48913	CARD14_01	CARD14	CARD14	XM_024450936.1,XM_024450934.1,XM_011525218.2,XM_011525213.1,XM_011525217.1,XM_024450937.1,XM_011525216.1,NM_024110.4,NR_047566.2,XR_002958066.1,NM_001366385.1,NM_001257970.1,NM_052819.2,XR_002958065.1,XM_024450935.1	GRCh38.p13	chr17:80198486-80198528
36106	CA4_01	CA4	CA4	XR_001752605.2,XM_005257639.3,NM_000717.5,XR_001752606.2,NR_137422.2,XM_011525183.2,XR_001752607.2,XM_017025012.1,XR_001752608.2,XR_001752610.2,XR_001752604.2,XR_001752609.2	GRCh38.p13	chr17:60156669-60156710
38258	SAMD12_01	SAMD12	SAMD12	NR_109794.2,NM_207506.3,NM_001363274.2,NR_146234.2,NM_001101676.2,NM_001349811.2	GRCh38.p13	chr8:118379672-118439852,chr8:118379697-118439877
37200	KHDC3L_01	KHDC3L	KHDC3L	NM_001017361.3	GRCh38.p13	chr6:73363878-73363921
37875	FNDC3A_01	FNDC3A	FNDC3A	NR_103528.2,NM_001079673.2,XM_017020442.2,NM_014923.5,XM_017020443.1,XM_011534997.3,NM_001278438.1,XM_017020440.2,XM_017020441.2	GRCh38.p13	chr13:49188590-49191020
49125	ACY3_01	ACY3	ACY3	XM_017018549.1,XM_017018551.1,NM_080658.2,XM_017018550.1	GRCh38.p13	chr11:67645714-67645758
50963	ORC3_01	ORC3	ORC3	XM_011535652.3,XM_011535651.2,XM_017010634.2,XM_017010636.2,XM_005248704.2,XM_005248706.1,XR_001743295.2,XM_017010635.2,NM_181837.2,XR_001743294.2,XM_017010638.2,XM_017010640.1,XM_017010637.1,NM_012381.4,XM_005248705.2,NM_001197259.1,XM_017010632.2,XM_017010639.1,XM_017010633.2	GRCh38.p13	chr6:87609108-87609153
47457	DNAJC1_01	DNAJC1	DNAJC1	XM_011519614.3,NM_022365.4,XM_017016536.2	GRCh38.p13	chr10:21920805-21920854
38513	WDSUB1_01	WDSUB1	WDSUB1	NM_001330276.2,NM_001330278.2,NM_001330280.2,XM_017003481.1,NM_152528.3,NM_001330274.2,XR_922879.2,NM_001128213.2,NM_001307994.2,NM_001128212.3,XR_001738651.1,XR_001738650.2	GRCh38.p13	chr2:159283012-159283061
37870	ART5_01	ART5	ART5	XM_005252779.3,XM_006718136.4,NM_053017.5,XM_011519879.3,NM_001079536.1,NM_001297668.2	GRCh38.p13	chr11:3640084-3640123
42033	ENC1_01	ENC1	ENC1	NM_001256575.1,XM_011543697.3,XM_011543696.3,NM_001256576.1,NM_003633.3,NR_046318.1,NM_001256574.1	GRCh38.p13	chr5:74628116-74628165
40212	CDH19_01	CDH19	CDH19	NM_021153.4,XM_017025711.2,XM_011525932.1,NM_001271028.2,NR_073130.2,XM_011525931.3	GRCh38.p13	chr18:66544152-66544201
43241	MDFI_01	MDFI	MDFI	NM_001300806.2,NM_005586.4,XM_017010867.1,XM_011514625.2,NM_001300804.2,XM_005249117.3,XM_011514626.2,NM_001300805.2	GRCh38.p13	chr6:41649738-41649772
39959	ZNF385C_01	ZNF385C	ZNF385C	NM_001378270.1,NM_001242704.1	GRCh38.p13	chr17:42025802-42025843
46775	CA10_01	CA10	CA10	NM_020178.5,XM_017024878.2,NM_001082534.1,NM_001082533.1	GRCh38.p13	chr17:51635930-51635979
50089	RWDD4_01	RWDD4	RWDD4	NM_001307922.2,NM_152682.4,XR_002959716.1	GRCh38.p13	chr4:183651040-183651089
45972	EFEMP2_01	EFEMP2	EFEMP2	NM_016938.5,NR_037718.2	GRCh38.p13	chr11:65867049-65867879
36367	RAET1G_01	RAET1G	RAET1G	XM_011535800.3,NM_001001788.4,NR_130110.2,XM_017010831.2	GRCh38.p13	chr6:149923018-149923053
44997	TTLL4_01	TTLL4	TTLL4	XM_017005389.1,XR_923069.2,NM_014640.5,XM_006712875.2,XM_017005391.1,XM_017005390.1,XM_017005387.1,XM_017005392.2,XM_017005388.1	GRCh38.p13	chr2:218747673-218747722
43502	MANF_01	MANF	MANF	NM_006010.6	GRCh38.p13	chr3:51386313-51387763
52033	PRKCG_01	PRKCG	PRKCG	NM_001316329.2,NM_002739.5	GRCh38.p13	chr19:53907154-53907188
48884	KRT71_01	KRT71	KRT71	NM_033448.3,XM_017018749.1	GRCh38.p13	chr12:52546503-52547888
50153	FAS_01	FAS	FAS	NR_028035.4,NM_152872.4,NR_028033.4,NM_000043.6,XM_011539766.2,NR_135315.2,XM_011539767.3,NM_001320619.2,NR_028034.4,NR_135314.2,XR_945733.2,XM_006717819.3,NR_028036.4,NM_152871.4,XM_011539765.2,NR_135313.2,XM_011539764.2,XR_945732.3	GRCh38.p13	chr10:89015147-89015196
44888	IL20RA_01	IL20RA	IL20RA	XM_006715506.2,XM_017010955.1,XM_017010954.2,NM_001278723.1,NM_001278722.1,NM_014432.3,XM_011535904.2,NM_001278724.2	GRCh38.p13	chr6:137017040-137017089
12058	GJA3_01	GJA3	GJA3	NM_021954.4,XM_011535048.2	GRCh38.p13	chr13:20142774-20142817
51162	SNRPB2_01	SNRPB2	SNRPB2	NM_198220.3,NM_003092.5	GRCh38.p13	chr20:16740946-16740995
35552	NSL1_01	NSL1	NSL1	NM_015471.4,NM_001297739.2,XM_017000969.1,XM_017000968.1,NM_001297737.2,NM_001042549.2,NM_001297736.2	GRCh38.p13	chr1:212784399-212784437
48406	ZNF394_01	ZNF394	ZNF394	NM_032164.4,NM_001345967.2,NM_001345968.1	GRCh38.p13	chr7:99500161-99500196
46833	PITHD1_01	PITHD1	PITHD1	XM_011541804.1,NM_020362.5	GRCh38.p13	chr1:23787749-23787798
45053	SUSD6_01	SUSD6	SUSD6	NM_014734.4	GRCh38.p13	chr14:69714611-69714660
44766	SLC6A7_01	SLC6A7	SLC6A7	XM_024446190.1,XM_017009769.2,XR_001742210.1,XR_001742211.1,XM_017009767.1,XM_017009770.2,XM_017009768.2,XR_001742212.1,NM_014228.5	GRCh38.p13	chr5:150202398-150202436
37770	DIPK1C_01	DIPK1C	DIPK1C	XM_017025551.2,XM_011525816.3,NM_001044369.3,XR_001753141.1	GRCh38.p13	chr18:74435773-74435814
35009	NOLC1_01	NOLC1	NOLC1	NM_004741.5,NM_001284389.2,XM_005270273.2,NM_001284388.1	GRCh38.p13	chr10:102152460-102152495
51727	FLACC1_01	FLACC1	FLACC1	NM_001289993.2,NM_139163.3,XM_017003362.2,NM_001127391.3,NR_110620.2,XM_011510606.3,XM_024452696.1,XM_024452697.1,XM_011510610.3,XM_017003361.2	GRCh38.p13	chr2:201346602-201346651
47528	GAREM1_01	GAREM1	GAREM1	NM_001242409.2,XM_024451236.1,XM_024451234.1,NM_022751.3,XM_024451235.1	GRCh38.p13	chr18:32266757-32266806
43139	TNP2_01	TNP2	TNP2	NM_005425.5	GRCh38.p13	chr16:11267919-11267968
35873	VDR_01	VDR	VDR	NM_001374661.1,NM_001364085.2,NM_001017536.2,XM_011538720.2,NM_000376.3,NM_001017535.2,XM_024449178.1,NM_001374662.1	GRCh38.p13	chr12:47846669-47846704
36993	FAM102B_01	FAM102B	FAM102B	NM_001010883.3	GRCh38.p13	chr1:108612228-108612277
50632	ZAR1_01	ZAR1	ZAR1	NM_175619.3,XR_002959728.1,XR_925129.3	GRCh38.p13	chr4:48492957-48493006
34454	MIX23_01	MIX23	MIX23	NM_001017928.4,XM_017005697.2,NM_001308326.1,XR_924096.3,XR_924097.2,XM_011512410.2	GRCh38.p13	chr3:122371709-122371758
42276	ATP6V0B_01	ATP6V0B	ATP6V0B	NM_001039457.3,NM_004047.5,NM_001294333.2	GRCh38.p13	chr1:43977995-43978044
42415	MED17_01	MED17	MED17	NM_004268.5	GRCh38.p13	chr11:93812835-93812884
47165	NFS1_01	NFS1	NFS1	NM_001198989.2,NM_021100.5,NR_037570.3	GRCh38.p13	chr20:35669185-35669234
37100	ADAL_01	ADAL	ADAL	NM_001324367.2,XM_011521291.2,XM_024449858.1,NM_001324366.2,NM_001012969.4,XM_017021964.2,NM_001324368.2,XM_017021969.1,XM_017021965.1,XM_017021968.1,NM_001324365.2,NM_001324364.1,XM_017021966.2,NM_001159280.3,XM_017021967.1,XM_024449859.1	GRCh38.p13	chr15:43345896-43345945
44707	MAGEH1_01	MAGEH1	MAGEH1	NM_014061.5	GRCh38.p13	chrX:55452935-55452984
47891	CLMP_01	CLMP	CLMP	NM_024769.5	GRCh38.p13	chr11:123084529-123084573
39981	SNCAIP_01	SNCAIP	SNCAIP	XM_017010079.1,NM_001308107.2,NM_001308106.1,XM_006714734.2,XM_005272139.1,NM_001308105.1,XM_017010085.1,XM_017010081.1,NM_001308109.2,XM_005272138.4,NM_001308108.1,XM_011543738.2,XM_017010083.1,XM_017010082.1,XM_011543737.2,NM_005460.4,NR_131761.1,XM_011543739.1,XM_011543750.1,XM_011543749.2,XM_024446266.1,XM_024446267.1,NR_131762.1,XM_017010080.1,XM_024446268.1,XM_024446269.1,XM_011543743.2,XR_…	GRCh38.p13	chr5:122449845-122449894
35770	LCAT_01	LCAT	LCAT	NM_000229.2	GRCh38.p13	chr16:67940293-67940342
40709	FMO2_01	FMO2	FMO2	XR_001737072.2,XR_921761.3,NM_001301347.2,NM_001365900.1,NR_160266.1,NM_001460.5	GRCh38.p13	chr1:171205345-171205394
34714	CENPP_01	CENPP	CENPP	NM_001286969.1,XM_024447543.1,NM_001012267.3,NM_001286971.1	GRCh38.p13	chr9:92613075-92613109
49889	DEPDC4_01	DEPDC4	DEPDC4	XM_017018784.2,XM_011537876.2,XM_017018785.2,XM_017018780.2,XR_944493.3,XR_001748573.1,XM_017018782.2,NM_152317.4,NM_001319310.1,NR_135073.1,NM_001319311.1,NM_001364818.1,XM_017018779.2	GRCh38.p13	chr12:100266979-100267013
51833	USP9Y_01	USP9Y	USP9Y	XM_017030078.2,NM_004654.4	GRCh38.p13	chrY:12841077-12841126
49881	RMI2_01	RMI2	RMI2	NM_152308.3,NR_130754.1	GRCh38.p13	chr16:11351269-11351318
43864	GNB5_01	GNB5	GNB5	XR_001751060.2,XM_011521162.3,NM_006578.4,XM_017021867.2,NM_016194.4,NM_001379343.1	GRCh38.p13	chr15:52122645-52122694
44126	DNAJB4_01	DNAJB4	DNAJB4	NM_001317100.1,NM_001317103.1,NM_001317102.1,NM_007034.5,NM_001317099.1,NM_001317101.1	GRCh38.p13	chr1:78016074-78016123
42809	CIR1_01	CIR1	CIR1	NM_004882.4	GRCh38.p13	chr2:174395651-174395700
36068	ADH4_01	ADH4	ADH4	NM_000670.5,NM_001306172.1,NM_001306171.1	GRCh38.p13	chr4:99141589-99141638
13713	ZNF443_01	ZNF443	ZNF443	NM_005815.5	GRCh38.p13	chr19:12440957-12440991
40227	IZUMO3_01	IZUMO3	IZUMO3	NM_001365008.2,XM_005251333.3,XM_006716714.4,NM_001271706.1	GRCh38.p13	chr9:24545260-24545446
38046	TMEM219_01	TMEM219	TMEM219	NR_161465.1,XM_005255123.1,NM_194280.4,NM_001369689.1,NM_001369688.1,NM_001083613.2,NR_161466.1	GRCh38.p13	chr16:29971467-29971509
40271	B3GALNT2_01	B3GALNT2	B3GALNT2	XM_006711749.3,XM_017000394.1,XM_017000395.1,NM_152490.5,XR_001736989.1,XR_001736988.1,XR_001736990.1,XR_001736987.1,NM_001277155.3	GRCh38.p13	chr1:235494713-235494762
50109	CCDC89_01	CCDC89	CCDC89	NM_152723.3	GRCh38.p13	chr11:85685102-85685137
49235	EPS8L1_01	EPS8L1	EPS8L1	XM_011527052.3,NM_133180.3,XM_011527051.3,XM_011527050.1,NM_017729.3,XM_005259020.2	GRCh38.p13	chr19:55081487-55081806
39804	CENPO_01	CENPO	CENPO	NR_136183.2,NM_024322.3,NR_136184.2,NM_001322101.2,NR_136182.2,NM_001199803.3,XR_244957.2	GRCh38.p13	chr2:24799830-24814399
48964	KLHL29_01	KLHL29	KLHL29	NM_052920.2,XM_006711929.3,XM_011532501.2,XM_017003264.2	GRCh38.p13	chr2:23708192-23708241
39254	FBXL17_01	FBXL17	FBXL17	XM_011543574.3,XM_011543577.2,XM_005272048.4,XM_011543575.2,XM_017009729.2,XR_427717.3,XM_011543578.2,XM_011543580.2,XM_011543576.3,XM_011543579.2,XM_005272050.4,NM_001163315.3	GRCh38.p13	chr5:108348492-108364748
47210	CYP4F11_01	CYP4F11	CYP4F11	NM_021187.3,NM_001128932.1	GRCh38.p13	chr19:15912515-15912564
36598	OR4D10_01	OR4D10	OR4D10	NM_001004705.2
36705	OR9K2_01	OR9K2	OR9K2	NM_001005243.1	GRCh38.p13	chr12:55129797-55129846
40258	C1orf141_01	C1orf141	C1orf141	NM_001276352.2,XM_017001276.1,XM_011541466.2,XM_011541467.1,XM_011541465.2,NM_001276351.2,XM_011541469.1,NR_075077.2	GRCh38.p13	chr1:67092645-67092694
41187	JAK1_01	JAK1	JAK1	NM_001320923.1,NM_001321854.2,NM_001321855.2,NM_001321856.1,NM_001321852.2,NM_001321857.2,NM_001321853.2,NM_002227.4	GRCh38.p13	chr1:64873507-64879057
47844	TTLL7_01	TTLL7	TTLL7	NM_001350214.2,XR_946758.3,NM_024686.6,NM_001350215.2,XR_001737413.2,XM_017002349.2,XR_001737414.2,XR_001737412.2,XR_001737409.2,XM_024449807.1,XR_001737410.2,XR_001737415.2,XR_001737411.2,XM_011542159.3,XR_946760.3	GRCh38.p13	chr1:83937968-83947124,chr1:83937968-83942463
48530	FBN3_01	FBN3	FBN3	XM_017027377.2,NM_032447.5,XM_017027372.1,XM_017027379.1,XM_017027376.1,XM_017027378.2,NM_001321431.1,XM_017027375.2,XM_017027374.2,XM_017027373.1	GRCh38.p13	chr19:8090199-8090248
42758	SLC22A14_01	SLC22A14	SLC22A14	XM_005265585.4,XM_006713418.4,XM_006713416.3,NM_001320033.1,XM_006713417.3,XM_011534247.2,NM_004803.4,XM_011534245.2	GRCh38.p13	chr3:38308981-38309025
39408	AQP8_01	AQP8	AQP8	XM_011545823.2,XM_011545822.2,NM_001169.3	GRCh38.p13	chr16:25217002-25217048
36278	PTAFR_01	PTAFR	PTAFR	NM_001164722.3,NM_001164723.3,NM_000952.5,NM_001164721.1	GRCh38.p13	chr1:28150064-28150113
12369	KIAA0754_01	KIAA0754	KIAA0754	NM_015038.2	GRCh38.p13	chr1:39412417-39412451
12311	IL1RAPL2_01	IL1RAPL2	IL1RAPL2	XM_011530905.2,NM_017416.2	GRCh38.p13	chrX:105767469-105767503
43826	DYNLT3_01	DYNLT3	DYNLT3	NM_006520.3	GRCh38.p13	chrX:37840602-37840651
46776	SMCO4_01	SMCO4	SMCO4	NM_020179.3,XM_011542909.1,XM_011542907.1,XM_011542911.2,XM_011542910.3,XM_017018019.2,XM_017018020.1	GRCh38.p13	chr11:93478658-93478707
49362	SDSL_01	SDSL	SDSL	XM_017018763.1,XM_011537846.2,NM_001304993.2,XM_005253831.5,NM_138432.3	GRCh38.p13	chr12:113428126-113428428
40053	SPAG6_01	SPAG6	SPAG6	NM_001253854.2,NM_001253855.1,XM_005252645.2,NM_172242.3,XM_005252646.2,NM_012443.4	GRCh38.p13	chr10:22386804-22386853
50690	TAS2R38_01	TAS2R38	TAS2R38	NM_176817.5	GRCh38.p13	chr7:141973278-141973327
50944	ZNF233_01	ZNF233	ZNF233	NM_181756.2,XM_017026758.2,NM_001207005.1,XM_024451488.1,XM_024451489.1,NM_001330529.1	GRCh38.p13	chr19:44273785-44273834
52097	WWC2_01	WWC2	WWC2	XM_024454225.1,XM_011532269.3,NM_024949.6	GRCh38.p13	chr4:183282871-183282905
42747	SLC22A6_01	SLC22A6	SLC22A6	NM_153278.3,NM_004790.5,NM_153277.3,XM_017018562.2,NM_153276.3	GRCh38.p13	chr11:62981996-62983562
49217	DPP6_01	DPP6	DPP6	NM_001364502.2,NM_001364501.1,NM_130797.4,NR_157195.1,NM_001039350.3,NM_001364497.2,NM_001364498.2,NM_001364499.2,NM_001936.5,NM_001364500.2,NM_001290253.2,NM_001290252.2,NR_157196.2	GRCh38.p13	chr7:154474941-154474990
48472	SLC25A33_01	SLC25A33	SLC25A33	XM_011542296.1,NM_032315.3,XM_005263503.4	GRCh38.p13	chr1:9582411-9582460
50948	TMTC3_01	TMTC3	TMTC3	NM_181783.4,NM_001366583.1,NM_001366574.1,NM_001366579.1,NR_159381.1,NM_001366580.1	GRCh38.p13	chr12:88194960-88195009
39632	PDE1C_01	PDE1C	PDE1C	XR_001744802.1,NM_001322056.1,XR_001744805.1,XR_001744804.1,XM_017012264.1,NM_001322059.1,NM_005020.5,XR_002956451.1,XR_001744803.1,NM_001322055.1,NM_001322058.2,NM_001191056.3,XM_017012267.1,XM_017012265.1,XR_001744806.1,NM_001191057.4,NM_001191059.3,XM_017012266.1,NM_001191058.4,NM_001322057.1	GRCh38.p13	chr7:31823181-31823222
36641	OR51M1_01	OR51M1	OR51M1	NM_001004756.3
49057	RFFL_01	RFFL	RFFL,RAD51L3-RFFL	NM_001017368.2,NR_037714.1,NR_037713.2	GRCh38.p13	chr17:35011199-35011248
48763	ACP4_01	ACP4	ACP4	NM_033068.3	GRCh38.p13	chr19:50793938-50794461
40328	ADCY1_01	ADCY1	ADCY1	NM_001281768.1,NM_021116.4,XM_005249584.3,XM_005249585.2	GRCh38.p13	chr7:45660045-45660086
43721	LRRN2_01	LRRN2	LRRN2	XM_017000050.2,NM_006338.3,NM_201630.2,XM_011509066.2,XM_005244827.3	GRCh38.p13	chr1:204617616-204617655
40064	ARHGAP22_01	ARHGAP22	ARHGAP22	XM_011540015.3,NM_001256024.2,NM_001256025.3,XR_002956999.1,XR_002957002.1,XR_002956998.1,XR_002957003.1,NM_001256026.2,XM_017016471.2,XR_002957000.1,XM_011540006.2,NR_144646.2,XR_001747166.2,XM_011540012.3,NR_144644.2,XM_011540013.3,XM_024448103.1,NR_144645.2,NR_144643.2,XM_011540002.2,NR_045675.2,XR_002957001.1,XM_011540003.1,XM_024448099.1,XM_024448101.1,XM_024448100.1,NR_144642.2,NM_001347735…	GRCh38.p13	chr10:48454109-48454157
45995	PRKAG3_01	PRKAG3	PRKAG3	NM_017431.3,XM_017004343.2	GRCh38.p13	chr2:218826930-218826974
50538	LVRN_01	LVRN	LVRN	NM_173800.5	GRCh38.p13	chr5:115999868-116000447
41055	FUT4_01	FUT4	FUT4	NM_002033.3	GRCh38.p13	chr11:94545356-94545405
39970	NDRG4_01	NDRG4	NDRG4	NM_022910.4,NM_001378341.1,NM_001242833.1,NM_001242834.1,NM_001378346.1,NM_001130487.2,NM_001378347.1,NR_040072.1,XM_006721256.3,NM_001378344.1,NM_001378345.1,XM_017023582.2,XM_011523294.2,XM_024450398.1,NM_020465.4,NM_001378333.1,NM_001378332.1,NM_001378337.1,XM_011523293.2,NM_001378336.1,XM_006721253.3,NM_001378342.1,NM_001378343.1,XM_011523291.3,NM_001378335.1,XM_011523290.3,NM_001378334.1,XM_…	GRCh38.p13	chr16:58513516-58513565
34824	INO80C_01	INO80C	INO80C	XM_024451089.1,XM_005258197.5,XM_005258196.5,NM_194281.4,NM_001098817.2,XM_017025549.1,NM_001308064.2,XM_011525812.3	GRCh38.p13	chr18:35479348-35479382
12385	KLF9_01	KLF9	KLF9	NM_001206.2	GRCh38.p13	chr9:70387779-70387814
37239	GNG10_01	GNG10	GNG10,DNAJC25-GNG10	NM_001198664.2,NM_001017998.4,NM_004125.4	GRCh38.p13	chr9:111669402-111669451
47554	PER2_01	PER2	PER2	XM_006712824.4,NM_022817.3,XM_005246111.4	GRCh38.p13	chr2:238268175-238268948
49232	COX7B2_01	COX7B2	COX7B2	XM_005248056.4,XM_011513632.2,XM_011513636.1,XM_011513633.2,XM_011513637.2,NM_130902.3,XM_011513630.2,XM_011513634.2,XM_011513631.2,XM_011513638.2,XM_011513635.2	GRCh38.p13	chr4:46735135-46735184
46325	RFWD3_01	RFWD3	RFWD3	NM_001370535.1,NM_001370534.1,NM_018124.4,NM_001370540.1,XM_011523191.3,XM_017023391.1,XM_006721228.3,NM_001370537.1,NM_001370539.1,NM_001370536.1,NM_001370543.1,NM_001370542.1,XM_005256022.4	GRCh38.p13	chr16:74623576-74623625
37512	ZNF829_01	ZNF829	ZNF829	XM_011526933.2,XM_005258876.4,NM_001037232.4,NM_001171979.2	GRCh38.p13	chr19:36908421-36914975
40104	COX14_01	COX14	COX14	NM_001257133.2,NM_032901.4,NM_001257134.2	GRCh38.p13	chr12:50120377-50120426
45757	POLK_01	POLK	POLK	XR_001742107.2,NM_001345921.1,XM_017009561.2,NR_144315.1,XM_011543464.3,XR_002956163.1,XR_001742108.2,XR_241784.3,NM_001345922.1,XM_017009559.2,XM_006714652.4,XM_017009563.2,XM_011543463.3,XR_001742105.2,NM_016218.3,XM_011543467.3,XM_005248534.5,XR_948273.3,XM_017009560.2	GRCh38.p13	chr5:75587048-75590382
49190	DGUOK_01	DGUOK	DGUOK	NM_001318863.2,NM_001318861.2,NM_001318859.2,XM_011532647.2,NM_001318860.2,NM_080916.3,XR_001738656.1,NR_134898.2,NR_134895.2,NR_134894.2,XR_244926.3,NM_001318862.2,NR_134897.2,NM_080918.3,NR_134893.2,NR_134896.2,XM_024452739.1	GRCh38.p13	chr2:73958770-73958819
36819	UHRF1BP1L_01	UHRF1BP1L	UHRF1BP1L	XM_005268738.3,XM_017019048.2,XM_017019049.1,XM_017019047.1,XR_001748630.1,XM_017019051.2,NM_001006947.2,XM_017019050.2,NM_015054.2,XM_005268739.4	GRCh38.p13	chr12:100098511-100102784
46674	MAGEL2_01	MAGEL2	MAGEL2	NM_019066.5	GRCh38.p13	chr15:23644291-23644340
45056	EIF4A3_01	EIF4A3	EIF4A3	NM_014740.4,XM_011525522.2	GRCh38.p13	chr17:80138256-80139044
34730	LUC7L2_01	LUC7L2	FMC1-LUC7L2,LUC7L2	NM_001244584.2,NM_016019.5,NM_001244585.1,NM_001270643.1	GRCh38.p13	chr7:139422167-139422211
44490	PFAS_01	PFAS	PFAS	XR_934047.2,XM_017024760.1,NM_012393.3,XM_024450804.1,XM_006721546.3	GRCh38.p13	chr17:8263585-8263634
38623	NEMP1_01	NEMP1	NEMP1	XM_011538056.2,XM_017019078.1,NM_001130963.2,XM_024448900.1,XM_011538057.2,XM_011538059.1,XM_011538060.2,NM_015257.3,XM_011538058.3,XM_017019079.1	GRCh38.p13	chr12:57070888-57072831
47038	MRTFA_01	MRTFA	MRTFA	NM_001318139.2,NM_001282661.3,NM_001282660.2,NM_001282662.3,NM_020831.6	GRCh38.p13	chr22:40410728-40410762
47596	FRY_01	FRY	FRY	XM_006719749.3,NM_023037.3,XM_017020306.1,XM_017020307.2,XM_017020305.2	GRCh38.p13	chr13:32210878-32210927
39507	DMXL2_01	DMXL2	DMXL2	NM_001378457.1,XR_001751173.1,XM_017022034.1,NM_015263.5,NM_001378458.1,NM_001378459.1,NM_001378461.1,NM_001378460.1,XR_001751175.1,XR_001751174.1,XR_931780.2,XR_931781.2,XR_001751177.1,XM_011521402.3,XR_001751176.1,NM_001174117.3,NM_001174116.3,NR_165648.1,XR_931779.2,XR_931782.2,NM_001378464.1,NM_001378463.1,NM_001378462.1,NR_165649.1	GRCh38.p13	chr15:51576102-51576151
39618	CNOT4_01	CNOT4	CNOT4	NM_001008225.2,XM_024446772.1,NM_001190850.1,NM_001190848.1,NM_001190847.2,NM_013316.4,NM_001190849.2,XM_017012235.1	GRCh38.p13	chr7:135414378-135414427
46496	SLC22A15_01	SLC22A15	SLC22A15	NM_018420.3,XM_005271004.3,XR_002957033.1,XR_002957032.1,XM_024448239.1,XM_024448238.1,XR_002957029.1,XR_002957035.1,XR_002957027.1,XR_002957031.1,XR_002957034.1,XR_002957030.1	GRCh38.p13	chr1:116020770-116020819
42161	RGS9_01	RGS9	RGS9	NM_001081955.3,NM_001165933.2,NM_003835.4	GRCh38.p13	chr17:65197133-65197182
42759	CIAO1_01	CIAO1	CIAO1	NM_004804.3,XM_024453247.1	GRCh38.p13	chr2:96272113-96272162
42175	IL1RL2_01	IL1RL2	IL1RL2	XR_923053.2,XM_017005175.1,XM_011512094.1,NM_001351450.2,XM_017005177.1,XM_006712820.2,NM_001351448.1,NM_001351447.1,XM_011512093.1,NM_003854.4,XM_011512092.1,XM_017005176.1,XM_011512096.1,XM_017005180.1,NM_001351449.2,XM_006712822.3,XM_011512091.1,NM_001351446.1,XM_017005174.2	GRCh38.p13	chr2:102219927-102219976
50103	TBATA_01	TBATA	TBATA	XR_001747054.1,NM_001318243.2,NM_001318242.2,XR_001747057.1,XM_017015845.1,XM_017015846.1,XM_017015847.1,XR_001747056.1,XM_017015858.1,NR_134533.2,XM_017015848.1,NR_165441.1,NR_134532.2,NR_134531.2,NR_134534.2,XM_017015856.1,XM_017015853.1,XM_017015852.1,XM_017015860.1,XM_017015849.1,NM_152710.4,NM_001318241.2,XR_001747055.1	GRCh38.p13	chr10:70771432-70772524
46336	PRMT6_01	PRMT6	PRMT6	NM_018137.3	GRCh38.p13	chr1:107058217-107058266
44099	NPIPA1_01	NPIPA1	PKD1P4-NPIPA8,PKD1P3-NPIPA1,PKD1P6-NPIPP1,PDXDC2P-NPIPB14P,PKD1P5-LOC105376752,NPIPA8,PKD1P1,NPIPA5,NPIPA7,NPIPA1,NPIPA2,NPIPA3	NR_146336.1,NM_001277325.2,XM_017023554.1,NM_001351200.1,XM_011522585.1,XM_005255485.4,XM_024450380.1,XM_011522584.2,XR_932754.3,XM_024450381.1,XM_017023553.1,NR_036447.1,NM_001277324.1,XM_017022833.2,XM_024450382.1,XM_024450383.1,XM_024450139.1,XM_024450137.1,XM_024450138.1,XM_024450136.1,XM_017022835.1,XM_011522580.2,NM_001282507.1,NR_146331.1,XM_011522339.3,XM_024450385.1,XM_011522337.1,XM_005…	GRCh38.p13	chr16:14945652-14945864,chr16:16344123-16344335,chr16:15369829-15370041,chr16:15110531-15110743,chr16:69982467-69982679,chr16:14719905-14720117,chr16:14759025-14759237,chr16:18324208-18324420,chr16:18364344-18364556,chr16:16387477-16387689
44387	OGA_01	OGA	OGA	XM_017015585.1,NM_001142434.1,XM_024447782.1,XM_017015586.1,NM_012215.5	GRCh38.p13	chr10:101798946-101798995
47331	CELF5_01	CELF5	CELF5	NR_033342.2,XM_011528174.3,XM_017027111.1,XM_006722833.1,XM_006722837.4,XM_006722836.2,XM_011528173.1,XM_006722832.1,XM_006722838.4,XR_001753733.1,XR_430147.1,NM_021938.4,NM_001172673.2	GRCh38.p13	chr19:3296905-3296954
39412	DZIP1L_01	DZIP1L	DZIP1L	XM_011512520.3,XM_006713526.1,XM_006713527.3,XM_011512524.2,XR_001740045.1,NM_173543.3,XM_005247198.3,XM_011512522.1,XM_011512518.2,XM_005247200.4,NM_001170538.1,XM_017005841.1,XM_011512521.2	GRCh38.p13	chr3:138071742-138071785
41484	POU5F1_01	POU5F1	POU5F1B,POU5F1,POU5F1P5	NM_001285987.1,NM_001159542.2,NM_001285986.1,NM_001173531.2,NR_131184.1,NM_203289.5,NM_002701.6	GRCh38.p13	chr6:31164416-31164462,chr8:127417084-127417130,chr10:68010019-68010065
44359	FBXL6_01	FBXL6	FBXL6	NM_024555.6,NM_012162.4	GRCh38.p13	chr8:144357466-144357630
46301	IPO9_01	IPO9	IPO9	NM_018085.5	GRCh38.p13	chr1:201847637-201848440
49896	FRMD6_01	FRMD6	FRMD6	XM_011536424.1,NM_001042481.3,NM_152330.4,XM_024449475.1,XM_017020968.2,XM_011536423.1,XM_006720029.1,NM_001267046.2,XM_024449476.1,NM_001267047.1,XM_006720030.1,XM_024449472.1,XM_017020967.1,XM_024449473.1,XM_024449474.1	GRCh38.p13	chr14:51725824-51727747,chr14:51725824-51727607
49586	SLFN13_01	SLFN13	SLFN13	XM_024450614.1,XM_011524383.2,XM_024450615.1,XM_017024233.1,XM_017024232.1,NM_144682.6,XM_005257922.2	GRCh38.p13	chr17:35443882-35444625
13190	SELENOV_01	SELENOV	SELENOV	NM_001350809.1,NM_182704.1,NR_146916.2	GRCh38.p13	chr19:39515915-39515952
50855	LAYN_01	LAYN	LAYN	NM_178834.5,NM_001318799.1,XM_006718770.4,NM_001258390.1,NM_001258391.1,XM_006718769.4	GRCh38.p13	chr11:111560348-111560397
36132	CSF1_01	CSF1	CSF1	XM_017000369.1,NM_000757.6,NM_172211.4,NM_172212.3,NM_172210.3	GRCh38.p13	chr1:109921911-109921960
43220	KLC1_01	KLC1	KLC1	NM_005552.4,NM_001130107.1,NM_182923.3	GRCh38.p13	chr14:103662897-103669529
36357	MED11_01	MED11	MED11	NM_001305000.2,NM_001001683.4	GRCh38.p13	chr17:4731779-4731826
48891	SELENOI_01	SELENOI	SELENOI	NR_137633.2,NM_033505.4	GRCh38.p13	chr2:26391608-26391657
49145	C20orf141_01	C20orf141	C20orf141	NM_080739.2,NM_001256538.2	GRCh38.p13	chr20:2815622-2815658
45463	SIN3A_01	SIN3A	SIN3A	NM_001145358.2,XM_006720466.3,NM_015477.3,XM_024449896.1,NM_001145357.2,XM_006720465.3,XM_006720467.3	GRCh38.p13	chr15:75401932-75407065
36518	ZNF774_01	ZNF774	ZNF774	XR_001751249.2,XM_017022128.2,NM_001004309.3,XM_017022127.1,XM_017022129.1	GRCh38.p13	chr15:90361201-90361250
39832	SEC22C_01	SEC22C	SEC22C	XM_024453815.1,XM_017007438.2,XM_024453814.1,XM_011534212.2,XM_005265533.1,NM_001201572.2,XM_017007439.2,XM_024453813.1,XM_024453812.1,XM_024453817.1,XM_024453816.1,NM_001201584.2,NM_032970.4,XM_005265534.1,XM_005265535.1,NM_004206.4	GRCh38.p13	chr3:42557591-42557640
39258	ZNF580_01	ZNF580	ZNF580	NM_016202.2,NM_207115.2,NM_001163423.1	GRCh38.p13	chr19:55642835-55642873
41590	RAF1_01	RAF1	RAF1	NM_001354693.3,NR_148940.3,XR_001740227.1,NR_148941.3,NM_001354694.3,NM_001354690.3,NM_001354691.3,NR_148942.3,NM_001354695.3,XM_017006966.1,XM_011533974.3,NM_002880.4,NM_001354689.3,NM_001354692.3	GRCh38.p13	chr3:12590947-12591729
42903	RAC3_01	RAC3	RAC3	NM_005052.3,NM_001316307.2	GRCh38.p13	chr17:82033897-82033931
39812	SH3GL1_01	SH3GL1	SH3GL1	XM_017027146.1,NM_001199943.2,XM_011528183.2,NM_003025.4,NM_001199944.2	GRCh38.p13	chr19:4361651-4361692
41541	PSMB6_01	PSMB6	PSMB6	NM_002798.3,NM_001270481.1	GRCh38.p13	chr17:4798365-4798414
46220	PRPF39_01	PRPF39	PRPF39	NM_017922.4	GRCh38.p13	chr14:45096227-45096934
36372	OR2T35_01	OR2T35	OR2T35,OR2T2	NM_001004136.2,NM_001001827.2
50101	TEX47_01	TEX47	TEX47	XM_011515904.2,NM_152706.4	GRCh38.p13	chr7:88794201-88794250
49974	LRFN5_01	LRFN5	LRFN5	NM_001346175.1,NM_001330106.1,NM_152447.4,NM_001346173.1,NR_144388.1,NR_144389.1	GRCh38.p13	chr14:41608066-41608115
42093	PTCH2_01	PTCH2	PTCH2	NM_003738.5,NM_001166292.1	GRCh38.p13	chr1:44831764-44831990
36361	DDI1_01	DDI1	DDI1	NM_001001711.3	GRCh38.p13	chr11:104039049-104039097
40190	ACADVL_01	ACADVL	ACADVL	XM_011523830.2,NM_001270447.1,XR_934022.2,NM_001270448.1,XM_024450741.1,XR_934021.2,XM_011523829.2,NM_000018.4,NM_001033859.2,XR_934023.2,XM_006721516.3	GRCh38.p13	chr17:7220656-7220794
51856	AVIL_01	AVIL	AVIL	XM_017018713.2,XM_017018712.2,XM_017018715.2,XM_024448800.1,XM_017018711.2,XM_017018714.2,NM_006576.3,XM_017018710.2	GRCh38.p13	chr12:57799819-57799868
49669	DRC1_01	DRC1	DRC1	XM_005264637.3,XM_017005271.1,XM_024453218.1,NM_145038.5	GRCh38.p13	chr2:26450085-26450640
40187	JAM2_01	JAM2	JAM2	XM_024452124.1,XR_937537.3,NM_001270407.1,NR_072999.2,NM_001270408.2,XM_024452123.1,NM_021219.4	GRCh38.p13	chr21:25698741-25698790
38393	JMJD7_01	JMJD7	JMJD7	NM_001114632.2	GRCh38.p13	chr15:41837424-41837473
34395	OR4E2_01	OR4E2	OR4E2	NM_001001912.3
46612	UTS2R_01	UTS2R	UTS2R	NM_018949.3,NM_001381897.1	GRCh38.p13	chr17:82374735-82374772
49155	WFDC10A_01	WFDC10A	WFDC10A	NM_080753.3,XM_017027679.1	GRCh38.p13	chr20:45630946-45630995
37450	MTERF2_01	MTERF2	MTERF2	NM_025198.4,XM_017019985.2,NM_001033050.3	GRCh38.p13	chr12:106977467-106977516
46474	NIPSNAP3B_01	NIPSNAP3B	NIPSNAP3B	NM_018376.4,NR_130760.2,NR_130759.2,XR_428532.1,XR_001746344.1,XR_001746345.1,XM_011518839.1	GRCh38.p13	chr9:104777234-104777283
48451	MRI1_01	MRI1	MRI1	NM_032285.4,NM_001031727.4,XR_244089.4,NR_138051.2,NM_001329572.2,XM_011528356.2	GRCh38.p13	chr19:13769010-13769048
47354	TMSB15A_01	TMSB15A	TMSB15B,TMSB15A	NM_021992.3,NM_001350211.1,NM_194324.4,NM_001350212.1	GRCh38.p13	chrX:103964605-103965570,chrX:102514093-102515081
41446	PGD_01	PGD	PGD	NM_001304452.2,NM_002631.4,NM_001304451.2	GRCh38.p13	chr1:10419730-10419779
50408	CPO_01	CPO	CPO	XM_017003372.2,NM_173077.3	GRCh38.p13	chr2:206939619-206949617
47657	PDCL3_01	PDCL3	PDCL3	NM_024065.5	GRCh38.p13	chr2:100563019-100563053
38746	ZBTB43_01	ZBTB43	ZBTB43	XM_011518411.2,XM_005251835.3,XM_011518409.1,NM_014007.4,NM_001135776.1	GRCh38.p13	chr9:126832870-126832919
46623	SNTG1_01	SNTG1	SNTG1	NM_001321777.2,XM_024447183.1,XM_011517548.2,XM_017013580.2,NR_135797.2,NM_001321776.2,NM_001321778.1,XM_017013579.1,XM_017013582.1,NR_135794.2,NM_001287814.3,NM_018967.5,NM_001321775.2,XM_017013581.1,NR_135795.2,NM_001287813.3,NR_135796.2,NR_135798.2,NM_001321773.2	GRCh38.p13	chr8:50553055-50553104
46941	ABHD6_01	ABHD6	ABHD6	NM_020676.6,XM_005265334.4,XM_005265335.3,NM_001320126.2	GRCh38.p13	chr3:58256672-58267204
45174	MLXIP_01	MLXIP	MLXIP	NM_014938.6,XM_006719291.4,XR_944509.3,XM_006719292.4,XM_006719293.3,XR_944508.3,XM_006719290.4,XR_001748624.2	GRCh38.p13	chr12:122130929-122132336
49699	GPHB5_01	GPHB5	GPHB5	NM_145171.4	GRCh38.p13	chr14:63317712-63317748
48583	KIF2B_01	KIF2B	KIF2B	NM_032559.5	GRCh38.p13	chr17:53824022-53824069
43733	ATP5PD_01	ATP5PD	ATP5PD	NM_006356.3,NM_001003785.2	GRCh38.p13	chr17:75038944-75038993
51390	RBM12B_01	RBM12B	RBM12B	NM_001377964.1,NM_001377961.1,NM_001377960.1,NM_203390.4,XM_011517029.2,NM_001377963.1,NM_001377962.1,XM_017013408.2	GRCh38.p13	chr8:93732088-93732137
44840	LCE2B_01	LCE2B	LCE2B	NM_014357.5	GRCh38.p13	chr1:152687245-152687294
44960	A1CF_01	A1CF	A1CF	NM_001370131.1,NM_001370130.1,NM_138932.2,XM_011539729.3,XM_024447966.1,NM_014576.4,XM_011539730.2,NM_138933.2,NM_001198818.1,XM_005269718.2,NM_001198819.1,NM_001198820.1	GRCh38.p13	chr10:50806713-50806762
41945	ZNF140_01	ZNF140	ZNF140	XM_011534838.2,XM_011534840.2,XM_011534833.2,XM_011534839.2,NM_003440.3,XM_011534837.2,NM_001300776.1,NM_001300777.1,XM_017019925.2,XM_017019924.1,XM_011534836.3,XM_005266188.4,XM_011534835.3,XM_011534834.3,NM_001300778.1	GRCh38.p13	chr12:133106382-133106431
40036	C14orf132_01	C14orf132	C14orf132	NM_001282463.2,NM_001282464.1,NM_001252507.3,NM_001289139.2,XM_017021469.1	GRCh38.p13	chr14:96086656-96086700
38980	NKIRAS2_01	NKIRAS2	NKIRAS2	NM_001144929.2,NM_001144928.2,NM_001144927.2,NM_017595.6,NM_001001349.2,XM_005257251.1	GRCh38.p13	chr17:42024356-42024403
38550	SLFN14_01	SLFN14	SLFN14	XM_017024577.1,NM_001129820.2,XM_017024578.1,XM_017024579.1	GRCh38.p13	chr17:35552833-35552882
49085	S100A16_01	S100A16	S100A16	NR_133645.2,NM_080388.3,NM_001317007.1,NM_001317008.1	GRCh38.p13	chr1:153607593-153607635
49463	ARX_01	ARX	ARX	NM_139058.3	GRCh38.p13	chrX:25003849-25003898
42201	SQSTM1_01	SQSTM1	SQSTM1	NM_001142299.2,NM_003900.5,NM_001142298.2	GRCh38.p13	chr5:179836677-179836725
49821	MMP21_01	MMP21	MMP21	NM_147191.1	GRCh38.p13	chr10:125770551-125772226
46256	KIF26B_01	KIF26B	KIF26B	XM_017030182.1,XM_017030183.1,NM_018012.4	GRCh38.p13	chr1:245609363-245609408
35967	F10_01	F10	F10	NM_001312675.2,NM_000504.4,NM_001312674.2	GRCh38.p13	chr13:113147380-113147424
50931	TAMALIN_01	TAMALIN	TAMALIN	NM_181711.4,NM_001271856.2,XM_011537996.1,XM_005268691.3	GRCh38.p13	chr12:52010914-52011061
39781	BLOC1S5_01	BLOC1S5	BLOC1S5	NM_001199322.1	GRCh38.p13	chr6:8054305-8054354
50045	FSIP1_01	FSIP1	FSIP1	XM_011521305.3,XM_011521306.2,NM_001324338.2,XM_017021972.2,XM_011521311.3,XM_011521307.3,XM_011521309.3,NM_152597.5	GRCh38.p13	chr15:39726747-39738129
35450	VGLL3_01	VGLL3	VGLL3	NM_016206.4,NM_001320494.2,NM_001320493.2,XM_006713138.4	GRCh38.p13	chr3:86968658-86968692
50839	RTN4RL1_01	RTN4RL1	RTN4RL1	NM_178568.4	GRCh38.p13	chr17:1935386-1935435
49349	MRAP2_01	MRAP2	MRAP2	XM_017010220.1,NM_001346543.2,NM_001346542.2,NM_138409.4,NM_001346544.1,NM_001346541.2	GRCh38.p13	chr6:84090224-84090273
51738	OR10J4_01	OR10J4	OR10J4	NR_145510.2,NM_001348286.2	GRCh38.p13	chr1:159433120-159433169,chr1:159433117-159433166
38311	CCHCR1_01	CCHCR1	CCHCR1	XM_017010965.1,XM_011514702.2,XM_017010961.1,XM_024446473.1,NM_019052.4,XM_017010966.1,NM_001105563.1,XM_017010967.1,XM_017010962.2,XM_011514705.1,XM_011514704.3,NM_001105564.1,XM_017010970.1,XM_017010963.1,XM_017010968.1,XM_011514703.1,XM_017010969.1,XM_017010964.1	GRCh38.p13	chr6:31150765-31150814
45497	IPCEF1_01	IPCEF1	IPCEF1	NM_001130699.1,NM_001130700.1,NM_015553.2	GRCh38.p13	chr6:154167926-154167975
46803	PSMG2_01	PSMG2	PSMG2	NM_147163.1,NM_020232.5	GRCh38.p13	chr18:12720580-12720629
40748	HDAC2_01	HDAC2	HDAC2	NM_001527.4,XM_017010799.1,NR_073443.1,NR_033441.2	GRCh38.p13	chr6:113948994-113949043
49849	PSMA1_01	PSMA1	PSMA1	NM_148976.2,NM_001143937.1,NM_002786.4	GRCh38.p13	chr11:14517659-14517708
39866	RBM10_01	RBM10	RBM10	XM_017029885.1,XM_024452460.1,XM_024452465.1,NM_005676.5,XM_024452464.1,XM_017029884.2,NM_001204467.2,XM_024452463.1,NM_001204468.1,NM_001204466.2,XM_024452457.1,XM_005272678.4,XM_005272677.4,XM_005272679.4,XM_024452462.1,XM_024452458.1,NM_152856.3,XM_024452459.1,XM_024452461.1	GRCh38.p13	chrX:47180294-47180437
35599	ANKRD36B_01	ANKRD36B	ANKRD36B	NM_001353337.2,XM_017004589.2,XM_017004585.2,XM_017004588.2,XM_017004584.2,XM_017004587.2,XR_922976.2,XM_017004594.2,XM_017004595.2,XM_011511556.2,XM_017004579.2,XR_002959321.1,XM_006712661.2,XM_011511555.2,XM_011511557.3,XM_017004592.2,NM_025190.3,XM_017004581.2,XM_017004593.2,XM_017004580.2,XM_017004590.2,XM_017004583.2,XM_017004582.2,XM_017004578.2,XM_024453026.1,XM_005263995.5,XR_001738869.2,…	GRCh38.p13	chr2:97589830-97589864
41939	ZNF124_01	ZNF124	ZNF124	NM_001297567.1,NM_003431.5,NM_001297568.1,NM_001297569.1,NM_001243740.2,XM_006711813.3,XM_005273257.4,XR_001737398.2	GRCh38.p13	chr1:247171886-247171923
38209	MYH2_01	MYH2	MYH2	NM_017534.6,NM_001100112.1	GRCh38.p13	chr17:10527037-10527768
37428	RCE1_01	RCE1	RCE1	NM_005133.3,NM_001032279.2	GRCh38.p13	chr11:66845891-66845940
47366	KLK14_01	KLK14	KLK14	NM_001311182.2,NM_022046.6,NR_163144.1,NM_001369775.2,XM_017026820.1	GRCh38.p13	chr19:51079673-51081549
44638	CYTH4_01	CYTH4	CYTH4	NM_013385.5,NM_001318024.2	GRCh38.p13	chr22:37296050-37297597
42740	SNAP29_01	SNAP29	SNAP29	NM_004782.4	GRCh38.p13	chr22:20870413-20870462
41933	ZNF35_01	ZNF35	ZNF35	NM_003420.4	GRCh38.p13	chr3:44660578-44660627
40362	MRAP_01	MRAP	MRAP	NM_001285394.2,NM_206898.1,NM_178817.4	GRCh38.p13	chr21:32293023-32293072
42652	RAB7A_01	RAB7A	RAB7A	NM_004637.6	GRCh38.p13	chr3:128797985-128798034
52079	TRAPPC2B_01	TRAPPC2B	ZNF547,TRAPPC2B	NM_173631.4,NM_001355204.2	GRCh38.p13	chr19:57363551-57363585
50411	SPRR4_01	SPRR4	SPRR4	NM_173080.3,XM_017000482.2	GRCh38.p13	chr1:152972244-152972293
34880	SH2D4A_01	SH2D4A	SH2D4A	NM_001174160.1,NM_001363111.1,NM_001363110.1,NM_001174159.1,NM_022071.4,NR_156444.1	GRCh38.p13	chr8:19333010-19333044
11426	BAGE3_01	BAGE3	KMT2C,LOC105378260,BAGE2,BAGE3	XM_017028520.1,XM_011516456.2,XM_017012481.1,XM_024446853.1,XM_017012480.1,XM_011516450.2,XM_024446852.1,XM_006716079.3,XM_006716078.3,XR_428183.3,XM_005250025.4,XR_001754956.1,XM_017012487.1,XM_017012486.1,XM_005250026.3,XM_011516453.2,XM_011516452.2,XM_005250031.4,NM_170606.3,XM_005250027.4,XM_005250028.4,XM_017012485.1,NM_182482.2,XM_017012488.1,XM_011516454.2,XM_017012484.1,NM_182481.1,XM_017…	GRCh38.p13	chr21:10482820-10482854,chr7:152238712-152238746
12862	PGAP6_01	PGAP6	PGAP6	XM_024450366.1,NM_021259.3	GRCh38.p13	chr16:372149-372183
48911	CARD9_01	CARD9	CARD9	NM_052813.5,NM_052814.4	GRCh38.p13	chr9:136369844-136370299
35590	ZNF850_01	ZNF850	ZNF850	NM_001267779.1,NM_001193552.2	GRCh38.p13	chr19:36749373-36749407
35307	AKAP6_01	AKAP6	AKAP6	XM_011537379.3,XM_024449755.1,XM_017021808.2,XM_024449754.1,XM_011537378.3,NM_004274.5,XM_011537383.3,XM_024449757.1,XM_017021811.2,XM_024449756.1	GRCh38.p13	chr14:32821930-32821967
38774	LIMS2_01	LIMS2	LIMS2	NM_017980.4,XM_006712627.4,NM_001161404.1,XM_017004469.1,XM_024452984.1,XM_024452985.1,NM_001161403.3,NM_001256542.1,XM_005263710.2,NM_001136037.3,XM_024452983.1,XM_024452986.1,XM_011511453.1	GRCh38.p13	chr2:127638484-127638523
50767	LHFPL1_01	LHFPL1	LHFPL1	XM_011530944.2,XM_011530943.2,XM_024452370.1,NM_178175.4,XM_017029485.1	GRCh38.p13	chrX:112660636-112660685
49760	FAM241B_01	FAM241B	FAM241B	XM_005269606.2,NM_145306.3,XM_017015836.1,XM_011539455.2,XM_005269608.3	GRCh38.p13	chr10:69633322-69633371
46389	PARVA_01	PARVA	PARVA	NM_018222.5,XM_005253015.3	GRCh38.p13	chr11:12504334-12504383
40169	ZNF728_01	ZNF728	ZNF728	NM_001267716.2	GRCh38.p13	chr19:23003109-23003158
40912	CDH5_01	CDH5	CDH5	XM_024450133.1,NM_001795.5,XM_011522801.2	GRCh38.p13	chr16:66404114-66404163
39730	HYDIN_01	HYDIN	HYDIN	XM_011523148.1,NM_001198542.1,XM_011523147.1,XM_011523151.2,NM_017558.5,NM_001198543.1,XM_011523146.2,NM_001270974.2,XM_006721206.3,XM_017023346.2	GRCh38.p13	chr16:71184958-71186777
34702	SCHIP1_01	SCHIP1	SCHIP1,IQCJ-SCHIP1	NM_001197107.1,NM_014575.3,NM_001197109.1,NM_001197108.1,NM_001197113.1,NM_001197114.1	GRCh38.p13	chr3:159888875-159888909
50698	NR2C2AP_01	NR2C2AP	NR2C2AP	NM_001300945.2,NM_176880.6	GRCh38.p13	chr19:19203025-19203074
43371	MPHOSPH10_01	MPHOSPH10	MPHOSPH10	NM_005791.3	GRCh38.p13	chr2:71144500-71148009
47373	ABHD4_01	ABHD4	ABHD4	XR_001750499.1,XR_245712.4,XM_005267986.4,NM_022060.2	GRCh38.p13	chr14:22609818-22609862
34865	NISCH_01	NISCH	NISCH	NM_001276294.2,XM_005264839.3,XR_001739989.1,NM_001276293.2,NM_007184.4,XM_017005643.2	GRCh38.p13	chr3:52478464-52478498
39588	CLDN24_01	CLDN24	CLDN22,CLDN24	NM_001111319.3,NM_001185149.1	GRCh38.p13	chr4:183322224-183322273,chr4:183320016-183320065
11727	CRTC3_01	CRTC3	CRTC3	XM_005254968.2,XM_024450018.1,NM_001042574.3,XM_024450019.1,NM_022769.5,XM_011521906.2	GRCh38.p13	chr15:90641143-90641180
40812	APOBEC1_01	APOBEC1	APOBEC1	NM_001304566.1,NM_001644.5,NM_005889.4	GRCh38.p13	chr12:7649497-7649546
41219	KRT32_01	KRT32	KRT32	NM_002278.3	GRCh38.p13	chr17:41459720-41459769
51367	TCF7_01	TCF7	TCF7	XR_948294.2,XM_011543613.3,XR_001742231.1,XM_006714684.2,XR_001742232.1,XM_006714686.4,NM_201632.5,XM_006714682.2,XM_011543604.2,NM_001346450.2,NR_033449.3,NM_201634.5,XM_011543606.1,XR_948292.1,NM_003202.5,NM_001366502.1,NM_001134851.4,NM_213648.5,XM_011543607.2,XM_006714685.4,XM_011543608.2,XM_011543609.2,XM_006714679.3,XM_006714678.3,NM_001346425.2,XM_017009790.1	GRCh38.p13	chr5:134142756-134142800
45962	CRK_01	CRK	CRK	NM_016823.4,NM_005206.5	GRCh38.p13	chr17:1422516-1422565
50758	SLC35B2_01	SLC35B2	SLC35B2	NM_178148.4,NM_001286513.1,NM_001286517.2,NM_001286512.1,NM_001286520.2,NM_001286509.2,NM_001286511.1,NM_001286510.2,NM_001286519.1	GRCh38.p13	chr6:44254884-44254931
42561	NRG1_01	NRG1	NRG1	NM_001322207.2,XM_017013367.1,XM_017013366.2,NM_001160002.2,NM_013960.5,XM_017013368.2,NM_013964.5,NM_001159999.3,NM_001322201.2,NM_001160001.3,NM_001160004.3,NM_013962.2,NM_001160005.1,NM_001322202.2,NM_004495.4,XM_024447143.1,NM_001159995.3,NM_013956.5,NM_001160007.2,XM_005273486.3,NM_013958.3,NM_001159996.2,NM_013957.5,NM_001160008.2,NM_013959.3,NM_001322197.2,XM_005273487.3,NM_001322205.2,XM_…	GRCh38.p13	chr8:32728000-32728049
49891	C12orf54_01	C12orf54	C12orf54	XM_011537896.2,XM_017018796.1,XM_005268636.3,NM_152319.4	GRCh38.p13	chr12:48486178-48486693
35139	RRM2_01	RRM2	RRM2	NR_164157.1,NM_001165931.1,NM_001034.4	GRCh38.p13	chr2:10126886-10126925
35811	PDHA1_01	PDHA1	PDHA1	NM_000284.4,NM_001173455.2,XM_017029574.2,NM_001173456.2,NM_001173454.2	GRCh38.p13	chrX:19358957-19359001
41089	GRB2_01	GRB2	GRB2	NM_203506.2,NM_002086.5	GRCh38.p13	chr17:75332771-75393573
40438	CNGB1_01	CNGB1	CNGB1	XM_011522870.2,NM_001297.5,NM_001286130.2	GRCh38.p13	chr16:57901378-57901427
47754	ABHD8_01	ABHD8	ABHD8	NM_024527.5	GRCh38.p13	chr19:17294787-17294836
37842	FAM222B_01	FAM222B	FAM222B	XM_011524987.1,NM_001288635.2,NM_001288631.2,XM_011524988.2,NM_001288640.2,NM_001288636.2,NM_001288632.2,NM_001288637.2,XM_017024835.2,NM_018182.4,NM_001288633.2,NM_001288638.2,NM_001077498.3,NM_001288634.2,NM_001288639.2,XM_011524986.2	GRCh38.p13	chr17:28758211-28758260
45631	NDUFA13_01	NDUFA13	NDUFA13	NM_015965.7	GRCh38.p13	chr19:19526234-19527295
40048	ZNF444_01	ZNF444	ZNF444	XM_005259035.1,XM_017026932.1,XM_011527073.1,XM_024451574.1,XM_024451575.1,XM_011527068.1,XM_005259036.1,XM_011527069.1,XM_017026933.1,XM_011527071.1,NM_001253792.2,XM_024451573.1,NM_018337.4,XM_011527070.1,XM_005259034.2,XM_024451576.1	GRCh38.p13	chr19:56160321-56160370
43144	YES1_01	YES1	YES1	XM_024451245.1,XM_017025960.2,XM_024451246.1,NM_005433.4,XM_024451247.1,XM_005258139.4,XM_024451243.1,XM_024451244.1	GRCh38.p13	chr18:756684-756733
45656	RDH11_01	RDH11	RDH11	NM_016026.4,NM_001252650.2	GRCh38.p13	chr14:67685124-67685173
35227	SLC25A14_01	SLC25A14	SLC25A14	NM_001282198.1,XM_017029938.2,XM_005262489.5,XM_011531402.2,XM_017029942.1,XM_017029936.2,XM_017029943.1,NM_001282196.2,XM_024452474.1,NR_104107.2,NM_001282197.1,XM_017029940.1,NM_001282195.2,XM_017029941.1,XM_017029937.1,XM_017029939.2	GRCh38.p13	chrX:130358649-130358683
40890	CD1C_01	CD1C	CD1C	XM_005245579.5,NM_001765.3	GRCh38.p13	chr1:158292214-158292263
50491	STK32C_01	STK32C	STK32C	XM_024447947.1,NM_173575.4,NM_001318878.2,XR_945687.2,XM_011539693.2,NM_001318879.1,XM_024447948.1,NR_134911.1,XM_024447949.1,XM_011539688.1,XM_011539696.1,XM_011539690.2,XM_011539694.1,XM_011539695.1	GRCh38.p13	chr10:132209053-132209295,chr10:132209053-132222641
37248	SERBP1_01	SERBP1	SERBP1	NM_001018067.2,NM_001018068.2,NM_015640.4,NM_001018069.2	GRCh38.p13	chr1:67415311-67420029
36285	PTGFR_01	PTGFR	PTGFR	NM_000959.4,XR_001737338.1,XM_017001873.1,NM_001039585.2,XR_946715.2	GRCh38.p13	chr1:78492923-78492972
39452	TRIQK_01	TRIQK	TRIQK	XM_024447136.1,NM_001191036.2,XM_017013350.1,NM_001171796.2,NM_001191035.2,NM_001171797.2,NM_001171795.2,XM_017013347.1,NM_001171798.2,NM_001171799.1,XM_017013349.1	GRCh38.p13	chr8:92884166-92884215
51717	C13orf42_01	C13orf42	C13orf42	XM_024449398.1,NR_102431.2,NM_001351589.1,NR_102432.2	GRCh38.p13	chr13:51084093-51084141
39522	PPP2R2A_01	PPP2R2A	PPP2R2A	XM_024447186.1,XM_024447187.1,NM_002717.4,XM_011544565.1,XM_005273560.1,XM_005273559.1,XR_949430.3,XM_011544568.1,XM_011544566.1,XM_011544569.1,NM_001177591.2,XR_002956638.1,XM_011544567.2	GRCh38.p13	chr8:26370983-26371032
41708	SLN_01	SLN	SLN	NM_003063.3	GRCh38.p13	chr11:107707680-107707724
49911	CLDND2_01	CLDND2	CLDND2	XM_011526428.2,XM_017026244.1,XM_017026245.1,NM_152353.3,XM_017026246.1,XM_017026247.1,XM_011526425.2	GRCh38.p13	chr19:51367503-51367552
40316	SNRPD3_01	SNRPD3	SNRPD3	NM_004175.5,NM_001278656.1,NR_103819.1	GRCh38.p13	chr22:24557725-24557774
37711	PREPL_01	PREPL	PREPL	NM_001171613.2,NM_001042385.2,XM_017005385.1,NM_001171617.1,NM_001171606.1,NM_006036.4,NM_001042386.2,NM_001171603.1,NM_001374275.1,XM_017005384.1,NM_001374276.1,NM_001374277.1	GRCh38.p13	chr2:44326802-44326851
46272	KDM4D_01	KDM4D	KDM4D	NM_018039.3	GRCh38.p13	chr11:94974041-94975675
40304	ZNF518A_01	ZNF518A	ZNF518A	NM_014803.4,NM_001330738.1,NM_001330732.2,XM_024448265.1,NM_001278525.1,XM_024448268.1,XM_017016989.1,XM_024448269.1,XM_011540418.2,NM_001330733.1,XM_024448266.1,NM_001278524.2,XM_011540410.2,XM_011540415.2,NM_001330735.1,NM_001330734.1,XM_017016992.1,NM_001330737.1,XM_011540412.2,NM_001330736.1,XM_011540413.3,NM_001278526.2,XM_011540419.2,XM_011540406.2,XM_017016999.1,XM_017016998.1,XM_017016986…	GRCh38.p13	chr10:96159802-96159851
47664	NOC4L_01	NOC4L	NOC4L	XR_944714.2,XM_017019960.1,NM_024078.3	GRCh38.p13	chr12:132152166-132152287
48988	C8orf34_01	C8orf34	C8orf34	XR_928756.3,NR_146186.1,NR_146187.1,NM_001195639.2,NM_052958.4,XM_011517450.2,NM_001349478.1,NM_001349479.1,NM_001349480.1,XM_011517449.2,NM_001349476.1,NM_001349477.1	GRCh38.p13	chr8:68439563-68439612
50296	CPNE9_01	CPNE9	CPNE9	XR_002959492.1,XR_001740032.1,NM_153635.3,XM_011533388.2,XM_011533389.2,NM_001308388.2,XM_011533386.2,XM_017005747.1	GRCh38.p13	chr3:9704960-9705478
43123	RALA_01	RALA	RALA	XM_011515466.1,XM_006715762.3,NM_005402.4	GRCh38.p13	chr7:39706553-39706602
51412	NOTCH2NLA_01	NOTCH2NLA	NOTCH2NLC,NOTCH2NLB,NOTCH2NLA	NM_203458.4,NM_001364012.2,NM_001364008.1,XM_006711700.4,NM_001364006.1,NM_001364007.2	GRCh38.p13	chr1:146154244-146154293,chr1:148605174-148605223,chr1:149466013-149466062
52092	VTI1B_01	VTI1B	VTI1B	NM_006370.3	GRCh38.p13	chr14:67659835-67659870
45984	APLN_01	APLN	APLN	NM_017413.5	GRCh38.p13	chrX:129647543-129647588
44963	SLC2A8_01	SLC2A8	SLC2A8	XR_002956777.1,XR_929783.2,XM_011518604.3,NM_001271712.1,XM_006717084.3,NM_001271711.1,NR_073416.1,NM_014580.5,XM_017014653.1,XM_024447526.1,XM_011518602.2,XM_011518603.3	GRCh38.p13	chr9:127407598-127407647
40875	CALCR_01	CALCR	CALCR	NM_001742.4,NM_001164737.2,NM_001164738.1	GRCh38.p13	chr7:93426362-93426411
48552	ARHGAP9_01	ARHGAP9	ARHGAP9	NM_001367424.1,NM_001367423.1,XM_005269084.2,XR_001748843.1,NM_001080156.3,XM_005269085.2,NM_032496.4,XR_001748841.1,XR_001748840.1,XM_005269083.2,NM_001319852.2,XM_017019800.1,NM_001319851.2,XM_011538657.2,NM_001319850.2,XM_011538656.2,XM_011538658.2,NM_001367425.1,NM_001367426.1,XR_001748842.1,XM_011538659.2,NM_001080157.2,NM_001367422.1	GRCh38.p13	chr12:57472372-57472421
45954	GDE1_01	GDE1	GDE1	NM_001324067.2,NM_016641.4,NR_136689.2,NM_001324066.2	GRCh38.p13	chr16:19517089-19517138
47714	FSD1_01	FSD1	FSD1	NM_001330429.1,NM_024333.3	GRCh38.p13	chr19:4323376-4323420
45406	R3HDM1_01	R3HDM1	R3HDM1	XM_017003725.2,NM_015361.4,NM_001282798.2,XM_011510871.1,XM_017003719.1,NM_001354200.2,XM_017003721.1,XM_005263628.3,XM_005263629.3,XM_011510876.2,NM_001282800.2,XM_005263626.3,NM_001378107.1,XM_017003736.1,XR_001738685.1,XM_017003735.2,XM_017003720.1,XM_017003734.1,XM_017003731.1,XM_017003730.2,XR_001738687.1,XR_001738683.1,XM_017003733.1,NM_001354199.2,XR_001738684.1,XM_011510881.1,XM_017003728…	GRCh38.p13	chr2:135638620-135638752
43147	MLF2_01	MLF2	MLF2	NM_005439.2,NM_001382226.1,NM_001382225.1	GRCh38.p13	chr12:6752007-6752286
40657	DNAH5_01	DNAH5	DNAH5	XM_017009179.2,NM_001369.3,XM_005248262.3,XM_017009184.1,XM_024454389.1,XM_017009185.1,XM_017009180.1,XR_001742034.1,XM_017009181.1,XR_001742035.1,XM_017009177.1,XM_017009178.1,XM_024454388.1,XM_017009187.1,XM_017009182.1,XM_017009183.1	GRCh38.p13	chr5:13859529-13859578
52004	NOP16_01	NOP16	NOP16	NM_001256540.4,NM_001256539.3,NM_016391.8,NM_001291305.3,NR_134316.2,NM_001291308.3,XM_011534567.1,NM_001291307.3,NR_134318.2,NM_001317975.2	GRCh38.p13	chr5:176388303-176388337
37895	DMP1_01	DMP1	DMP1	XM_011531706.2,NM_001079911.3,NM_004407.4,XM_011531705.2	GRCh38.p13	chr4:87656524-87657058
37912	ZNF99_01	ZNF99	ZNF99	NM_001080409.3	GRCh38.p13	chr19:22755861-22755910
48650	TRIM52_01	TRIM52	TRIM52	XM_017009991.2,NM_001346051.2,NM_001346050.2,NM_001346048.2,NM_032765.4,NM_001346049.2	GRCh38.p13	chr5:181260521-181260570
48201	VMP1_01	VMP1	VMP1	NM_001329395.2,NM_001329401.2,NM_001329400.2,NM_001329396.2,NM_030938.5,NM_001329397.2,NM_001329399.2,NM_001329402.2,NM_001329398.2,NM_001329394.2	GRCh38.p13	chr17:59773879-59808838
46038	NAGK_01	NAGK	NAGK	NM_017567.6,NM_001330425.3,XM_011532957.1,XR_939694.1,NM_001365466.2,NM_001330426.2,XM_017004440.1	GRCh38.p13	chr2:71078479-71078528
35798	NF1_01	NF1	NF1	NM_001042492.3,NM_000267.3,NM_001128147.3	GRCh38.p13	chr17:31181760-31182529
50560	KRTCAP2_01	KRTCAP2	KRTCAP2	NM_173852.4	GRCh38.p13	chr1:155172741-155172787
43204	IFI27_01	IFI27	IFI27	NM_001288995.2,NM_001366993.1,NM_001288960.2,NM_001288959.2,NM_001288954.2,NM_001366994.1,NM_001288958.2,NM_001130080.3,NM_005532.5,NM_001288957.2,NM_001288952.2,NM_001288956.2	GRCh38.p13	chr14:94116485-94116531,chr14:94116476-94116522
42787	ATG5_01	ATG5	ATG5	NM_004849.4,NR_104403.1,NM_001286106.1,XR_001743757.2,NR_104402.1,NM_001286108.1,NM_001286111.1,NM_001286107.1,XM_024446590.1	GRCh38.p13	chr6:106186517-106186566
40773	TNFRSF9_01	TNFRSF9	TNFRSF9	NM_001561.6,XM_006710618.3	GRCh38.p13	chr1:7938312-7938751
43413	FSTL3_01	FSTL3	FSTL3	NM_005860.3	GRCh38.p13	chr19:677949-680286
41317	MSH3_01	MSH3	MSH3	NM_002439.5	GRCh38.p13	chr5:80778754-80778803
45209	KDM1A_01	KDM1A	KDM1A	XM_017000716.1,XM_017000717.1,NM_001009999.3,NM_015013.4,XM_006710474.3,NM_001363654.2,XM_005245786.2,XM_006710473.3	GRCh38.p13	chr1:23082240-23082289
45828	TACO1_01	TACO1	TACO1	NM_016360.4	GRCh38.p13	chr17:63607297-63607346
35386	MRPL57_01	MRPL57	MRPL57	NM_024026.5,XM_017020740.2	GRCh38.p13	chr13:21177048-21177082
35842	PITX2_01	PITX2	PITX2	NM_000325.6,XM_024454090.1,NM_001204399.1,NM_153427.2,NM_001204398.1,NM_001204397.1,NM_153426.2	GRCh38.p13	chr4:110618259-110618306
45055	RASSF2_01	RASSF2	RASSF2	XM_005260895.3,XM_017028153.1,XM_011529411.1,XM_011529410.1,XM_017028149.1,NM_014737.3,XM_017028150.1,XM_017028151.1,XM_011529412.2,NM_170774.1,XM_017028152.1	GRCh38.p13	chr20:4782130-4782179
42231	CDKL2_01	CDKL2	CDKL2	XR_001741345.1,XM_017008809.1,NM_003948.5,NM_001330724.2,XM_017008811.1,XR_001741344.1,XM_017008810.1,XM_006714406.2	GRCh38.p13	chr4:75605582-75605631
42102	EIF3A_01	EIF3A	EIF3A	NM_003750.4	GRCh38.p13	chr10:119049955-119050539
52010	NUTM2F_01	NUTM2F	NUTM2F,NUTM2G	NM_001170741.3,NM_017561.2,NM_001045477.4	GRCh38.p13	chr9:94325533-94325567,chr9:96932089-96932123
44929	RPS6KA6_01	RPS6KA6	RPS6KA6	XM_017029426.1,XM_017029423.2,XM_011530920.2,NM_014496.5,XM_011530917.2,XM_017029425.1,XM_017029424.1,XM_011530919.2,NM_001330512.1	GRCh38.p13	chrX:84064295-84064342
38195	NXF2_01	NXF2	NXF2B,NXF2	NM_022053.4,NM_001099686.2	GRCh38.p13	chrX:102438660-102439904,chrX:102247204-102248451
50594	SPATA19_01	SPATA19	SPATA19	NM_174927.3,NM_001291992.2,XR_947807.1,XR_947806.1	GRCh38.p13	chr11:133845140-133845189
39417	ZNHIT6_01	ZNHIT6	ZNHIT6	XR_001737245.2,XM_024447736.1,NM_001170670.1,NM_017953.4,XR_001737244.2	GRCh38.p13	chr1:85653413-85653462
35101	TNK2_01	TNK2	TNK2	XM_024453291.1,NM_001010938.2,NM_001308046.1,XM_005269274.3,XM_005269275.3,NM_001382273.1,NM_005781.5,NM_001382272.1,XM_011512317.3,XM_011512321.2,XM_024453292.1,XM_024453293.1,XM_017005509.1,XM_024453295.1,NM_001382275.1,NM_001382274.1,NM_001382271.1,XM_011512318.2,XM_024453294.1	GRCh38.p13	chr3:195867654-195867688
49719	CTU1_01	CTU1	CTU1	NM_145232.4	GRCh38.p13	chr19:51104273-51104309
37001	SERP2_01	SERP2	SERP2	XM_024449351.1,XM_024449348.1,NR_144535.1,XM_024449349.1,NM_001010897.3,NM_001346980.1,XM_024449352.1	GRCh38.p13	chr13:44397531-44397576
39968	C2orf91_01	C2orf91	C2orf91	NR_161189.1	GRCh38.p13	chr2:41937069-41937118
49614	SPEF2_01	SPEF2	SPEF2	XM_011514141.3,XM_011514137.3,XR_001742273.2,XR_925656.3,XM_011514140.2,XM_005248378.4,XM_017009882.2,XM_024446219.1,XM_005248377.4,XM_011514138.3,XM_017009880.2,XM_011514136.3,XM_011514139.3,NM_024867.4,XR_925655.2,XM_017009881.2,NM_144722.4,XM_011514135.3,XM_005248376.4	GRCh38.p13	chr5:35641474-35641523
41651	SCNN1D_01	SCNN1D	SCNN1D	NR_037668.2,NM_001130413.4	GRCh38.p13	chr1:1291086-1291122
38231	MROH6_01	MROH6	MROH6	XM_011517223.1,XM_011517214.1,XM_011517222.1,XM_011517215.1,NM_001100878.2,XM_011517218.1,XM_011517221.2,XM_011517216.2,XM_011517217.1	GRCh38.p13	chr8:143566338-143566372
51363	SLC16A13_01	SLC16A13	SLC16A13	NM_201566.3	GRCh38.p13	chr17:7036430-7036479
46561	SLC35E3_01	SLC35E3	SLC35E3	NR_149144.3,NR_149143.3,NM_018656.5,NM_001354997.3,NM_001354998.2	GRCh38.p13	chr12:68752149-68759164
41035	FGF4_01	FGF4	FGF4	NM_002007.4	GRCh38.p13	chr11:69774049-69774096
51315	CARM1_01	CARM1	CARM1	NM_199141.2,NM_001370089.1,NM_001370088.1,XM_011527638.2	GRCh38.p13	chr19:10919664-10919909
47518	MFSD1_01	MFSD1	MFSD1	NM_001167903.2,NM_001289406.2,NM_001289407.2,XM_006713730.2,NM_022736.4,NR_110328.2	GRCh38.p13	chr3:158822054-158822103
37250	NR3C1_01	NR3C1	NR3C1	NM_001018077.1,NM_001364185.1,NM_001204258.2,NM_001018076.2,NM_001364184.2,NM_001018075.1,NM_001204261.2,NM_001018074.1,NM_001204260.2,NM_001020825.2,XM_005268423.3,XM_005268422.3,NM_001204263.2,NM_001024094.2,NM_001204262.2,XM_011537637.3,NR_157096.2,NM_001204259.2,NM_001364181.2,NM_001364180.2,NM_000176.3,NM_001364183.2,NM_001204265.2,NM_001364182.1,NM_001204264.2	GRCh38.p13	chr5:143295555-143298681
49773	SPESP1_01	SPESP1	SPESP1	NM_145658.4	GRCh38.p13	chr15:68946001-68946050
40002	CLCN3_01	CLCN3	CLCN3	XM_005262726.3,XM_011531586.2,NM_001243374.1,NM_173872.4,NM_001829.4,NM_001243372.2	GRCh38.p13	chr4:169689121-169689170
51518	TOMM20L_01	TOMM20L	TOMM20L	XM_011536742.3,XM_011536744.3,NM_207377.3,XM_011536743.2	GRCh38.p13	chr14:58407402-58407451
11601	CDH17_01	CDH17	CDH17	NM_001144663.2,NM_004063.4,XM_011516790.1	GRCh38.p13	chr8:94160125-94160159
13728	ZNF579_01	ZNF579	ZNF579	XM_017026410.2,NM_152600.3,XM_017026409.2,XM_017026411.2	GRCh38.p13	chr19:55578015-55578051
39265	TWNK_01	TWNK	TWNK	NR_160742.1,NR_160741.1,NR_160739.1,NR_160738.1,NM_001368275.1,NM_001163812.2,NM_021830.5,NM_001163813.2,NM_001163814.2,NR_160740.1	GRCh38.p13	chr10:100989749-100989783
51591	MOBP_01	MOBP	MOBP	NM_001278323.2,NR_103505.2,NM_001278322.2,NR_103504.2,NM_182935.4,NR_003090.3	GRCh38.p13	chr3:39502123-39502161
48509	PRAC1_01	PRAC1	PRAC1	NM_032391.3	GRCh38.p13	chr17:48721838-48721887
36541	LINGO4_01	LINGO4	LINGO4	NM_001004432.4	GRCh38.p13	chr1:151800530-151800579
49277	SAT2_01	SAT2	SAT2	NM_001320847.2,NM_133491.5,XM_017024074.1,NM_001320845.1,XM_017024073.1,NM_001320846.1	GRCh38.p13	chr17:7627220-7627391
36549	OR1N2_01	OR1N2	OR1N2	NM_001004457.2	GRCh38.p13	chr9:122553994-122554043
35040	TMEM201_01	TMEM201	TMEM201	NM_001010866.4,XM_011540910.2,XM_017000552.2,XR_244785.3,NM_001130924.3,XM_017000549.1,XM_017000550.1,XM_017000551.2,XM_006710417.3	GRCh38.p13	chr1:9598515-9598549
51167	LYSMD3_01	LYSMD3	LYSMD3	NM_198273.2,XM_005248421.4,NM_001286812.1	GRCh38.p13	chr5:90517568-90517617
40586	DAPK3_01	DAPK3	DAPK3	NM_001348.3,NM_001375658.1	GRCh38.p13	chr19:3964370-3964667
38547	AEBP1_01	AEBP1	AEBP1	NM_001129.5,XM_011515162.1	GRCh38.p13	chr7:44113661-44113699
39495	TXNRD3_01	TXNRD3	TXNRD3	NM_001173513.2,NM_052883.2	GRCh38.p13	chr3:126633922-126633971
50313	STKLD1_01	STKLD1	STKLD1	NM_153710.5,NR_103997.2	GRCh38.p13	chr9:133405473-133405522
50780	PAQR7_01	PAQR7	PAQR7	XM_005245746.3,XM_011540862.2,NM_178422.6,XM_011540861.1	GRCh38.p13	chr1:25863242-25863291
51810	XKR9_01	XKR9	XKR9	XM_011517525.2,XM_006716447.4,NM_001011720.2,XM_011517526.3,XM_011517527.3,NM_001287258.2,NM_001287259.2,XM_017013404.2,XM_011517524.3,NM_001287260.2,XM_017013405.2	GRCh38.p13	chr8:70707058-70707107
11685	COL18A1_01	COL18A1	COL18A1	NM_130444.3,NM_130445.4,NM_030582.4,NM_001379500.1	GRCh38.p13	chr21:45468335-45468369
48463	HAGHL_01	HAGHL	HAGHL	XM_011522712.1,XM_005255631.4,NM_001323635.2,NM_032304.4,NM_001365282.1,NM_001290139.2,NM_001290137.2,NM_001323636.2,XM_005255632.1	GRCh38.p13	chr16:728223-728339
35312	ADGRB2_01	ADGRB2	ADGRB2	XR_001737343.1,XM_017001905.1,XM_017001902.1,XM_017001903.1,XM_017001900.1,XM_017001901.1,XM_017001911.1,NM_001364857.2,XM_017001910.1,XM_017001908.1,XM_017001909.1,XM_011541858.2,XM_017001912.1,XM_017001906.1,XM_017001907.1,NM_001294336.2,XM_011541848.3,XM_011541849.2,XM_017001904.1,NM_001294335.2,XM_024448673.1,XM_017001899.1	GRCh38.p13	chr1:31739328-31739365
51515	SH2D4B_01	SH2D4B	SH2D4B	XM_017016236.1,NM_207372.2,NM_001145719.1	GRCh38.p13	chr10:80644256-80644305
39001	PLET1_01	PLET1	PLET1	NM_001145024.1	GRCh38.p13	chr11:112248594-112248643
13218	SHB_01	SHB	SHB	NM_003028.3	GRCh38.p13	chr9:37948667-37948701
35432	AP1G2_01	AP1G2	AP1G2	NM_001354681.2,XM_024449738.1,XM_005268175.3,NM_001354673.2,XM_005268174.3,XM_017021742.2,XR_001750590.2,XM_005268173.3,NM_001354674.2,XM_005268172.3,NM_001354675.2,NR_148937.2,NR_148938.2,XM_006720301.3,NM_003917.5,XM_005268170.3,XR_002957569.1,XR_001750587.1,XR_001750586.1,XM_017021740.1,XR_002957568.1,XM_017021741.1,XR_001750584.2,XM_005268169.3,XR_002957567.1,NM_001354677.2,XR_001750589.1,XR_…	GRCh38.p13	chr14:23564102-23564136
44467	NTSR2_01	NTSR2	NTSR2	XM_006711877.3,XM_006711876.4,XM_005246156.3,XM_017003738.1,NM_012344.4	GRCh38.p13	chr2:11660049-11660083
42534	ACSL4_01	ACSL4	ACSL4	XM_005262109.2,XM_006724635.2,NM_004458.3,XM_024452351.1,XM_011530888.2,XM_011530889.2,NM_001318510.2,NM_001318509.2,NM_022977.2	GRCh38.p13	chrX:109683195-109683244
49895	AK7_01	AK7	AK7	NM_001350892.2,XM_006720021.2,NM_152327.5,XM_017020960.1,NM_001350890.2,XM_017020958.1,NM_001350891.2,NM_001350888.2,XM_006720022.2	GRCh38.p13	chr14:96437878-96442741
36259	PGR_01	PGR	PGR	NR_073143.2,NR_073142.2,XM_011542869.2,NM_001202474.3,NM_001271161.2,XM_006718858.3,NR_073141.2,NM_000926.4,NM_001271162.2	GRCh38.p13	chr11:101126097-101126146
35099	LRP11_01	LRP11	LRP11	XR_942605.3,NM_032832.6,XM_017011380.2,XR_001743696.2,XM_011536194.3	GRCh38.p13	chr6:149853042-149853076
44144	KPTN_01	KPTN	KPTN	XR_001753597.1,NM_007059.4,XM_024451333.1,XM_017026226.1,XM_017026228.1,XM_017026227.1,NR_111923.2,NM_001291296.2	GRCh38.p13	chr19:47475215-47475264
46684	PLEKHA3_01	PLEKHA3	PLEKHA3	XM_011511689.3,NM_019091.4	GRCh38.p13	chr2:178490660-178490709
48281	CCDC3_01	CCDC3	CCDC3	NM_031455.4,NM_001282658.2	GRCh38.p13	chr10:12897163-12897212
44500	PRDM4_01	PRDM4	PRDM4	XM_005268593.1,NM_012406.4,XM_024448807.1,XR_001748563.1,XR_001748564.1	GRCh38.p13	chr12:107752053-107752102
42401	JMJD1C_01	JMJD1C	JMJD1C	XM_017015898.1,NM_032776.3,XM_017015897.1,XM_017015902.1,NM_001322254.2,XM_017015903.1,XM_011539503.1,NM_001322252.2,XM_024447883.1,NM_001322258.2,NM_001318154.2,XM_024447882.1,XM_017015901.1,NM_001318153.2,XM_017015900.1,NM_001282948.1,XM_017015899.1,XM_011539508.2,NR_134512.1	GRCh38.p13	chr10:63209097-63209146
41328	MTRR_01	MTRR	MTRR	XR_001742071.1,NM_024010.4,XR_001742072.1,XM_024446064.1,XR_001742077.1,XR_001742076.1,XR_001742074.1,XR_001742075.1,NR_134482.2,NM_002454.3,NM_001364440.2,NR_134480.2,NR_157169.2,NM_001364441.2,NR_134481.2,NR_157168.2,NM_001364442.2,NR_157173.2,NR_157170.2,NR_157175.2,NR_157171.2,NR_157174.2,NR_157172.2,NR_157177.2,NR_157178.2,NR_157176.2	GRCh38.p13	chr5:7875344-7877961
42765	ARHGAP29_01	ARHGAP29	ARHGAP29	NM_001328667.2,NM_004815.4,NM_001328664.2,NM_001328665.2,XM_011542439.2,NM_001328666.2	GRCh38.p13	chr1:94173964-94174010
41635	RPS27A_01	RPS27A	RPS27A	NM_002954.6,NM_001135592.2,NM_001177413.1	GRCh38.p13	chr2:55235486-55235535
41246	LMX1B_01	LMX1B	LMX1B	NM_001174146.2,NM_001174147.2,NM_002316.4	GRCh38.p13	chr9:126697703-126697752
49679	UBQLNL_01	UBQLNL	UBQLNL	NM_145053.5	GRCh38.p13	chr11:5515351-5515400
34687	HSD17B1_01	HSD17B1	HSD17B1	NM_001330219.3,NR_144397.2,NM_000413.4	GRCh38.p13	chr17:42553207-42553241
37844	TAC4_01	TAC4	TAC4	NM_001077504.1,NM_001077503.1,NM_001077506.1,NM_001077505.1,NM_170685.2	GRCh38.p13	chr17:49838545-49838579
49715	VTI1A_01	VTI1A	VTI1A	NM_001365713.1,NM_001365712.1,NM_001318205.1,NM_145206.4,NM_001318203.1,NM_001365714.1,NM_001365711.1,NM_001365710.2	GRCh38.p13	chr10:112668267-112668950
39639	SUGCT_01	SUGCT	SUGCT	XM_011515527.3,XM_006715775.3,XM_011515530.3,NM_024728.3,XM_011515528.3,XM_011515529.3,NM_001193311.2,XM_017012621.1,XM_011515525.3,NM_001193312.2,XM_017012622.2,XM_011515526.2,NM_001193313.2	GRCh38.p13	chr7:40180984-40181989
50316	C10orf67_01	C10orf67	C10orf67	NM_001351306.2,XM_011519441.1,XM_011519445.2,XM_011519440.1,NM_001365862.2,NM_001371909.1,NM_153714.3,XM_017016031.1,XR_001747077.2,XM_011519442.2,XM_011519446.1,XR_930487.1,XR_930488.1	GRCh38.p13	chr10:23320775-23322402
45061	KIAA0586_01	KIAA0586	KIAA0586	NM_001329947.2,NM_001329943.3,NM_001244189.2,XM_024449784.1,NM_001329944.2,XM_024449785.1,NM_001364701.2,XM_024449789.1,NM_001364700.1,XM_024449791.1,NM_001244191.1,NM_001244190.2,XM_024449788.1,XM_024449779.1,XM_024449782.1,XM_024449783.1,XM_024449780.1,XM_024449781.1,XM_024449787.1,NM_014749.5,NM_001329945.2,NM_001244193.1,NM_001329946.2,NM_001244192.2	GRCh38.p13	chr14:58467771-58467820
38018	DNLZ_01	DNLZ	DNLZ	NR_073565.2,NM_001080849.3	GRCh38.p13	chr9:136362159-136363009
35439	TMEM94_01	TMEM94	TMEM94	XM_017025444.1,XM_017025436.1,XM_017025437.1,XM_011525520.2,XM_017025447.1,XR_001752706.1,XM_017025446.1,XM_017025443.1,XM_017025438.1,XM_017025442.1,XM_017025439.1,NM_014738.6,XM_017025441.1,XM_017025440.2,NM_001321148.2,NM_001321149.2,XM_005257864.2,XM_011525521.1,XM_017025433.1,XM_011525519.1,XM_011525515.1,XM_017025450.1,XM_017025434.1,NM_001351202.2,XM_017025435.1,XM_011525516.1,NM_001351203…	GRCh38.p13	chr17:75493739-75493773
12736	NUDT18_01	NUDT18	NUDT18	XM_011544650.1,NM_024815.4	GRCh38.p13	chr8:22107455-22107493
45495	OSBPL3_01	OSBPL3	OSBPL3	XR_428074.3,XM_006715684.4,XM_006715682.3,NR_104112.1,XM_017011948.1,NM_145322.2,XM_011515258.2,NM_145321.2,XM_011515259.2,NR_104111.1,XM_006715681.3,NM_015550.4,XR_428075.3,XM_005249698.3,XM_017011949.1,NM_145320.2,XR_001744620.1,XR_926927.2,XR_428073.3,XR_926929.1,XM_006715683.3	GRCh38.p13	chr7:24892539-24892588
51139	CD247_01	CD247	CD247	NM_198053.3,NM_001378515.1,XM_011510145.1,XM_011510144.2,NM_001378516.1,NM_000734.4	GRCh38.p13	chr1:167430760-167430809
50074	ARID2_01	ARID2	ARID2	XM_011538025.1,XM_006719272.4,NM_001347839.1,NM_152641.4,XR_944505.3	GRCh38.p13	chr12:45851529-45851578
38508	PAK3_01	PAK3	PAK3	XM_017029557.1,XM_005262133.3,NM_001324330.2,XM_011530962.1,XM_005262132.2,NM_001324331.2,NM_001128167.2,NM_001324327.2,NM_001128166.2,XM_011530971.2,NM_001128172.2,NM_001128173.3,NM_001324328.2,NR_136745.2,XM_011530969.1,XM_017029558.1,NR_136744.2,XM_011530968.2,NM_001128168.3,NM_001324325.2,XM_011530967.2,XM_017029562.1,XM_006724654.2,XM_017029563.1,XM_006724655.2,NM_001324334.2,NM_001324326.2,…	GRCh38.p13	chrX:111123145-111123194
34458	NIPSNAP3A_01	NIPSNAP3A	NIPSNAP3A	NM_015469.3,NM_001329570.2	GRCh38.p13	chr9:104747794-104747828
47069	DTX2_01	DTX2	DTX2	XM_017011723.1,XM_005250132.2,XM_017011726.2,NM_020892.2,XM_011515773.2,NM_001102596.2,NM_001102594.1,XM_024446649.1,XM_011515772.1,XM_017011725.1,NM_001102595.1,XM_017011724.1,XM_005250131.2,XM_011515774.1,XM_024446651.1,XM_024446650.1,XM_017011727.1,XM_011515775.1	GRCh38.p13	chr7:76505803-76505839
45006	SLC25A44_01	SLC25A44	SLC25A44	XM_024451071.1,NM_001377388.1,NM_001377390.1,NR_104408.2,NM_001286184.2,NM_001377387.1,NM_001377386.1,NR_104411.2,XM_011510181.2,XM_011510180.1,NM_014655.4,NR_104412.2,NM_001377385.1,NM_001377389.1	GRCh38.p13	chr1:156211925-156211974
40550	MEI4_01	MEI4	MEI4	XM_005248774.4,XM_017010155.1,NM_001322247.2,NM_001282136.2	GRCh38.p13	chr6:77761199-77761248
49227	WFDC8_01	WFDC8	WFDC8	NM_130896.3,XM_017028119.1,NM_181510.3	GRCh38.p13	chr20:45552116-45552165
34897	ZNF488_01	ZNF488	ZNF488	NM_001346932.2,NM_001346933.2,XM_024447789.1,XM_006717617.3,XM_017015643.1,NM_001346935.2,NM_001346934.2,NM_153034.4,NM_001346936.2,XM_011539244.2	GRCh38.p13	chr10:47368707-47368741
45184	BAHD1_01	BAHD1	BAHD1	XM_011521367.3,XM_011521366.2,NR_125372.2,XM_011521369.3,XM_011521368.2,NM_001301132.2,NM_014952.5	GRCh38.p13	chr15:40467001-40467050
45715	RAB10_01	RAB10	RAB10	NM_016131.5,XM_024452565.1	GRCh38.p13	chr2:26137312-26137361
40852	CFB_01	CFB	CFB	NM_001710.6	GRCh38.p13	chr6:31950746-31950890
43230	LGALS3BP_01	LGALS3BP	LGALS3BP	NM_005567.4	GRCh38.p13	chr17:78971720-78971762
11845	DUSP1_01	DUSP1	DUSP1	NM_004417.4	GRCh38.p13	chr5:172769016-172769053
51819	RNF222_01	RNF222	RNF222	XM_011523981.3,XM_011523979.3,NM_001146684.3,XM_011523980.3,XM_011523978.3	GRCh38.p13	chr17:8393305-8393339
36210	HPGD_01	HPGD	HPGD	NM_000860.6,NM_001256301.1,NM_001256305.1,NM_001363574.2,NM_001145816.2,XR_938728.2,NM_001256307.1,NM_001256306.1	GRCh38.p13	chr4:174521959-174522008
51428	SLC24A5_01	SLC24A5	SLC24A5	XM_017022079.1,XM_024449901.1,XM_017022080.1,NM_205850.3	GRCh38.p13	chr15:48136902-48136951
51750	MROH2A_01	MROH2A	MROH2A	XM_024452846.1,XM_024452843.1,XM_024452842.1,XM_024452849.1,XM_011511076.2,XM_024452848.1,NM_001367507.1,XM_024452845.1,XM_024452844.1,XM_024452841.1,XM_024452840.1,XM_011511086.2,XM_024452839.1,XM_024452847.1	GRCh38.p13	chr2:233810866-233810915
12980	PSMB4_01	PSMB4	PSMB4	NM_002796.3	GRCh38.p13	chr1:151401302-151401336
39559	CTTN_01	CTTN	CTTN	NM_005231.4,XM_006718448.4,NM_001184740.2,XM_006718447.3,NM_138565.2,XM_017017312.2	GRCh38.p13	chr11:70407382-70407551
47259	ZNF708_01	ZNF708	ZNF708	XM_017027203.2,XM_017027202.2,NM_001297560.1,NM_021269.3,NM_001297561.1,XM_017027201.1,XM_017027204.2	GRCh38.p13	chr19:21294626-21294675
39006	TMEM247_01	TMEM247	TMEM247	NM_001145051.2	GRCh38.p13	chr2:46480432-46480472
39719	SLFN12L_01	SLFN12L	SLFN12L	XM_024450521.1,NM_001363830.1,XM_017024006.1,XM_017024007.1,XM_024450522.1,XM_024450523.1,NM_001195790.1,XM_024450520.1	GRCh38.p13	chr17:35478151-35479131
36084	ALDH2_01	ALDH2	ALDH2	NM_001204889.2,NM_000690.4	GRCh38.p13	chr12:111785341-111789865
51848	PRRT2_01	PRRT2	PRRT2	NM_001256443.2,XM_011545715.3,NM_145239.3,XM_017022887.2,XM_017022889.2,XM_017022888.2,NM_001256442.2	GRCh38.p13	chr16:29813715-29813759
46905	KAT14_01	KAT14	KAT14	NM_001384192.1,NR_028402.2,NM_020536.5	GRCh38.p13	chr20:18187469-18187518
50554	ZFP41_01	ZFP41	ZFP41	NM_001271156.3,NM_173832.6	GRCh38.p13	chr8:143250351-143250391
12239	HLA-DQA2_01	HLA-DQA2	HLA-DQA2	NM_020056.5	GRCh38.p13	chr6:32745257-32745291
38650	TBCCD1_01	TBCCD1	TBCCD1	NM_001134415.1,NM_001286749.2,NM_018138.5	GRCh38.p13	chr3:186554680-186554725
51624	EFCAB5_01	EFCAB5	EFCAB5	XR_934454.1,XM_011524759.1,XM_011524765.1,NM_198529.4,XM_017024591.1,NM_001145053.2,XM_011524763.2,XM_011524768.2,XM_024450742.1,XM_024450743.1,XM_017024592.1,NR_026738.2,XR_002957998.1	GRCh38.p13	chr17:30034352-30051133
47587	RTN4R_01	RTN4R	RTN4R	NM_023004.6	GRCh38.p13	chr22:20241468-20241517
49234	XAGE3_01	XAGE3	XAGE3	NM_133179.3,XM_011530768.2,NM_130776.1,XM_011530769.2,XM_011530770.2	GRCh38.p13	chrX:52864802-52864851
46235	SLC30A6_01	SLC30A6	SLC30A6	NM_001330476.2,NM_001193515.2,XM_011532962.3,XM_017004462.2,XM_011532959.3,NM_001330477.2,NM_001330478.2,XM_011532963.3,XM_024452981.1,NM_017964.5,XM_017004466.2,NM_001330479.2,XM_017004463.1,XM_006712048.4,NM_001193513.3,XM_024452982.1,XM_017004464.2,NM_001193514.2,XM_017004465.2	GRCh38.p13	chr2:32192354-32192403
41775	SYK_01	SYK	SYK	NM_001135052.4,NM_001174167.3,NM_003177.7,XM_011518946.3,XM_005252147.4,XR_001746370.2,NM_001174168.3	GRCh38.p13	chr9:90862246-90862280
46696	MTFR1L_01	MTFR1L	MTFR1L	NM_019557.5,NM_001099626.1,NM_001099625.2,NM_001099627.1	GRCh38.p13	chr1:25832040-25832089
46296	ODAD2_01	ODAD2	ODAD2	NM_001290021.2,XM_024448051.1,NM_018076.5,XM_024448055.1,XM_024448054.1,XM_024448049.1,XM_024448058.1,XM_024448050.1,XM_011519527.1,XM_024448053.1,NM_001312689.2,XM_024448052.1,XM_024448057.1,NM_001290020.2,XM_024448056.1	GRCh38.p13	chr10:27935114-27935161
45769	IL1RL1_01	IL1RL1	IL1RL1	NM_003856.4,NM_001282408.1,XM_011512151.1,NM_016232.5,XM_006712839.3,NR_104167.2	GRCh38.p13	chr2:102340698-102340747
51106	UBE2I_01	UBE2I	UBE2I	XM_011522645.1,XM_011522644.2,NM_194261.3,XM_017023640.1,NM_194259.3,XM_024450432.1,NM_003345.5,XM_005255540.2,NM_194260.3,XM_005255541.4	GRCh38.p13	chr16:1314303-1314345
48748	GAL3ST3_01	GAL3ST3	GAL3ST3	NM_033036.3,XM_017018519.1	GRCh38.p13	chr11:66041625-66041674
13621	VMA21_01	VMA21	VMA21	NM_001017980.3,NM_001363810.1	GRCh38.p13	chrX:151403631-151403671
41931	ZNF264_01	ZNF264	ZNF264	XM_011527522.2,NM_003417.5	GRCh38.p13	chr19:57211613-57211647
37435	SULT6B1_01	SULT6B1	SULT6B1	NM_001032377.2,NM_001367551.1	GRCh38.p13	chr2:37171498-37171543
51166	LMOD3_01	LMOD3	LMOD3	NM_198271.5,NM_001304418.3	GRCh38.p13	chr3:69119655-69119704
43580	CSF2RA_01	CSF2RA	CSF2RA	XM_011546174.3,XM_011545628.2,NM_172246.4,XM_011545627.3,NM_172247.3,NM_006140.6,XM_011546170.3,NM_001379163.1,XM_011546167.2,NM_001379162.1,XM_011545618.3,NM_001161529.2,XM_011545622.1,XM_011545623.3,XM_011546169.1,NM_001379169.1,NM_001379168.1,NM_001379153.1,NM_172245.4,NM_001161532.2,NM_172249.4,NM_001379165.1,NR_027760.3,NM_001379164.1,NM_001161531.2,NM_001161530.2,NM_001379167.1,XM_011546175…	GRCh38.p13	chrY:1290388-1290437,chrX:1290388-1290437
37919	ZNF629_01	ZNF629	ZNF629	NM_001345970.2,NM_001080417.3	GRCh38.p13	chr16:30779312-30779352
48008	PTGES2_01	PTGES2	PTGES2	NM_001256335.1,XM_011519050.1,NM_025072.7,XM_011519051.3,XR_001746383.2,XM_024447688.1,NM_198938.2,XM_005252239.2	GRCh38.p13	chr9:128121262-128122388
43187	UBA2_01	UBA2	UBA2	XM_011526304.2,NM_005499.3,XR_001753571.1,XM_017026134.1,XM_006722962.2,XM_024451305.1,XM_005258404.3,XR_935712.2	GRCh38.p13	chr19:34434945-34438670
40686	EN1_01	EN1	EN1	NM_001426.4	GRCh38.p13	chr2:118842673-118842722
35610	IGHG2_01	IGHG2	IGHG2
45460	HEATR5A_01	HEATR5A	HEATR5A	NM_015473.4	GRCh38.p13	chr14:31388905-31388954
43952	LRBA_01	LRBA	LRBA	NM_006726.4,NM_001199282.2,XM_005263373.3,XM_017008873.2,XM_005263374.3,XM_011532434.2,NM_001364905.1,NM_001367550.1,XM_017008874.1,XM_005263372.3	GRCh38.p13	chr4:150282513-150282562
37693	NCALD_01	NCALD	NCALD	NM_001040626.1,NM_001040625.1,XM_024447298.1,XM_024447299.1,NM_032041.3,XM_024447296.1,XM_024447297.1,XM_024447300.1,XM_024447301.1,XM_011517333.2,NM_001040630.1,XM_011517332.3,XM_024447302.1,XM_017013901.1,XM_024447303.1,XM_011517335.2,XM_011517334.2,XM_024447304.1,NM_001040629.1,NM_001040628.1,NM_001040624.1,NM_001040627.1	GRCh38.p13	chr8:101686695-101686744
49938	PDCL2_01	PDCL2	PDCL2	XM_011534374.2,XM_005265728.3,NM_152401.3	GRCh38.p13	chr4:55569845-55580853
49980	ZNF785_01	ZNF785	ZNF785	NM_152458.7	GRCh38.p13	chr16:30581762-30581807
41610	RFC3_01	RFC3	RFC3	XM_017020681.2,XM_017020682.2,XM_011535172.3,XM_017020683.2,NM_181558.2,XM_017020680.2,XM_011535175.2,XM_011535173.3,XM_011535174.3,NM_002915.4	GRCh38.p13	chr13:33830826-33831275
43060	GPR21_01	GPR21	GPR21	XM_005251933.4,NM_005294.3	GRCh38.p13	chr9:123035542-123035591
39291	KRTAP22-2_01	KRTAP22-2	KRTAP22-2	NM_001164434.1	GRCh38.p13	chr21:30590292-30590339
37889	VAV3_01	VAV3	VAV3	XR_001736913.1,XM_017000055.1,XM_017000054.1,XM_005270360.2,XM_017000053.1,NM_001079874.2,XM_017000056.1,NM_006113.5,XM_024450319.1	GRCh38.p13	chr1:107609937-107617587
44078	SOS2_01	SOS2	SOS2	NM_006939.4	GRCh38.p13	chr14:50118496-50118545
50761	PTF1A_01	PTF1A	PTF1A	NM_178161.3	GRCh38.p13	chr10:23193846-23193895
36881	LAMTOR4_01	LAMTOR4	LAMTOR4	NM_001318236.2,NR_134528.1,NM_001008395.4,XM_024446761.1,NR_134527.2,XM_024446760.1,NR_134526.2,NR_134530.1,NR_134529.1,NM_001318237.2	GRCh38.p13	chr7:100154143-100154183
46091	TRPM7_01	TRPM7	TRPM7	XR_001751327.1,XM_005254486.4,XM_017022354.1,XM_017022355.1,XM_017022350.1,XR_001751328.2,XM_017022351.1,XR_002957654.1,XR_001751325.1,NM_017672.6,NR_149154.2,NM_001301212.2,XR_002957653.1,NR_149153.2,NR_149152.2,XM_017022352.1,XR_001751326.2,XM_017022353.2	GRCh38.p13	chr15:50613821-50614151
36947	CEP131_01	CEP131	CEP131	XM_017024369.1,XM_011524551.2,XM_011524548.2,XM_011524555.2,XM_011524550.2,NM_001319228.2,XM_011524547.2,XM_011524553.2,NM_001009811.4,NM_001319229.2,XM_011524552.2,NM_014984.4	GRCh38.p13	chr17:81195917-81196701
44753	CD5_01	CD5	CD5	NM_001346456.1,NM_014207.4	GRCh38.p13	chr11:61125032-61125081
41127	HPCA_01	HPCA	HPCA	NM_002143.3,XM_005270792.3,XM_017001118.2	GRCh38.p13	chr1:32894384-32894425
46516	CENPJ_01	CENPJ	CENPJ	NM_018451.5,NR_047594.2,XR_941627.1,NR_047595.2	GRCh38.p13	chr13:24884434-24885295
47244	DMRT3_01	DMRT3	DMRT3	NM_021240.4	GRCh38.p13	chr9:990907-990956
38234	PACS2_01	PACS2	PACS2	XM_017021106.2,XM_017021110.2,XR_001750200.2,XM_017021107.2,XM_017021108.2,XM_006720092.3,XM_017021112.2,XM_017021109.2,NM_001243127.3,NM_015197.4,XM_017021105.2,XM_006720091.2,NM_001100913.3,XM_017021111.2,XM_006720090.2	GRCh38.p13	chr14:105391211-105391249
36341	OR9A2_01	OR9A2	OR9A2	NM_001001658.1	GRCh38.p13	chr7:143026786-143026835
43966	SNTB2_01	SNTB2	SNTB2	NM_006750.3	GRCh38.p13	chr16:69301977-69302026
41319	MSI1_01	MSI1	MSI1	XM_011538363.2,XM_011538366.2,XM_011538364.2,XM_006719403.3,XM_011538362.2,XM_011538365.2,XM_011538370.2,XM_011538371.2,XM_011538368.2,XM_011538361.3,NM_002442.4,XM_006719404.3	GRCh38.p13	chr12:120357830-120357879
42135	RNGTT_01	RNGTT	RNGTT	XR_942617.3,XM_017011401.2,XR_001743703.2,NM_003800.5,NM_001286426.2,XM_017011402.2,NM_001286428.2	GRCh38.p13	chr6:88904934-88906392
50030	ATP6V0D2_01	ATP6V0D2	ATP6V0D2	NM_152565.1	GRCh38.p13	chr8:86139566-86139615
42699	COX7A2L_01	COX7A2L	COX7A2L	NM_001319037.1,NR_134948.1,NM_001319040.1,NR_134947.1,NM_001319038.2,NM_004718.4,NM_001319036.1	GRCh38.p13	chr2:42353296-42360939,chr2:42353296-42368869,chr2:42353296-42359107,chr2:42353296-42361091
46848	REXO4_01	REXO4	REXO4	XM_024447613.1,NM_001279349.1,NM_001279351.1,NR_103996.2,NM_001279350.2,NR_103995.2,XM_024447611.1,NM_020385.4,XR_001746354.2,XM_024447612.1	GRCh38.p13	chr9:133406782-133406830
49282	POFUT2_01	POFUT2	POFUT2	NM_133635.6,XM_011529510.2,XM_011529507.3,XR_002958590.1,XM_017028309.1,NM_015227.6,NR_004858.3,XM_017028306.2,XM_011529504.3,XM_006723981.4,XM_024452058.1	GRCh38.p13	chr21:45265132-45265181
38259	FAM13B_01	FAM13B	FAM13B	XM_005272007.2,NM_001385977.1,NM_001385976.1,NM_001385867.1,NM_001385866.1,NM_001385870.1,NR_169824.1,NM_001101801.2,XM_006714647.2,NR_169815.1,NM_001385980.1,NR_169814.1,NR_169822.1,NM_001385872.1,NR_169823.1,NR_169826.1,NM_001385873.1,NR_169825.1,NM_001385999.1,NM_001101800.2,XM_011543448.1,XM_024446107.1,XM_011543449.1,XM_011543450.1,NM_001385998.1,XM_017009551.2,NM_001385997.1,XM_017009550.1,…	GRCh38.p13	chr5:137939533-137939582
43920	PPP1R13L_01	PPP1R13L	PPP1R13L	XM_017026179.1,NM_001142502.2,XM_017026177.1,NM_006663.4,XM_017026178.1	GRCh38.p13	chr19:45398125-45398279
42651	MAPKAPK3_01	MAPKAPK3	MAPKAPK3	NM_001243925.2,NM_004635.4,NM_001243926.1,XR_940501.2	GRCh38.p13	chr3:50640453-50640502
48830	KCNH7_01	KCNH7	KCNH7	XM_017005220.2,NM_173162.3,NM_033272.4,XM_011512109.3,XM_017005218.2,XM_017005221.2,XM_017005219.2	GRCh38.p13	chr2:162446224-162446273
34841	ARHGAP20_01	ARHGAP20	ARHGAP20	NM_001258415.2,NM_001384657.1,NM_020809.4,XM_005271628.3,NM_001258418.2,NM_001258417.2,NM_001258416.2	GRCh38.p13	chr11:110580291-110580325
48635	PLCD4_01	PLCD4	PLCD4	XM_017005114.1,XM_011512012.1,XM_017005117.1,XM_017005116.1,XM_024453182.1,XR_241325.1,NM_032726.4,XM_005246913.2,XM_017005115.1,XM_017005118.2	GRCh38.p13	chr2:218622680-218622729
35807	PAX6_01	PAX6	PAX6	NM_001368909.2,NM_001310160.2,NM_001368908.2,NM_001368893.2,NM_001604.6,NM_001368892.2,NM_001368888.2,NM_001368905.2,NM_001368889.2,NM_001368904.2,NM_001310159.1,NM_001368924.2,NM_001368907.2,NM_001368914.2,NM_001368906.2,NM_001368915.2,NR_160917.2,NM_001368919.2,NM_001368923.2,NM_001258462.3,NR_160916.2,NM_001368922.2,NM_001368887.2,NM_001368901.2,NM_001258464.2,NM_001310161.3,NM_001368900.2,NM_…	GRCh38.p13	chr11:31793543-31793690,chr11:31793536-31793683
34771	CBLN2_01	CBLN2	CBLN2	XM_006722394.3,NM_182511.4,XM_017025559.1,XM_011525824.2,XM_017025560.1	GRCh38.p13	chr18:72541807-72541844
38222	VSIG4_01	VSIG4	VSIG4	NM_001100431.2,XM_017029251.2,NM_007268.3,NM_001257403.2,NM_001184831.2,NM_001184830.1	GRCh38.p13	chrX:66033764-66033802
48726	RAB11FIP4_01	RAB11FIP4	RAB11FIP4	NM_001346749.2,NM_001303542.3,NM_001346748.2,NM_032932.6,NM_001346747.2	GRCh38.p13	chr17:31537364-31537413
44911	RND1_01	RND1	RND1	NM_014470.4	GRCh38.p13	chr12:48861103-48862029
50118	HIBADH_01	HIBADH	HIBADH	XM_017011719.2,NM_152740.4	GRCh38.p13	chr7:27525730-27525779
37481	DMAP1_01	DMAP1	DMAP1	NM_019100.5,NM_001034024.2,NM_001034023.2	GRCh38.p13	chr1:44218340-44218383
37448	EXTL2_01	EXTL2	EXTL2	NM_001261441.1,XM_005270621.1,XM_011540996.2,NM_001033025.3,NM_001261442.1,XR_001737037.1,XM_011540995.2,XM_011540994.2,NR_048570.1,NM_001261440.1,XM_017000651.2,NM_001439.3	GRCh38.p13	chr1:100877677-100877726
47223	RHOU_01	RHOU	RHOU	NR_037962.1,NM_021205.6	GRCh38.p13	chr1:228745173-228745222
45470	PNISR_01	PNISR	PNISR	XM_024446397.1,NM_001322419.2,XM_024446398.1,NM_001322418.2,NM_015491.2,NM_001322406.2,NR_136326.2,NM_001322405.2,NM_032870.4,NM_001322408.2,XM_005266912.4,XM_017010711.1,NM_001322416.1,NM_001322414.2,XM_017010710.2,NM_001322415.2,XM_017010713.1,NM_001322410.1,XM_017010712.1,NM_001322417.2,NM_001322413.1,NM_001322412.1	GRCh38.p13	chr6:99410738-99410787,chr6:99409342-99410787
44478	OR2C1_01	OR2C1	OR2C1	NM_012368.3	GRCh38.p13	chr16:3356688-3356731
35986	LDLR_01	LDLR	LDLR	XM_011528010.2,NM_001195803.2,NM_001195798.2,NM_001195799.2,NM_000527.5,NM_001195800.2,XR_001753686.2,XR_001753685.2	GRCh38.p13	chr19:11133263-11133312
11952	FAM83D_01	FAM83D	FAM83D	NM_030919.3,XM_017028088.1	GRCh38.p13	chr20:38941977-38942016
42807	GMFG_01	GMFG	GMFG	NM_004877.4,NM_001301008.2	GRCh38.p13	chr19:39329562-39329611
46808	CHPT1_01	CHPT1	CHPT1	XR_245946.2,XR_002957362.1,XR_001748816.1,XR_001748817.1,XM_011538574.1,NM_020244.3,XR_001748818.1,XM_011538575.1	GRCh38.p13	chr12:101726309-101726358
42139	RIPK1_01	RIPK1	RIPK1	XM_017011405.1,NM_001354932.2,NM_003804.6,NM_001354933.2,NM_001354931.2,NM_001354934.2,XM_017011403.1,NM_001354930.2,XM_006715237.3,NM_001317061.3	GRCh38.p13	chr6:3085331-3085380
35141	FAHD2B_01	FAHD2B	FAHD2B,FAHD2A	XM_011510745.2,XM_011511282.2,XM_017004238.1,XM_024452939.1,XM_017004250.1,XM_011511285.2,XM_011511284.2,XM_011510748.2,XM_024452942.1,XM_011511287.2,XM_017004245.1,NM_016044.3,XM_011511286.2,XM_011511289.2,XM_024452940.1,XM_011511288.2,XM_024452941.1,NM_199336.3,XM_017004242.1,XR_001738649.1,XM_017004243.1,XM_017003472.2,XM_017004240.1,XM_017004241.1,XM_017003470.1,XM_011510746.2,XM_017003471.1,…	GRCh38.p13	chr2:97090182-97090216,chr2:95407050-95407084
46990	RPTOR_01	RPTOR	RPTOR	NM_001163034.2,NM_020761.3	GRCh38.p13	chr17:80966183-80966232
39725	BCL7B_01	BCL7B	BCL7B	NR_036682.2,NM_001197244.2,NM_001301061.2,NM_001707.4	GRCh38.p13	chr7:73543638-73552206
49281	SPACA4_01	SPACA4	SPACA4	NM_133498.3	GRCh38.p13	chr19:48607543-48607592
46352	INTS13_01	INTS13	INTS13	XM_011520750.2,XM_017019633.1,XM_017019632.1,NM_018164.3,XM_017019636.2,XM_024449055.1,XR_001748805.2,XM_017019635.1,XM_017019634.1,XR_001748804.2,XM_011520752.3,XM_024449056.1,XM_005253422.4,XM_011520751.3	GRCh38.p13	chr12:26928743-26928787
46372	P3H2_01	P3H2	P3H2	NM_001134418.1,XM_011512955.1,NM_018192.4	GRCh38.p13	chr3:189989025-189994129
48575	ABTB1_01	ABTB1	ABTB1	XM_024453782.1,NM_172027.3,XR_001740286.1,XM_017007285.1,XR_924182.2,XM_011513213.1,XM_024453783.1,NM_032548.3,XM_017007288.1,XM_006713769.3,XM_017007287.1,NR_033429.1,XR_002959591.1,XM_017007286.2	GRCh38.p13	chr3:127680805-127680854
36090	ALOX12_01	ALOX12	ALOX12	NM_000697.3,XM_011523780.2	GRCh38.p13	chr17:7010350-7010393
48677	PLXDC2_01	PLXDC2	PLXDC2	XM_011519750.2,NM_032812.9,NM_001282736.2	GRCh38.p13	chr10:19817178-20001810
36501	GRK4_01	GRK4	GRK4	XM_017008064.1,XM_006713880.3,XM_017008055.1,XM_017008054.1,XM_024454015.1,XM_017008058.1,XR_924941.2,XM_017008062.1,XM_017008063.1,NM_001350173.2,NM_001004056.2,NM_001004057.2,XM_017008059.2,XM_017008053.1,XM_017008052.1,XM_017008066.1,NM_005307.3,NM_182982.3,XM_011513455.2,XM_005247962.3,XM_011513447.2,XM_017008057.1,XM_017008056.1,XM_011513456.2,XR_001741210.1,XM_011513452.2,XM_011513453.2,XM_…	GRCh38.p13	chr4:3019789-3022420
49986	RNF165_01	RNF165	RNF165	XM_011526016.3,NM_152470.3,XM_024451191.1,NM_001256758.1	GRCh38.p13	chr18:46457045-46457094
44583	TRA2A_01	TRA2A	TRA2A	NM_001362760.2,XM_017012090.1,NM_001282757.1,NM_013293.5,NM_001282759.1,NM_001362761.2,NM_001362759.2,NM_001282758.1	GRCh38.p13	chr7:23516485-23521712
40124	OR2L5_01	OR2L5	OR2L5	NM_001258284.2
49954	HGSNAT_01	HGSNAT	HGSNAT	XM_005273412.4,NM_001363229.2,NM_001363227.2,NM_001363228.2,XM_005273409.1,XM_005273411.1,NM_152419.3	GRCh38.p13	chr8:43191565-43192309
51280	FAM120AOS_01	FAM120AOS	FAM120AOS	NM_198841.4,NR_136231.3,NR_136230.2,NM_001322224.3,NR_136236.3,NR_136233.3,NR_136232.3,NR_136237.3,NR_136234.3,NR_136229.2,NR_136238.3,NR_136235.3	GRCh38.p13	chr9:93446775-93446824
46904	MCOLN1_01	MCOLN1	MCOLN1	NM_020533.3	GRCh38.p13	chr19:7530321-7530370
51536	MROH5_01	MROH5	MROH5	NR_160399.1,NR_102364.2,NM_207414.2,NR_102363.2	GRCh38.p13	chr8:141471146-141471183
47833	VPS37B_01	VPS37B	VPS37B	XM_006719602.4,XM_011538745.2,XM_011538743.2,XM_005253622.3,NM_024667.3	GRCh38.p13	chr12:122866952-122867001
35554	MINDY2_01	MINDY2	MINDY2	NM_001040453.3,XM_017022332.2,XM_011521687.2,XR_001751323.2,XM_017022333.2,XM_011521688.2,XM_011521690.2,XM_017022334.2,XM_011521689.2,XR_001751324.2,NM_001040450.3,XM_017022335.2,XM_024449964.1	GRCh38.p13	chr15:58772093-58772127
42087	HSD17B6_01	HSD17B6	HSD17B6	XM_011538925.1,XM_005269207.1,XM_006719672.1,XM_005269208.1,NM_003725.4,XM_005269209.1,XM_024449250.1,XM_024449251.1,XM_011538927.1,XM_011538926.1,XM_024449249.1	GRCh38.p13	chr12:56782196-56784865
44182	ZNF135_01	ZNF135	ZNF135	XM_017027242.1,XM_006723363.3,NM_001289402.1,NM_003436.4,NM_007134.1,XM_017027240.1,NM_001164530.1,XM_017027241.1,NM_001164529.1,NM_001164527.1,XM_005259211.1,NM_001289401.2,XM_006723362.4	GRCh38.p13	chr19:58063453-58063491
47942	L2HGDH_01	L2HGDH	L2HGDH	XM_005268075.5,XM_017021655.2,XM_017021656.2,XM_011537166.3,NM_024884.3,XM_011537167.3,XM_017021657.2,XM_011537168.3	GRCh38.p13	chr14:50247133-50247182
45862	DTL_01	DTL	DTL	NM_016448.4,NM_001286230.1,XM_011509614.1,NM_001286229.1	GRCh38.p13	chr1:212047359-212047408
41208	KLK1_01	KLK1	KLK1	XM_011526942.1,NM_002257.4	GRCh38.p13	chr19:50820421-50821728
40277	MGAT4D_01	MGAT4D	MGAT4D	XR_938697.2,XM_011531652.2,XM_011531653.3,XM_011531657.3,XM_011531658.3,XM_011531662.2,XM_011531659.2,XM_011531650.3,XM_011531661.2,XM_011531651.2,NM_001277353.2,XM_011531654.3,XM_011531656.3	GRCh38.p13	chr4:140474814-140474863
51293	PYHIN1_01	PYHIN1	PYHIN1	XM_005244930.2,NM_198929.5,NM_198928.5,XM_017000463.1,NM_198930.4,XM_011509242.2,XM_011509243.2,NM_152501.5	GRCh38.p13	chr1:158938447-158938496
40922	CEBPE_01	CEBPE	CEBPE	NM_001805.4	GRCh38.p13	chr14:23117311-23117360
40253	CHI3L1_01	CHI3L1	CHI3L1	NM_001276.4	GRCh38.p13	chr1:203183752-203184585
47915	DCAKD_01	DCAKD	DCAKD	XM_011525262.2,NM_001321326.2,NM_024819.7,NM_001288654.2,NM_001128631.3,XM_017025105.1,NM_001288655.2	GRCh38.p13	chr17:45023410-45023459
42832	CALB1_01	CALB1	CALB1	NM_004929.4,NM_001366795.1	GRCh38.p13	chr8:90060131-90060180
13142	RTL3_01	RTL3	RTL3	NM_152694.3	GRCh38.p13	chrX:78657947-78657981
48365	IFI27L2_01	IFI27L2	IFI27L2	NM_032036.3	GRCh38.p13	chr14:94127853-94127893
46817	PDXP_01	PDXP	PDXP	NM_020315.5	GRCh38.p13	chr22:37666376-37666422
34828	NCAPD3_01	NCAPD3	NCAPD3	NM_001372068.1,NM_001372065.1,NM_001372070.1,NM_015261.3,NM_001372069.1	GRCh38.p13	chr11:134184693-134184738
39927	CASP4_01	CASP4	CASP4	XM_011543019.1,XM_017018397.1,NM_033306.3,NM_001225.4	GRCh38.p13	chr11:104954894-104954943
45204	SPEN_01	SPEN	SPEN	NM_015001.3	GRCh38.p13	chr1:15928237-15928282
40752	SLC29A2_01	SLC29A2	SLC29A2	XM_017017632.1,NM_001300869.1,NR_125343.1,XM_017017636.2,XM_011544974.1,XM_024448462.1,XR_001747845.2,XM_024448463.1,NM_001300868.1,XR_001747844.2,XR_001747842.1,XM_024448465.1,XM_024448461.1,NM_001532.3,XM_017017633.2,XM_024448464.1	GRCh38.p13	chr11:66369511-66371256
36799	RPS3A_01	RPS3A	RPS3A	NM_001006.5,NM_001267699.1	GRCh38.p13	chr4:151102944-151102991
49198	TRIM34_01	TRIM34	TRIM6-TRIM34,TRIM34	NM_130390.2,NM_001003827.1,NM_021616.6,NM_001003819.4	GRCh38.p13	chr11:5634658-5634707
34819	MRPL11_01	MRPL11	MRPL11	NM_016050.5,NR_120589.1,XM_017018135.2,NR_120588.1,XM_024448661.1,NM_170738.4,NM_170739.3	GRCh38.p13	chr11:66438199-66438242
38486	CPA6_01	CPA6	CPA6	NM_020361.5,XM_017013647.1,XR_001745565.1,XM_017013646.1,XM_011517570.2	GRCh38.p13	chr8:67505799-67506834,chr8:67484788-67506834
45329	CLEC16A_01	CLEC16A	CLEC16A	XM_011522437.3,XM_011522440.3,XM_024450218.1,XR_932810.3,NM_001243403.1,XM_005255216.2,XM_005255213.2,XM_011522436.3,XM_006720870.4,XM_005255211.2,XM_011522435.2,NM_015226.3,XM_011522439.3,XM_005255210.2,XM_005255215.4,XM_005255214.2,XM_011522438.3,XM_017023089.2,XM_011522434.2	GRCh38.p13	chr16:11003095-11003144
36075	ADRA1D_01	ADRA1D	ADRA1D	NM_000678.4	GRCh38.p13	chr20:4222064-4222113
41578	RAB2A_01	RAB2A	RAB2A	NM_001242644.1,NM_002865.3	GRCh38.p13	chr8:60584726-60584775
6750	PYCR1_01	PYCR1	PYCR1	NM_001330523.1,NM_006907.4,XM_005256381.2,XM_011523585.2,XM_011523584.3,NM_153824.3,XM_024450849.1,XM_011523583.2,NM_001282281.2,NM_001282279.2,NM_001282280.1	GRCh38.p13	chr17:81935146-81935369
45243	ZNF423_01	ZNF423	ZNF423	NM_001271620.2,NM_015069.4,NM_001379286.1,XM_005255856.4,NM_001330533.2,XM_017023077.1,XM_006721171.4,XM_017023078.1	GRCh38.p13	chr16:49636306-49636355
39542	MINPP1_01	MINPP1	MINPP1	XM_011540379.3,NM_004897.5,NM_001178117.1,XM_006718078.3,NM_001178118.1	GRCh38.p13	chr10:87552131-87552180
42554	GP5_01	GP5	GP5	NM_004488.2	GRCh38.p13	chr3:194397567-194397616
45165	SLITRK3_01	SLITRK3	SLITRK3	NM_001318811.1,NM_014926.4,NM_001318810.2	GRCh38.p13	chr3:165189826-165189875
44241	GPR45_01	GPR45	GPR45	NM_007227.3	GRCh38.p13	chr2:105242133-105242167
36187	GRIK3_01	GRIK3	GRIK3	NM_000831.4	GRCh38.p13	chr1:36800614-36800660
43601	NPPA_01	NPPA	NPPA	NM_006172.4	GRCh38.p13	chr1:11847564-11847613
34800	DLGAP5_01	DLGAP5	DLGAP5	NM_014750.5,NM_001146015.2,XM_017021840.2	GRCh38.p13	chr14:55177122-55177156
45105	CDC42BPA_01	CDC42BPA	CDC42BPA	NM_001366010.2,XM_011544307.3,XM_011544306.3,XM_005273318.4,XM_006711835.4,XM_017002582.2,XM_005273320.4,NM_001366011.1,XM_017002581.2,XM_017002578.2,NM_003607.4,XM_006711834.4,XM_017002580.2,NM_001366019.2,XM_005273321.4,XM_011544309.3,XM_005273317.4,NM_014826.5,XM_017002579.2,XM_005273322.4,XM_011544308.3	GRCh38.p13	chr1:227035547-227035596
49914	ZNF491_01	ZNF491	ZNF491	XM_005259730.4,NM_152356.4	GRCh38.p13	chr19:11806173-11806222
46005	MFAP2_01	MFAP2	MFAP2	NM_001135247.1,NM_002403.4,NM_001135248.1,NM_017459.2	GRCh38.p13	chr1:16975331-16975675
38868	EDC3_01	EDC3	EDC3	NM_025083.5,XM_011522092.3,NM_001142443.3,XM_024450078.1,NM_001351378.2,XM_024450079.1,NM_001351379.2,XM_024450077.1,NM_001142444.3	GRCh38.p13	chr15:74655917-74655966
39857	ZNF664_01	ZNF664	ZNF664	NM_152437.3,NM_001204298.2	GRCh38.p13	chr12:124013074-124013123
35592	ZNF468_01	ZNF468	ZNF468	NR_102299.2,XM_017027444.1,NM_001008801.2,NR_102301.2,XM_017027443.1,NR_102300.2,NM_001277120.2	GRCh38.p13	chr19:52840064-52840099
35296	OGG1_01	OGG1	OGG1	NM_001354649.1,XM_017006495.2,NM_016828.2,XM_017006494.2,NM_016829.2,XM_017006497.2,NM_001354652.1,XM_017006493.2,XM_017006496.2,NM_016827.2,NM_016826.2,NM_016820.3,NM_016821.2,NM_001354648.1,NM_002542.5,XM_011533760.2,NR_148930.1,NM_001354650.1,NM_001354651.1,NR_148931.1,XR_001740156.2,NR_148932.1,NM_016819.3,XM_017006499.2	GRCh38.p13	chr3:9750320-9750354
51317	CXCL12_01	CXCL12	CXCL12	NM_001178134.2,XR_001747171.1,NM_199168.4,NM_001033886.2,XR_001747172.1,XR_001747173.1,NM_001277990.2,XR_001747174.1,NM_000609.7	GRCh38.p13	chr10:44384979-44385019
41542	PSMB7_01	PSMB7	PSMB7	NM_002799.4	GRCh38.p13	chr9:124405375-124405424
47444	C11orf24_01	C11orf24	C11orf24	XM_005274053.4,NM_022338.4,XM_011545103.3,NM_001300913.2	GRCh38.p13	chr11:68262872-68263694,chr11:68262872-68263575
43181	PARP3_01	PARP3	PARP3	XM_017005490.1,NM_001370240.1,NM_001003931.4,NM_005485.5,NM_001370239.1	GRCh38.p13	chr3:51944111-51944150
50749	SESTD1_01	SESTD1	SESTD1	XR_001739031.1,XM_011512139.2,XM_017005250.1,XR_001739032.1,XM_017005251.1,NM_178123.5,XM_011512141.2	GRCh38.p13	chr2:179115184-179115233
36262	PLA2G5_01	PLA2G5	PLA2G5	XM_024447706.1,XM_011541592.3,NM_000929.3,XM_005245891.5,XM_011541589.3,XM_011541588.3,XM_011541587.3,XM_005245892.5,XM_011541586.3,XM_011541590.3,XM_005245893.5,XM_011541591.3	GRCh38.p13	chr1:20090733-20090782
50456	VKORC1L1_01	VKORC1L1	VKORC1L1	XM_011515831.3,NM_001284342.3,NM_173517.6	GRCh38.p13	chr7:65954143-65954192
49237	GIPC3_01	GIPC3	GIPC3	XM_005259492.3,NM_133261.3	GRCh38.p13	chr19:3592080-3592114
37704	KIAA0895L_01	KIAA0895L	KIAA0895L	NM_001369681.1,NM_001369680.1,NM_001369685.1,NM_001369684.1,NM_001040715.2,NM_001369682.1,NM_001369687.1,NM_001369686.1	GRCh38.p13	chr16:67180094-67180131
42170	DYRK4_01	DYRK4	DYRK4	NM_001282286.1,NM_001282285.1,NM_001371301.1,NM_003845.2	GRCh38.p13	chr12:4613611-4613645
46573	ZC4H2_01	ZC4H2	ZC4H2	NM_018684.4,NM_001243804.2,NM_001178032.3,NM_001178033.2,NR_045044.2	GRCh38.p13	chrX:64916826-64916875
46287	HELLS_01	HELLS	HELLS	NM_001289069.2,NM_001289071.2,XM_024447967.1,NM_001289075.2,NM_001289070.1,NM_001289074.2,NM_001289067.1,XM_024447968.1,NM_001289073.2,NM_018063.5,NM_001289072.2,NM_001289068.2	GRCh38.p13	chr10:94592479-94593512
43542	CCL26_01	CCL26	CCL26	NM_001371938.1,NM_001371936.1,NM_006072.4	GRCh38.p13	chr7:75771951-75771993
44150	PLAAT3_01	PLAAT3	PLAAT3	XM_011544741.1,NM_001128203.1,NM_007069.3,XM_006718426.1	GRCh38.p13	chr11:63574910-63574959
42596	NDUFS5_01	NDUFS5	NDUFS5	NM_004552.3,NM_001184979.1	GRCh38.p13	chr1:39028751-39028800
50500	GXYLT1_01	GXYLT1	GXYLT1	NM_173601.2,NM_001099650.2,XM_017019211.1	GRCh38.p13	chr12:42085349-42085398
38489	FLNC_01	FLNC	FLNC	NM_001127487.2,NM_001458.5	GRCh38.p13	chr7:128854862-128854896
45335	CSTF2T_01	CSTF2T	CSTF2T	NM_015235.3	GRCh38.p13	chr10:51696606-51696655
35392	GOLGA6L6_01	GOLGA6L6	GOLGA6L22,GOLGA6L6,LOC102723623,GOLGA6L1	NM_001271664.2,NM_001145004.2,XM_017022778.1,NM_001001413.3,NM_001382446.1	GRCh38.p13	chr15:20532762-20532811,chr15:23325437-23325486,chr15:23127972-23128021
41018	STX2_01	STX2	STX2	NM_001980.5,NM_001351052.2,XM_017018984.1,XM_017018979.2,XM_017018978.1,XM_017018980.2,NM_001351051.2,NM_194356.4,XM_017018982.2,NM_001351049.2,XM_017018983.2	GRCh38.p13	chr12:130791726-130791775
49194	WAC_01	WAC	WAC	XM_017016315.2,NM_016628.5,XM_024448036.1,NM_100486.4,XR_930491.2,XM_017016317.2,NM_100264.3,XM_017016318.2,XR_001747110.1	GRCh38.p13	chr10:28608257-28608295
41347	PPP1R12A_01	PPP1R12A	PPP1R12A	NM_001143885.1,NM_002480.3,NM_001244992.1,NM_001143886.1,NM_001244990.1	GRCh38.p13	chr12:79788682-79788731
50982	CCDC38_01	CCDC38	CCDC38	XM_006719229.2,XM_011537884.2,XM_011537889.1,XM_011537883.2,XM_011537887.2,NM_182496.3,XM_011537886.2	GRCh38.p13	chr12:95917157-95917206
34538	CACNG6_01	CACNG6	CACNG6	NM_145815.2,NM_031897.3,XM_006723316.3,NM_145814.2,NR_102308.1	GRCh38.p13	chr19:54011979-54012013
39932	CASQ2_01	CASQ2	CASQ2	NM_001232.4	GRCh38.p13	chr1:115740765-115740814
46166	KANSL2_01	KANSL2	KANSL2	NM_017822.4	GRCh38.p13	chr12:48655023-48660377
40788	ACTA2_01	ACTA2	ACTA2	NM_001141945.2,NM_001613.4,NM_001320855.1	GRCh38.p13	chr10:88939617-88939666
50803	R3HDML_01	R3HDML	R3HDML	NM_178491.4	GRCh38.p13	chr20:44337356-44337395
37265	ZSCAN26_01	ZSCAN26	ZSCAN26	XM_024446538.1,NM_152736.5,XM_017011264.1,XM_024446539.1,NM_001287422.1,XM_011514869.1,XM_011514862.2,XM_011514867.2,NM_001111039.2,XM_017011265.1,XM_011514864.1,NM_001023560.3,NM_001287421.1,XM_011514866.1	GRCh38.p13	chr6:28277119-28277163
11486	C1orf21_01	C1orf21	C1orf21	NM_030806.4	GRCh38.p13	chr1:184477568-184477602
43353	FARP1_01	FARP1	FARP1	NM_001001715.4,NM_005766.4,XM_011521046.2,NM_001286839.2,XM_017020312.1	GRCh38.p13	chr13:98213282-98213323
36026	CD14_01	CD14	CD14	NM_001174105.2,NM_001040021.3,NM_000591.4,NM_001174104.1	GRCh38.p13	chr5:140632368-140632402
13089	RMND5A_01	RMND5A	RMND5A	NM_022780.4	GRCh38.p13	chr2:86765946-86765985
45293	DIP2A_01	DIP2A	DIP2A	XM_017028291.1,NM_001353944.2,XM_017028305.1,XM_017028304.1,NM_001353943.1,NM_001353942.1,XM_011529502.1,XM_017028299.1,XM_017028297.1,XM_017028301.1,XM_017028303.1,XM_017028302.2,XM_017028298.2,NM_001146116.1,XM_017028295.2,XM_017028294.2,NM_001146115.2,XM_017028300.1,XM_011529492.2,XM_017028293.1,XM_017028292.1,NM_206891.3,NM_206889.3,NM_206890.3,XM_011529501.1,NM_015151.4	GRCh38.p13	chr21:46541827-46541876
51112	TMEM65_01	TMEM65	TMEM65	NM_194291.2	GRCh38.p13	chr8:124320147-124322109
35983	HTR1A_01	HTR1A	HTR1A	NM_000524.4	GRCh38.p13	chr5:63961045-63961086
50650	TXLNA_01	TXLNA	TXLNA	XM_017000563.1,NM_001376857.1,NM_001376858.1,NM_001376859.1,NM_175852.4,XM_011540932.2,XM_017000561.1,XM_011540931.2	GRCh38.p13	chr1:32197619-32197665
48476	BTBD10_01	BTBD10	BTBD10	NM_032320.7,XM_024448712.1,XR_001748000.2,XM_024448713.1,XR_001748002.2,XM_017018405.1,XM_017018409.1,XR_001748001.2,NM_001297742.1,XM_017018410.1,NM_001297741.1,XM_017018411.1,XM_017018406.2	GRCh38.p13	chr11:13405708-13405757
51110	SRRM4_01	SRRM4	SRRM4	NM_194286.4	GRCh38.p13	chr12:119159451-119159500
51298	NELFCD_01	NELFCD	NELFCD	NM_198976.4,XR_244142.3	GRCh38.p13	chr20:58991026-58991075
49690	FAM200A_01	FAM200A	FAM200A	NM_145111.4,XM_011515913.2,XM_024446681.1	GRCh38.p13	chr7:99548382-99548431
43308	ABCB6_01	ABCB6	ABCB6	NM_001349828.2,NM_005689.4	GRCh38.p13	chr2:219213945-219214163
39359	CD244_01	CD244	CD244	NM_016382.4,XM_011509622.2,XM_011509623.3,NM_001166663.2,XR_001737229.1,XM_011509621.2,NM_001166664.2	GRCh38.p13	chr1:160862796-160862830
35774	LHCGR_01	LHCGR	LHCGR	XM_017004089.1,XM_017004090.1,XM_006712015.3,XM_005264309.3,NM_000233.4,XM_011532831.1,XM_011532834.2	GRCh38.p13	chr2:48688345-48688394
45762	SNX9_01	SNX9	SNX9	NM_016224.5,XM_011535886.3,XM_005267015.2	GRCh38.p13	chr6:157909737-157909786
47972	MINDY3_01	MINDY3	MINDY3	XR_001747205.1,XR_428647.2,XM_011519690.2,NM_001318330.1,XM_017016671.1,XM_011519691.2,XR_930516.2,XM_011519694.1,XM_006717508.2,XM_017016675.1,XM_005252602.2,XR_001747206.1,XM_011519693.1,XR_001747207.1,XM_017016672.1,NM_024948.4,XM_017016673.1,XM_017016676.1,XM_005252600.2,XM_017016674.1	GRCh38.p13	chr10:15841472-15841521
45916	BFAR_01	BFAR	BFAR	NM_001330500.2,XM_005255350.2,NM_016561.3	GRCh38.p13	chr16:14664963-14665012
35383	ZNF148_01	ZNF148	ZNF148	NM_001348431.2,NM_001348434.2,NM_001348436.2,NM_001348430.2,NM_001348427.2,NM_001348428.2,NM_001348424.1,NM_021964.3,NM_001348429.2,NM_001348433.2,NM_001348425.2,NM_001348432.2,NM_001348426.2	GRCh38.p13	chr3:125313325-125313359
38927	LEUTX_01	LEUTX	LEUTX	NM_001382345.1,NM_001143832.2	GRCh38.p13	chr19:39784615-39784661
42138	MYOM1_01	MYOM1	MYOM1	NM_003803.4,XM_024451281.1,XR_935071.2,NM_019856.2,XM_017026062.1	GRCh38.p13	chr18:3126756-3126805
38763	TMEM229A_01	TMEM229A	TMEM229A	NM_001136002.2	GRCh38.p13	chr7:124031170-124031219
48824	CAMK2N2_01	CAMK2N2	CAMK2N2	NM_033259.3	GRCh38.p13	chr3:184259617-184259666
47540	EXO5_01	EXO5	EXO5	XM_017002099.2,NM_001346947.1,NM_001346949.1,NM_001346946.1,NM_001346948.1,NM_001346952.1,NM_001346953.1,NM_022774.2,XM_017002102.2,NM_001346954.1,NM_001346955.1,NM_001346950.1,NM_001346951.1,NM_001346956.1	GRCh38.p13	chr1:40514620-40514669
41310	MMP10_01	MMP10	MMP10	NM_002425.3	GRCh38.p13	chr11:102779685-102779734
49022	GLMN_01	GLMN	GLMN	XM_017000138.1,XM_017000139.1,NR_135089.1,NM_053274.3,NM_001319683.1,XM_017000142.1,XM_017000143.1,XM_017000144.1,XM_006710309.2,XR_002959248.1,XM_017000141.1,XR_002959249.1,XM_017000140.1,XM_011540546.2,XM_017000137.1,XM_005270401.3	GRCh38.p13	chr1:92271508-92271557
47262	ENPP5_01	ENPP5	ENPP5	XM_005249260.4,NM_001290072.2,NM_021572.5,XM_011514786.3,NM_001290073.1	GRCh38.p13	chr6:46160063-46160112
36010	IL6R_01	IL6R	IL6R	NM_001382769.1,XM_017001201.2,NM_001382770.1,NM_001206866.2,NM_001382771.1,NM_001382774.1,NM_181359.3,XM_017001199.2,NM_001382772.1,NM_001382773.1,NM_000565.4,XM_005245140.3,XM_005245139.2	GRCh38.p13	chr1:154434667-154435005
36122	CHRM4_01	CHRM4	CHRM4	NM_001366692.1,NM_000741.5	GRCh38.p13	chr11:46386458-46386507
35755	INS_01	INS	INS	NM_000207.3,NM_001185097.2,NM_001185098.2,NM_001291897.2	GRCh38.p13	chr11:2159851-2159885
48118	APOL4_01	APOL4	APOL4	XM_024452274.1,NM_145660.2,NM_030643.4	GRCh38.p13	chr22:36191295-36191344
48769	ZCCHC3_01	ZCCHC3	ZCCHC3	NM_033089.7	GRCh38.p13	chr20:299798-299843
42352	PRKAR2A_01	PRKAR2A	PRKAR2A	XR_002959547.1,XR_002959546.1,XM_011533942.3,NM_001321983.2,NM_001321982.2,NM_004157.4,NM_001321989.2,XM_011533943.2,XM_005265315.4	GRCh38.p13	chr3:48794021-48807659
34783	UGT2B7_01	UGT2B7	UGT2B7,UGT2B10	NM_001290091.2,NM_001349568.1,NM_001330719.1,XM_017008585.2,NM_001074.4,NM_001075.6,NM_001144767.3	GRCh38.p13	chr4:69112718-69112767,chr4:68830861-68830910
43968	TALDO1_01	TALDO1	TALDO1	NM_006755.2	GRCh38.p13	chr11:755994-758990
35582	KLRD1_01	KLRD1	KLRD1	XM_011520650.2,NM_001114396.2,NM_002262.5,XM_017019289.2,XM_011520651.3,NR_147040.2,XM_017019285.2,XM_024448974.1,NR_147039.2,NM_001351063.2,XM_017019288.2,XM_017019286.1,NR_147038.2,XM_006719067.4,NM_001351060.1,XR_001748696.2,NM_001351062.1,XM_017019287.1,NM_007334.2,XR_001748697.2	GRCh38.p13	chr12:10313479-10313513
38010	FBF1_01	FBF1	FBF1	NM_001319193.1	GRCh38.p13	chr17:75933022-75933071
51771	HNRNPH1_01	HNRNPH1	HNRNPH1	NM_001364248.2,NM_001364246.2,NM_001364247.2,NM_001364244.2,NM_001364251.2,NM_001364240.2,NM_001364245.2,NM_001364243.2,NM_001364241.2,NM_001364252.2,NM_001364234.1,NM_005520.3,NM_001364242.2,NM_001364229.2,NM_001364225.1,NM_001364233.1,NM_001364255.2,NM_001364236.2,NM_001257293.2,NM_001364254.2,NM_001364226.1,NM_001364231.2,NM_001364230.2,NM_001364232.2,NM_001364239.2,NM_001364238.2,NM_001364227…	GRCh38.p13	chr5:179620923-179620972
39628	CTCF_01	CTCF	CTCF	NM_001191022.2,NM_001363916.1,XM_005255775.4,NM_006565.4,XM_017022868.1	GRCh38.p13	chr16:67616850-67620717
50985	TMPRSS11B_01	TMPRSS11B	TMPRSS11B	XM_011531608.2,NM_182502.3,XM_011531609.1	GRCh38.p13	chr4:68231373-68232413
36123	CHRNA2_01	CHRNA2	CHRNA2	NM_001282455.2,NM_001347708.2,NM_001347705.2,XM_011544389.2,NM_000742.4,NM_001347706.2,NM_001347707.2	GRCh38.p13	chr8:27478892-27478941
34970	HEXD_01	HEXD	HEXD	XR_430031.3,NM_001369488.1,XM_011523560.2,XR_430030.3,NM_001369487.1,XM_011523561.2,NM_173620.3,XM_024450705.1,XM_006722280.3,XR_001752496.1,XM_005256346.3,XM_017024484.1,NM_001330542.2	GRCh38.p13	chr17:82440613-82441035,chr17:82440334-82441035,chr17:82439713-82441035
34410	DUXB_01	DUXB	DUXB	NM_001351309.2,NM_001351308.2,NM_001351307.2	GRCh38.p13	chr16:75696069-75696113
51667	DBF4B_01	DBF4B	DBF4B	XM_017025146.1,XM_017025148.2,XM_017025149.2,XM_006722102.3,XR_001752645.2,NM_145663.3,XM_017025150.2,XM_017025147.1,XM_006722098.3,NM_025104.4,NR_148207.2,NR_148206.2,XM_017025155.1,XM_017025154.1,XM_017025156.2,XM_011525281.2,NR_036623.2,XM_017025153.1,XM_017025152.1,XM_017025145.2,XM_017025151.2,XM_024450953.1	GRCh38.p13	chr17:44723009-44729940
47004	DISP3_01	DISP3	DISP3	NM_020780.2,XM_011541828.3,XM_011541835.2,XM_011541831.2,XR_946717.2,XM_011541830.2,XM_011541829.1,XM_011541833.2,XR_001737342.1,XM_011541832.2	GRCh38.p13	chr1:11515443-11515487
48136	HMGN5_01	HMGN5	HMGN5	NM_030763.3	GRCh38.p13	chrX:81121554-81121603
42016	OFD1_01	OFD1	OFD1	XM_011545592.3,XM_017029909.1,NM_003611.3,XM_024452470.1,XM_024452469.1,XM_011545597.2,NM_001330210.1,XM_024452471.1,XM_005274606.4,NM_001330209.1,XM_024452468.1,XM_011545594.3,XM_011545595.1,XM_011545598.1,XM_017029911.1	GRCh38.p13	chrX:13760462-13760511
43606	NTF4_01	NTF4	NTF4	XR_001753693.1,XM_006723232.3,NM_006179.4,XM_011527008.2,XM_011527009.2,XR_001753694.1,XM_005258962.3,XM_011527010.2	GRCh38.p13	chr19:49061140-49061189
38105	TMEM184A_01	TMEM184A	TMEM184A	XM_011515165.2,XM_006715653.1,XM_017011815.2,XM_011515166.2,XM_006715655.2,XR_001744577.2,NM_001097620.2,XM_011515164.1	GRCh38.p13	chr7:1550952-1555269
41675	SRSF2_01	SRSF2	SRSF2	NM_001195427.2,XM_017024942.2,XR_429914.4,XR_002958053.1,XR_429913.4,XR_002958054.1,XR_002958055.1,NR_036608.2,NM_003016.4	GRCh38.p13	chr17:76736264-76736313
44101	ADAMTS1_01	ADAMTS1	ADAMTS1	NM_006988.5	GRCh38.p13	chr21:26838048-26838097
46461	ABCF3_01	ABCF3	ABCF3	NM_018358.2,NM_001351298.1,XM_024453625.1,NM_001351300.1,NM_001351299.1,XM_024453624.1	GRCh38.p13	chr3:184191043-184191171
43170	GNPDA1_01	GNPDA1	GNPDA1	XM_006714747.2,XM_011537537.1,NM_005471.5,XM_005268348.1,XM_024454319.1	GRCh38.p13	chr5:142000893-142000942
45588	PCF11_01	PCF11	PCF11	NM_015885.4,NM_001346413.2,XR_001747906.1,NM_001346415.2,NM_001346414.2,XR_001747905.1	GRCh38.p13	chr11:83169291-83169340
43934	SMR3B_01	SMR3B	SMR3B	NM_006685.4	GRCh38.p13	chr4:70390172-70390221
36886	BCAP29_01	BCAP29	DUS4L-BCAP29,BCAP29	NM_001371366.2,NM_001363483.2,NM_001371356.1,NM_001363482.1,NM_001371357.1,NR_163928.1,NR_163927.1,NR_163926.1,NR_163941.2,NR_163929.1,NR_163930.1,NR_163933.1,NR_163931.1,NR_163936.1,NR_163937.1,NR_163932.1,NM_001371365.2,NM_018844.4,NR_027830.2,NR_163934.1,NR_163935.1,NR_163940.2,NR_163939.2,NM_001008405.4,NM_001371353.1,NR_163938.1,NM_001371364.2,NM_001371367.2,NM_001371354.1,NM_001371355.1	GRCh38.p13	chr7:107600489-107613364
44891	IL37_01	IL37	IL37	XM_011510964.3,XM_011510963.3,NM_173204.2,NM_014439.4,NM_173202.2,NM_173203.2,NM_173205.2	GRCh38.p13	chr2:112917674-112917713
37662	ZNF765_01	ZNF765	ZNF765	NM_001040185.3,NM_001350495.1	GRCh38.p13	chr19:53407993-53408042
43814	MCAM_01	MCAM	MCAM	XM_017017762.2,NM_006500.3,XM_017017760.2,XM_017017759.2,XM_017017761.2	GRCh38.p13	chr11:119309274-119309323
40214	PCED1A_01	PCED1A	PCED1A	NM_001271168.2,XM_005260806.4,XM_005260805.3,NM_022760.6,XM_005260804.2	GRCh38.p13	chr20:2838413-2838451
39697	PDZD7_01	PDZD7	PDZD7	XM_017016668.2,XM_011540183.3,NM_024895.4,XR_945816.3,NM_001195263.2,XM_005270165.3,XM_011540179.3,XM_011540178.3,NM_001351044.1,XR_001747203.2,XM_011540181.3,XM_011540177.3,XM_017016667.2	GRCh38.p13	chr10:101022260-101022294
51108	FRMD7_01	FRMD7	FRMD7	XM_017029947.2,NM_001306193.1,NM_194277.3	GRCh38.p13	chrX:132094127-132097302,chrX:132094127-132099470
35462	LIN54_01	LIN54	LIN54	XM_005262750.4,NR_110253.2,XM_017007728.1,XM_017007729.1,NM_001115007.3,NM_001288997.1,XM_006714081.3,NM_001115008.3,XM_017007730.1,NM_001288996.2,NM_194282.4,NR_110254.2	GRCh38.p13	chr4:82931051-82931086
50372	UBR3_01	UBR3	UBR3	XR_922841.2,XM_006712270.3,XM_005246300.4,XM_017003358.1,XM_006712271.4,XM_017003357.1,XM_006712268.4,XM_017003356.2,NM_172070.4,XM_005246299.4,XM_006712269.3,XM_011510604.2	GRCh38.p13	chr2:169986741-169986790
43248	NFIB_01	NFIB	NFIB	NM_001369463.1,NM_001369462.1,NM_005596.3,XR_001746308.2,XR_001746309.2,XM_006716773.3,NM_001282787.1,NM_001369471.1,NM_001369476.1,NM_001369469.1,NM_001369468.1,NM_001369465.1,NM_001369464.1,NM_001369458.1,NM_001369459.1,NM_001369477.1,NM_001369480.1,NM_001369467.1,NM_001369474.1,NM_001369475.1,XM_005251467.3,NR_161384.1,XM_005251471.3,NM_001369478.1,NM_001369479.1,NR_161385.1,XM_006716774.3,NM_…	GRCh38.p13	chr9:14086077-14086126
42845	ETV1_01	ETV1	ETV1	NM_001370556.1,XM_011515167.3,XM_024446679.1,NM_001163152.1,NM_001163147.1,NR_120445.1,NM_004956.5,XM_024446677.1,NM_001370555.1,XM_024446676.1,NM_001163151.1,XM_011515170.3,NM_001163148.1,NM_001163150.1,NM_001163149.1,XM_011515168.3,XM_024446678.1,XM_005249635.5	GRCh38.p13	chr7:13906460-13906509
47251	PRM3_01	PRM3	PRM3	NM_021247.3	GRCh38.p13	chr16:11273472-11273516
45008	PHF14_01	PHF14	PHF14	NR_033435.2,NM_001007157.2,NM_014660.4,NR_033436.2	GRCh38.p13	chr7:11022966-11028716
49148	SRSF12_01	SRSF12	SRSF12	NM_080743.5,XM_011535483.2,NM_001376896.1,NM_001376898.1,NM_001376897.1,XM_017010292.1	GRCh38.p13	chr6:89098876-89098925
39614	MCIDAS_01	MCIDAS	MCIDAS	XM_017009439.2,NM_001190787.3	GRCh38.p13	chr5:55219725-55219774
41135	HRC_01	HRC	HRC	NM_002152.3,XM_017026733.2	GRCh38.p13	chr19:49154973-49155008
45893	CLEC1A_01	CLEC1A	CLEC1A	NM_001297749.2,NM_016511.4,NM_001297751.2,NM_001297750.2,XM_011520687.2,NM_001297748.2	GRCh38.p13	chr12:10071395-10071435
49185	ASB11_01	ASB11	ASB11	NM_080873.3,NM_001012428.2,NM_001201583.2	GRCh38.p13	chrX:15283441-15283490
38039	ZNF133_01	ZNF133	ZNF133	NM_001352453.1,NM_001352456.2,NM_001352457.2,NM_001283000.2,NM_001352450.2,NM_001283001.3,NM_001352454.2,NM_001352455.2,NM_001352458.2,NM_001352461.2,NM_001352459.2,XM_017028048.1,NM_001352460.2,NM_001283004.3,XM_024451995.1,XM_024451992.1,XM_024451993.1,XM_011529339.1,XM_011529337.1,XM_024451994.1,XM_017028041.1,NM_001283008.3,XM_024451991.1,NM_001283002.3,NM_001282996.3,NM_003434.7,XM_017028042…	GRCh38.p13	chr20:18315458-18315507
40486	DYNLRB2_01	DYNLRB2	DYNLRB2	XM_006721295.3,NR_130943.2,XM_011523370.2,XM_006721296.3,NM_001305017.1,NR_130942.2,NM_130897.3	GRCh38.p13	chr16:80543351-80549532,chr16:80547847-80549532,chr16:80549483-80549532
42129	MBTPS1_01	MBTPS1	MBTPS1	XM_024450477.1,XM_017023816.2,XM_017023817.2,NM_003791.4	GRCh38.p13	chr16:84087460-84090923
49240	AMOT_01	AMOT	AMOT	NM_133265.3,NM_001113490.1,XM_005262090.1,XM_011530875.2,XM_005262087.1,XM_017029289.1	GRCh38.p13	chrX:112777771-112777820
50139	MFSD8_01	MFSD8	MFSD8	NM_001371592.1,NM_001371594.1,NM_152778.3,XM_005262898.3,NM_001371595.1,XM_024453982.1,XR_001741194.1,NM_001371591.1,NM_001363521.2,XR_001741195.1,XM_017007989.1,NM_001363520.2,XR_001741199.1,NM_001371596.2,XR_001741198.2,XR_001741196.1,XM_024453983.1,XM_011531832.1,XR_001741197.1,NM_001371593.1,NM_001371590.1	GRCh38.p13	chr4:127920732-127920766
46790	NT5M_01	NT5M	NT5M	XM_005256734.3,XM_017024879.1,XM_011523967.2,XM_011523962.2,XM_011523963.1,XM_011523966.1,XM_005256731.3,NM_020201.4,XM_005256732.3,XM_011523965.2,XM_005256737.1,XM_005256733.3,XM_011523964.2	GRCh38.p13	chr17:17306621-17323196
41900	VDAC2_01	VDAC2	VDAC2	NM_001324087.1,NM_001184823.1,NM_001324090.1,NM_003375.4,NM_001324088.1,NM_001184783.2,NM_001324089.1	GRCh38.p13	chr10:75219068-75219117
41269	MAFK_01	MAFK	MAFK	NM_002360.4,XM_005249851.2,XM_006715773.2	GRCh38.p13	chr7:1539200-1539955
37496	RGL3_01	RGL3	RGL3	NM_001035223.4,NM_001161616.3	GRCh38.p13	chr19:11405191-11405331
48024	RUBCNL_01	RUBCNL	RUBCNL	NM_001286764.3,NM_001286765.2,NM_001286761.2,NM_001349772.2,NM_025113.5,NM_001286766.2,NM_001286762.3,NM_001286763.3	GRCh38.p13	chr13:46359596-46361454
38463	MYO7A_01	MYO7A	MYO7A	XM_011545044.2,XR_001747888.1,XR_001747889.1,XR_001747885.1,XR_001747886.1,XM_011545050.2,XR_001747887.1,XM_017017784.1,NM_001127180.2,XM_017017778.1,XM_017017779.1,XM_017017783.1,XM_017017782.1,XM_017017781.1,XM_017017780.1,NM_001369365.1,XM_011545046.2,XM_017017788.1,XM_017017787.1,XM_017017786.1,NM_000260.4,XM_017017785.1	GRCh38.p13	chr11:77160272-77161006
37682	FABP6_01	FABP6	FABP6	NM_001040442.1,NM_001445.3,NM_001130958.2	GRCh38.p13	chr5:160232235-160232273
47654	SMIM2_01	SMIM2	SMIM2	NM_024058.3	GRCh38.p13	chr13:44160743-44160792
44826	SMPX_01	SMPX	SMPX	NR_045617.2,NM_014332.3	GRCh38.p13	chrX:21737604-21737653
35763	KCNA1_01	KCNA1	KCNA1	NM_000217.3	GRCh38.p13	chr12:4916334-4916383
46075	HAUS6_01	HAUS6	HAUS6	NM_017645.5,NM_001270890.2	GRCh38.p13	chr9:19102810-19102859
35442	MRPS11_01	MRPS11	MRPS11	NR_135918.2,NM_001321973.2,NM_001321972.2,NM_176805.4,NM_022839.5,NM_001321976.2,NR_135917.2,NM_001321970.2,NR_135915.2,NM_001321974.2	GRCh38.p13	chr15:88467960-88467994
47569	PCDH20_01	PCDH20	PCDH20	NM_022843.3	GRCh38.p13	chr13:61412429-61412478
40375	SCML4_01	SCML4	SCML4	XM_017010679.1,XM_011535709.2,XM_011535704.2,XM_011535710.2,XM_017010685.1,XM_017010677.1,NM_198081.5,XM_017010683.1,XM_011535706.1,NM_001286409.2,XM_017010687.1,XM_017010682.2,XM_017010686.1,NM_001286408.2,XM_017010681.1,XM_017010680.1,XM_011535703.2,XM_017010678.1	GRCh38.p13	chr6:107705268-107705311
39815	NAA80_01	NAA80	NAA80	NM_001200016.2,NM_001200018.2,NM_012191.4	GRCh38.p13	chr3:50296536-50296573
50435	WDR88_01	WDR88	WDR88	XM_011526449.2,XM_011526450.2,XM_017026282.1,NM_173479.4,XM_017026283.1,NR_135565.2	GRCh38.p13	chr19:33148814-33148863
51748	NT5DC4_01	NT5DC4	NT5DC4	XM_017005477.1,XM_024452801.1,XM_024452800.1,XM_011512265.2,XR_002959273.1,XM_024452803.1,XR_002959272.1,XM_024452802.1,XM_024452807.1,XM_011512262.2,XM_024452806.1,XR_002959271.1,XM_024452805.1,XR_002959270.1,XM_017005478.1,XM_024452804.1,XM_024452809.1,XR_002959267.1,XM_024452808.1,XM_017005475.1,XM_024452810.1,XR_002959277.1,XR_002959276.1,XR_002959268.1,XR_002959269.1,NM_001350494.2,XM_017005…	GRCh38.p13	chr2:112722574-112722747
35331	BLOC1S2_01	BLOC1S2	BLOC1S2	NM_001282437.1,NM_001282438.1,NM_001282439.1,XM_017016102.1,NM_173809.5,NM_001001342.2,NM_001282436.1	GRCh38.p13	chr10:100280181-100280222
11352	ALG10B_01	ALG10B	ALG10B	NM_001013620.4,XM_005268665.4,NM_001308340.2	GRCh38.p13	chr12:38326064-38326098
36325	STX16_01	STX16	STX16	NR_037941.2,NM_001134773.3,NM_001134772.3,NM_003763.6,NR_037943.2,NR_037942.2,NM_001204868.2,NM_001001433.3	GRCh38.p13	chr20:58677404-58677443
46569	UNC45A_01	UNC45A	UNC45A	XM_024449985.1,XM_005254963.4,NM_001323620.1,NM_001323619.1,XM_024449986.1,NM_001323621.1,XM_024449983.1,XM_017022407.2,NM_001039675.1,NM_018671.5,XM_011521780.3,XM_024449984.1	GRCh38.p13	chr15:90939734-90939770
42992	CEBPD_01	CEBPD	CEBPD	NM_005195.4	GRCh38.p13	chr8:47737176-47737211
45718	CPQ_01	CPQ	CPQ	NM_016134.4	GRCh38.p13	chr8:96785322-96835013
49531	L3HYPDH_01	L3HYPDH	L3HYPDH	XR_943383.2,NR_138572.1,XR_943384.3,XM_024449462.1,NM_144581.2,NM_001331164.2,NR_138574.1,NM_001331158.1,NM_001331159.1,NR_138571.1,NR_138575.2	GRCh38.p13	chr14:59475927-59475976
49646	ARL13B_01	ARL13B	ARL13B	NM_144996.4,XM_011512534.2,NR_135621.2,XM_011512535.2,NR_033427.2,NM_001321328.2,XM_006713532.3,NM_001174151.1,NM_182896.3,XM_011512532.2,NM_001174150.2,XM_017005853.1,XM_011512533.2	GRCh38.p13	chr3:94050828-94050872
13151	S100P_01	S100P	S100P	NM_005980.3	GRCh38.p13	chr4:6696988-6697027
39159	ANPEP_01	ANPEP	ANPEP	NM_001381923.1,NM_001381924.1,NM_001150.3	GRCh38.p13	chr15:89791022-89791068
47180	MRPL23_01	MRPL23	LOC107987373,MRPL23	XM_011520275.2,XM_017030111.1,XM_006718271.2,NM_021134.4,XM_011520276.3,XM_011520273.1,XM_006724896.2	GRCh38.p13	chr11:1951011-1952154
37903	FAM155A_01	FAM155A	FAM155A	NM_001080396.3,XM_011521109.3	GRCh38.p13	chr13:107170599-107170648
13293	SMUG1_01	SMUG1	SMUG1	XM_024448913.1,NM_001351255.1,NM_001351254.1,NM_001351247.1,NM_001351257.1,NM_001351237.2,NM_001351253.1,XM_011538112.2,NM_001351256.1,NM_001351252.1,NM_001351260.1,NM_001351249.1,NM_014311.2,NM_001351261.2,NM_001351251.1,NM_001351250.1,NM_001351262.1,NM_001243789.2,NM_001243788.1,NM_001351242.1,NM_001351243.1,XR_002957303.1,NM_001243787.1,NM_001351238.2,NM_001243790.2,NM_001351240.2,NM_001243791…	GRCh38.p13	chr12:54182518-54182552
47661	TMEM38A_01	TMEM38A	TMEM38A	NM_024074.4	GRCh38.p13	chr19:16686382-16688169
35876	XDH_01	XDH	XDH	XM_011533096.2,XM_011533095.2,NM_000379.4	GRCh38.p13	chr2:31377134-31377183
39334	POU6F2_01	POU6F2	POU6F2	NM_001166018.2,NM_007252.4,NM_001370959.1	GRCh38.p13	chr7:39464578-39464627
44686	WDR37_01	WDR37	WDR37	NM_014023.4	GRCh38.p13	chr10:1129585-1129634
36978	PIK3R6_01	PIK3R6	PIK3R6	XM_017024230.1,XM_011523686.2,XM_011523683.2,XR_001752434.1,XM_011523680.2,NM_001290211.1,NM_001010855.4,XM_011523681.3,XM_017024228.1,XM_011523677.2,XM_017024229.1,XM_011523678.2,XM_024450613.1,XM_017024231.1,NR_110865.1	GRCh38.p13	chr17:8828923-8828957
41984	OR1E1_01	OR1E1	OR1E2,OR1E1	NM_003553.3,NM_003554.2	GRCh38.p13	chr17:3433640-3433689,chr17:3398209-3398258
49785	SEPTIN3_01	SEPTIN3	SEPTIN3	NM_145733.3,NM_001363845.2,NM_019106.5	GRCh38.p13	chr22:41992748-41994308
12572	MRPL17_01	MRPL17	MRPL17	NM_022061.4	GRCh38.p13	chr11:6682295-6682334
39785	EPB41L2_01	EPB41L2	EPB41L2	XR_001743215.2,NM_001350315.1,NM_001350314.1,NM_001350311.1,NM_001350310.1,XM_011535525.2,NM_001135555.3,NM_001350313.1,NM_001350312.1,XR_001743213.2,NM_001350308.1,NM_001350309.1,XM_017010364.1,XM_011535527.2,NM_001199388.2,XM_011535524.2,NM_001431.4,NM_001350304.1,NM_001350305.1,XM_017010356.2,NM_001350299.1,XM_024446349.1,XM_011535528.2,NM_001350306.1,NM_001350307.1,NM_001350302.1,NM_001350303…	GRCh38.p13	chr6:130885214-130885263
45386	ICE1_01	ICE1	ICE1	NM_015325.3,XM_011513999.2,XM_017009285.2,XR_001742051.1	GRCh38.p13	chr5:5460511-5460560
41912	WNT2_01	WNT2	WNT2	NR_024047.2,NM_003391.3	GRCh38.p13	chr7:117277474-117277523
41325	MSX2_01	MSX2	MSX2	NM_001363626.2,NM_002449.5	GRCh38.p13	chr5:174724652-174724701
49496	STXBP5_01	STXBP5	STXBP5	NM_139244.4,XM_017010268.2,XM_011535453.1,XM_006715339.3,XR_245504.2,XR_001743163.2,NM_001127715.2,XR_245502.3,XR_002956261.1	GRCh38.p13	chr6:147239220-147239269
42382	SLC28A2_01	SLC28A2	SLC28A2	XM_011522198.2,XM_011522201.2,XM_011522200.2,NM_004212.4,XM_011522202.2,XM_011522199.1	GRCh38.p13	chr15:45269450-45269499
46423	GBP3_01	GBP3	GBP3	NR_135007.1,XM_017001013.1,XM_005270743.2,XM_017001014.1,NM_001319181.1,NM_001319180.1,NM_018284.3,NM_001319179.1,XM_011541234.2,XM_006710574.3,XM_011541233.1	GRCh38.p13	chr1:89022735-89022777
40113	UBE2V1_01	UBE2V1	UBE2V1,PEDS1-UBE2V1	NM_001282578.3,NM_001257395.2,NM_199144.3,NM_199203.3,NM_001257394.2,NM_001257393.2,NM_001282577.3,NM_001282576.1,NM_001257397.2,NM_022442.6,NM_001257396.2,NM_001257399.2,NM_001257398.1,NM_001282575.3,NR_047554.2,NM_001032288.3,NM_001282579.1,NM_021988.6	GRCh38.p13	chr20:50082812-50082861
35256	ZNF174_01	ZNF174	ZNF174	NM_001347870.2,NM_001347868.2,NM_001032292.2,NM_001347869.2,NM_003450.3	GRCh38.p13	chr16:3402330-3402364
46643	ETAA1_01	ETAA1	ETAA1	XM_017004376.1,XM_017004377.1,NM_019002.4	GRCh38.p13	chr2:67403538-67403587
38709	IHO1_01	IHO1	IHO1	XM_011533672.2,XM_011533673.2,XM_006713124.3,XM_011533671.2,XM_011533670.2,NM_001135197.2,NM_178173.3	GRCh38.p13	chr3:49257263-49257312
45150	RAB11FIP2_01	RAB11FIP2	RAB11FIP2	NM_014904.3,XM_017015926.1,NM_001330167.1	GRCh38.p13	chr10:118040219-118040268
35414	ZFAND4_01	ZFAND4	ZFAND4	NM_001128324.2,XR_001747264.1,XR_001747265.1,XM_017016937.2,NR_104256.1,XM_011540368.1,XR_001747262.1,XR_001747263.1,XM_017016935.1,XM_017016946.2,XR_001747259.1,XM_017016944.1,XM_017016940.2,XM_017016941.1,XM_024448260.1,XM_017016934.1,XM_024448259.1,XM_017016942.1,XR_001747260.1,XM_017016943.1,XR_001747261.2,NM_174890.4,XM_017016933.2,XM_017016932.1,XM_005271844.4,NM_001282906.1,XM_005271843.2,…	GRCh38.p13	chr10:45639826-45639860
42112	BECN1_01	BECN1	BECN1	XM_017025262.2,XM_005257760.4,NM_003766.4,NM_001313998.2,NM_001313999.1,XM_005257759.3,XM_017025264.2,XM_017025263.2,NM_001314000.1,XM_011525421.2	GRCh38.p13	chr17:42816011-42818226
49300	ACTRT1_01	ACTRT1	ACTRT1	NM_138289.4	GRCh38.p13	chrX:128051049-128051098
43347	CEBPZ_01	CEBPZ	CEBPZ	NM_005760.3	GRCh38.p13	chr2:37228463-37228505
40697	FABP5_01	FABP5	FABP5P3,FABP5	NR_002935.1,NM_001444.3	GRCh38.p13	chr8:81283389-81283438,chr7:152442645-152442694
50857	PLD6_01	PLD6	PLD6	NM_178836.4,XM_017024310.2	GRCh38.p13	chr17:17202032-17202081
48437	PLXNA1_01	PLXNA1	PLXNA1	NM_032242.3,XM_011512908.2	GRCh38.p13	chr3:127035347-127035386
44769	VAMP2_01	VAMP2	VAMP2	NM_001330125.1,NM_014232.3	GRCh38.p13	chr17:8159773-8159814
47006	SYT4_01	SYT4	SYT4	NM_020783.4	GRCh38.p13	chr18:43268518-43268567
46053	DIRAS2_01	DIRAS2	DIRAS2	NM_017594.5	GRCh38.p13	chr9:90613044-90613082
38674	NFIA_01	NFIA	NFIA	XM_011541515.3,NM_001134673.4,NM_001145511.2,NM_005595.5,XM_011541512.3,XM_017001362.2,XM_017001363.1,NM_001145512.2,XM_011541514.3	GRCh38.p13	chr1:61332538-61352450
37223	C2orf76_01	C2orf76	C2orf76	XM_017003354.2,NM_001322330.1,NM_001322332.1,NM_001322331.2,XR_001738623.2,NM_001322329.1,NM_001017927.3	GRCh38.p13	chr2:119311679-119317490
50026	RNF217_01	RNF217	RNF217	NM_001286398.2,NM_152553.5,XR_942305.3,XM_011535500.2,XM_011535494.2,XR_001743179.1,XM_011535496.2,NR_136734.1,NR_104440.3	GRCh38.p13	chr6:125083336-125083385
50322	PHF13_01	PHF13	PHF13	NM_153812.3,XM_011540762.1	GRCh38.p13	chr1:6622694-6622743
42565	HNRNPAB_01	HNRNPAB	HNRNPAB	NM_004499.4,NM_031266.3	GRCh38.p13	chr5:178207225-178209368
36108	CACNA1D_01	CACNA1D	CACNA1D	XM_017007145.1,XM_017007140.1,XM_005265448.3,NM_000720.4,XM_017007141.1,XM_017007143.1,XM_011534094.2,XM_017007139.1,XM_011534100.2,NM_001128839.3,XM_011534097.2,XM_017007142.1,NM_001128840.3,XM_011534099.2,XM_017007138.1,XM_017007137.1,XM_017007144.1,XM_011534096.2	GRCh38.p13	chr3:53800298-53800347
44284	MMRN1_01	MMRN1	MMRN1	NM_001371403.1,NM_007351.3,XM_005262856.3	GRCh38.p13	chr4:89951736-89953030
40923	CEBPG_01	CEBPG	CEBPG	NM_001252296.1,NM_001806.4,XM_024451327.1	GRCh38.p13	chr19:33379681-33379730
35023	EPB41L5_01	EPB41L5	EPB41L5	NM_001184938.4,XM_006712651.1,NR_138472.2,NM_020909.4,XM_017004567.1,NM_001184939.3,NM_001330307.2,XM_006712653.1,NM_001330310.2,NR_135920.3,NM_001184937.2	GRCh38.p13	chr2:120077027-120077064
44337	CBX5_01	CBX5	CBX5	NM_001127321.1,NM_001127322.1,NM_012117.3	GRCh38.p13	chr12:54241780-54241829
50460	C11orf42_01	C11orf42	C11orf42	XM_011519927.3,XM_011519926.3,NM_173525.3	GRCh38.p13	chr11:6210103-6210137
45694	STYXL1_01	STYXL1	STYXL1	XM_017012299.1,XM_017012300.1,NM_001317785.2,NR_134487.1,XM_017012296.1,XM_017012302.1,XM_017012297.1,NM_001317789.1,XM_011516293.3,NM_001317787.2,NR_134486.2,NM_001317788.2,XM_011516300.1,NM_001317786.2,XM_011516292.3,NM_016086.2,XM_017012298.2,XM_017012301.2	GRCh38.p13	chr7:75996531-75996578
45812	ZNF274_01	ZNF274	ZNF274	NM_001278734.1,XM_017026174.1,NM_016325.3,XM_017026175.1,NM_016324.3,XR_001753588.2,XR_001753589.2,NM_133502.3,XM_011526327.1,XM_011526328.2	GRCh38.p13	chr19:58212399-58212448
34444	DUSP14_01	DUSP14	DUSP14	XM_005256977.3,XM_011524234.1,NM_007026.4	GRCh38.p13	chr17:37512823-37512857
38462	PIGG_01	PIGG	PIGG	NR_144332.1,NM_001345987.1,XM_011513490.3,XR_001741255.2,XM_011513491.2,XR_001741254.2,NR_144333.1,NM_017733.4,NR_144330.1,XR_001741253.2,XR_002959738.1,NM_001289051.1,NR_144334.1,NR_144331.1,NM_001289055.1,XR_924967.3,XR_924969.3,XR_001741261.2,XR_001741251.2,NM_001289053.1,XR_924965.3,NR_144328.1,NM_001289057.1,NR_144329.1,XM_011513494.3,NR_144326.1,NM_001345994.1,NM_001345988.1,NM_001345989.2,…	GRCh38.p13	chr4:500454-500503
36535	SPDYE3_01	SPDYE3	SPDYE3	XM_011516235.3,XM_011516234.3,NM_001004351.5	GRCh38.p13	chr7:100319656-100319705
37279	VNN3_01	VNN3	VNN3	NM_001368152.1,NM_001368149.1,NM_001368154.1,NM_001368155.1,NM_001368150.1,NM_001291702.2,NM_001368151.1,NM_001291703.2,NM_001368156.1	GRCh38.p13	chr6:132724636-132724680
37839	SLC38A1_01	SLC38A1	SLC38A1	XM_011538784.2,NM_001278388.2,NM_001278389.2,NM_001278390.1,XM_011538787.2,NM_030674.4,NM_001278387.2,XM_011538786.2,XM_017019990.1,NM_001077484.2	GRCh38.p13	chr12:46198650-46198699
48959	SLITRK1_01	SLITRK1	SLITRK1	NM_052910.2,NM_001281503.2	GRCh38.p13	chr13:83880209-83880258
46659	HMGCLL1_01	HMGCLL1	HMGCLL1	NM_001042406.2,NM_001287753.1,NR_109867.1,XM_011514700.3,NR_109869.1,NM_001287746.1,NM_019036.2,NM_001287741.1	GRCh38.p13	chr6:55578957-55579003
36109	CACNA1E_01	CACNA1E	CACNA1E	NM_001205294.2,XM_017002244.1,XM_017002245.1,XM_017002248.1,NM_000721.4,XM_017002249.1,XM_017002250.1,XM_017002246.1,NM_001205293.3,XM_017002247.1,XM_017002251.1,XM_017002243.1	GRCh38.p13	chr1:181801182-181801231
50396	PSENEN_01	PSENEN	PSENEN	NM_001281532.3,NM_172341.4	GRCh38.p13	chr19:35745977-35746453
40850	BCL6_01	BCL6	BCL6	NM_001130845.2,NM_001706.5,NM_001134738.1,XM_011513062.3,XM_005247694.4	GRCh38.p13	chr3:187729957-187730006
51398	MBLAC2_01	MBLAC2	MBLAC2	NM_203406.2	GRCh38.p13	chr5:90461508-90461551
37347	KIAA1755_01	KIAA1755	KIAA1755	NM_001029864.2,XM_024452010.1,NM_001348708.2,NR_145960.2,XM_024452009.1,XM_024452008.1,XM_024452012.1,XM_024452013.1	GRCh38.p13	chr20:38211397-38211446
46063	CNNM3_01	CNNM3	CNNM3	XR_001738701.2,NM_017623.5,XR_001738700.2,XM_017003800.2,NM_199078.3,XR_244887.5,XR_001738702.2	GRCh38.p13	chr2:96833089-96833138
42904	RAD23A_01	RAD23A	RAD23A	NR_072976.1,NM_001270363.1,NM_005053.4,NM_001270362.1,XM_024451631.1	GRCh38.p13	chr19:12953004-12953051
48458	SLC37A3_01	SLC37A3	SLC37A3	NR_156490.1,NM_207113.3,NM_001363374.1,NM_032295.3,NR_156491.1,NM_001363376.1,NM_001363373.1,NR_156492.1,NM_001363378.1,NM_001287498.1,NR_156489.1,NM_001363377.1,NM_001363375.1	GRCh38.p13	chr7:140335372-140335419
51799	SLC17A4_01	SLC17A4	SLC17A4	XM_024446294.1,XR_925998.1,XM_011514215.2,XR_925999.1,XM_017010151.1,XM_024446295.1,XM_017010150.1,XM_011514214.2,NM_001286121.1,XR_925997.1,XM_024446297.1,XM_024446296.1,NM_005495.3,XR_925996.1,XM_011514211.1	GRCh38.p13	chr6:25770156-25770205
49439	FAM3D_01	FAM3D	FAM3D	XM_005264863.4,XM_011533352.2,XM_011533351.2,XM_011533354.2,XM_005264862.4,XM_011533350.2,NM_138805.3,XM_011533348.2,XM_006712965.3,XM_011533349.3,XM_005264864.4,XM_011533353.2,XM_006712967.3	GRCh38.p13	chr3:58636354-58636403
39543	IGLL5_01	IGLL5	IGLL5	NM_001178126.2,NM_001256296.2	GRCh38.p13	chr22:22895784-22895833
39201	MGAT4A_01	MGAT4A	MGAT4A	NM_001160154.1,NM_012214.3	GRCh38.p13	chr2:98619452-98619501
49920	MAB21L3_01	MAB21L3	MAB21L3	XM_011540625.2,XM_011540623.2,XM_011540626.2,NM_152367.3	GRCh38.p13	chr1:116133886-116133935
35859	ABCC8_01	ABCC8	ABCC8	XM_017018199.1,XM_017018202.1,NR_147094.2,NM_001287174.2,NM_001351297.2,NM_001351296.2,XM_017018197.2,XR_001747946.2,XM_017018201.2,XM_017018204.1,XM_024448668.1,XR_002957189.1,XR_001747945.2,NM_001351295.2,NM_000352.6	GRCh38.p13	chr11:17430840-17430889
11434	BCDIN3D_01	BCDIN3D	BCDIN3D	NM_181708.3	GRCh38.p13	chr12:49838462-49838497
44877	EIF2AK1_01	EIF2AK1	EIF2AK1	NM_001134335.1,NM_014413.4,XM_024446718.1	GRCh38.p13	chr7:6026819-6026868
48563	LYZL1_01	LYZL1	LYZL1,LYZL2	XR_428650.1,NM_183058.3,XR_930469.2,XM_011519306.2,XM_005252627.3,NM_032517.6,XM_017016791.1,XM_011519307.2	GRCh38.p13	chr10:29291950-29291999,chr10:30626784-30626833
45467	SYF2_01	SYF2	SYF2	NM_015484.5,NM_207170.4	GRCh38.p13	chr1:25227499-25228133
40608	SMIM27_01	SMIM27	SMIM27	NM_001349118.1,NM_001349119.2,XM_024447368.1	GRCh38.p13	chr9:32552859-32552903
38920	TPCN1_01	TPCN1	TPCN1	XM_017019480.2,XR_001748766.2,XR_001748765.2,NM_001143819.3,NM_017901.6,XR_001748767.2,XM_011538490.2,XM_017019482.2,XM_011538493.2,NM_001301214.1,XM_011538492.2,NM_001351347.1,NM_001351346.2	GRCh38.p13	chr12:113276937-113276986
51718	CLASRP_01	CLASRP	CLASRP	NR_103529.2,XM_011526397.3,NM_001278439.2,XM_011526396.2,XR_002958247.1,NM_007056.3	GRCh38.p13	chr19:45059341-45060401
51894	ADH1B_01	ADH1B	ADH1C,ADH1B	NR_133005.2,NM_001286650.2,NM_000668.6,NM_000669.5	GRCh38.p13	chr4:99316264-99318056,chr4:99345228-99347016
39839	UBE2E1_01	UBE2E1	UBE2E1	NM_003341.5,NM_001202476.2,NM_182666.3	GRCh38.p13	chr3:23891190-23891239
47544	MPHOSPH9_01	MPHOSPH9	MPHOSPH9	XR_001748540.1,XM_017018675.1,XR_001748541.1,XR_001748542.1,XM_017018681.1,XM_017018674.1,XR_001748539.1,NR_103517.2,XM_017018673.1,XM_017018676.1,NM_022782.4,XM_024448794.1,XR_001748543.1,XM_011537740.2,XM_017018678.1,XM_017018677.1,XM_017018680.1,XM_011537741.2,XM_017018679.1	GRCh38.p13	chr12:123161237-123161286
50401	DAOA_01	DAOA	DAOA	NM_001161812.1,NM_001384644.1,NM_001384645.1,NM_172370.5,NM_001161814.1,NM_001384646.1	GRCh38.p13	chr13:105472576-105472625
47144	RAP2A_01	RAP2A	RAP2A	NM_021033.7	GRCh38.p13	chr13:97464396-97464445
45198	HMGXB3_01	HMGXB3	HMGXB3	XR_001742043.2,NM_014983.3,NM_001366501.2	GRCh38.p13	chr5:150030807-150032466
12522	METTL7A_01	METTL7A	METTL7A	NM_014033.4	GRCh38.p13	chr12:50925156-50925196
48028	FUZ_01	FUZ	FUZ	XM_011527347.1,XR_001753765.1,XM_011527341.2,XM_011527340.1,XR_002958363.1,XM_024451729.1,XR_001753764.1,NM_001363663.1,NM_001352262.2,XR_002958364.1,XM_011527346.1,XR_002958365.1,XM_011527343.1,XR_935863.1,XM_011527342.2,XR_935862.1,NM_001171937.2,NM_025129.5,XM_017027322.2,XM_017027323.1,XM_017027320.1,XM_017027321.1,XM_006723399.3,NR_033269.2,XM_011527345.1,XM_024451730.1	GRCh38.p13	chr19:49811439-49811644
34966	POLD1_01	POLD1	POLD1	XM_017026882.2,NM_002691.4,NR_046402.2,XR_935835.2,NM_001308632.1,XM_005259008.4,XM_017026881.1,NM_001256849.1,XM_011527038.1	GRCh38.p13	chr19:50403546-50403585
46309	HAUS2_01	HAUS2	HAUS2	NM_018097.3,NM_001323630.2,NM_001323629.1,NM_001323631.2,XM_017022397.1,NM_001323632.2,XM_017022396.1,NM_001130447.2	GRCh38.p13	chr15:42548886-42548921
35812	PEPD_01	PEPD	PEPD	NM_001166056.2,NM_000285.4,NM_001166057.2	GRCh38.p13	chr19:33401843-33411693
43337	ARIH1_01	ARIH1	ARIH1	NM_005744.5	GRCh38.p13	chr15:72555331-72555868
11572	CCN3_01	CCN3	CCN3	NM_002514.4	GRCh38.p13	chr8:119423030-119423064
50817	ACTL9_01	ACTL9	ACTL9	NM_178525.5	GRCh38.p13	chr19:8697650-8697692
47680	SMIM7_01	SMIM7	SMIM7	NM_024104.4,XR_001753760.2,XR_244085.3,XR_001753759.2,XR_001753761.2,XR_244084.4,XR_244083.3,NM_001300925.2,XR_244086.4	GRCh38.p13	chr19:16660096-16660143
42688	PRPF3_01	PRPF3	PRPF3	NR_146767.1,NR_146768.1,NR_146766.1,XR_001737540.2,XR_921998.3,NM_001350529.1,XR_002958010.1,XR_001737541.2,XR_921997.3,XR_002958012.1,NM_004698.4,XR_002958009.1,XR_001737537.2,NR_146769.1,XM_017002790.1,XR_241103.3,XR_001737536.2,XM_011510130.3	GRCh38.p13	chr1:150352931-150352971
45185	CEP164_01	CEP164	CEP164	XM_017017382.1,XM_017017369.1,XM_017017368.1,XM_017017381.1,XM_017017365.1,XM_017017364.1,XR_428971.3,XM_017017367.1,XM_017017366.1,XM_017017379.1,NM_001271933.1,XR_001747794.1,XM_005271453.1,XM_005271456.1,XM_005271457.1,XM_011542674.1,XR_001747793.1,XM_017017378.1,XM_017017372.1,XR_002957132.1,NM_014956.5,XM_017017370.1,XM_017017371.1,XM_006718794.1,XM_006718788.1,XM_017017380.1,XM_017017376.1,…	GRCh38.p13	chr11:117338606-117338655
35909	KRT10_01	KRT10	KRT10	NM_001379366.1,NM_000421.5	GRCh38.p13	chr17:40820323-40820372
11768	CYP4F2_01	CYP4F2	CYP4F2	NM_001082.5	GRCh38.p13	chr19:15879790-15879824
37403	ERGIC1_01	ERGIC1	ERGIC1	XM_017009654.1,XM_011534597.1,XM_017009655.1,XM_011534598.3,XM_024446135.1,NM_001031711.3,XR_001742159.2	GRCh38.p13	chr5:172888743-172897023
45836	ARID4B_01	ARID4B	ARID4B	NM_016374.6,NM_001206794.1,XR_002956802.1,XM_006711781.3,XM_011544212.3,NR_135074.2,NM_031371.4,XR_001737227.2,XR_001737226.2,XM_024447628.1,XM_024447626.1,XM_017001472.1	GRCh38.p13	chr1:235182081-235182130
45141	FILIP1L_01	FILIP1L	FILIP1L	NM_001370247.1,NM_001042459.2,NM_001282794.1,NM_182909.3,XM_011512371.2,NM_001282793.1,NM_014890.3	GRCh38.p13	chr3:99848937-99848986
39955	NXT2_01	NXT2	NXT2	XM_017029648.2,XM_011530989.2,NM_001242618.2,NM_018698.5,NM_001242617.2	GRCh38.p13	chrX:109541562-109541611
11789	DDX56_01	DDX56	DDX56	NM_019082.3,NM_001257189.1	GRCh38.p13	chr7:44568909-44568943
52020	PAGE5_01	PAGE5	PAGE5	NM_001013435.3,NM_130467.5	GRCh38.p13	chrX:55220354-55220388
44865	ANKRD1_01	ANKRD1	ANKRD1	NM_014391.3	GRCh38.p13	chr10:90918888-90918937
51127	VAPA_01	VAPA	VAPA	XM_024451287.1,XM_011525769.3,NM_003574.6,XM_017026079.1,NM_194434.3	GRCh38.p13	chr18:9950442-9950481
49490	HOPX_01	HOPX	HOPX	NM_001145460.1,XM_017008730.2,XM_006714052.2,XM_017008734.1,NM_001145459.1,XM_017008731.2,NM_139212.3,NM_139211.4,NM_032495.6,XM_017008729.2,XM_017008728.1,XM_017008732.1,XM_017008733.1	GRCh38.p13	chr4:56655870-56655904
46878	ASPHD2_01	ASPHD2	ASPHD2	NM_020437.5	GRCh38.p13	chr22:26444525-26444574
39076	C17orf107_01	C17orf107	C17orf107	NM_001145536.2	GRCh38.p13	chr17:4901354-4901398
40705	FOXJ1_01	FOXJ1	FOXJ1	NM_001454.4	GRCh38.p13	chr17:76138065-76138108
37559	RGS21_01	RGS21	RGS21	NM_001039152.3	GRCh38.p13	chr1:192317102-192343022
47961	NUP210_01	NUP210	NUP210	XM_024453414.1,NM_024923.4,XM_024453411.1,XM_024453416.1,XM_024453413.1,XM_024453412.1,XM_024453415.1	GRCh38.p13	chr3:13316479-13316513
45526	TCTN3_01	TCTN3	TCTN3	XM_024447935.1,XM_011539628.2,XM_011539627.2,XM_005269690.2,NM_001143973.1,NM_015631.6	GRCh38.p13	chr10:95693003-95693366
35140	ALAD_01	ALAD	ALAD	XR_002956764.1,XM_011518364.2,NM_000031.6,NM_001317745.1,NM_001003945.2,XM_024447449.1	GRCh38.p13	chr9:113390857-113390894
47887	DNAI4_01	DNAI4	DNAI4	XM_024449816.1,NM_207014.3,XM_024449817.1,XM_017002355.1,XM_011542162.2,XM_024449821.1,XM_024449820.1,XM_017002353.1,NM_024763.5,XM_017002354.1,XM_017002357.1,XM_005271212.3,XM_011542161.2	GRCh38.p13	chr1:66837767-66840488
36608	OR4M2_01	OR4M2	OR4M2,OR4M1	NM_001004719.2,XM_017021339.1,XM_017021338.1	GRCh38.p13	chr15:22080590-22080639,chr14:19780288-19780337
51026	ANKRD42_01	ANKRD42	ANKRD42	NM_001300976.2,NM_001300973.2,NM_001300977.2,NM_001300975.2,NR_125355.2,NM_001300972.2,NM_182603.4	GRCh38.p13	chr11:83211381-83211430
38788	LAX1_01	LAX1	LAX1	NM_001136190.2,NM_017773.4,NM_001282878.1,XM_006711397.3	GRCh38.p13	chr1:203771394-203771443
41866	TUB_01	TUB	TUB	NM_003320.4,XM_005253109.3,XM_011520344.2,NM_177972.3	GRCh38.p13	chr11:8103039-8103088
39892	GSG1_01	GSG1	GSG1	NM_001367363.2,NM_001367358.2,XM_011520862.1,NM_001367362.2,XM_011520861.2,XM_011520860.1,NM_001367360.2,NM_001080555.4,NM_001080554.4,NM_001367364.2,NM_001206843.3,NM_001367361.2,NM_031289.5,NM_001206842.3,XM_011520858.1,XM_011520863.2,NM_001368007.2,NM_153823.5,NM_001206845.3,NM_001367359.2	GRCh38.p13	chr12:13084853-13084892
36080	ADRB1_01	ADRB1	ADRB1	NM_000684.3	GRCh38.p13	chr10:114044854-114044891
34634	SEC24D_01	SEC24D	SEC24D	XM_005263379.3,XM_017008875.1,XM_024454293.1,NM_014822.4,NM_001318066.2	GRCh38.p13	chr4:118740677-118740713
42763	STOML1_01	STOML1	STOML1	NM_001256675.2,NM_001256677.1,NM_001256674.2,XM_024450109.1,NM_001324228.2,NM_001256673.1,NM_001256672.2,NM_001324229.2,XM_005254792.5,NM_001256676.1,NM_004809.5,NM_001324230.2,NM_001324226.1,NM_001324227.1	GRCh38.p13	chr15:73990403-73990444
51835	NMU_01	NMU	NMU	NM_001292045.2,NR_120489.2,NM_001292046.2,XM_011534368.3,XM_011534367.2,NM_006681.4	GRCh38.p13	chr4:55599150-55600539
46032	PARP14_01	PARP14	PARP14	XM_011512929.2,XR_002959544.1,XM_011512928.3,NM_017554.3	GRCh38.p13	chr3:122680991-122681027
41442	PFKFB1_01	PFKFB1	PFKFB1	NM_002625.4,NM_001271804.2,XM_024452389.1,XM_017029578.1,NR_073450.2,XM_017029577.1,NM_001271805.1,XM_017029576.1	GRCh38.p13	chrX:54956198-54956247
34902	C1orf116_01	C1orf116	C1orf116	XM_005273259.1,NM_023938.6,XM_011509973.2,XM_006711530.1,NM_001083924.2	GRCh38.p13	chr1:207022739-207022773
13442	THAP10_01	THAP10	THAP10	NM_020147.4	GRCh38.p13	chr15:70892194-70892231
49062	OLFM2_01	OLFM2	OLFM2	NM_001304347.2,NM_001304348.2,NM_058164.4	GRCh38.p13	chr19:9854812-9854851
38473	AURKAIP1_01	AURKAIP1	AURKAIP1	NM_017900.3,NM_001127229.2,NM_001127230.2,XM_011541670.3,XM_024447924.1	GRCh38.p13	chr1:1373772-1373808
50442	MROH2B_01	MROH2B	MROH2B	XM_011513953.1,XM_011513952.1,NM_173489.5	GRCh38.p13	chr5:41032753-41032802
46524	ITFG2_01	ITFG2	ITFG2	XM_017019641.1,XM_005253709.4,XR_002957351.1,XR_002957354.1,XR_002957355.1,XR_001748811.2,NR_147202.2,NM_018463.4,XR_001748810.2,XR_002957352.1,XR_002957353.1,XR_002957356.1,XM_005253707.5,XR_001748812.1,XR_002957357.1,XR_002957358.1,XM_024449057.1,XR_002957359.1,NR_130744.3,XR_002957360.1	GRCh38.p13	chr12:2822856-2822905
42802	MPDU1_01	MPDU1	MPDU1	NM_001330073.1,XM_011524081.2,XM_006721598.3,NM_004870.4,XM_006721597.2,XM_024451040.1,NR_024603.1	GRCh38.p13	chr17:7587817-7587866
46987	SERINC1_01	SERINC1	SERINC1	NM_020755.4	GRCh38.p13	chr6:122458646-122471712
34830	SLC25A42_01	SLC25A42	SLC25A42	NM_001321544.2,XM_017026670.2,NM_178526.5,XM_005259861.3,XM_011527937.2	GRCh38.p13	chr19:19107948-19107983
45770	PADI3_01	PADI3	PADI3	XM_017001463.1,XM_011541571.2,NM_016233.2	GRCh38.p13	chr1:17283380-17283429
39297	C6orf132_01	C6orf132	C6orf132	NM_001164446.3	GRCh38.p13	chr6:42103387-42103436
40449	LYPLAL1_01	LYPLAL1	LYPLAL1	XM_017000271.2,NM_001350628.1,XR_001736964.2,NM_001300772.1,XR_002959345.1,XR_001736967.2,NM_138794.5,NM_001300769.1,XR_001736963.2,XR_001736966.2,XM_017000272.1,NM_001300770.1,NM_001300771.1,XM_011509183.2,NM_001350629.1,XR_001736965.2,XR_001736968.2	GRCh38.p13	chr1:219210643-219211536
41168	ACO1_01	ACO1	ACO1	NM_001362840.2,NM_002197.3,NM_001278352.1,XM_011517888.2	GRCh38.p13	chr9:32408573-32408622
47566	METTL4_01	METTL4	METTL4	XM_011525730.3,NM_001308401.2,XR_243813.4,NM_022840.5,XM_005258132.4,XR_001753260.2,XM_005258133.3	GRCh38.p13	chr18:2567617-2571160
37534	DEFB107A_01	DEFB107A	DEFB107B,DEFB107A	NM_001037668.1,NM_001040705.2	GRCh38.p13	chr8:7509191-7509240,chr8:7811791-7811840
40535	COX4I1_01	COX4I1	COX4I1	NM_001318788.2,NM_001318786.2,NM_001318794.2,XM_024450156.1,NM_001318802.2,NM_001318797.2,NM_001861.6	GRCh38.p13	chr16:85801202-85801249,chr16:85799882-85801249,chr16:85799750-85801249
49927	C1orf131_01	C1orf131	C1orf131	NM_152379.4,NM_001300830.2	GRCh38.p13	chr1:231226809-231227000
44798	HABP4_01	HABP4	HABP4	XM_017014484.1,XR_001746249.1,NM_014282.4,XM_005251812.3	GRCh38.p13	chr9:96490097-96490146
48272	SOX7_01	SOX7	SOX7	NM_031439.4	GRCh38.p13	chr8:10724249-10724298
45077	EFCAB14_01	EFCAB14	EFCAB14	NM_014774.3	GRCh38.p13	chr1:46718471-46718520
40121	FBXO16_01	FBXO16	FBXO16	NM_001258211.1,NM_172366.4	GRCh38.p13	chr8:28429383-28447198
38284	SH2D5_01	SH2D5	SH2D5	XM_011541460.2,XM_011541461.2,XM_011541462.2,XM_011541459.2,NM_001103160.2,NM_001103161.2	GRCh38.p13	chr1:20720225-20720271
50090	PRIMPOL_01	PRIMPOL	PRIMPOL	NM_001345894.2,XR_002959718.1,XM_011531726.3,XR_002959719.1,NM_001345895.2,XM_017007868.2,NM_001345899.2,XM_024453929.1,NM_001300767.2,NM_001345893.2,XM_024453932.1,XM_024453933.1,NM_152683.4,NM_001345898.2,XM_011531723.1,NM_001345901.2,NM_001345892.2,XM_024453930.1,XM_024453931.1,XM_024453934.1,XR_002959717.1,NM_001345891.2,NM_001300768.2,XM_024453928.1,XM_011531724.3,XM_011531725.1,NM_001345896…	GRCh38.p13	chr4:184672315-184672364
36202	GSTM2_01	GSTM2	GSTM2	NM_001142368.1,NM_000848.4	GRCh38.p13	chr1:109669511-109669548
45710	IRAK4_01	IRAK4	IRAK4	NM_001145258.1,NM_001145256.1,NM_001145257.1,NM_001351345.1,NM_001351344.1,NM_016123.4,XM_011538433.2,XM_006719440.2,XM_011538431.2,NM_001351343.1,NM_001351342.1,NM_001351338.1,NM_001351341.1,NM_001351340.1,NM_001114182.2,XM_005268949.2,XM_005268944.4,XM_006719442.2,NM_001351339.1,XM_006719438.3,XM_005268945.4,XM_017019390.2,XM_005268943.3	GRCh38.p13	chr12:43787507-43787556
51283	SIAH3_01	SIAH3	SIAH3	NM_198849.3	GRCh38.p13	chr13:45781260-45781309
44922	HPGDS_01	HPGDS	HPGDS	NM_014485.3,XM_005262932.3	GRCh38.p13	chr4:94299641-94302191
37758	IQCJ_01	IQCJ	IQCJ	NM_001197100.1,NM_001042705.2	GRCh38.p13	chr3:159265577-159265626
38572	ATF7_01	ATF7	ATF7-NPFF,ATF7	NM_001366555.2,NM_001366562.1,NM_001206683.1,NM_001206682.1,NM_001366558.2,NR_159377.1,NM_001366556.2,NM_006856.3,NM_001366560.1,NM_001366559.1,NM_001130060.2,NR_073163.2	GRCh38.p13	chr12:53552541-53552590
36003	VHL_01	VHL	VHL	NM_000551.4,NM_198156.3,NM_001354723.2	GRCh38.p13	chr3:10150392-10150440
46995	RTL9_01	RTL9	RTL9	NM_001385449.1,NM_020769.2,XM_011530998.2,XM_011530999.2,XM_017029694.1,XM_017029695.1	GRCh38.p13	chrX:110454444-110454487
39197	LPO_01	LPO	LPO	NM_001160102.1,NR_027647.2,XM_011524810.2,XM_011524808.2,NM_006151.3	GRCh38.p13	chr17:58266185-58266228
40337	PRKG2_01	PRKG2	PRKG2	XM_017008417.1,XM_017008416.1,NM_001282483.1,NM_001282482.1,XM_017008415.1,XM_017008414.1,NM_001282481.1,NM_001282485.2,NM_001282480.1,NM_006259.2,XM_017008413.1,NM_001363401.2	GRCh38.p13	chr4:81110455-81110504
43120	PRKAB2_01	PRKAB2	PRKAB2	NR_103870.2,XR_001737291.2,NR_103871.2,XR_001737292.2,XM_017001697.2,NM_005399.5,XM_011509729.2	GRCh38.p13	chr1:147158829-147158878
43799	IVNS1ABP_01	IVNS1ABP	IVNS1ABP	XM_011509079.3,NM_006469.5,XM_017000084.1,XM_011509080.3,XM_005244843.3	GRCh38.p13	chr1:185299823-185299872
44366	FBXO3_01	FBXO3	FBXO3	XM_011519982.1,XM_011519981.3,XM_011519980.2,NM_033406.3,NM_012175.4,XM_017017533.2	GRCh38.p13	chr11:33770803-33774415
49539	GTSF1_01	GTSF1	GTSF1	XR_944498.1,XR_944499.2,XR_944500.2,XM_024448834.1,NM_144594.3,XM_017018800.2	GRCh38.p13	chr12:54463211-54463260
45751	TRAPPC2L_01	TRAPPC2L	TRAPPC2L	NM_001318526.2,NM_001318530.2,NR_134670.2,NM_001318527.2,NM_001318528.2,NM_001318529.2,NR_134671.1,XM_017023270.1,NM_001318524.2,NM_001318532.2,NM_001318525.2,NM_016209.5	GRCh38.p13	chr16:88859955-88860927
39313	PRKAR1B_01	PRKAR1B	PRKAR1B	NM_001164761.1,NM_002735.2,NM_001164760.2,XM_011515446.2,NM_001164758.1,NM_001164759.1,NM_001164762.1,XM_017012433.1	GRCh38.p13	chr7:550418-550457
50784	LCE3A_01	LCE3A	LCE3D,LCE3E,LCE3A,LCE3C	NM_032563.2,NM_178435.4,NM_178431.1,XM_011509484.1,NM_178434.3	GRCh38.p13	chr1:152622874-152622914,chr1:152565970-152566010,chr1:152579698-152579738,chr1:152600936-152600976
40078	E2F8_01	E2F8	E2F8	NM_001256371.1,NM_001256372.1,XR_930907.2,XM_011520367.1,NM_024680.4	GRCh38.p13	chr11:19225863-19229501
51752	GOLGA6L2_01	GOLGA6L2	GOLGA6L2	NM_001304388.2	GRCh38.p13	chr15:23443872-23443911
43785	PRPF8_01	PRPF8	PRPF8	XM_024450537.1,NM_006445.4	GRCh38.p13	chr17:1677673-1678545
42731	GPR37L1_01	GPR37L1	GPR37L1	NM_004767.5	GRCh38.p13	chr1:202123516-202123565
48153	ITFG1_01	ITFG1	ITFG1	NM_030790.5,NM_001305002.1	GRCh38.p13	chr16:47260653-47311246
38951	TLE6_01	TLE6	TLE6	XM_024451724.1,XM_024451723.1,XM_024451722.1,XM_005259645.2,XM_011528301.2,XM_011528300.2,NM_001143986.2,NM_024760.3	GRCh38.p13	chr19:2994054-2994902
47666	METTL16_01	METTL16	METTL16	XM_024450928.1,XM_005256801.3,XM_017025046.1,NM_024086.4	GRCh38.p13	chr17:2420811-2420860
48986	ACSM1_01	ACSM1	ACSM1	NR_134918.1,XM_017022915.1,XM_024450148.1,XM_011545732.2,XR_950737.3,XR_243258.3,XM_006721018.2,XM_011545729.3,XM_011545731.2,XR_429672.3,XR_001751827.2,NM_052956.3,NM_001318890.1,XM_011545730.3,XM_006721016.3,XR_001751828.2,XR_950738.3,XM_017022914.2,XM_006721017.3	GRCh38.p13	chr16:20661862-20669864
43746	ENOX2_01	ENOX2	ENOX2	NM_001382517.1,NM_001382520.1,XM_017029227.1,XM_011531247.2,NM_006375.3,NM_001382516.1,XM_017029228.1,NM_001382522.1,XM_011531251.2,NM_001281736.1,XM_011531245.2,XM_011531249.2,NM_001382518.1,NM_182314.2,NM_001382519.1,NM_001382521.1	GRCh38.p13	chrX:130679748-130688911
41059	GABPA_01	GABPA	GABPA	XM_011529521.3,XM_024452062.1,NM_001197297.2,XM_017028313.2,NM_002040.4,XM_011529520.3,XM_005260938.5	GRCh38.p13	chr21:25758080-25758129
46292	ARHGEF40_01	ARHGEF40	ARHGEF40	XM_017021437.2,XM_005267844.3,XM_011536937.3,XM_017021434.2,NM_001278529.2,XM_017021435.2,NM_001278530.2,NM_018071.5,XM_017021436.2	GRCh38.p13	chr14:21089150-21089194
43122	PTPN14_01	PTPN14	PTPN14	NM_005401.5,XM_017001941.1,XM_024448759.1	GRCh38.p13	chr1:214369561-214369610
41204	KCNS3_01	KCNS3	KCNS3	NM_001282428.1,XM_011532825.1,NM_002252.5	GRCh38.p13	chr2:17931479-17931528
44795	MGAT4B_01	MGAT4B	MGAT4B	XM_024454349.1,XM_024454347.1,NM_054013.3,NM_014275.5,XM_024454348.1	GRCh38.p13	chr5:179798588-179798973
39471	GOLGA3_01	GOLGA3	GOLGA3	NM_001172557.2,XM_006719737.3,XM_006719736.3,XM_024448941.1,XM_024448940.1,XM_005266167.4,XM_005266164.4,XM_024448943.1,NM_005895.4,XM_011534793.2,XM_024448942.1,XM_024448939.1	GRCh38.p13	chr12:132808290-132808337
51258	ENHO_01	ENHO	ENHO	NM_198573.3	GRCh38.p13	chr9:34521586-34521623
47068	CIP2A_01	CIP2A	CIP2A	XM_011513056.1,XM_006713716.3,NM_020890.3,XM_006713717.2,XM_011513057.2	GRCh38.p13	chr3:108551261-108551310
40111	DCSTAMP_01	DCSTAMP	DCSTAMP	XM_011517321.1,XM_011517324.1,XM_024447290.1,NM_030788.4,XM_024447288.1,NM_001257317.1,XM_024447289.1	GRCh38.p13	chr8:104349014-104349063
42207	EIF2B5_01	EIF2B5	EIF2B5	XM_011513266.3,XR_001740352.2,XM_011513265.1,NM_003907.3,XR_924208.2,XR_001740353.2	GRCh38.p13	chr3:184140099-184140148
40193	TAF11_01	TAF11	TAF11	NM_001270488.1,NM_005643.4,XM_011514827.2	GRCh38.p13	chr6:34878541-34878590
43691	TSG101_01	TSG101	TSG101	XM_005253108.4,NM_006292.4	GRCh38.p13	chr11:18480540-18480589
38475	SLC39A10_01	SLC39A10	SLC39A10	XM_011511505.3,XM_011511507.2,XM_011511506.3,XM_017004523.1,XM_005246689.4,NM_020342.3,XM_017004522.2,NM_001127257.2,XM_011511504.2	GRCh38.p13	chr2:195680617-195680666
40004	STARD13_01	STARD13	STARD13	NM_001243476.3,NM_001243466.2,XM_024449429.1,XM_017020835.2,NM_052851.3,XM_011535299.3,NM_001243474.1,XM_017020834.2,NM_178006.4,NM_178007.3	GRCh38.p13	chr13:33129124-33129173
43862	CSPG5_01	CSPG5	CSPG5	NM_001206942.1,NM_001206945.1,NM_001206944.1,NM_006574.4,NM_001206943.2	GRCh38.p13	chr3:47576901-47576940
3290	GLI1_01	GLI1	GLI1	NM_001167609.1,NM_001160045.1,XM_011538189.2,NM_005269.3,XM_011538190.2	GRCh38.p13	chr12:57464825-57464867
35529	NEK10_01	NEK10	NEK10	XM_024453374.1,XM_006712998.2,XM_006712999.3,XM_017005769.1,XM_017005771.2,NM_001304384.1,XM_006712997.3,XM_017005770.2,NM_152534.4,XM_017005773.1,XM_017005768.1,XM_017005766.2,XM_017005767.2,XM_017005764.1,XM_017005765.1,XR_001740034.1,XM_017005761.2,XM_017005772.2,XM_006713001.3,XM_017005762.2,XM_017005763.1,NM_001031741.3,XM_024453373.1	GRCh38.p13	chr3:27192077-27192115
49460	HLTF_01	HLTF	HLTF	XM_011513092.2,XM_011513093.2,NM_001318935.2,NM_001318934.1,XM_011513091.2,XM_017007078.1,NM_139048.3,NM_003071.4,XM_017007079.2	GRCh38.p13	chr3:149030711-149030760
47096	CPNE5_01	CPNE5	CPNE5	NM_001376891.1,NM_001376894.1,XR_002956291.1,NM_001376889.1,NM_001376888.1,NM_001314020.2,NM_001314018.1,NM_020939.2,NM_001314019.2,XR_002956290.1,XM_005249247.2,NM_001376890.1	GRCh38.p13	chr6:36741109-36741158
36385	OR13C4_01	OR13C4	OR13C4	NM_001001919.1	GRCh38.p13	chr9:104526344-104526393
41508	PRKCA_01	PRKCA	PRKCA	XM_017024837.1,XM_017024836.2,XM_024450829.1,XR_001752558.1,XM_024450830.1,XM_017024841.1,NM_002737.3	GRCh38.p13	chr17:66688302-66688351
41739	UAP1_01	UAP1	UAP1	NM_001324113.1,NM_001324116.1,NM_001324117.1,XM_011509914.2,NM_003115.4,NM_001324114.1,NM_001324115.1,XM_011509913.2	GRCh38.p13	chr1:162579584-162581316
41321	MSR1_01	MSR1	MSR1	NM_002445.4,XM_024447161.1,NM_138716.2,NM_138715.3,NM_001363744.1	GRCh38.p13	chr8:16168860-16175225
39643	DIDO1_01	DIDO1	DIDO1	XM_011528507.1,XM_011528508.1,NM_080797.4,XM_011528509.2,NM_001193369.2,XM_011528504.1,NM_001193370.2,XM_011528505.2,NM_080796.3,NM_022105.4,NM_033081.2	GRCh38.p13	chr20:62914310-62914359
47191	COTL1_01	COTL1	COTL1	NM_021149.5	GRCh38.p13	chr16:84566173-84566222
44283	PHLDA1_01	PHLDA1	PHLDA1	NM_007350.3	GRCh38.p13	chr12:76030927-76030961
48054	C16orf70_01	C16orf70	C16orf70	XM_011523350.3,NM_025187.5,NM_001320542.2,NM_001320541.2,XM_006721284.3,XM_017023731.1,NM_001320540.2,XM_017023730.1,XM_017023729.1,NM_001320543.2	GRCh38.p13	chr16:67120144-67120193
34482	TRAPPC6A_01	TRAPPC6A	TRAPPC6A	NM_001270893.2,NM_001270891.2,NM_024108.3,NM_001270892.2,XM_017027295.2	GRCh38.p13	chr19:45164906-45164941
35896	GLB1_01	GLB1	GLB1	NM_001135602.2,NM_001317040.1,NM_001079811.2,NM_000404.4	GRCh38.p13	chr3:33051775-33051908
43958	DNAJB2_01	DNAJB2	DNAJB2	NM_006736.6,NM_001039550.2	GRCh38.p13	chr2:219283151-219283200
36392	AFAP1L2_01	AFAP1L2	AFAP1L2	XM_005270233.4,NM_001287824.1,NM_001351080.1,NM_032550.3,XM_017016810.1,XM_017016832.1,XM_017016798.2,XM_017016796.1,XM_005270241.4,XM_017016829.1,XM_017016830.1,XM_017016818.1,XM_017016831.1,XM_017016795.1,NM_001351071.1,XM_017016814.1,NM_001351070.1,NM_001351068.1,NM_001351069.1,NM_001351065.1,NM_001351073.1,NM_001351072.1,NM_001351077.1,NM_001351066.1,NM_001351076.1,XM_017016797.1,NM_001351067…	GRCh38.p13	chr10:114302348-114302395
38199	CKMT2_01	CKMT2	CKMT2	NM_001099735.2,NM_001825.2,NM_001099736.1	GRCh38.p13	chr5:81259228-81263513
44621	ZNF222_01	ZNF222	ZNF222	XM_005259209.3,XM_005259208.3,NM_013360.2,NM_001129996.2	GRCh38.p13	chr19:44031975-44032024
42853	ICA1_01	ICA1	ICA1	NM_022307.3,NM_001350826.2,NR_146929.2,XM_017012116.1,NM_001350837.2,NM_001350832.2,NM_001350821.2,NM_001350833.2,NM_001350820.2,NR_146926.2,NM_001350830.2,NR_146927.2,NM_001350823.2,NM_001276478.2,NM_001136020.3,XM_011515347.3,XM_011515348.1,NR_146928.2,XM_011515349.1,NM_001350819.2,NM_001350831.2,NM_001350829.2,NM_001350825.2,NM_001350828.2,NM_001350836.2,NM_001350824.2,XM_024446741.1,XM_024446…	GRCh38.p13	chr7:8113905-8113954
51479	TMEM132E_01	TMEM132E	TMEM132E	NM_001304438.2	GRCh38.p13	chr17:34632719-34632764
12499	MARCKS_01	MARCKS	MARCKS	NM_002356.7	GRCh38.p13	chr6:113857756-113857790
35277	MELK_01	MELK	MELK	XM_011518079.1,XM_011518084.2,XM_011518081.2,XM_011518085.1,XM_011518083.2,XM_011518077.1,NR_046337.1,NM_001256687.1,NM_014791.4,XM_011518082.2,NM_001256690.1,XM_011518086.2,NM_001256688.1,XM_011518078.2,NM_001256689.1,XM_011518076.2,NM_001256685.1,NM_001256693.1,NM_001256692.1,XM_011518080.1,NM_001256691.1	GRCh38.p13	chr9:36599394-36599429
38782	R3HCC1_01	R3HCC1	R3HCC1	NR_125897.1,NM_001136108.3,NM_001301650.1	GRCh38.p13	chr8:23293316-23293361
43094	JUND_01	JUND	JUND	NM_001286968.2,NM_005354.6	GRCh38.p13	chr19:18280618-18280659
47370	NXF3_01	NXF3	NXF3	NM_022052.2	GRCh38.p13	chrX:103084793-103084842
49425	ZNF653_01	ZNF653	ZNF653	NM_138783.4	GRCh38.p13	chr19:11485687-11485736
49703	LRATD1_01	LRATD1	LRATD1	NR_144632.2,NM_145175.4,NM_001369364.1	GRCh38.p13	chr2:14634274-14634319
36980	C22orf42_01	C22orf42	C22orf42	XM_017028631.2,XM_011529922.3,XM_017028630.2,XM_017028629.2,XM_017028632.2,NM_001010859.3	GRCh38.p13	chr22:32159022-32159056
13552	TTC9_01	TTC9	TTC9	NM_015351.2	GRCh38.p13	chr14:70642491-70642525
43528	TCIRG1_01	TCIRG1	TCIRG1	XR_001747722.1,XM_024448322.1,NM_001351059.2,XR_001747721.2,XM_024448321.1,XM_024448320.1,NM_006053.3,XM_024448324.1,NM_006019.4,XR_002957115.1,XM_024448323.1,XR_001747723.2	GRCh38.p13	chr11:68048957-68049088
47504	VPS16_01	VPS16	VPS16	NM_080413.2,NM_022575.4	GRCh38.p13	chr20:2861002-2861039
39267	LRTM2_01	LRTM2	LRTM2	NM_001039029.3,NM_001163926.2,XM_011521015.1,NM_001163925.1,XM_017019848.1	GRCh38.p13	chr12:1835375-1835424
45391	NUDCD3_01	NUDCD3	NUDCD3	XM_011515247.2,XM_017011908.1,XM_017011910.1,NM_015332.4,XM_017011909.1	GRCh38.p13	chr7:44485238-44485533,chr7:44485238-44490411
43744	LRRC41_01	LRRC41	LRRC41	NM_006369.5,XR_002957994.1,XR_002957992.1	GRCh38.p13	chr1:46279574-46280200,chr1:46279574-46279623
36695	FRG2_01	FRG2	FRG2B,FRG2	NM_001005217.4,NM_001286820.2,NM_001080998.2	GRCh38.p13	chr4:190025845-190025894,chr10:133625383-133625432
40665	DPH1_01	DPH1	DPH1	NR_144475.1,NM_001346574.1,NR_144476.1,NM_001346575.1,NR_144474.1,NM_001383.6,NM_001346576.1	GRCh38.p13	chr17:2039819-2040262
45846	CWC15_01	CWC15	CWC15	NM_001363371.1,NM_001363372.1,NM_016403.4	GRCh38.p13	chr11:94966298-94966347
45275	FRMD4B_01	FRMD4B	FRMD4B	XM_017005996.1,XM_017005993.1,XM_017005992.1,XM_005264723.1,XM_017005995.1,XM_017005994.1,XM_017005991.1,XM_005264722.1,XM_017005990.1,NM_015123.3,XM_017005989.1,XM_017005997.1	GRCh38.p13	chr3:69181300-69181349
49385	CDAN1_01	CDAN1	CDAN1	XM_005254176.5,XM_011521271.2,XR_931757.2,NM_138477.4,XM_011521270.2,XR_001751105.1,XM_011521274.2,XR_001751104.1	GRCh38.p13	chr15:42735118-42735167
44797	DNAJC8_01	DNAJC8	DNAJC8	NR_159454.1,NM_014280.3	GRCh38.p13	chr1:28200648-28200692
48323	ANGPTL6_01	ANGPTL6	ANGPTL6	XR_002958369.1,XM_011528348.3,XM_011528349.3,XM_011528347.3,NM_001321411.1,XM_011528350.3,NM_031917.2,XM_017027347.2	GRCh38.p13	chr19:10093808-10093842
39349	SHMT2_01	SHMT2	SHMT2	XM_011538678.2,NR_029416.2,XM_011538677.3,XM_011538676.3,NR_029417.2,NM_001166358.2,NM_001166359.1,NM_001166356.2,NM_001166357.1,XM_011538675.3,NR_029415.1,NR_048562.1,NM_005412.6	GRCh38.p13	chr12:57234058-57234105
51007	ERICH6B_01	ERICH6B	ERICH6B	XM_011534965.2,XM_017020418.1,NM_182542.3	GRCh38.p13	chr13:45541496-45541545
13657	ZACN_01	ZACN	ZACN	NM_180990.4	GRCh38.p13	chr17:76079471-76079505
41385	OLR1_01	OLR1	OLR1	NM_001172633.1,NM_002543.4,NM_001172632.1	GRCh38.p13	chr12:10166855-10166904
46223	DENND4C_01	DENND4C	DENND4C	NM_001386047.1,XM_011517959.3,XM_006716807.4,NR_169854.1,NM_001386030.1,NM_001386040.1,XM_017014920.1,NM_001386041.1,NR_169842.1,NR_169853.1,NR_169852.1,NR_169844.1,NM_001386042.1,NR_169845.1,NM_001386043.1,NR_169843.1,NR_169849.1,NR_169846.1,NR_169847.1,NR_169848.1,XM_017014917.1,NM_001386032.1,NR_169851.1,NM_001386048.1,NM_001386039.1,NM_001386044.1,NR_169850.1,NM_001386045.1,NM_001386035.1,XM_…	GRCh38.p13	chr9:19316504-19316656
11706	COX10_01	COX10	COX10	NM_001303.4	GRCh38.p13	chr17:14192120-14192154
47149	GINS1_01	GINS1	GINS1	XR_244227.4,XM_017028162.1,NM_021067.5,XR_937180.2,NR_134574.1	GRCh38.p13	chr20:25417165-25418116
47835	SUV39H2_01	SUV39H2	SUV39H2	NM_001193427.1,NM_001193425.1,XM_011519662.2,XM_017016637.1,NM_024670.3,NM_001193426.1,NR_034181.1,XM_006717503.3,NM_001193424.2	GRCh38.p13	chr10:14903314-14903363
37094	ZNF260_01	ZNF260	ZNF260	NM_001166037.2,XM_017026741.1,NM_001166036.2,NM_001166038.2,NM_001375598.1,NM_001012756.3,NM_001375596.1,NM_001375597.1	GRCh38.p13	chr19:36514781-36514830
50061	TRIM60_01	TRIM60	TRIM60	NM_001258025.2,NM_152620.3,XM_011531683.2	GRCh38.p13	chr4:165041201-165041239
50516	FSIP2_01	FSIP2	FSIP2	NM_173651.4,XM_024452886.1	GRCh38.p13	chr2:185746695-185746741
51212	ZNF621_01	ZNF621	ZNF621	XM_017006226.2,XM_005265080.4,NM_001287245.1,XM_006713114.4,NM_198484.5,XM_011533610.3,NM_001098414.3,XM_005265079.4	GRCh38.p13	chr3:40532043-40532087
42528	ERH_01	ERH	ERH	NM_004450.3	GRCh38.p13	chr14:69394877-69398244
47573	CASD1_01	CASD1	CASD1	NM_001363428.1,XM_011516495.2,XM_006716093.3,XM_017012546.2,NM_022900.5,NM_001363427.1,NM_001363426.1	GRCh38.p13	chr7:94528212-94533215
44994	PPM1F_01	PPM1F	PPM1F	NM_014634.4,XM_011530556.1	GRCh38.p13	chr22:21920929-21920978
12168	H2BC18_01	H2BC18	H2BP1,H2BC18,H2BP2	NR_160915.1,NR_160914.1,NR_160942.1,NR_027337.2,NR_160913.1,NR_160944.2,NM_001161334.1,NM_001024599.5	GRCh38.p13	chr1:121117227-121117276,chr1:143904588-143904637,chr1:149812308-149812357
37743	CHD2_01	CHD2	CHD2	NM_001042572.3,NM_001271.4	GRCh38.p13	chr15:92939682-92941834
46012	TMED9_01	TMED9	TMED9	NM_017510.6	GRCh38.p13	chr5:177594204-177594243
39707	MPC1L_01	MPC1L	MPC1L	NM_001195522.2	GRCh38.p13	chrX:40624005-40624043
45161	NTNG1_01	NTNG1	NTNG1	XM_017000686.2,XM_017000683.2,NM_001113226.3,XM_011541025.2,NM_001372168.1,NM_001330665.2,NM_014917.4,NM_001372169.1,NM_001372166.1,NM_001372167.1,NM_001372171.1,NM_001312688.2,NM_001372170.1,NM_001113228.3	GRCh38.p13	chr1:107148202-107148251
44913	DIMT1_01	DIMT1	DIMT1	NM_014473.4,NM_001348076.2,NM_001348077.2	GRCh38.p13	chr5:62398836-62402039
50651	PAN3_01	PAN3	PAN3	XM_017020528.1,XR_941549.2,XM_017020533.1,XM_017020532.1,XM_005266334.1,XM_011535034.3,XM_017020529.2,NM_175854.8,XM_017020530.2,XM_011535032.3,XM_017020531.1,XM_005266333.3,XM_011535033.2,XM_005266332.3	GRCh38.p13	chr13:28260487-28260536
12533	MICB_01	MICB	MICB	NM_001289160.1,NM_001289161.2,NM_005931.5	GRCh38.p13	chr6:31506377-31506411
35903	IAPP_01	IAPP	IAPP	NM_001329201.1,NM_000415.3	GRCh38.p13	chr12:21378331-21378380
45276	GRAMD4_01	GRAMD4	GRAMD4	XM_006724170.4,NM_015124.5,NM_001366660.1,XM_006724169.1,XM_005261396.3,XM_011530011.1,XM_011530014.2,XM_011530012.1,XM_017028670.2	GRCh38.p13	chr22:46664097-46665640
36339	OR9A4_01	OR9A4	OR9A4	NM_001001656.3
49340	SHKBP1_01	SHKBP1	SHKBP1	XM_006723474.2,XM_011527493.2,XM_017027474.2,XM_011527492.2,NM_138392.4,XM_017027473.2,XM_006723475.2	GRCh38.p13	chr19:40580628-40580762
51556	CHKA_01	CHKA	CHKA	NM_001376219.1,NR_164782.1,NM_001376222.1,NM_001277.3,NM_212469.2,XR_949773.2,XR_428905.3,NM_001376221.1,NM_001376220.1,XR_949772.2,XM_017017148.2	GRCh38.p13	chr11:68070213-68070262
34325	ATP5MF_01	ATP5MF	ATP5MF	NM_001003714.3,NM_001003713.3,NM_001039178.3,NM_004889.5	GRCh38.p13	chr7:99458321-99458355
43858	CGRRF1_01	CGRRF1	CGRRF1	XM_017020931.1,NM_006568.3,XM_011536362.2,XM_017020932.1	GRCh38.p13	chr14:54538176-54538222
50229	KLHL34_01	KLHL34	KLHL34	NM_153270.3	GRCh38.p13	chrX:21655775-21655824
39119	HSDL1_01	HSDL1	HSDL1	NM_031463.5,NM_001146051.1,XM_005256189.3	GRCh38.p13	chr16:84124628-84124677
45562	NOP53_01	NOP53	NOP53	NM_015710.5	GRCh38.p13	chr19:47756737-47757040
49177	ASB16_01	ASB16	ASB16	NM_080863.5	GRCh38.p13	chr17:44178974-44179012
34725	ING3_01	ING3	ING3	XR_001744819.1,NM_198267.2,XM_017012369.2,NM_019071.3	GRCh38.p13	chr7:120955578-120955613
40376	TUBGCP4_01	TUBGCP4	TUBGCP4	XM_011521455.2,NM_014444.5,XM_011521454.3,XR_243092.4,XM_017022078.2,NM_001286414.3,XR_001751226.2	GRCh38.p13	chr15:43400205-43401748
45748	PDGFC_01	PDGFC	PDGFC	NM_016205.3,XM_011532124.2,NR_036641.2,XM_017008456.2,XM_017008455.1	GRCh38.p13	chr4:156761973-156762022
37574	THEMIS2_01	THEMIS2	THEMIS2	NM_001286113.1,XM_006711050.1,XM_011542445.2,NM_001286115.1,NM_001105556.3,NM_004848.3,XM_005246041.3,NM_001039477.2	GRCh38.p13	chr1:27886092-27886141
43904	SEPTIN9_01	SEPTIN9	SEPTIN9	NM_001113492.1,NM_001293696.2,NM_001113494.1,NM_001113496.2,NM_001293695.2,NM_001113491.2,NM_001113495.2,NM_001293697.2,NM_001293698.2,NM_001113493.2,NM_006640.4	GRCh38.p13	chr17:77499859-77499899
47132	DEAF1_01	DEAF1	DEAF1	XM_024448327.1,NM_021008.4,XM_024448326.1,NM_001367390.1,XM_024448325.1,XM_011519842.3,NM_001293634.1	GRCh38.p13	chr11:688432-691506
43875	POLD3_01	POLD3	POLD3	NR_046409.2,XM_011544734.3,NM_006591.3,XM_005273716.1,NM_001363597.2,NR_046410.2	GRCh38.p13	chr11:74618558-74618607
49298	DTX3L_01	DTX3L	DTX3L	NM_138287.3	GRCh38.p13	chr3:122570637-122571691
47984	LRRTM4_01	LRRTM4	LRRTM4	NM_001282924.2,NM_001330370.1,NM_001134745.2,NM_024993.6,NM_001282928.3,NR_146416.1	GRCh38.p13	chr2:77522129-77522178
35438	GEN1_01	GEN1	GEN1	XM_011532820.2,XM_005262613.4,XM_006712005.3,XM_011532821.2,NM_001130009.3,XM_011532822.2,NM_182625.5	GRCh38.p13	chr2:17764980-17765014
49991	FAM187B_01	FAM187B	FAM187B	NM_152481.1	GRCh38.p13	chr19:35225205-35227995
50808	DTX3_01	DTX3	DTX3	NM_001286246.2,NM_178502.4,XM_005268703.1,NM_001286245.2,XM_011538022.2,XM_005268698.1,XM_005268697.1,XM_005268700.1,XM_024448876.1	GRCh38.p13	chr12:57609392-57609441
13546	TSPAN1_01	TSPAN1	TSPAN1	XM_011540460.3,NM_005727.4	GRCh38.p13	chr1:46184844-46184878
46221	MARCHF1_01	MARCHF1	MARCHF1	XM_017008336.1,NM_017923.4,NM_001166373.1,XM_011532055.3,XM_017008334.1,XM_017008335.1	GRCh38.p13	chr4:163528451-163528500
47710	FBXL15_01	FBXL15	FBXL15	XM_005270150.5,NM_024326.3	GRCh38.p13	chr10:102420588-102420637
42273	RHOB_01	RHOB	RHOB	NM_004040.4	GRCh38.p13	chr2:20447994-20448028
48774	GALP_01	GALP	GALP	NM_001145546.1,NM_033106.4	GRCh38.p13	chr19:56183200-56185239
37836	ZNF586_01	ZNF586	ZNF586	NM_017652.4,NM_001204814.1,NM_001077426.2	GRCh38.p13	chr19:57779010-57779059
38796	SGMS2_01	SGMS2	SGMS2	NM_152621.6,NM_001375907.1,NM_001375908.1,XM_011531701.2,NM_001375906.1,NM_001375910.1,NM_001375911.1,NM_001136257.2,NM_001375905.1,NM_001136258.2,XM_011531699.2	GRCh38.p13	chr4:107911031-107911080
50215	NPHP3_01	NPHP3	NPHP3	NM_153240.5	GRCh38.p13	chr3:132699362-132699411
38807	CFAP97D1_01	CFAP97D1	CFAP97D1	NM_001353400.2,NM_001136483.3	GRCh38.p13	chr17:43780543-43781124
48297	LONP2_01	LONP2	LONP2	XM_017023755.2,NM_001300948.3,XM_017023756.1,NM_001348078.2,NM_031490.5	GRCh38.p13	chr16:48270031-48270080
50684	NLRP13_01	NLRP13	NLRP13	NM_001321057.1,NM_176810.2	GRCh38.p13	chr19:55910655-55910704
45518	WIPI2_01	WIPI2	WIPI2	NM_001033520.1,NM_015610.4,NM_001278299.2,XM_017011952.1,NM_016003.4,NM_001033519.2,NM_001033518.2,XM_006715685.1	GRCh38.p13	chr7:5217948-5217993
36781	ITGB4_01	ITGB4	ITGB4	XM_005257311.4,XM_005257309.2,NM_001005619.1,NM_001005731.3,NM_001321123.2,XM_011524752.2,XM_006721870.3,XM_006721866.3,XM_006721867.3,XM_006721868.3,XM_011524751.2,NM_000213.5	GRCh38.p13	chr17:75752484-75752533
51815	INAFM2_01	INAFM2	INAFM2	XM_011521149.3,NM_001301268.2	GRCh38.p13	chr15:40326574-40326623
41049	FNTA_01	FNTA	FNTA	NR_033698.1,NM_002027.3	GRCh38.p13	chr8:43085400-43085449
49767	TBC1D31_01	TBC1D31	TBC1D31	XM_017013984.1,XM_011517379.2,NM_001363150.1,NM_001363155.1,XM_005251104.1,NM_001363154.1,NM_001363149.1,NM_001363153.1,XR_001745623.1,NM_001363152.1,XR_928364.1,NM_001330606.2,NM_001363156.1,NM_145647.4,XR_002956653.1,XR_928365.2,XR_001745625.1,XR_001745622.1,NM_001363151.2,NM_001145088.2,NM_001363148.1	GRCh38.p13	chr8:123097340-123097389
50478	CCDC83_01	CCDC83	CCDC83	XM_011544839.2,XM_011544841.1,XM_011544844.2,XM_017017354.1,NM_001286159.2,XM_011544840.2,XM_017017355.1,NM_173556.5,XM_011544843.1,XM_011544842.1	GRCh38.p13	chr11:85882536-85882580
42425	EEF1E1_01	EEF1E1	EEF1E1,EEF1E1-BLOC1S5	NM_004280.5,NR_037618.1,NM_001135650.2	GRCh38.p13	chr6:8097432-8102448
47850	ZFAND1_01	ZFAND1	ZFAND1	NR_033194.1,NR_033193.1,NR_033196.1,NM_001170796.1,NR_033195.1,NM_024699.3,NM_001170797.1	GRCh38.p13	chr8:81714865-81715005
34694	CLCN4_01	CLCN4	CLCN4	NM_001830.4,NM_001256944.1	GRCh38.p13	chrX:10213822-10213859
41284	MAZ_01	MAZ	MAZ	NM_001276275.2,NR_074080.2,XR_002957806.1,NM_002383.4,NM_001042539.3,NM_001276276.2,XM_006721047.4,XR_002957805.1	GRCh38.p13	chr16:29811100-29811149
45073	MRPL19_01	MRPL19	MRPL19	NM_014763.4	GRCh38.p13	chr2:75652572-75652619
49400	TRIOBP_01	TRIOBP	TRIOBP	NM_001039141.3,NM_007032.5,NM_138632.2	GRCh38.p13	chr22:37755141-37755180
34653	DENND11_01	DENND11	DENND11	XR_001744838.1,XM_024446843.1,NM_001080392.2	GRCh38.p13	chr7:141664984-141665022
46546	USP49_01	USP49	USP49	NM_001286554.2,NM_001384542.1,NM_018561.5	GRCh38.p13	chr6:41798847-41798896
37768	SLC6A3_01	SLC6A3	SLC6A3	NM_001044.5	GRCh38.p13	chr5:1406263-1409046
44935	PRPF19_01	PRPF19	PRPF19	NM_014502.5	GRCh38.p13	chr11:60897922-60898120
43533	IKZF1_01	IKZF1	IKZF1	XM_011515070.2,NM_001220768.2,XM_011515071.2,XM_011515061.3,NM_001291840.1,XM_017011668.1,NM_001291838.2,XM_017011669.1,XM_017011667.1,NM_001291839.2,NM_001220771.2,XM_011515058.2,NM_001220767.2,NM_001291842.1,NM_001291845.2,NM_001291847.2,NM_001291843.1,NM_001291846.2,NM_006060.6,NM_001291841.1,XM_011515078.2,NM_001291844.1,XM_011515077.2,XM_017011670.1,XM_011515074.2,XM_011515076.2,XM_011515075…	GRCh38.p13	chr7:50327668-50327704
13224	SHLD3_01	SHLD3	SHLD3	NM_001365341.2	GRCh38.p13	chr5:65629900-65629934
38048	GRIA2_01	GRIA2	GRIA2	NM_001083620.3,NM_000826.6,NM_001379000.3,NM_001379001.3,XR_001741212.2,NM_001083619.3	GRCh38.p13	chr4:157332882-157332931
39752	NADK_01	NADK	NADK	XM_017002146.1,NM_001198994.2,XM_017002143.2,XM_011542008.1,XR_001737371.2,NM_001353641.2,XM_017002145.2,NM_023018.5,XM_011542009.2,XM_017002144.2,NM_001198993.2,NM_001353642.2,XM_011542007.2,XR_946747.2,XM_011542006.1,XM_006710839.2,NM_001198995.1	GRCh38.p13	chr1:1752790-1752834
50550	C3orf38_01	C3orf38	C3orf38	NM_173824.4,XM_005264745.5	GRCh38.p13	chr3:88156345-88156394
39829	ARSF_01	ARSF	ARSF	XM_011545523.1,XM_011545522.1,NM_004042.4,NM_001201538.1,NM_001201539.2,XM_017029527.1,XM_017029528.1	GRCh38.p13	chrX:3101134-3101183
35675	CPT2_01	CPT2	CPT2	NM_000098.3,NM_001330589.2	GRCh38.p13	chr1:53210335-53210384
45873	CCDC174_01	CCDC174	CCDC174	NM_016474.5,NR_135523.1,XM_017006554.2	GRCh38.p13	chr3:14671264-14671313
12537	MIEN1_01	MIEN1	MIEN1	NM_001330206.1,NM_032339.5	GRCh38.p13	chr17:39729710-39729744
45112	OSBPL2_01	OSBPL2	OSBPL2	NM_001278649.2,NM_144498.4,NM_001363878.1,NM_014835.4	GRCh38.p13	chr20:62281108-62281157
44813	VSIG2_01	VSIG2	VSIG2	NM_001329920.2,NM_014312.5	GRCh38.p13	chr11:124748429-124748469
51823	KLHL14_01	KLHL14	KLHL14	NM_020805.3,XM_011526109.2	GRCh38.p13	chr18:32769809-32769844
37503	NRCAM_01	NRCAM	NRCAM	NM_001371145.1,XM_024446777.1,NM_001371122.1,NM_001371152.1,NM_001371136.1,XM_006716012.2,NM_001371182.1,NM_001371143.1,XM_024446775.1,NM_001371124.1,NM_001371134.1,NM_001371176.1,NM_001371159.1,NM_001037132.4,NM_001371180.1,XM_024446773.1,XM_017012246.2,NM_001193582.1,NM_001371174.1,NM_001371154.1,XM_006716007.2,XM_017012251.2,NM_001371178.1,NM_001371157.1,NM_001371141.1,NM_001371126.1,NM_001193…	GRCh38.p13	chr7:108149241-108149290
43014	ARID3A_01	ARID3A	ARID3A	XM_024451407.1,XM_017026446.1,XM_005259514.4,XM_017026445.1,XM_005259513.5,NM_005224.3	GRCh38.p13	chr19:972265-972314
40971	CTRL_01	CTRL	CTRL	NM_001907.3	GRCh38.p13	chr16:67930453-67930487
50426	PAPLN_01	PAPLN	PAPLN	NM_001365906.3,NR_158677.2,XM_011537296.2,NM_001365907.2,XM_011537292.3,NR_158678.2,XM_011537293.3,XR_429333.3,XM_011537294.3,NM_173462.4,XM_011537295.3,XM_017021749.2,XM_011537291.3	GRCh38.p13	chr14:73246174-73250021
40989	DLST_01	DLST	DLST,DLSTP1	NR_045209.2,NR_130749.1,NM_001933.5,NR_033814.2	GRCh38.p13	chr1:75742430-75742479,chr14:74903286-74903335
46598	RC3H2_01	RC3H2	RC3H2	NM_018835.4,NM_001354486.2,NM_001354482.2,NM_001100588.3,NM_001354478.2,NM_001354479.2	GRCh38.p13	chr9:122892969-122893018
36074	ADORA3_01	ADORA3	ADORA3	NM_001302678.2,NM_000677.4,NM_001302679.2	GRCh38.p13	chr1:111499849-111499898
43079	GZMM_01	GZMM	GZMM	NM_005317.4,NM_001258351.2	GRCh38.p13	chr19:549692-549726
12379	KLF14_01	KLF14	KLF14	NM_138693.4	GRCh38.p13	chr7:130731102-130731141
49306	TAAR1_01	TAAR1	TAAR1	NM_138327.4	GRCh38.p13	chr6:132645444-132645493
46931	GJD2_01	GJD2	GJD2	XM_017022438.1,NM_020660.3	GRCh38.p13	chr15:34752661-34752710
41339	MYH3_01	MYH3	MYH3	XM_011523871.2,XM_011523870.3,NM_002470.4	GRCh38.p13	chr17:10640582-10640631
51113	SASS6_01	SASS6	SASS6	NM_194292.3,NM_001304829.2,XM_017000486.1	GRCh38.p13	chr1:100102975-100103024
47243	RBM25_01	RBM25	RBM25	XM_011537044.3,XM_024449680.1,XR_943501.3,NM_021239.3	GRCh38.p13	chr14:73111045-73111094
51068	TSGA10_01	TSGA10	TSGA10	XM_017005038.1,XM_024453161.1,XM_017005036.2,XM_024453160.1,XM_011511935.3,XM_006712781.2,NM_001349012.1,NM_001349013.2,XM_017005035.1,NM_182911.4,XM_017005044.1,XM_017005039.1,XM_011511941.1,XM_017005037.1,XM_017005043.2,XM_017005042.1,XM_024453158.1,XM_024453159.1,XM_005264027.1,XM_017005041.2,XM_005264029.1,XM_017005040.2,XM_005264026.1,XM_005264025.2,XM_005264024.2,NM_025244.4,XM_017005048.1,…	GRCh38.p13	chr2:99105609-99105658
46073	MBTD1_01	MBTD1	MBTD1	XR_001752545.1,NM_017643.3,XM_011524933.2,XM_005257467.5,XM_011524936.1,XM_011524924.2,XM_011524922.2,XM_005257468.5,XM_011524931.2,XM_011524928.2,XM_011524923.2,XM_011524929.2,XR_934491.2,XR_001752546.1,XM_011524935.3,XM_011524926.3,XM_011524930.1,XR_934492.2,XM_011524925.1,XM_011524934.2,XM_017024782.1	GRCh38.p13	chr17:51202873-51202922
36721	OR6F1_01	OR6F1	OR6F1	NM_001005286.2
40149	PPP1R1C_01	PPP1R1C	PPP1R1C	NM_001261424.2,XM_017003451.1,NM_001261425.2,NR_048566.2,NM_001080545.2,NR_048567.1	GRCh38.p13	chr2:182063780-182117236
39208	ZBP1_01	ZBP1	ZBP1	NM_001160417.2,NM_001160418.2,NR_136660.2,NM_001160419.3,XR_001754410.1,XR_001754415.1,XR_001754408.1,XR_001754414.1,XR_001754409.1,XR_936634.1,NM_001323966.2,XM_017028086.1,XM_011529057.2,NM_030776.3,XR_001754412.1,XR_001754413.1,XM_011529058.2	GRCh38.p13	chr20:57614905-57614939
49720	FANK1_01	FANK1	FANK1	XM_017016920.2,XM_017016921.2,XM_017016922.2,XM_017016919.1,XM_017016918.1,XM_017016923.2,XR_945878.3,NM_145235.5,XM_005270280.4,NM_001363549.1,XM_006718058.4,XM_011540358.3,XM_011540348.2,XM_017016917.2,XM_024448257.1,XM_024448258.1,XM_024448256.1,XM_017016924.1,XM_024448254.1,XM_024448251.1,XM_006718064.3,XM_011540349.3,XM_011540360.3,XM_011540361.2,XM_024448253.1,XM_011540351.2,NM_001350939.1,…	GRCh38.p13	chr10:125995442-125995491
50051	SDE2_01	SDE2	SDE2	NM_152608.4	GRCh38.p13	chr1:225995267-225995316
40418	SERPINB11_01	SERPINB11	SERPINB11	NM_001370475.1,NM_001291279.2,NM_001291278.2,NM_080475.4	GRCh38.p13	chr18:63723029-63723075
48479	TMEM175_01	TMEM175	TMEM175	XM_005272304.1,XM_024454255.1,XM_017008705.1,NM_001297428.2,NM_001297427.2,XM_017008701.1,NM_001297426.1,NM_001297423.2,XM_005272307.5,XM_017008704.2,NM_032326.4,NM_001297425.2,XM_024454252.1,XM_024454253.1,XM_017008703.1,XM_005272303.4,NM_001297424.2,XM_005272301.2,XM_024454254.1	GRCh38.p13	chr4:950479-951212
47692	PHF1_01	PHF1	PHF1	NM_002636.5,NM_024165.3,XR_926250.1,XM_011514664.1,XM_011514665.1,XR_926249.2,XM_011514669.1,XM_017010939.1,XM_011514662.1,XM_011514670.2,XM_011514663.1,XM_011514666.1,NR_027692.2	GRCh38.p13	chr6:33414510-33414739
49941	UGT3A1_01	UGT3A1	UGT3A1	XM_011513959.2,NM_152404.4,XR_001741997.1,XM_011513958.2,XM_011513957.2,XR_001741998.1,NM_001171873.2,XM_005248243.4	GRCh38.p13	chr5:35968019-35968068
43977	BRAP_01	BRAP	BRAP	XM_017019994.1,XM_017019995.1,XM_005253944.4,XM_017019992.1,NM_006768.5,XM_017019993.1,XM_011538789.3	GRCh38.p13	chr12:111672688-111672737
47460	HERPUD2_01	HERPUD2	HERPUD2	XR_926944.2,XM_017012506.2,XR_001744846.2,NM_022373.5	GRCh38.p13	chr7:35667583-35670258
13473	TMEM158_01	TMEM158	TMEM158	NM_015444.3	GRCh38.p13	chr3:45225905-45225939
43471	MT3_01	MT3	MT3	NM_005954.4	GRCh38.p13	chr16:56589530-56589569
46570	THSD1_01	THSD1	THSD1	NM_199263.3,NM_018676.4	GRCh38.p13	chr13:52397712-52397761
45906	GNG13_01	GNG13	GNG13	NM_016541.3	GRCh38.p13	chr16:798806-798998
48989	PANX3_01	PANX3	PANX3	NM_052959.3	GRCh38.p13	chr11:124619307-124619356
38148	CEP78_01	CEP78	CEP78	XM_005252266.4,NM_001098802.3,NM_001330694.2,NM_001349838.2,NM_001349839.2,NM_001330691.3,NM_032171.3,NM_001349840.2,NM_001330693.3,XM_017015196.1	GRCh38.p13	chr9:78251936-78251985
48014	NYNRIN_01	NYNRIN	NYNRIN	XM_011537016.2,NM_025081.3	GRCh38.p13	chr14:24418879-24418921
35067	STS_01	STS	STS	NM_000351.7,NM_001320754.2,NM_001320751.2,NM_001320752.2,NM_001320753.2,NM_001320750.3	GRCh38.p13	chrX:7334070-7334104
36577	OR2AG1_01	OR2AG1	OR2AG1	NM_001004489.2	GRCh38.p13	chr11:6785673-6785722
38141	RASGRP2_01	RASGRP2	RASGRP2	XM_011544723.3,NM_001318398.2,XM_017017086.1,XM_017017082.2,XM_017017083.2,NM_153819.1,XM_011544720.2,XM_011544721.1,XM_011544718.2,XM_011544725.2,NM_001098671.2,NM_001098670.2,XM_011544722.2,XM_017017084.2,XM_017017085.2	GRCh38.p13	chr11:64727077-64727126
11555	CCDC6_01	CCDC6	CCDC6	NM_005436.5	GRCh38.p13	chr10:59804434-59804471
40854	CEACAM1_01	CEACAM1	CEACAM1,CEACAM3,CEACAM6	NM_001184815.2,NM_001277163.3,XM_011526990.2,NM_001712.5,NM_001815.5,NM_001184813.2,NM_001205344.2,NM_001024912.3,NM_001184816.2,XM_011527206.2,NM_002483.7,NR_102333.3	GRCh38.p13	chr19:42527042-42527091,chr19:41797898-41797947,chr19:41756909-41756958
37141	VSIG8_01	VSIG8	VSIG8	NM_001013661.1	GRCh38.p13	chr1:159856533-159856572
42195	HDAC3_01	HDAC3	HDAC3	NM_003883.4,NR_149164.1,NR_149168.1,NM_001355040.1,NM_001355041.1,NM_001355039.2,NR_149169.1,NR_149165.1,NR_149167.2,NR_149166.1	GRCh38.p13	chr5:141629897-141630070
50826	TFAP2E_01	TFAP2E	TFAP2E	NM_178548.4,XM_017001139.2	GRCh38.p13	chr1:35595046-35595085
47603	ZSWIM4_01	ZSWIM4	ZSWIM4	XM_017027156.1,XM_017027153.1,NM_001367834.2,XM_017027155.1,XM_017027154.1,NM_023072.3,XM_024451657.1	GRCh38.p13	chr19:13831895-13831944
41993	ANXA9_01	ANXA9	ANXA9	NM_003568.3,XM_011510058.3	GRCh38.p13	chr1:150986360-150986394
44492	CDK14_01	CDK14	CDK14	NM_012395.3,NM_001287136.1,NM_001287137.1,NM_001287135.2	GRCh38.p13	chr7:91209282-91209331
44945	MYBBP1A_01	MYBBP1A	MYBBP1A	XR_002957950.1,NM_001105538.1,XM_011523616.2,XM_024450536.1,NM_014520.4	GRCh38.p13	chr17:4543123-4544495
35998	SFTPB_01	SFTPB	SFTPB	NM_001367281.1,NM_000542.5,XM_005264488.4,XM_005264490.4,XM_005264487.2,NM_198843.3	GRCh38.p13	chr2:85667132-85667680
11515	CA9_01	CA9	CA9	NM_001216.3,XR_001746374.2,XR_428428.3	GRCh38.p13	chr9:35679227-35679262
49880	POGLUT1_01	POGLUT1	POGLUT1	XR_001740211.2,XM_006713705.3,NR_024265.2,XM_017006879.1,XM_017006878.2,XR_001740212.2,NM_152305.3,XM_024453643.1	GRCh38.p13	chr3:119493846-119493895
49497	PPM1L_01	PPM1L	PPM1L	NM_001317911.2,NM_001317912.2,NR_134243.1,NM_139245.4	GRCh38.p13	chr3:161068958-161069007
44759	IMPA2_01	IMPA2	IMPA2	XM_011525661.3,NM_014214.3,XM_011525659.3	GRCh38.p13	chr18:12030558-12030592
43339	CELA3A_01	CELA3A	CELA3A	NM_005747.5	GRCh38.p13	chr1:22009800-22009849
13538	TRMT61A_01	TRMT61A	TRMT61A	NM_152307.3	GRCh38.p13	chr14:103530097-103530131
42934	MSC_01	MSC	MSC	NM_005098.4
50525	DTWD2_01	DTWD2	DTWD2	NM_173666.4,XM_011543340.2,NM_001308081.1,XM_011543338.3	GRCh38.p13	chr5:118848154-118848203
49838	TNFRSF18_01	TNFRSF18	TNFRSF18	NM_148902.2,XM_017002722.2,NM_148901.2,NM_004195.3	GRCh38.p13	chr1:1205466-1206395
50570	CLBA1_01	CLBA1	CLBA1	NM_001364170.1,XM_005267318.4,NM_174891.4	GRCh38.p13	chr14:104986841-104988978
50912	KRTAP15-1_01	KRTAP15-1	KRTAP15-1	NM_181623.2	GRCh38.p13	chr21:30440710-30440759
34349	S100A8_01	S100A8	S100A8	NM_001319197.1,NM_001319201.1,NM_001319198.1,NM_001319196.1,NM_002964.5	GRCh38.p13	chr1:153390475-153390514
39048	KDM8_01	KDM8	KDM8	NM_024773.3,NM_001145348.1,XR_001751987.1,XM_017023676.1,XM_017023677.2,XM_017023678.2,XM_017023679.2,XM_017023680.1	GRCh38.p13	chr16:27220743-27220792
11774	DBNDD1_01	DBNDD1	DBNDD1	NM_001288709.2,NM_001371581.1,NM_001042610.3,NM_001288708.2,NM_024043.3	GRCh38.p13	chr16:90006350-90006384
44971	EHD3_01	EHD3	EHD3	XM_011532806.2,NM_014600.3	GRCh38.p13	chr2:31266865-31266914
43910	CPLX1_01	CPLX1	CPLX1	XM_011513391.1,NM_006651.4	GRCh38.p13	chr4:785314-785363
44566	DDX25_01	DDX25	DDX25	XM_011542790.3,NM_001330438.2,XM_011542791.3,NM_013264.5	GRCh38.p13	chr11:125917188-125917237
51633	TINCR_01	TINCR	TINCR	NR_027064.3	GRCh38.p13	chr19:5559020-5559069
37502	EXOC4_01	EXOC4	EXOC4	NM_021807.4,XR_001744845.2,NM_001037126.1,XM_005250523.5	GRCh38.p13	chr7:133305981-133306030
51756	MYL7_01	MYL7	MYL7	XM_011515463.2,XM_005249817.4,XM_017012478.1,XM_017012479.1,XM_011515465.2,XM_011515464.2,XM_024446851.1,NM_021223.3	GRCh38.p13	chr7:44139807-44139847
45800	HSPA14_01	HSPA14	LOC100421372,HSPA14	NR_103464.2,NM_001278205.1,NM_016299.4,NM_001378790.1,NM_001378785.1	GRCh38.p13	chr10:14839939-14840077
46829	ANKRD2_01	ANKRD2	ANKRD2	NM_001291219.3,NM_001346793.2,NM_001129981.3,NM_020349.4,NM_001291218.1	GRCh38.p13	chr10:97578557-97578592
45739	MRTO4_01	MRTO4	MRTO4	XM_006710675.4,NM_016183.4	GRCh38.p13	chr1:19254807-19255963
47204	CCDC181_01	CCDC181	CCDC181	XM_005245383.1,XM_017001940.1,NM_021179.2,XM_011509827.2,XM_017001939.1,NM_001300969.1,XM_017001938.1,NM_001300968.1	GRCh38.p13	chr1:169421424-169421473
34493	SQOR_01	SQOR	SQOR	NM_021199.4,NM_001271213.1	GRCh38.p13	chr15:45662035-45662076
42724	AIMP1_01	AIMP1	AIMP1	XM_017008836.2,NM_004757.3,NM_001142415.1,XM_017008835.2,NM_001142416.2	GRCh38.p13	chr4:106331743-106331792
36938	CADPS2_01	CADPS2	CADPS2	NM_001363400.1,XM_024446998.1,NM_001363391.1,NM_001363390.1,NM_001363389.1,NM_001167940.1,NM_001363393.1,NM_001363392.1,NM_001363397.1,NM_001363396.1,XM_005250706.5,NM_001363395.1,NM_001363394.1,NM_001363399.1,NM_001363398.1,XM_005250701.5,XM_017012796.2,XM_005250699.5,XM_005250702.5,NM_017954.11,XM_017012794.2,NM_001009571.3,XM_005250697.5,XM_005250696.5,XM_017012798.2,XM_005250704.5,XM_00525070…	GRCh38.p13	chr7:122407601-122407650
42289	CDR1_01	CDR1	CDR1	NM_004065.2	GRCh38.p13	chrX:140784129-140784178
42147	ADAM7_01	ADAM7	ADAM7	NM_003817.4,XM_017013943.1	GRCh38.p13	chr8:24490870-24491933
43219	KLK2_01	KLK2	KLK2	NR_045762.2,NM_001002231.3,NR_045763.2,NM_005551.5,NM_001256080.1	GRCh38.p13	chr19:50876888-50876937
11690	COL4A2_01	COL4A2	COL4A2	NM_001846.4	GRCh38.p13	chr13:110458787-110458821
36181	GLRB_01	GLRB	GLRB	XM_017008035.2,NM_001166060.1,XM_017008034.1,NM_001166061.1,XR_002959723.1,XR_001741207.2,NM_000824.5	GRCh38.p13	chr4:157120637-157122353
35815	PEX7_01	PEX7	PEX7	XM_017010934.2,XM_006715502.2,NM_000288.4,XM_005267019.4	GRCh38.p13	chr6:136826339-136826388
51928	CIITA_01	CIITA	CIITA	XM_024450280.1,XM_011522484.3,XM_011522486.2,NM_000246.4,XM_011522487.2,NM_001286403.2,NM_001286402.1,XM_011522491.2,NM_001379330.1,NM_001379331.1,XR_001751904.1,XM_011522489.2,NM_001379332.1,XM_011522490.2,XR_932842.2,XM_011522494.2,NR_104444.2,XR_932841.3,NM_001379333.1,XM_006720880.3,XR_932846.3,XR_932847.3,NM_001379334.1,XM_024450281.1,XM_011522485.2	GRCh38.p13	chr16:10895670-10895704
36272	PPIC_01	PPIC	PPIC	NM_000943.5	GRCh38.p13	chr5:123023979-123025808
50443	TMEM171_01	TMEM171	TMEM171	NM_173490.8,XM_011543156.1,NM_001161342.3	GRCh38.p13	chr5:73123672-73123711
51114	IDO2_01	IDO2	IDO2	NM_194294.2	GRCh38.p13	chr8:40015673-40015722
47616	TAS2R7_01	TAS2R7	TAS2R7	NM_023919.2	GRCh38.p13	chr12:10802128-10802177
48098	STARD5_01	STARD5	STARD5	NR_135013.2,NM_181900.3	GRCh38.p13	chr15:81312808-81312856
40878	CAMLG_01	CAMLG	CAMLG	NM_001745.4	GRCh38.p13	chr5:134741129-134741178
39828	PIGO_01	PIGO	PIGO	XM_017015224.1,NM_152850.3,NM_032634.4,NM_001201484.1,XR_001746391.2,XR_001746390.1,XM_017015222.2,XM_017015223.1,XM_005251619.3,XR_242515.3	GRCh38.p13	chr9:35094291-35094340
44449	SLC39A6_01	SLC39A6	SLC39A6	NM_012319.4,XM_011525901.2,NM_001099406.1,XM_011525900.2	GRCh38.p13	chr18:36114429-36116677
50805	MB21D2_01	MB21D2	MB21D2	NM_178496.4	GRCh38.p13	chr3:192799263-192799312
45509	ERC2_01	ERC2	ERC2	NM_015576.3,XM_017006154.1,XM_017006155.1,XM_017006152.1,XM_024453447.1,XM_017006156.1,XM_017006158.1,XM_017006157.1,XM_017006159.1,NR_132749.2,XM_017006140.1,XM_017006138.1,XM_017006139.1,XM_017006143.1,XM_017006142.1,XM_017006147.1,XM_017006146.1,XM_017006141.1,XM_017006151.1,XM_017006145.1,XM_017006144.1,XM_017006149.1,XM_017006148.1,XM_017006153.1,XM_024453448.1,XM_017006150.1	GRCh38.p13	chr3:55508499-55508548
44349	INTS6_01	INTS6	INTS6	NM_001306091.2,XM_017020540.2,NM_001039938.2,XM_011535041.2,NM_012141.3,NM_001039937.2,XM_011535040.3	GRCh38.p13	chr13:51451125-51451174
42486	CPT1B_01	CPT1B	CHKB-CPT1B,CPT1B	NM_001145137.2,NM_152245.3,NR_027928.2,NM_001145135.2,NM_001145134.2,NM_152246.3,NM_004377.4	GRCh38.p13	chr22:50571460-50571509
35528	ZBTB8OS_01	ZBTB8OS	ZBTB8OS	NM_001366257.1,NM_001366256.1,XM_011541328.2,NR_158778.1,NM_001366271.1,NM_001366259.1,NM_001308138.2,NM_001366258.1,NM_001366268.1,NM_001366267.1,NM_001308139.2,NM_001366269.1,NM_001366266.1,NM_001366265.1,NM_001308141.2,NM_178547.4,NR_158781.1,NM_001308140.2,NR_158780.1,NR_158777.1,NM_001308137.2,NM_001366263.1,NR_158779.1,NR_158782.1,NR_158776.1,NM_001366264.1,NM_001366278.1,NR_158775.1,NM_001…	GRCh38.p13	chr1:32621895-32621944,chr1:32621895-32627510
47490	ATG3_01	ATG3	ATG3	NM_001278712.2,XM_011513074.1,NM_022488.5	GRCh38.p13	chr3:112537868-112538166
42003	DUSP11_01	DUSP11	DUSP11	NM_003584.2	GRCh38.p13	chr2:73762587-73762636
38693	EVA1A_01	EVA1A	EVA1A	NM_001369525.1,NM_001135032.2,NM_001369524.1,NM_032181.3	GRCh38.p13	chr2:75493563-75518058
47542	CEP85_01	CEP85	CEP85	NM_022778.5,NM_001319944.2,XM_024449200.1,NM_001281518.3,XM_024449198.1,NM_001281517.3	GRCh38.p13	chr1:26278339-26278388
41556	PTMS_01	PTMS	PTMS	NM_002824.6,NM_001330333.2	GRCh38.p13	chr12:6770617-6770659
50418	NFAT5_01	NFAT5	NFAT5	XM_017022871.2,XM_017022870.2,XM_011522820.3,NM_006599.4,NM_001113178.3,NM_138713.4,NM_173215.3,NM_001367709.1,XM_011522818.3,XM_011522819.3,XM_017022872.2,NM_138714.4,NM_173214.3,XM_011522817.3,XM_006721125.4,XM_011522822.3	GRCh38.p13	chr16:69691950-69691999
12183	H3-4_01	H3-4	H3-4	NM_003493.3	GRCh38.p13	chr1:228425278-228425312
37225	OS9_01	OS9	OS9	NM_001261421.1,NM_001017957.2,NM_001017958.2,NM_006812.4,NM_001017956.2,XM_005268581.2,NM_001261422.1,NM_001261423.1,XM_006719201.2,XM_006719200.2,NM_001261420.1	GRCh38.p13	chr12:57717898-57717947
44495	PIP5K1C_01	PIP5K1C	PIP5K1C	XM_011527845.1,XM_011527850.2,XM_011527853.2,XM_017026540.2,XM_011527846.1,NM_012398.3,NM_001300849.2,XM_011527851.2,NM_001195733.2,XM_011527848.1,XM_011527849.1	GRCh38.p13	chr19:3643325-3643362
43489	SPRR1A_01	SPRR1A	SPRR1A	NM_001199828.2,NM_005987.4	GRCh38.p13	chr1:152985692-152985741
49193	ASB15_01	ASB15	ASB15	XM_024446667.1,XM_011515818.2,XM_011515819.2,XM_005250146.4,XM_011515820.2,XM_017011757.1,XM_011515821.2,XM_017011758.1,XM_011515816.2,XM_017011756.2,NM_001290258.2,NM_080928.4,XM_011515817.2	GRCh38.p13	chr7:123629031-123629080
38627	CRISP1_01	CRISP1	CRISP1	XM_011514315.3,XM_017010320.2,XM_017010321.2,NM_001131.3,NM_170609.2,NM_001205220.1	GRCh38.p13	chr6:49846552-49846601
50445	PASD1_01	PASD1	PASD1	XM_011531102.2,NM_173493.3	GRCh38.p13	chrX:151623007-151623056
51731	STOX2_01	STOX2	STOX2	XM_011532129.1,NR_132761.1,XM_024454157.1,XM_011532130.1,XM_024454156.1,XM_011532131.1,XM_017008466.1,XR_938767.1,XM_017008467.1,XM_024454155.1,NM_020225.3	GRCh38.p13	chr4:184001407-184001455
51401	UBL4B_01	UBL4B	UBL4B	NM_203412.2	GRCh38.p13	chr1:110113106-110113155
51940	DNAJC17_01	DNAJC17	DNAJC17	XM_024449981.1,XM_017022401.2,NM_018163.3,XR_002957657.1,XM_017022402.1,XR_002957656.1	GRCh38.p13	chr15:40779229-40779263
12274	HSPA1A_01	HSPA1A	HSPA1A	NM_005345.6	GRCh38.p13	chr6:31817672-31817721
11652	CLC_01	CLC	CLC	NM_001828.6	GRCh38.p13	chr19:39735009-39735043
39081	ZFR2_01	ZFR2	ZFR2	NR_027149.2,NM_001145640.2	GRCh38.p13	chr19:3851844-3851893
12631	MYL6_01	MYL6	MYL6	NM_021019.5,NM_079423.4	GRCh38.p13	chr12:56159599-56159634
38442	ADSL_01	ADSL	ADSL	XM_011529977.3,NM_001363840.2,NR_134256.1,XR_001755176.2,XM_024452166.1,XM_011529980.3,NM_001123378.2,XR_002958670.1,NM_001317923.1,XR_002958671.1,XR_937825.3,NM_000026.4,XM_017028637.1,XM_017028636.1	GRCh38.p13	chr22:40354287-40358872
45144	ZNF652_01	ZNF652	ZNF652	XM_024450656.1,XR_934423.2,XM_024450653.1,NM_014897.2,NR_135579.2,XM_024450654.1,NM_001145365.3,XM_024450655.1	GRCh38.p13	chr17:49298258-49298300
40127	PGBD5_01	PGBD5	PGBD5	NM_001258311.2	GRCh38.p13	chr1:230332892-230332941
36567	OR10X1_01	OR10X1	OR10X1	NM_001004477.1	GRCh38.p13	chr1:158579392-158579438
46494	FOXJ2_01	FOXJ2	FOXJ2	NM_018416.3,XM_011520760.2,XM_017019640.1,XM_011520761.2	GRCh38.p13	chr12:8055361-8055410
50446	PTCHD1_01	PTCHD1	PTCHD1	NM_173495.3,XM_011545449.3	GRCh38.p13	chrX:23392926-23392975
45557	GPX7_01	GPX7	GPX7	NM_015696.5	GRCh38.p13	chr1:52608638-52608687
35752	IDUA_01	IDUA	IDUA	NR_110313.1,XM_011513461.2,NM_000203.5,XM_017008163.1,NM_001363576.1,XR_924947.1	GRCh38.p13	chr4:1004027-1004066
34850	HOXA3_01	HOXA3	HOXA3	NM_001384341.1,NM_001384335.1,NM_001384345.1,NM_001384343.1,NM_030661.5,NM_153631.3,XM_011515343.3,NM_001384338.1,NM_001384344.1,NM_001384339.1,NM_001384336.1,NM_001384337.1,NM_001384342.1,NM_001384346.1,NM_001384340.1	GRCh38.p13	chr7:27110603-27110637
48016	USP36_01	USP36	USP36	NM_001385174.1,NM_001385171.1,NM_001385170.1,XM_011525065.2,NM_001385177.1,XR_934510.3,NM_001385173.1,NR_169581.1,NM_001385172.1,XR_001752572.2,NR_169582.1,XR_001752574.2,XM_011525070.2,XM_017024901.1,XM_017024900.2,NM_001321291.2,XM_005257542.3,NM_001385179.1,XM_005257543.3,NM_001385178.1,NR_169583.1,XM_024450845.1,NR_169585.1,NR_169584.1,XR_001752573.2,XM_024450846.1,NM_001385169.1,NM_001385176…	GRCh38.p13	chr17:78799668-78799715
39262	MROH9_01	MROH9	MROH9	XM_011510006.2,NM_025063.4,NM_001163629.1,XM_011510005.2	GRCh38.p13	chr1:170971830-170971879
35451	TUBGCP5_01	TUBGCP5	TUBGCP5	NM_001354373.2,NM_001354376.2,XM_017021897.2,XM_017021900.1,NR_148875.2,XM_017021893.2,XM_017021901.1,XM_017021898.1,NM_001354378.1,XM_017021899.2,NM_001354375.2,XM_017021894.1,NM_001102610.1,XM_017021895.1,NM_001354374.2,NM_001354372.2,XM_011543868.2,XM_011543870.2,NM_052903.6,XM_017021896.1,NM_001354377.1	GRCh38.p13	chr15:23008709-23008745
35965	CYP21A2_01	CYP21A2	CYP21A2,CYP21A1P	NM_000500.9,NM_001368144.2,NR_040090.1,XM_024452555.1,NM_001368143.2,NM_001128590.4	GRCh38.p13	chr6:32039561-32039610,chr6:32006825-32006874
35259	TCF25_01	TCF25	TCF25	XM_017023049.1,XM_017023047.1,XM_017023048.1,XM_017023051.1,XM_011522956.2,XM_005256299.2,XM_005256298.2,XM_017023058.1,NM_014972.3,XM_017023054.2,XM_017023055.2,XM_017023056.2,XM_017023057.1,XM_017023052.1,XM_017023053.1,XM_011522959.2,XM_017023050.1,XM_005256297.2,XM_011522958.2,XM_011522960.2,XM_011522961.3,XM_011522957.2	GRCh38.p13	chr16:89906227-89906262
40054	UXS1_01	UXS1	UXS1	NM_001377506.1,XM_017005011.2,NM_025076.5,XM_011511902.2,NM_001377509.1,NR_165308.1,NM_001253875.2,NM_001377508.1,NM_001377505.1,XM_011511903.2,NM_001377504.1,NR_045607.2,NM_001253876.2,XM_024453157.1,XM_017005014.2,NM_001377507.1	GRCh38.p13	chr2:106101069-106101103
46129	NCAPG2_01	NCAPG2	NCAPG2	XM_017012378.1,NM_017760.7,NM_001281932.2,XM_011516356.3,XM_011516358.3,NM_001281933.2,XM_005249547.3,XM_017012377.1,XM_017012376.2,XM_011516357.2,NR_104054.2,XM_017012375.2,XM_011516362.1,XM_017012374.2	GRCh38.p13	chr7:158664695-158664744
12212	H4C6_01	H4C6	H4C6	NM_003540.4	GRCh38.p13	chr6:26240393-26240442
48953	XKR4_01	XKR4	XKR4	NM_052898.2	GRCh38.p13	chr8:55357698-55357732
35741	HMGCL_01	HMGCL	HMGCL	NM_001166059.1,NM_000191.3	GRCh38.p13	chr1:23817530-23817579
40756	HSPB1_01	HSPB1	HSPB1	NM_001540.5	GRCh38.p13	chr7:76302982-76303017
40249	SLC1A6_01	SLC1A6	SLC1A6	NM_005071.3,XM_017027152.2,NR_073589.1,NM_001272087.2,NM_001384669.1,NM_001384671.1,NM_001272088.2,NM_001384670.1	GRCh38.p13	chr19:14962115-14962149
39225	POC1A_01	POC1A	POC1A	XR_940403.1,XR_940402.1,NM_015426.5,NM_001161580.2,NM_001161581.2,XR_001740088.1,XM_017006104.1	GRCh38.p13	chr3:52122418-52122467
46239	MRPL20_01	MRPL20	MRPL20	NM_017971.4,NM_001318485.2	GRCh38.p13	chr1:1401971-1402020
52008	NPRL3_01	NPRL3	NPRL3	NM_001243247.1,NM_001039476.2,NM_001243248.1,NM_001077350.3,NM_001243249.1	GRCh38.p13	chr16:86799-86833
48022	MYCT1_01	MYCT1	MYCT1	XM_011536151.3,NM_001371626.1,XM_017011319.2,NM_025107.2,XM_011536152.3,NM_001371624.1,NM_001371625.1	GRCh38.p13	chr6:152721747-152721796
41389	OR3A1_01	OR3A1	OR3A1	NM_002550.3,XM_017024696.1,XM_017024695.1	GRCh38.p13	chr17:3291669-3291708
50625	TDRP_01	TDRP	TDRP	NM_001256113.2,NM_001384899.1,NM_175075.5
34947	ARFGAP1_01	ARFGAP1	ARFGAP1	XR_936574.2,NM_001281483.1,NM_001281482.2,NM_001281484.1,XM_017027950.1,NM_018209.4,XR_001754330.2,XM_006723823.3,XR_001754329.2,XR_936576.2,XM_011528901.2,XR_936575.2,NR_104023.2,NM_175609.3,NR_104022.2	GRCh38.p13	chr20:63287568-63287602
40610	DAXX_01	DAXX	DAXX	NM_001141970.2,NM_001141969.2,NM_001350.5,XM_005248860.3,NM_001254717.1	GRCh38.p13	chr6:33319510-33319559
49244	DEDD2_01	DEDD2	DEDD2	NR_073047.2,NR_073048.2,NM_001270615.2,XM_024451400.1,NR_073051.2,NR_073050.2,NM_133328.4,NR_073046.2,XM_017026403.1,XM_011526572.1,NM_001270614.2,XM_011526569.1,NR_073052.2,XM_011526571.1,XM_017026402.1,NR_073049.2	GRCh38.p13	chr19:42198752-42198801
47642	CYREN_01	CYREN	CYREN	NM_001243751.1,NM_001243754.1,XM_017012591.2,XM_017012594.2,NM_001243755.1,NM_001363329.1,NM_001243749.1,NM_001243752.1,XM_017012593.2,NM_001243753.1,NM_024033.4,XM_017012592.2,NM_001305629.1,NM_001363330.1,XM_024446930.1	GRCh38.p13	chr7:135166357-135166406
38860	DMTF1_01	DMTF1	DMTF1	XM_017012875.1,XM_024447016.1,NM_021145.3,NM_001142327.2,NM_001142326.1,XM_017012867.1,XM_017012866.2,XM_017012872.2,XM_017012873.1,XM_024447021.1,XM_024447020.1,XM_011516739.3,XM_017012869.1,XM_024447018.1,XM_017012870.2,XM_011516737.1,XM_024447017.1,XM_017012871.1,XM_024447023.1,XM_024447022.1,XM_024447011.1,XM_024447019.1,XM_017012878.2,XM_024447025.1,XM_024447024.1,XM_024447012.1,XM_017012868…	GRCh38.p13	chr7:87196086-87196135
35913	LORICRIN_01	LORICRIN	LORICRIN	NM_000427.3,XM_024447049.1	GRCh38.p13	chr1:153262036-153262085
48793	SCRT2_01	SCRT2	SCRT2	NM_033129.4	GRCh38.p13	chr20:663728-663762
35987	MC2R_01	MC2R	MC2R	XM_017025781.1,NM_001291911.1,NM_000529.2	GRCh38.p13	chr18:13885291-13885340
48364	SLC4A11_01	SLC4A11	SLC4A11	XM_017028094.1,XM_011529384.1,NR_135000.1,NM_001363745.2,XM_005260857.1,XM_005260856.5,XR_001754419.1,NM_001174089.2,XM_011529385.1,XM_017028096.1,NM_032034.4,NM_001174090.2,XM_017028093.1,XR_001754420.2,XM_011529383.3	GRCh38.p13	chr20:3227456-3227505
35233	MRPL52_01	MRPL52	MRPL52	NM_180982.3,NM_001318870.2,NM_181307.3,NM_181305.3,NM_181306.3,XM_005267325.5,NM_181304.3,NM_178336.3,XM_005267328.3	GRCh38.p13	chr14:22834240-22834274
45290	ZCCHC14_01	ZCCHC14	ZCCHC14	XM_011522964.2,XR_243401.3,XM_017023082.2,NM_015144.3,XM_005255858.3	GRCh38.p13	chr16:87417705-87417740
46974	RIMKLB_01	RIMKLB	RIMKLB	XM_024449093.1,NR_123740.2,XM_011520790.1,XM_017019684.1,XM_024449090.1,XM_024449094.1,XM_024449095.1,XM_017019686.1,NR_147945.2,NR_147947.2,XM_024449086.1,NR_147948.2,NR_147946.2,NM_001352267.1,XM_024449085.1,NR_147949.2,XM_017019687.1,NM_001297776.2,NM_001352269.1,XM_024449087.1,NM_001352268.1,NM_001352270.1,NR_147950.2,NM_001352271.1,XM_017019683.1,XM_024449091.1,XM_017019685.2,XM_024449089.1,…	GRCh38.p13	chr12:8754025-8754074
44483	OR8B8_01	OR8B8	OR8B8	NM_012378.2
48557	MAK16_01	MAK16	MAK16	NM_032509.4	GRCh38.p13	chr8:33500657-33500706
45392	MED13L_01	MED13L	MED13L	XM_011538081.2,XM_017019090.1,XM_011538080.2,XM_011538082.2,NM_015335.5	GRCh38.p13	chr12:116096705-116111429
40768	IKBKB_01	IKBKB	IKBKB	XM_005273496.4,XM_005273493.4,XM_005273490.3,XM_005273494.3,XM_005273495.2,XR_001745530.2,NM_001242778.2,NR_040009.2,NR_033819.2,XM_017013396.1,NM_001190720.3,XM_011544522.2,XM_011544519.2,NR_033818.2,XM_011544518.2,NM_001556.3,XM_011544520.2,XR_949402.3,XM_011544521.2,XM_011544517.2,XM_005273498.4,XM_005273491.5,XM_005273492.4	GRCh38.p13	chr8:42322134-42322376
49815	NUDT2_01	NUDT2	NUDT2	NM_001244390.1,NM_147172.3,XM_024447528.1,NM_147173.3,NM_001161.5	GRCh38.p13	chr9:34343197-34343246
42075	TNFSF11_01	TNFSF11	TNFSF11	XM_011535280.2,XM_017020802.1,NM_033012.3,NM_003701.4,XM_017020803.2	GRCh38.p13	chr13:42581241-42581290
34524	PHB_01	PHB	PHB	NM_002634.4,NM_001281497.1,NM_001281496.1,NM_001281715.1,XM_017024763.1	GRCh38.p13	chr17:49409415-49409449
47772	HMBOX1_01	HMBOX1	HMBOX1	XR_001745593.1,NR_136758.2,NM_001324394.2,XM_024447269.1,XR_001745590.2,XR_001745594.1,XR_001745595.1,NM_001324392.1,NM_001330498.2,NM_001324393.2,NR_136757.2,NM_001135726.3,NM_001324390.1,XM_017013823.2,NM_001324391.2,XM_017013824.2,XM_005273641.5,XM_017013825.1,NM_001324389.2,NM_001324395.2,NM_001324388.2,NM_001324387.2,NM_001324386.2,NM_001324385.2,NM_001324384.1,XM_006716398.2,NM_001324383.2,…	GRCh38.p13	chr8:28970350-28970399
37532	EEF1B2_01	EEF1B2	EEF1B2	NM_001959.4,NM_021121.3,NM_001037663.1	GRCh38.p13	chr2:206161371-206161407
34754	SLC27A5_01	SLC27A5	SLC27A5	NM_012254.3,NM_001321196.1,XM_011526364.2,XM_017026214.2	GRCh38.p13	chr19:58501303-58501337
34951	ST7_01	ST7	ST7	NM_001369602.1,NM_001369607.1,NM_001369606.1,NR_161420.1,NM_021908.3,NM_001369599.1,NM_018412.4,NM_001369598.1,NM_001369601.1,NM_001369600.1,NR_161423.1,NM_001369604.1,NR_161422.1,NR_161421.1,NR_161419.1,NR_161418.1,NM_001369603.1	GRCh38.p13	chr7:117219130-117219164
51793	APBA3_01	APBA3	APBA3	XM_006722950.4,XM_006722951.3,NM_004886.4	GRCh38.p13	chr19:3751493-3751527
49738	CCDC127_01	CCDC127	CCDC127	NM_145265.3	GRCh38.p13	chr5:205790-205835
44299	DDX42_01	DDX42	DDX42	NM_203499.3,XM_024450558.1,NM_007372.3,XM_017024111.1,XM_006721657.1,XM_011524259.2	GRCh38.p13	chr17:63813406-63815563
44089	ZNF33A_01	ZNF33A	ZNF33A	NM_001324176.2,XM_011519650.2,NM_001278175.2,NM_001278178.1,XM_011519653.2,NM_001278170.2,NM_006974.3,NM_001324175.2,XM_011519654.2,NM_006954.2,NM_001278174.2,NM_001278173.1,NM_001278176.2,NM_001278171.2,XM_011519651.2,NM_001278177.2,NM_001278179.2,XM_017016617.1,NM_001324178.2,NM_001324177.2	GRCh38.p13	chr10:38059216-38059265
46903	APMAP_01	APMAP	APMAP	NM_020531.3,XM_005260763.3	GRCh38.p13	chr20:24963241-24963290
51031	FAM131C_01	FAM131C	FAM131C	NM_182623.3	GRCh38.p13	chr1:16057865-16057901
43825	DYNLT1_01	DYNLT1	DYNLT1	NM_001291602.2,NM_006519.4,NM_001291603.2	GRCh38.p13	chr6:158636779-158636828
43087	HCLS1_01	HCLS1	HCLS1	NM_001292041.2,NM_005335.6	GRCh38.p13	chr3:121631486-121631535
42757	OTOF_01	OTOF	OTOF	NM_194323.3,NM_004802.4,NM_194248.3,NM_194322.3,NM_001287489.2	GRCh38.p13	chr2:26458167-26458216
52055	SLC5A10_01	SLC5A10	SLC5A10	NM_001270649.1,XM_011523653.3,NM_001042450.4,XM_011523652.2,NM_001282417.1,XM_017024191.2,NM_001270648.2,NM_152351.5	GRCh38.p13	chr17:18960604-18960643
37451	TAAR2_01	TAAR2	TAAR2	NM_014626.3,NM_001033080.1	GRCh38.p13	chr6:132617611-132617660
44197	TFEB_01	TFEB	TFEB	NM_001167827.3,NM_001271943.1,XM_005249411.1,XM_011514915.1,NM_001271944.2,NM_001271945.1,NM_007162.2,XM_011514916.2,XM_005249412.1,XM_006715212.4	GRCh38.p13	chr6:41684216-41684255
42422	SLC25A27_01	SLC25A27	SLC25A27	NM_001204051.2,NM_004277.5,NM_001204052.1,XM_005249483.2	GRCh38.p13	chr6:46676685-46676734
43366	TXNDC9_01	TXNDC9	TXNDC9	NM_005783.4,XM_017003147.2	GRCh38.p13	chr2:99322117-99322166
35993	RAG2_01	RAG2	RAG2	NM_001243786.1,NM_000536.4,NM_001243785.2	GRCh38.p13	chr11:36593620-36593668
43422	RGS19_01	RGS19	RGS19	XM_011528484.2,NM_001039467.2,XM_011528486.2,XM_005260182.3,XM_005260183.2,NM_005873.3,XM_011528485.2	GRCh38.p13	chr20:64074233-64074267
40520	NAA60_01	NAA60	NAA60	NM_001317094.2,NM_001317097.2,NM_001317096.2,NM_001317093.1,NM_001083600.3,NM_001083601.3,NM_024845.4,NM_001317095.2,NM_001317098.2	GRCh38.p13	chr16:3486257-3486292
42018	GALR3_01	GALR3	GALR3	NM_003614.2	GRCh38.p13	chr22:37823447-37823481
13453	TLCD3A_01	TLCD3A	TLCD3A	NM_024792.3,NM_001318007.1,NM_001318008.1,NM_001318006.1	GRCh38.p13	chr17:741445-741480
46660	ELP4_01	ELP4	ELP4	NM_019040.5,NM_001288725.2,NM_001288726.2	GRCh38.p13	chr11:31632249-31632298
51936	DBNL_01	DBNL	DBNL	NM_001284313.2,NM_001122956.2,NM_014063.7,NM_001284315.1,NM_001362723.2,NM_001014436.3	GRCh38.p13	chr7:44056803-44056837
49421	ALKBH8_01	ALKBH8	ALKBH8	XM_005271728.2,XR_001748035.1,XM_005271729.3,NR_165422.1,NM_001378133.1,NR_165423.1,NR_165426.1,XM_017018557.1,XM_017018553.1,NR_165425.1,NM_001301010.3,NM_138775.3,NR_165421.1,NR_165424.1	GRCh38.p13	chr11:107560770-107560819
50073	DCP1B_01	DCP1B	DCP1B	XM_011520927.3,NM_152640.5,NR_135060.1,NM_001319292.2	GRCh38.p13	chr12:1997942-2004297
44117	CNTRL_01	CNTRL	CNTRL	NM_001330762.2,XM_024447392.1,XM_006716942.1,XM_011518167.1,XM_017014223.2,XM_011518173.2,NM_001369893.1,XM_011518172.3,XR_002956747.1,NM_001369892.1,NM_001369894.1,NM_007018.6,NR_163191.1,XM_006716944.4,XM_006716940.3,XM_011518166.2,XM_011518168.2,XM_011518170.2,NM_001369895.1,XM_017014229.2,XM_017014224.2	GRCh38.p13	chr9:121125746-121125795
37172	SPRR2F_01	SPRR2F	SPRR2F	NM_001382255.1,NM_001014450.3	GRCh38.p13	chr1:153112346-153112395
43140	TP73_01	TP73	TP73	NM_001204189.2,NM_001204191.2,NM_001204186.2,NM_001204190.2,NM_001126240.3,NM_001204187.1,NM_001126241.3,NM_005427.4,NM_001204185.2,NM_001204184.2,NM_001204192.2,NM_001204188.1,NM_001126242.3	GRCh38.p13	chr1:3733505-3733554
49102	B3GALT6_01	B3GALT6	B3GALT6	NM_080605.4	GRCh38.p13	chr1:1234320-1234358
13313	SOX2_01	SOX2	SOX2	NM_003106.4	GRCh38.p13	chr3:181712819-181712853
42864	KCNJ9_01	KCNJ9	KCNJ9	NM_004983.3	GRCh38.p13	chr1:160088021-160088068
42869	MMP14_01	MMP14	MMP14	NM_004995.4	GRCh38.p13	chr14:22844766-22845285
42672	DIRAS3_01	DIRAS3	DIRAS3	NM_004675.4	GRCh38.p13	chr1:68046543-68046592
46980	MAVS_01	MAVS	MAVS	NR_037921.2,NM_001206491.1,NM_020746.5,NM_001385663.1	GRCh38.p13	chr20:3867816-3867865
40908	CDC25A_01	CDC25A	CDC25A	NM_201567.2,XM_006713434.3,XM_006713435.3,NM_001789.3,XR_001740392.2	GRCh38.p13	chr3:48174299-48174335
44450	PLA2G15_01	PLA2G15	PLA2G15	NM_001363551.2,NM_012320.4,XM_011522979.2,XM_011522980.3	GRCh38.p13	chr16:68259286-68259325
44336	CASP8AP2_01	CASP8AP2	CASP8AP2	NM_012115.4,NM_001137668.2,NM_001137667.2	GRCh38.p13	chr6:89863554-89863603
46332	CEP55_01	CEP55	CEP55	XM_011539919.1,XM_011539918.1,XM_017016373.1,XM_011539920.2,XM_017016372.1,NM_018131.5,NM_001127182.2	GRCh38.p13	chr10:93503266-93503315
42865	KIF5A_01	KIF5A	KIF5A	NM_004984.4,NM_001354705.2,XR_002957324.1	GRCh38.p13	chr12:57569399-57569578
38528	SLC14A1_01	SLC14A1	SLC14A1	XM_011526144.1,NM_001146036.3,XM_006722526.3,XM_005258329.1,XR_001753266.1,NM_001308278.2,NM_001308279.2,NM_001128588.4,NM_015865.7,XM_005258333.1,XM_024451238.1,XM_011526142.1,NM_001146037.1	GRCh38.p13	chr18:45734401-45736503
12199	H3Y1_01	H3Y1	H3Y1	NM_001355258.2	GRCh38.p13	chr5:17654998-17655040
11297	ACP2_01	ACP2	ACP2	NM_001302490.1,NM_001302489.1,NM_001357016.1,NM_001302492.1,NM_001610.4,XR_001747908.2,NM_001302491.1	GRCh38.p13	chr11:47245700-47245734
45761	PACSIN3_01	PACSIN3	PACSIN3	NM_001184975.1,XR_002957143.1,NM_016223.5,NM_001184974.2	GRCh38.p13	chr11:47179252-47179422
34778	TRIM4_01	TRIM4	TRIM4	NM_033091.3,NM_033017.4	GRCh38.p13	chr7:99892582-99892625
35186	PQBP1_01	PQBP1	PQBP1	XM_017029207.1,NM_001167989.1,NM_001032384.1,NM_001167990.1,NM_001032383.1,XM_005272571.3,NM_001032382.2,NM_001167992.1,NM_005710.2,XM_005272572.4,NM_144495.2,NM_001032381.1,XM_011543884.2	GRCh38.p13	chrX:48901206-48901240
39943	ATAD2B_01	ATAD2B	ATAD2B	XM_011532924.3,XM_005264372.4,NM_001242338.3,XM_011532920.3,NM_001354107.2,XM_006712031.4,XR_001738783.2,NM_017552.4,XM_006712030.4,XR_001738780.2,XM_011532919.3,XR_001738781.2,XR_001738782.2,XR_001738784.2,XM_011532918.3,NR_125717.2,XM_017004375.2,XM_011532925.3	GRCh38.p13	chr2:23786181-23788518
37561	BOLA2B_01	BOLA2B	BOLA2,BOLA2B	NM_001320579.1,NM_001031827.2,NM_001320607.2,NM_001039182.4,NR_135304.1	GRCh38.p13	chr16:30193048-30193365,chr16:29453706-29454023
43879	SLC12A7_01	SLC12A7	SLC12A7	XM_017008958.1,XR_925582.2,XR_925579.2,NM_006598.3,XR_925580.2,XM_011513940.2,XM_011513941.2,XM_005248231.3,XM_017008959.1,XM_011513939.3	GRCh38.p13	chr5:1051916-1051957
42563	FOXA3_01	FOXA3	FOXA3	NM_004497.3	GRCh38.p13	chr19:45873124-45873173
51322	UNC13D_01	UNC13D	UNC13D	NM_199242.3	GRCh38.p13	chr17:75828960-75830043
44395	PRDM2_01	PRDM2	PRDM2	XM_017002259.2,XM_017002261.2,XM_017002263.2,XM_017002257.1,XM_017002256.1,XR_002957562.1,XM_017002262.1,NM_001007257.3,XM_017002255.1,XM_017002260.2,NM_015866.4,NM_012231.4	GRCh38.p13	chr1:13782165-13782214
36905	TFIP11_01	TFIP11	TFIP11	NM_001346858.1,XM_024452195.1,XM_024452194.1,NM_001346857.1,NM_012143.4,NM_001008697.2,NM_001346862.1,NM_001346861.1,NM_001346859.1	GRCh38.p13	chr22:26494226-26494275
50432	DCUN1D3_01	DCUN1D3	DCUN1D3	NM_173475.4	GRCh38.p13	chr16:20860157-20860206
37213	CCDC157_01	CCDC157	CCDC157	XM_024452258.1,XM_011530263.3,XM_011530266.3,XM_011530267.3,XM_011530270.3,NM_001318335.2,XM_006724279.4,NM_001318334.2,XM_006724280.4,NM_001017437.3,XM_006724278.4,XM_011530268.3	GRCh38.p13	chr22:30366153-30366189
44132	HNRNPUL1_01	HNRNPUL1	HNRNPUL1	XM_005258463.4,NM_007040.6,XM_011526393.3,XM_011526392.3,XM_005258465.5,NM_001301016.3,NM_144732.5,XM_005258464.4,NM_001321208.2,XM_005258461.5,XM_011526395.3,XM_005258459.4,XM_011526394.3,NM_001321211.2	GRCh38.p13	chr19:41281246-41292264
36438	ZNF787_01	ZNF787	ZNF787	NM_001002836.4,XM_011526445.2,NM_001351682.2	GRCh38.p13	chr19:56103144-56103178
47151	ART4_01	ART4	ART4	NM_021071.4,NM_001354646.2	GRCh38.p13	chr12:14841130-14842993
40635	GOLGA8S_01	GOLGA8S	GOLGA8N,GOLGA8H,GOLGA8S	NM_001282494.1,NM_001355465.1,NM_001282490.1	GRCh38.p13	chr15:23368275-23368324,chr15:32607116-32607165,chr15:30617706-30617755
42383	AURKB_01	AURKB	AURKB	XM_017025308.2,XM_017025310.1,NM_001313954.2,XM_017025309.1,NM_001313955.2,NM_001256834.3,XM_017025307.2,NM_001313952.2,XM_017025311.1,NM_004217.4,NM_001313953.3,NM_001284526.2,XM_011524072.3,NM_001313950.2,NR_132730.2,NM_001313951.1,NR_132731.1	GRCh38.p13	chr17:8206573-8206622
48747	TSLP_01	TSLP	TSLP	NM_033035.5,NR_045089.1,XM_011543698.1,NM_138551.5	GRCh38.p13	chr5:111076295-111076344
40895	CD22_01	CD22	CD22	NM_001278417.2,NM_001185101.1,NM_001185099.2,NM_001185100.2,NM_001771.4	GRCh38.p13	chr19:35346642-35346691
44872	UQCRQ_01	UQCRQ	UQCRQ	NM_014402.5	GRCh38.p13	chr5:132866980-132867029
49805	ZNF23_01	ZNF23	ZNF23	NM_001381968.1,NM_001381966.1,NM_001381969.1,NM_145911.3,NM_001381967.1,NM_001381980.1,NM_001381981.1,NM_001381965.1,NM_001304494.2,NM_001381972.1,NM_001304493.2,NM_001304492.2,NM_001381970.1,NM_001381975.1,NM_001381974.1,NM_001381973.1,NM_001381977.1,NM_001381979.1,NM_001381976.1,NM_001381978.1,NM_001381971.1,NM_001381984.1	GRCh38.p13	chr16:71449557-71449606
40101	CNOT10_01	CNOT10	CNOT10	XM_017006109.2,XM_006713085.3,XM_006713084.3,XM_017006110.2,NM_015442.3,XM_017006111.2,NR_046352.2,NM_001256742.1,XR_001740089.1,XM_011533567.2,XM_017006112.2,XM_011533566.2,NM_001256741.2	GRCh38.p13	chr3:32762801-32762850
35977	HBB_01	HBB	HBB	NM_000518.5	GRCh38.p13	chr11:5225525-5225574
46342	MRM3_01	MRM3	MRM3	NM_018146.4	GRCh38.p13	chr17:783268-783317
8383	TXN2_01	TXN2	TXN2	NM_012473.4,XM_011530111.3,XM_006724226.1	GRCh38.p13	chr22:36480673-36480707
46347	ASF1B_01	ASF1B	ASF1B	NM_018154.3	GRCh38.p13	chr19:14120007-14120056
38338	KLHL33_01	KLHL33	KLHL33	NM_001109997.3,NM_001365790.2,XM_011536450.2	GRCh38.p13	chr14:20429012-20429046
44517	SNAPIN_01	SNAPIN	SNAPIN	NM_012437.6,NR_052020.1,NR_052019.1	GRCh38.p13	chr1:153659562-153661230
39635	CFAP99_01	CFAP99	CFAP99	NM_001193282.3,XM_024454046.1	GRCh38.p13	chr4:2438113-2438162
36072	ADORA2A_01	ADORA2A	ADORA2A,SPECC1L-ADORA2A	NM_001278498.1,NR_103543.2,NR_103544.2,NM_001278497.1,NM_000675.6,NM_001278500.1,NR_103546.1,NM_001278499.2	GRCh38.p13	chr22:24441115-24441164
36901	TPST2_01	TPST2	TPST2	NM_001362922.2,NM_001008566.3,NM_003595.5,NM_001362923.2,XM_024452294.1	GRCh38.p13	chr22:26526250-26528245
50337	CBLB_01	CBLB	CBLB	NM_001321799.2,NM_001321811.2,XM_017007400.1,NM_001321798.2,NM_001321797.2,NM_001321796.2,NM_001321816.2,NM_001321795.2,NM_001321791.2,NM_001321794.2,XM_011513257.1,NM_001321790.2,XR_001740339.1,NM_001321793.2,XR_001740338.1,XM_017007396.1,NM_001321788.2,NM_001321789.1,NR_135807.2,NR_135806.2,NM_001321807.2,NM_001321806.2,XM_017007398.1,NR_135808.2,XM_017007397.1,NR_135809.2,NM_001321786.1,NM_170…	GRCh38.p13	chr3:105737178-105737227
47618	TAS2R10_01	TAS2R10	TAS2R10	NM_023921.1	GRCh38.p13	chr12:10825634-10825683
42333	GNG11_01	GNG11	GNG11	NM_004126.4	GRCh38.p13	chr7:93922184-93922233
39742	MUC22_01	MUC22	MUC22	NM_001322469.1,NM_001318484.1,NM_001198815.1	GRCh38.p13	chr6:31035290-31035339
45973	RWDD2B_01	RWDD2B	RWDD2B	NM_001320724.1,NM_016940.3	GRCh38.p13	chr21:29019305-29019354
51450	ARL9_01	ARL9	ARL9	XM_005265720.4,NM_206919.2,NM_001363794.2,XM_006714036.4	GRCh38.p13	chr4:56523772-56523821
38833	ATXN1L_01	ATXN1L	ATXN1L	NM_001137675.4	GRCh38.p13	chr16:71850081-71850130
12698	NLRP2B_01	NLRP2B	NLRP2B	NM_001319967.1	GRCh38.p13	chrX:57680138-57680172
35620	PSEN1_01	PSEN1	PSEN1	NM_000021.4,XM_005267866.2,XM_005267864.3,XM_011536972.2,XM_011536973.2,NM_007318.3,XM_011536974.2	GRCh38.p13	chr14:73192798-73192847
35318	TMEM156_01	TMEM156	TMEM156	NM_024943.3,XM_024454224.1,XM_011513754.2,XM_017008629.1,NM_001303228.2,XM_011513753.2,XM_024454223.1,XM_024454222.1	GRCh38.p13	chr4:38993824-38993858
41624	RNASE3_01	RNASE3	RNASE3	NM_002935.2	GRCh38.p13	chr14:20891933-20891982
36318	ATP2B3_01	ATP2B3	ATP2B3	XM_011531177.2,XM_024452386.1,NM_001001344.2,NM_021949.3,XM_005274692.3,XM_005274689.3,XR_001755693.2,XM_011531174.2,XM_005274691.3,XM_017029553.1,XM_005274690.3	GRCh38.p13	chrX:153548721-153548770
47386	SLC17A9_01	SLC17A9	SLC17A9	NM_022082.4,NM_001302643.2,XR_936601.3,XM_011528978.2	GRCh38.p13	chr20:62964242-62964291
44525	TIMM13_01	TIMM13	TIMM13	NM_012458.4	GRCh38.p13	chr19:2426980-2427017
43190	CCR4_01	CCR4	CCR4	NM_005508.5,XM_017005687.1	GRCh38.p13	chr3:32953927-32953976
44569	PRSS50_01	PRSS50	PRSS50	NM_013270.5	GRCh38.p13	chr3:46714434-46714471
39315	FXYD6_01	FXYD6	FXYD6	NM_001164836.3,NM_001164837.2,NM_022003.4,NM_001164831.3,NM_001164832.3	GRCh38.p13	chr11:117837749-117837798
39830	FAM161A_01	FAM161A	FAM161A	NM_001201543.2,XM_017005074.1,NM_032180.3,XM_017005072.1,XM_017005073.1,NR_037710.2	GRCh38.p13	chr2:61826340-61826389
39793	CALU_01	CALU	CALU	NM_001199672.2,XM_017012659.1,NM_001219.5,NM_001130674.3,NM_001199671.2,NR_074086.2,NM_001199673.2	GRCh38.p13	chr7:128769124-128769173
41263	LYN_01	LYN	LYN	XM_017013415.2,XM_017013416.1,XM_011517529.3,NM_002350.4,NM_001111097.3	GRCh38.p13	chr8:55952067-55953832
47491	POLR1E_01	POLR1E	POLR1E	NM_001282766.1,NM_022490.4	GRCh38.p13	chr9:37503106-37503140
51351	NANOS1_01	NANOS1	NANOS1	NM_199461.4	GRCh38.p13	chr10:119032508-119032557
47556	ELOVL1_01	ELOVL1	ELOVL1	NM_022821.4,NM_001256402.2,NR_046117.2,NM_001256399.1,NM_001256401.1	GRCh38.p13	chr1:43364094-43364329
37733	DEFA1B_01	DEFA1B	DEFA3,DEFA1B,DEFA1	NM_004084.3,NM_005217.4,NM_001042500.1,NM_001302265.1,XM_011534741.2,XM_011534740.3	GRCh38.p13	chr8:6996925-6996974,chr8:6977808-6977857,chr8:7016028-7016077
42889	PIK3CD_01	PIK3CD	PIK3CD	XM_017001476.1,XM_017001477.1,NM_001350234.2,XM_024447664.1,XM_017001481.1,NM_001350235.1,XM_017001479.1,XM_017001478.1,XM_024447663.1,NM_005026.5,XM_006710687.2,XR_002956806.1,XM_006710689.2,XM_017001483.2,XM_017001482.2,XM_017001480.1,XM_024447661.1	GRCh38.p13	chr1:9724328-9724377
46060	NOTCH1_01	NOTCH1	NOTCH1	XM_011518717.2,NM_017617.5	GRCh38.p13	chr9:136495428-136495477
34882	SLC29A1_01	SLC29A1	SLC29A1	NM_001304466.2,XM_011514341.2,XM_005248880.4,NM_001372327.1,NM_001078175.3,XM_005248879.4,XM_005248876.5,XM_005248882.4,XM_024446348.1,NM_001304465.2,NM_001078177.2,XM_005248881.4,NM_001304462.2,XM_005248878.4	GRCh38.p13	chr6:44230568-44230602
42573	ILK_01	ILK	ILK	XM_024448495.1,XM_005252904.5,NM_001278442.1,XM_017017672.1,NM_001014795.3,XM_024448500.1,XM_024448494.1,XM_024448497.1,XM_024448499.1,XM_024448496.1,NM_001014794.3,XM_024448498.1,NM_001278441.2,XM_011520065.1,NM_004517.4,XM_005252905.3	GRCh38.p13	chr11:6609622-6609741
35778	LYZ_01	LYZ	LYZ	NM_000239.3	GRCh38.p13	chr12:69350272-69352268
46485	SCN3B_01	SCN3B	SCN3B	NM_001040151.2,NM_018400.4
41218	KRT31_01	KRT31	KRT31	NM_002277.3	GRCh38.p13	chr17:41393872-41393909
51495	ZDHHC24_01	ZDHHC24	ZDHHC24	NM_001348571.2,XM_011544894.2,XR_949860.3,XM_011544893.3,XM_005273874.4,XR_001747823.2,NM_207340.3	GRCh38.p13	chr11:66543766-66543800
44892	IL36A_01	IL36A	IL36A	NM_014440.3,XM_017003806.1,XM_005263639.2,XM_011510965.1	GRCh38.p13	chr2:113006009-113006058
51572	PLA2G4F_01	PLA2G4F	PLA2G4F	XR_931785.1,NR_033151.2,NM_213600.4	GRCh38.p13	chr15:42143988-42144037
41191	KCNA4_01	KCNA4	KCNA4	NM_002233.4	GRCh38.p13	chr11:30013214-30013263
36451	IGFL2_01	IGFL2	IGFL2	XM_011526501.1,XM_024451381.1,NM_001002915.2,XR_935743.2,NM_001135113.2	GRCh38.p13	chr19:46161125-46161174
42041	DGKE_01	DGKE	DGKE	XM_011525395.2,XM_017025243.2,XR_002958079.1,XR_001752671.1,XM_011525396.2,XR_001752670.2,NM_003647.3,XR_001752672.1,XM_017025244.2,XM_011525394.3	GRCh38.p13	chr17:56848792-56848841
48357	HDAC10_01	HDAC10	HDAC10	NM_032019.6,NM_001159286.2	GRCh38.p13	chr22:50249409-50249638
45925	CD320_01	CD320	CD320	NM_016579.4,NM_001165895.2	GRCh38.p13	chr19:8302461-8302495
34481	FKBP10_01	FKBP10	FKBP10	XM_011525099.3,NM_021939.4,XM_011525100.2	GRCh38.p13	chr17:41813226-41813262
39923	PPFIA2_01	PPFIA2	PPFIA2	XM_017020098.1,XM_024449245.1,XM_017020081.2,XM_024449244.1,XM_017020079.1,XM_024449243.1,XM_017020080.1,XM_017020091.2,XM_011538907.2,XM_017020088.1,XM_017020089.1,XM_011538906.2,NM_001282536.1,XM_017020110.2,XM_017020090.2,XM_024449241.1,NM_003625.5,XM_017020086.1,XM_017020120.2,XM_024449242.1,NM_001220476.2,XM_017020087.2,NM_001220477.2,NM_001220480.2,XM_017020095.2,XM_017020084.1,NM_001220474…	GRCh38.p13	chr12:81353295-81358086
43566	PRMT5_01	PRMT5	PRMT5	NM_001282953.2,NM_001282956.2,NM_006109.5,XR_001750113.2,NM_001282955.2,NM_001282954.2,XR_429287.2,NM_001039619.3	GRCh38.p13	chr14:22922485-22922534
41270	MAGEB1_01	MAGEB1	MAGEB1	NM_177415.2,NM_002363.5,NM_177404.3	GRCh38.p13	chrX:30250894-30250943
38043	RABEP1_01	RABEP1	RABEP1	NM_001291581.2,NM_004703.6,XM_017025294.2,XM_017025295.2,NM_001291582.2,XM_011524060.2,NM_001083585.3	GRCh38.p13	chr17:5335195-5335229
35847	RS1_01	RS1	RS1	NM_000330.4	GRCh38.p13	chrX:18641529-18641578
44025	GCN1_01	GCN1	GCN1	NM_006836.2	GRCh38.p13	chr12:120127473-120127522
42062	DENR_01	DENR	DENR	NM_003677.5	GRCh38.p13	chr12:122770487-122770536
37155	MAD1L1_01	MAD1L1	MAD1L1	NM_003550.3,NM_001304525.2,NM_001013836.2,NM_001304524.2,NM_001013837.2,NM_001304523.2	GRCh38.p13	chr7:1898293-1898327
40299	DNM1L_01	DNM1L	DNM1L	NM_001278465.1,XM_017018663.2,XM_011520544.2,NM_005690.4,NM_001278464.1,XM_017018665.1,NM_001330380.1,XM_017018664.1,NM_001278463.1,XM_011520543.3,NM_001278466.1,NM_012062.5,NM_012063.3	GRCh38.p13	chr12:32731388-32731437
38345	SLC35E2B_01	SLC35E2B	SLC35E2B	NM_001110781.3,XM_011542072.1,XR_002957537.1,NM_001290264.2	GRCh38.p13	chr1:1665984-1668340
51163	RGS12_01	RGS12	RGS12	XM_017008534.1,XM_017008531.2,XM_017008529.2,NM_002926.3,XM_006713906.2,XM_006713907.1,XM_017008532.1,NM_198227.2,XM_011513543.2,XM_017008533.1,NM_198229.2,XR_427479.2,XR_002959745.1,XM_006713905.1	GRCh38.p13	chr4:3422929-3422978
43617	PAX4_01	PAX4	PAX4	NM_001366110.1,NM_001366111.1	GRCh38.p13	chr7:127614551-127614907
50521	ZNF660_01	ZNF660	ZNF660	NM_173658.4	GRCh38.p13	chr3:44594453-44594502
40604	REC114_01	REC114	REC114	NM_001348772.2,NM_001042367.2	GRCh38.p13	chr15:73551021-73551055
47564	DCLRE1B_01	DCLRE1B	DCLRE1B	NM_001319947.2,NM_001363691.2,NM_022836.4,NM_001363690.2,NM_001319946.2	GRCh38.p13	chr1:113911559-113911608
34366	SYPL1_01	SYPL1	SYPL1	NM_006754.5,NM_001381913.1,NM_001381912.1,NR_167729.1,NR_167730.1,NM_001381919.1,NM_001381918.1,NM_001381915.1,NM_001381911.1,NM_001381910.1,NM_001381920.1,NM_001381916.1,NM_001381921.1,NM_182715.4,NM_001381917.1	GRCh38.p13	chr7:106091874-106091908
41318	MSH4_01	MSH4	MSH4	NM_002440.4	GRCh38.p13	chr1:75803844-75803893
40606	SMIM26_01	SMIM26	SMIM26	NM_001348957.2,NM_001348958.1	GRCh38.p13	chr20:18569242-18569276
35004	CFL2_01	CFL2	CFL2	NM_001243645.1,NM_138638.5,NR_028131.1,NR_028130.1,XM_011536363.3,NM_021914.7	GRCh38.p13	chr14:34712921-34712964
35283	RCHY1_01	RCHY1	RCHY1	NM_001278539.1,NR_103723.1,NM_001009922.2,NR_103724.1,NM_001278536.1,XM_024453984.1,XM_011531839.2,NM_001278537.1,NR_037913.1,XM_011531838.2,NR_103725.1,NM_015436.3,NR_037914.1,NM_001278538.1	GRCh38.p13	chr4:75482543-75482578
48631	PYROXD2_01	PYROXD2	PYROXD2	XM_017016837.1,XM_017016838.1,XR_001747235.1,XR_001747234.1,NM_032709.3,XM_011540293.2,XR_001747239.1,XM_017016835.1,XR_001747238.1,XR_001747240.1,XR_001747237.1,XR_001747236.1,XR_001747233.1,XM_017016836.1	GRCh38.p13	chr10:98407935-98407969
44619	PADI1_01	PADI1	PADI1	XM_011541307.2,XM_017001102.1,XR_001737131.2,XR_946620.2,NM_013358.3,XR_946617.2,XR_001737130.2,XR_946619.2,XM_017001103.2,XM_017001101.1	GRCh38.p13	chr1:17222395-17222429
46939	CYP20A1_01	CYP20A1	CYP20A1	NM_001371696.1,NM_001371701.1,NM_001371700.1,NM_001371702.1,NR_163984.1,XR_001738857.1,NR_163983.1,NM_001371699.1,NR_163982.1,NM_177538.3,NM_001371698.1,NM_001371695.1,NM_001371706.1,NM_001371703.1,XM_006712645.3,XM_006712644.4,NM_001371704.1,NM_001371697.1,NR_163981.1,NM_001371705.1,NR_163985.1	GRCh38.p13	chr2:203296851-203296888
38280	ACTN2_01	ACTN2	ACTN2	NM_001278344.1,NM_001278343.2,NM_001103.4	GRCh38.p13	chr1:236718911-236718960
39685	RNF225_01	RNF225	RNF225	NM_001195135.1	GRCh38.p13	chr19:58396713-58396758
35464	NBPF3_01	NBPF3	NBPF3	NM_001377496.1,NM_001377494.1,NM_001377491.1,XM_011542281.1,NM_032264.6,XM_024450190.1,NM_001256416.4,XM_017002501.1,NM_001256417.4,NM_001330381.3,NM_001377493.1,XM_006710959.2,NM_001377492.1,XM_006710957.1,XM_017002499.2,XM_017002502.1,NR_046176.4,NM_001377495.1	GRCh38.p13	chr1:21473475-21473510
46583	LANCL2_01	LANCL2	LANCL2	NM_018697.4
45543	RGS22_01	RGS22	RGS22	XM_005250858.3,NM_001286693.2,NM_015668.5,XM_005250857.3,XM_005250856.3,XM_005250860.3,XM_011516958.1,XM_017013310.2,XM_024447122.1,XM_017013311.1,XM_017013309.2,XM_024447121.1,XM_011516957.1,NM_001286692.2,XM_006716540.2	GRCh38.p13	chr8:100006086-100008400
39309	PYGM_01	PYGM	PYGM	NM_005609.4,NM_001164716.1	GRCh38.p13	chr11:64752027-64752403
12531	MICALCL_01	MICALCL	MICALCL	NM_032867.3	GRCh38.p13	chr11:12358361-12358399
35883	CASR_01	CASR	CASR	XM_017007325.1,XM_006713789.3,NM_000388.4,NM_001178065.2,XM_017007324.1,XM_005247837.2	GRCh38.p13	chr3:122286121-122286170
43160	ZRANB2_01	ZRANB2	ZRANB2	NM_203350.3,NM_005455.5	GRCh38.p13	chr1:71078707-71080987
45655	RBMX2_01	RBMX2	RBMX2	NM_016024.4	GRCh38.p13	chrX:130409335-130409384
45674	TMBIM4_01	TMBIM4	TMBIM4	NM_001282610.1,NM_016056.4,NM_001282606.1,NM_001282609.1	GRCh38.p13	chr12:66138021-66138070
42200	IER3_01	IER3	IER3	NM_003897.4	GRCh38.p13	chr6:30743821-30743861
40646	DKC1_01	DKC1	DKC1	NR_110022.2,NR_110023.2,NM_001288747.1,NM_001142463.3,NM_001363.5,NR_110021.2	GRCh38.p13	chrX:154777418-154777467
41778	SYT5_01	SYT5	SYT5	NM_001297774.2,XM_006723341.3,XM_006723340.3,XM_024451668.1,NM_003180.3,XM_017027175.1,XM_006723339.3	GRCh38.p13	chr19:55175824-55175861
2204	CXCL2_01	CXCL2	CXCL2	NM_002089.4	GRCh38.p13	chr4:74097286-74097335
50386	CAMKK1_01	CAMKK1	CAMKK1	NM_032294.3,XM_005256817.1,XM_024450996.1,NM_172206.2,XM_006721588.3,XR_001752662.2,XM_024450999.1,XM_024450998.1,NM_172207.2,XM_011524031.3,XM_011524035.3,XM_011524033.1,XM_024450997.1,XM_017025220.2,XR_001752661.2	GRCh38.p13	chr17:3876337-3876371
41950	ZNF207_01	ZNF207	ZNF207	NM_001098507.2,NM_003457.3,NM_001032293.2	GRCh38.p13	chr17:32367853-32367902
12033	GBP4_01	GBP4	GBP4	NM_052941.5	GRCh38.p13	chr1:89185307-89185351
35756	INSR_01	INSR	INSR	XM_011527988.2,NM_001079817.3,XM_011527989.3,NM_000208.4	GRCh38.p13	chr19:7267481-7267530
38667	ZNF213_01	ZNF213	ZNF213	NR_104432.2,NM_001134655.2,NM_004220.3	GRCh38.p13	chr16:3142644-3142681
45239	AVL9_01	AVL9	AVL9	XM_017011891.1,XM_005249670.2,XM_005249671.4,XM_005249668.2,XM_005249669.2,XR_001744608.1,XM_017011892.2,XR_926926.1,XM_011515227.2,NM_015060.3	GRCh38.p13	chr7:32544765-32548868
41228	LAIR2_01	LAIR2	LAIR2	NM_021270.5,NM_002288.6,XM_011526961.2	GRCh38.p13	chr19:54508001-54508050
38756	GKAP1_01	GKAP1	GKAP1	XM_006717293.1,XM_005252241.2,XM_011519058.2,NM_025211.4,NM_001135953.1	GRCh38.p13	chr9:83799201-83799242
48094	TMEM121_01	TMEM121	TMEM121	NM_025268.4,NM_001331238.1,XM_006720261.3	GRCh38.p13	chr14:105529046-105529095
43658	PRKAA1_01	PRKAA1	PRKAA1	NM_001355028.2,NM_206907.3,NM_001355034.1,NM_001355029.2,NM_001355036.2,XM_017009625.2,NM_006251.5,XM_017009624.1,NM_001355037.2,NM_001355035.2	GRCh38.p13	chr5:40771767-40771816
39931	CASQ1_01	CASQ1	CASQ1	NM_001231.5	GRCh38.p13	chr1:160201734-160201783
35163	APOL3_01	APOL3	APOL3	XM_024452276.1,XM_017028948.1,NM_145642.2,XM_017028951.1,XM_017028947.1,NM_014349.3,XM_017028946.1,NM_145639.2,NM_145640.2,XM_024452275.1,XM_017028952.1,NM_030644.2,XM_006724325.3,NM_145641.2,XM_017028949.1	GRCh38.p13	chr22:36141975-36142009
36087	ALDH1A3_01	ALDH1A3	ALDH1A3	NM_000693.4,NM_001293815.2	GRCh38.p13	chr15:100915461-100915510
45985	USP18_01	USP18	FAM247A,USP18,FAM247C,FAM247D,LOC105379548	XR_937989.1,XR_938017.2,XR_951230.1,NM_017414.4,XR_951363.2,XM_006724074.3	GRCh38.p13	chr22:21193319-21193368,chr22:18360611-18360660,chr22:18759064-18759113,chr22:18176819-18176868
43532	LAMC3_01	LAMC3	LAMC3	XM_006716921.2,NM_006059.4,XM_011518121.1	GRCh38.p13	chr9:131057032-131057071
41846	TPM2_01	TPM2	TPM2	XM_017015088.2,XM_017015092.2,NM_001301226.2,XM_017015087.2,XM_017015091.2,NM_001301227.1,NM_003289.4,XM_017015090.2,NM_213674.1,XM_017015093.2	GRCh38.p13	chr9:35684280-35684315
35708	FUT1_01	FUT1	FUT1	NM_001329877.1,NM_000148.4,NM_001384359.1	GRCh38.p13	chr19:48748497-48748546
49917	EID2B_01	EID2B	EID2B	NM_152361.3	GRCh38.p13	chr19:39532440-39532489
40077	CHD1L_01	CHD1L	CHD1L	NM_001348460.2,NM_004284.6,NM_001348461.2,NR_145681.2,NM_001348462.2,NM_001348451.2,NM_001348466.2,NM_001348463.2,NR_046070.3,NM_001348465.2,NM_001348452.1,XM_024451049.1,NM_001348464.2,NR_145687.2,NM_001256336.3,NM_001348455.2,NM_001256337.3,NM_001256338.3,NM_001348454.2,NM_001348457.2,XM_024451051.1,NM_001348456.2,NM_001348459.2,NM_001348458.2,XM_024451050.1,NR_145683.2,NR_145695.2,NR_145686.2,…	GRCh38.p13	chr1:147291528-147293632
50194	NUDT10_01	NUDT10	NUDT10	NM_001304963.2,NM_153183.3	GRCh38.p13	chrX:51336680-51336729
35395	SLC30A7_01	SLC30A7	SLC30A7	NM_133496.5,NM_001144884.2,XM_017000400.2,XM_017000401.2,XM_011540779.3,XR_246237.3	GRCh38.p13	chr1:100896270-100896304
50099	SAMD9L_01	SAMD9L	SAMD9L	NM_001350085.2,NM_152703.5,NM_001350084.2,NM_001303497.3,NM_001303500.3,NM_001303496.3,NM_001350083.2,NM_001303498.3,NM_001350082.2	GRCh38.p13	chr7:93130138-93130187
49382	TYW3_01	TYW3	TYW3	NM_001162916.1,NM_138467.3,NR_027962.1	GRCh38.p13	chr1:74765360-74765409
34370	ANTKMT_01	ANTKMT	ANTKMT	NM_023933.3,XR_243298.4,NM_001271285.2	GRCh38.p13	chr16:721667-721701
38532	USP8_01	USP8	USP8	NM_001128610.3,XM_006720762.3,XM_011522193.3,XM_017022721.2,XM_017022720.2,NM_005154.5,XM_024450098.1,XM_017022718.1,XM_006720761.3,NM_001283049.2,XM_017022722.1,XM_017022719.2	GRCh38.p13	chr15:50471769-50476871
48790	PSKH2_01	PSKH2	PSKH2	XM_017013929.1,NM_033126.3	GRCh38.p13	chr8:86064547-86064596
46514	EMC3_01	EMC3	EMC3	NM_018447.3	GRCh38.p13	chr3:9964036-9964085
38352	PPIL6_01	PPIL6	PPIL6	NM_001111298.2,NM_001286361.1,NM_001286360.1,NM_173672.5,NR_104429.1	GRCh38.p13	chr6:109390326-109390375
12417	KRTAP6-1_01	KRTAP6-1	KRTAP6-1	NM_181602.1	GRCh38.p13	chr21:30613841-30613875
44397	RAB3GAP1_01	RAB3GAP1	RAB3GAP1	XM_011510825.3,XR_001738674.2,NM_012233.3,NM_001172435.2,XM_011510823.3	GRCh38.p13	chr2:135113234-135115228
34380	ADAT3_01	ADAT3	ADAT3	NM_138422.4,NM_001329533.2	GRCh38.p13	chr19:1913053-1913087
42367	UXT_01	UXT	UXT	NM_004182.3,NM_153477.3,NR_045560.1,NR_045559.1	GRCh38.p13	chrX:47651887-47652121
34472	POLR1D_01	POLR1D	POLR1D	XM_017020622.1,NM_001206559.2,NM_152705.3	GRCh38.p13	chr13:27665733-27665782
38629	SATB1_01	SATB1	SATB1	XM_011533988.3,NM_001322873.2,NM_001322876.2,XM_011533989.2,NM_001322872.2,NM_001322875.1,NM_001322871.2,NM_001322874.2,XM_011533990.3,NM_001131010.4,NM_001195470.3,NM_002971.6	GRCh38.p13	chr3:18394503-18394552
45361	VPS39_01	VPS39	VPS39	XR_001751181.1,XM_017022037.1,XM_017022039.1,XM_017022036.1,NM_015289.5,XM_017022038.1,XM_011521403.2,XM_011521404.2,NM_001301138.2,XR_001751180.1	GRCh38.p13	chr15:42178520-42178569
39425	RMDN2_01	RMDN2	RMDN2	XM_017003475.2,XM_011532619.2,NM_001322211.1,XM_011532617.2,XM_017003477.2,XM_011532618.2,NM_001170791.3,XM_011532615.3,NM_144713.5,XR_939668.3,XM_011532613.3,XM_017003478.1,XM_011532616.2,XM_017003474.1,XM_017003479.1,NM_001322212.2,XM_017003476.2,XM_011532614.3,NM_001170793.2,NM_001170792.2	GRCh38.p13	chr2:37991242-37991291
46543	LRRC59_01	LRRC59	LRRC59	NM_018509.4	GRCh38.p13	chr17:50381998-50382047
148	TRAC_01	TRAC	TRAC
39604	KRTAP9-1_01	KRTAP9-1	KRTAP9-1	NM_001190460.1	GRCh38.p13	chr17:41190513-41190553
47233	PRUNE1_01	PRUNE1	PRUNE1	XM_011509832.2,NM_001303243.2,NM_001303242.2,NR_130132.2,XM_017001957.1,NM_001303229.2,NR_130131.2,XM_017001956.1,NM_021222.3,XM_005245393.5,NR_130130.2,NR_130135.2,XM_017001955.2	GRCh38.p13	chr1:151035477-151035526
45700	MPC1_01	MPC1	MPC1	NM_001376565.1,NR_073093.2,NR_164828.1,XM_011535895.2,NM_001270879.2,NR_164831.1,NM_001376566.1,NM_001376567.1,XM_024446456.1,NR_164829.1,NM_001376568.1,NR_164830.1,NM_001376569.1,NM_016098.4	GRCh38.p13	chr6:166366091-166366828
48524	ZNF333_01	ZNF333	ZNF333	NM_001352243.2,XM_017027370.1,XM_011528371.2,XM_011528363.2,XM_011528368.2,XM_017027369.1,XM_011528367.2,XM_017027367.1,XM_011528369.2,NM_001352241.2,XM_024451741.1,NM_032433.4,NM_001352240.2,XM_024451740.1,NM_001352244.2,NM_001352239.2,NM_001300912.2,XM_011528362.2,XM_011528365.2	GRCh38.p13	chr19:14717023-14717062
46527	USE1_01	USE1	USE1	NM_018467.4,XM_017026976.1	GRCh38.p13	chr19:17219672-17219706
37249	FRMPD2_01	FRMPD2	FRMPD2	NM_001318191.1,XM_011539327.2,NM_001018071.4	GRCh38.p13	chr10:48212035-48212083
40542	PCNP_01	PCNP	PCNP	NR_135229.1,NR_135226.1,NR_135230.1,NM_001320395.1,NM_020357.3,NR_135223.1,NR_135231.1,NR_135227.1,NR_135224.1,NM_001320400.1,NR_135228.1,NM_001320401.1,NM_001320398.1,NM_001320397.1,NM_001320399.1,NR_135232.1,NR_135225.1,XM_017006922.1	GRCh38.p13	chr3:101592654-101592703
48858	MICALL1_01	MICALL1	MICALL1	XM_005261791.3,XM_011530473.2,XM_017029026.1,XM_011530472.2,XM_005261792.3,XM_011530475.2,XM_011530471.2,NM_033386.4	GRCh38.p13	chr22:37941973-37942014
46319	DALRD3_01	DALRD3	DALRD3	XM_011533892.2,XR_940464.3,NM_001009996.3,XM_011533893.2,XM_011533891.2,XM_006713219.2,XM_017006723.1,NM_001276405.1,NM_018114.5,XR_001740191.2,XM_005265269.4	GRCh38.p13	chr3:49016196-49016245
44084	HSPA13_01	HSPA13	HSPA13	NM_006948.5	GRCh38.p13	chr21:14374267-14375683
49644	TET3_01	TET3	TET3	XM_011532684.2,XM_011532685.2,XM_011532688.2,NM_001366022.1,NM_001287491.2,XM_024452745.1,XM_017003566.1,XM_011532686.2,XM_011532683.2,XM_011532690.1,XM_011532682.2,XM_011532687.2,XM_024452746.1,XM_024452747.1	GRCh38.p13	chr2:74080518-74080564
35697	F5_01	F5	F5	NM_000130.5,XM_017000660.2	GRCh38.p13	chr1:169523880-169524861
35906	IL4R_01	IL4R	IL4R	XM_011545826.2,XM_011545830.2,NM_000418.4,XM_011545827.2,XM_011545828.2,XM_011545829.1,XM_011545834.2,XM_017023211.1,XM_011545832.1,XM_011545825.1,XM_011545833.2,NM_001257407.2,XM_005255308.2,XM_006721043.1,NM_001257406.2,NM_001257997.2,XM_011545831.1	GRCh38.p13	chr16:27362650-27362686
37908	PPM1N_01	PPM1N	PPM1N	XR_001753603.2,XR_002958254.1,NM_001080401.1	GRCh38.p13	chr19:45502225-45502274
47325	SPCS3_01	SPCS3	SPCS3	NM_021928.4	GRCh38.p13	chr4:176328230-176328277
45186	BTBD3_01	BTBD3	BTBD3	NM_001282552.2,NM_001282551.1,NM_001282550.1,NM_014962.4,NM_001282554.1,NM_181443.3,XM_017027728.2,XM_017027730.2	GRCh38.p13	chr20:11925004-11925053
47978	FBXL18_01	FBXL18	FBXL18	NM_001363441.2,NM_024963.6,NM_001321213.2,NM_001367780.1,NM_001363442.2,NM_001367781.1	GRCh38.p13	chr7:5501274-5501308
37092	ABI1_01	ABI1	ABI1	NM_001348029.1,NM_001012750.3,NM_001012751.2,XM_011519289.2,NM_001178120.1,NM_001178121.1,NM_001178119.1,NM_001178122.1,NM_001178123.1,NM_001348034.1,XM_005252332.4,NM_001348032.1,NM_005470.3,XM_005252333.4,NM_001178116.1,NM_001178124.1,NM_001178125.1,NM_001348033.1,NR_145410.1,NM_001348031.1,NM_001348030.1,NM_001012752.2,XM_017015459.1	GRCh38.p13	chr10:26768973-26770274
43980	SYNGAP1_01	SYNGAP1	SYNGAP1	NM_001130066.2,NM_006772.3	GRCh38.p13	chr6:33438493-33438542
46350	SLC4A1AP_01	SLC4A1AP	SLC4A1AP	NM_018158.2	GRCh38.p13	chr2:27664501-27664550
51153	UTS2B_01	UTS2B	UTS2B	NM_198152.4	GRCh38.p13	chr3:191330441-191330475
45887	MRPL51_01	MRPL51	MRPL51	NM_016497.4	GRCh38.p13	chr12:6492267-6492316
37391	PLAA_01	PLAA	PLAA	XM_017015319.2,NM_001321546.1,XM_011518072.3,XR_001746420.2,NM_001031689.3	GRCh38.p13	chr9:26935107-26935156
49515	SLC17A8_01	SLC17A8	SLC17A8	NM_139319.3,NM_001145288.2	GRCh38.p13	chr12:100380946-100391042
40687	EN2_01	EN2	EN2	NM_001427.4	GRCh38.p13	chr7:155464063-155464112
38054	WBP1L_01	WBP1L	WBP1L	NM_001083913.2,XM_011539913.2,NM_017787.5,XM_017016360.1	GRCh38.p13	chr10:102815056-102815105
43362	RBM5_01	RBM5	RBM5	XR_427245.2,XM_011533262.2,XM_017005503.1,XM_017005505.1,XM_024453289.1,XM_024453290.1,XM_006712917.2,NM_005778.4,NR_036627.3	GRCh38.p13	chr3:50105620-50105669
34583	PARP10_01	PARP10	PARP10	NM_001317895.2,NM_032789.5,XM_011517336.3,NR_134234.2	GRCh38.p13	chr8:143986120-143986154
36730	HNRNPL_01	HNRNPL	HNRNPL	NM_001385651.1,NM_001005335.2,XR_243927.2,XM_024451480.1,XM_024451481.1,XM_011526888.2,NM_001533.3,XM_024451482.1,XM_024451483.1,XM_024451479.1	GRCh38.p13	chr19:38845984-38846029
35837	PEX2_01	PEX2	PEX2	NM_001172087.1,NM_000318.3,NM_001172086.1,NM_001079867.1	GRCh38.p13	chr8:76984007-76984056
49683	FCSK_01	FCSK	FCSK	XR_001751856.2,XR_001751857.2,NM_145059.3,XM_017023012.2,XR_002957790.1,XR_001751854.2,XM_017023013.2,XM_011522928.1,XM_006721162.2,XM_011522929.1,XM_024450180.1,XR_002957789.1,XM_024450181.1,XR_002957788.1,XM_011522931.3	GRCh38.p13	chr16:70472549-70472585
36047	SERPINA5_01	SERPINA5	SERPINA5	NM_000624.6	GRCh38.p13	chr14:94592704-94592750
47507	EBF2_01	EBF2	EBF2	NM_022659.4	GRCh38.p13	chr8:25850732-25858338
45308	NBEAL2_01	NBEAL2	NBEAL2	XM_017006011.1,XM_006713072.3,XM_017006010.1,XM_017006015.1,NM_015175.3,XM_017006014.1,XM_011533533.2,XR_940397.2,XR_940398.1,NM_001365116.2,XM_017006012.1,XM_017006017.1,XM_017006013.1,XM_017006016.1	GRCh38.p13	chr3:47002416-47002465
34898	PLEKHJ1_01	PLEKHJ1	PLEKHJ1	NM_001300836.2,NM_018049.3,XM_017026927.1,XM_017026928.1,XM_017026925.1	GRCh38.p13	chr19:2234191-2234225
36169	GABRA6_01	GABRA6	GABRA6	NM_000811.3	GRCh38.p13	chr5:161686336-161686972
49442	C7orf31_01	C7orf31	C7orf31	NM_001371351.1,NM_001371352.1,NM_138811.4	GRCh38.p13	chr7:25179251-25179285
48940	STX1B_01	STX1B	STX1B	NM_052874.5,XM_017022893.1	GRCh38.p13	chr16:30989980-30990029
41988	PLA2G10_01	PLA2G10	PLA2G10	NR_133651.1,NM_003561.3	GRCh38.p13	chr16:14672646-14672695
42159	RIOK3_01	RIOK3	RIOK3	XR_002958189.1,NM_001348193.2,NR_145477.2,NM_003831.5,XM_011526243.1,XM_011526242.1	GRCh38.p13	chr18:23477228-23479325
41851	CRISP2_01	CRISP2	CRISP2	XM_005249352.3,XR_002956300.1,NM_001142417.3,XR_002956301.1,XR_002956302.1,XM_011514841.1,NM_003296.4,XM_005249353.4,NM_001142408.3,NM_001261822.1,XR_926302.3,XM_005249349.1,XM_005249351.3,NM_001142407.3,XM_011514842.1,XM_011514843.3,XM_005249350.1,XR_002956303.1,NM_001142435.3,XM_005249356.1,XR_926303.2	GRCh38.p13	chr6:49698446-49698495
13186	SELENOM_01	SELENOM	SELENOM	NM_080430.4	GRCh38.p13	chr22:31105088-31105122
49827	MRGPRX1_01	MRGPRX1	MRGPRX1	NM_147199.3	GRCh38.p13	chr11:18934236-18934285
50490	LMNTD2_01	LMNTD2	LMNTD2	XM_017017479.2,XM_017017477.1,XM_011519967.2,XM_017017476.1,XM_017017478.1,NM_173573.3,XM_011519965.2	GRCh38.p13	chr11:555860-555896
36773	OR5H14_01	OR5H14	OR5H14	NM_001005514.2
39240	ARL13A_01	ARL13A	ARL13A	NM_001162491.2,NR_103708.2,XM_011530950.2,NR_103709.2,XM_011530951.2	GRCh38.p13	chrX:100985803-100985852
50962	TMED7_01	TMED7	TMED7	NM_181836.6	GRCh38.p13	chr5:115614813-115614862
34659	GAA_01	GAA	GAA	XM_005257193.2,NM_000152.5,NM_001079804.3,XM_005257194.4,NM_001079803.3	GRCh38.p13	chr17:80105762-80105796
44845	SACS_01	SACS	SACS	XM_017020539.1,XM_024449337.1,NM_001278055.2,XM_011535039.2,NM_014363.6,XM_005266338.2	GRCh38.p13	chr13:23355628-23355675
48453	RTL6_01	RTL6	RTL6	NM_032287.3	GRCh38.p13	chr22:44496600-44496649
11550	CCDC34_01	CCDC34	CCDC34	NM_080654.2,NM_030771.2	GRCh38.p13	chr11:27362991-27363025
34600	RIOK1_01	RIOK1	RIOK1	NM_031480.3,XM_011514933.3,NM_001348194.1	GRCh38.p13	chr6:7414288-7414322
50519	EPHA6_01	EPHA6	EPHA6	XR_001740110.1,XM_006713592.3,XM_017006214.1,XM_017006211.1,NM_001080448.3,XM_017006210.1,XM_017006220.1,XM_017006217.1,XM_017006216.1,XM_017006213.1,NM_001278300.2,XM_017006212.1,NM_173655.4,XM_017006223.1,XM_017006218.1,XM_017006215.1	GRCh38.p13	chr3:97448680-97448729
40205	NTAN1_01	NTAN1	NTAN1	NM_001270767.1,XM_011522355.2,NM_173474.4,NM_001270766.1	GRCh38.p13	chr16:15040007-15040051
37482	ERP29_01	ERP29	ERP29	NM_006817.4,NM_001034025.1,XM_017018720.1	GRCh38.p13	chr12:112022754-112022793
50335	MLX_01	MLX	MLX	NM_198204.2,NM_170607.2,NM_198205.1	GRCh38.p13	chr17:42569266-42569518
42985	CALML3_01	CALML3	CALML3	NM_005185.4	GRCh38.p13	chr10:5525685-5525727
44715	FAM32A_01	FAM32A	FAM32A	NM_014077.4,XM_011527898.1	GRCh38.p13	chr19:16191748-16191792
39250	C17orf99_01	C17orf99	C17orf99	XM_017023997.1,NM_001163075.2,XM_017023998.1,XM_011524152.2,XM_017024000.1,XM_017024001.1	GRCh38.p13	chr17:78161115-78161149
37835	TMEM231_01	TMEM231	TMEM231	NR_074083.2,NM_001077418.3,NM_001077416.2	GRCh38.p13	chr16:75539539-75539588
37493	SORBS1_01	SORBS1	SORBS1	XM_011539150.2,XM_017015536.1,XM_017015539.1,XM_017015511.2,NM_001384451.1,XM_011539140.2,NM_001377208.1,NM_001384450.1,NM_001377203.1,NM_001377199.1,XM_017015512.1,NM_001034954.2,XM_017015505.2,XM_017015513.1,NM_001034955.2,NM_001384453.1,XM_017015501.2,XM_017015508.2,NM_001384448.1,NM_001384460.1,NM_001384449.1,NM_001377200.1,NM_001384461.1,XM_017015514.1,NM_001377201.1,NM_001377198.1,XM_017015…	GRCh38.p13	chr10:95313767-95313816
36568	OR10Z1_01	OR10Z1	OR10Z1	NM_001004478.2
37322	TAF5L_01	TAF5L	TAF5L	XM_011544164.2,XM_005273099.4,NM_001025247.2,XM_011544162.1,XM_011544163.1,NM_014409.3,XM_017001045.1,XM_005273100.2	GRCh38.p13	chr1:229602649-229602698
41289	ME1_01	ME1	ME1	XM_011535836.3,NM_002395.6	GRCh38.p13	chr6:83223810-83223859
49367	CGAS_01	CGAS	CGAS	NM_138441.3	GRCh38.p13	chr6:73440227-73440276
41448	PI3_01	PI3	PI3	NM_002638.4	GRCh38.p13	chr20:45176082-45176131
12454	LNPEP_01	LNPEP	LNPEP	XM_024446045.1,NM_175920.4,NM_005575.3	GRCh38.p13	chr5:96979535-96979576
38610	RTCA_01	RTCA	RTCA	XM_005271299.4,XM_005271298.5,XM_017002669.1,NM_003729.4,NM_001130841.1	GRCh38.p13	chr1:100274904-100274953
40324	RBPJL_01	RBPJL	RBPJL	XM_011528521.2,XR_936496.2,XM_011528522.2,XM_011528523.2,NM_001281448.2,NM_001281449.2,NM_014276.4,XR_936497.2	GRCh38.p13	chr20:45312375-45313490
39553	GYG2_01	GYG2	GYG2	NM_001184703.1,XM_017029928.1,NM_001184702.1,NM_003918.2,XM_017029927.1,NM_001184704.1,XM_017029931.1,XM_011545600.2,XM_017029930.1,NM_001079855.2,XM_017029929.1	GRCh38.p13	chrX:2882014-2882063
45749	CPSF3_01	CPSF3	CPSF3	NM_001321835.1,NM_001321834.1,NM_001321833.1,NM_001321836.1,NM_016207.4	GRCh38.p13	chr2:9441862-9441911
49307	RHBDL3_01	RHBDL3	RHBDL3	NM_001363835.1,NM_138328.3,XM_017024275.1,XM_017024274.1,XM_017024277.1,XM_017024280.1,NM_001363836.1,XR_001752439.1,XM_017024279.2,NM_001330181.2,XM_017024278.1,XM_006721734.3,XM_017024276.1,XM_017024273.1,NM_001363834.1	GRCh38.p13	chr17:32294296-32294345
35506	ABCD4_01	ABCD4	ABCD4	NM_001353602.2,XM_017021539.1,XR_001750480.2,NM_001353603.2,XM_017021540.2,XR_001750481.2,NR_148474.2,XM_017021541.2,XM_005267942.4,NM_020324.3,NM_001353594.2,NM_020325.3,XM_017021542.1,XM_017021534.1,XR_002957565.1,NR_003256.3,NM_001353593.2,NM_001353597.2,XM_024449679.1,NR_148467.2,XR_001750476.2,NM_001353608.2,NR_148472.2,NM_001353604.2,NM_001353609.2,XM_011537041.2,NM_005050.4,NM_001353605.2,…	GRCh38.p13	chr14:74290377-74290411
38603	CLEC2A_01	CLEC2A	CLEC2A	NM_207375.3,NM_001130711.2,XM_011520657.2,XM_011520654.2,XM_011520656.3	GRCh38.p13	chr12:9926293-9926342
51228	DGAT2L6_01	DGAT2L6	DGAT2L6	NM_198512.3	GRCh38.p13	chrX:70204347-70204396
34929	MGAM2_01	MGAM2	MGAM2	NM_001293626.2,XM_024446997.1,XM_011516693.2,XM_011516692.2,XR_927547.2,XM_011516694.2	GRCh38.p13	chr7:142175706-142175740
51950	FCGR2C_01	FCGR2C	FCGR2C,FCGR2A	NM_001375296.1,NM_001136219.3,NM_021642.5,NM_001375297.1,NR_047648.1,XM_011509291.1,XM_024454041.1,NM_201563.5	GRCh38.p13	chr1:161599883-161599923,chr1:161518228-161518268
49267	ZNF418_01	ZNF418	ZNF418	XM_017026309.1,XM_017026308.2,XM_017026314.2,XM_017026310.1,XM_017026306.2,XM_017026311.1,NM_001317029.2,NM_001317027.2,XM_017026305.2,NM_001317030.2,XM_017026304.2,NM_001317028.2,XM_017026312.1,XM_017026313.1,NM_133460.3	GRCh38.p13	chr19:57926315-57926364
11536	CASTOR2_01	CASTOR2	CASTOR2	NM_001145064.3,XM_017012574.1	GRCh38.p13	chr7:75018034-75018068
39721	PLD5_01	PLD5	PLD5	XM_011544115.2,XM_017000570.2,XM_011544122.3,XM_011544119.2,NM_001195811.1,XM_011544116.2,XM_017000569.1,XM_017000568.2,XM_011544120.2,XM_024453867.1,NM_001320272.2,XM_011544121.2,NM_001195812.2,NM_001372062.1,XM_017000567.2	GRCh38.p13	chr1:242089463-242089512
39432	ASMT_01	ASMT	ASMT	NM_001171038.2,NM_001171039.1,NM_004043.2	GRCh38.p13	chrX:1615263-1623177
52052	SLC12A6_01	SLC12A6	SLC12A6	NM_001365088.1,XM_006720793.4,NM_005135.2,NM_001042494.2,NM_001042495.2,XM_011522269.3,NM_133647.1,NM_001042496.2,XR_931960.3,NM_001042497.2	GRCh38.p13	chr15:34258910-34258944
44750	SCN8A_01	SCN8A	SCN8A	NM_001369788.1,NM_001330260.2,NM_014191.4,NM_001177984.2	GRCh38.p13	chr12:51699681-51699730
41134	HPD_01	HPD	HPD	NM_002150.3,NM_001171993.1	GRCh38.p13	chr12:121854779-121856349
36595	OR4C3_01	OR4C3	OR4C3	NM_001004702.2	GRCh38.p13	chr11:48325039-48325088
41022	EVPL_01	EVPL	EVPL	NM_001988.4,NM_001320747.2	GRCh38.p13	chr17:76007858-76007897
39518	LGALS3_01	LGALS3	LGALS3	NM_002306.4,NR_003225.2,NM_001357678.2	GRCh38.p13	chr14:55140340-55142609
40318	GPR132_01	GPR132	GPR132	NM_013345.4,NM_001278696.2,NM_001278695.2,NM_001278694.2	GRCh38.p13	chr14:105051491-105051540
42454	BNIP3L_01	BNIP3L	BNIP3L	NM_001330491.2,NM_004331.3	GRCh38.p13	chr8:26391279-26391328
40483	TSACC_01	TSACC	TSACC	NR_130913.2,NM_001304821.2,NM_001304822.2,NM_001304826.2,NM_001304823.2,NM_001304817.2,NM_144627.4,NM_001304820.1,NM_001304819.2,NM_001304824.2,NM_001304818.2,NM_001304825.2	GRCh38.p13	chr1:156346828-156346877
34350	PAGE4_01	PAGE4	PAGE4	NM_001318877.1,NM_007003.4	GRCh38.p13	chrX:49832607-49832641
39404	PDZD3_01	PDZD3	PDZD3	XM_011543000.2,NR_033122.2,XM_011543001.2,XM_017018335.1,XM_017018334.1,XM_011543002.2,NM_001168468.2,XM_011543005.2,NM_024791.4,XM_017018337.1,XM_017018336.1	GRCh38.p13	chr11:119187410-119187459
36950	KIAA0930_01	KIAA0930	KIAA0930	NM_001009880.2,NM_015264.2,XM_011530017.2,XM_017028672.1	GRCh38.p13	chr22:45195855-45195904
40843	ATP6V1B2_01	ATP6V1B2	ATP6V1B2	XR_002956632.1,NM_001693.4,XR_002956633.1	GRCh38.p13	chr8:20209482-20209531
45572	RDH8_01	RDH8	RDH8	NM_015725.4	GRCh38.p13	chr19:10020718-10020767
41199	KCNK1_01	KCNK1	KCNK1	XM_011544184.2,NM_002245.4	GRCh38.p13	chr1:233666792-233666841
36303	RPL30_01	RPL30	RPL30	NM_000989.4	GRCh38.p13	chr8:98044954-98045003
38482	MYRF_01	MYRF	MYRF	XM_005274223.1,XM_011545234.2,XM_005274228.1,XM_005274227.1,NM_013279.4,XM_005274224.1,XM_005274226.1,XM_024448677.1,XM_005274225.1,NM_001127392.3,XM_005274222.1	GRCh38.p13	chr11:61787322-61787371
11566	CCL22_01	CCL22	CCL22	NM_002990.5	GRCh38.p13	chr16:57358820-57358854
34972	SETD9_01	SETD9	SETD9	NM_001171990.3,XM_011543140.3,NR_136555.2,NM_153706.4,NM_001323020.2,XM_005248426.4,NR_136556.1,NM_001323018.1,NR_136557.1,NM_001323019.2,NM_001323022.1,NR_136558.2,XM_011543139.2	GRCh38.p13	chr5:56913057-56913106
48907	RPL36_01	RPL36	RPL36	NM_015414.4,NM_033643.3	GRCh38.p13	chr19:5691346-5691389
41786	TBCE_01	TBCE	TBCE	NM_001079515.3,NM_001287801.2,NM_003193.5,NM_001287802.1	GRCh38.p13	chr1:235380047-235380096
45382	CRTC1_01	CRTC1	CRTC1	XM_006722710.3,XM_017026536.1,XM_005259836.3,XM_017026538.2,XM_005259833.3,NM_001098482.2,XM_024451434.1,XM_011527842.3,XM_005259834.1,NM_015321.3,XM_017026537.1,XM_005259835.3	GRCh38.p13	chr19:18753521-18753555
44778	ADAMTS3_01	ADAMTS3	ADAMTS3	NM_014243.3,XM_011532422.3,XM_011532421.2	GRCh38.p13	chr4:72309513-72311089
37492	KCNIP3_01	KCNIP3	KCNIP3	XR_922912.1,NM_013434.5,NM_001034914.2	GRCh38.p13	chr2:95375145-95375191
41291	MEF2C_01	MEF2C	MEF2C	NM_001364337.1,NM_001364332.1,NM_001364338.1,NM_001193349.2,NM_001364333.2,NM_001364343.1,NM_001193348.1,XM_024446059.1,NM_001364342.1,NM_001364329.2,NM_001364334.1,XM_011543397.3,NM_001364331.2,NM_001308002.3,NM_002397.5,XM_024446057.1,NM_001193350.2,XM_024446056.1,NM_001364354.2,NM_001364355.2,XM_011543396.3,XM_017009475.2,NM_001364356.1,NM_001364352.2,NM_001364357.1,XM_017009478.2,NM_001364353…	GRCh38.p13	chr5:88722204-88722253
42789	NAPSA_01	NAPSA	NAPSA,NAPSB	NR_002798.1,XM_011527540.1,NM_004851.3,XM_017027512.1	GRCh38.p13	chr19:50361101-50361672,chr19:50336666-50337026
48232	ZNF93_01	ZNF93	ZNF93	NM_031218.4	GRCh38.p13	chr19:19935144-19935178
47731	CEP70_01	CEP70	CEP70	XM_017007273.1,XM_017007284.1,NM_001288966.1,XM_017007277.1,NM_001288967.2,NM_024491.4,NM_001288964.2,NM_001288965.2,XM_017007271.1,XM_017007283.1,XM_017007282.2,XM_024453781.1,XM_024453780.1,XM_017007276.2,XM_017007281.2,XM_017007280.2,XM_017007274.1,NM_001320598.2,XM_017007275.1,NM_001320599.2,XM_017007278.2,XM_017007279.1,XM_017007272.1	GRCh38.p13	chr3:138500119-138500166
49729	ZG16B_01	ZG16B	ZG16B	NM_145252.3
51396	LURAP1L_01	LURAP1L	LURAP1L	XM_005251443.3,NM_203403.2	GRCh38.p13	chr9:12775105-12775154
42822	PDIA4_01	PDIA4	PDIA4	NM_001371245.1,NM_004911.5,NR_163909.1,NR_163908.1,NR_163905.1,NR_163906.1,NM_001371244.1,NR_163907.1	GRCh38.p13	chr7:149004104-149004153
51585	CHCHD10_01	CHCHD10	CHCHD10	NR_125756.2,NM_213720.3,NM_001301339.2,NR_125755.2	GRCh38.p13	chr22:23766199-23766236
11503	C3orf85_01	C3orf85	C3orf85	NR_161294.1,NM_001351622.2	GRCh38.p13	chr3:109136719-109136855
43158	ZBTB22_01	ZBTB22	ZBTB22	NM_001145338.1,NM_005453.5	GRCh38.p13	chr6:33314837-33314886
48528	SLX4_01	SLX4	SLX4	XM_017023775.2,XM_011522715.3,XM_024450471.1,NM_032444.4	GRCh38.p13	chr16:3590250-3590299
46857	PCDH9_01	PCDH9	PCDH9	NM_001318373.2,NM_001318372.2,NM_020403.5,XM_011535099.2,NM_001318374.2,NM_203487.3,XM_005266408.4,XM_017020620.2,XM_017020619.2,XM_017020621.2	GRCh38.p13	chr13:67225448-67225497
36922	SLC35D3_01	SLC35D3	SLC35D3	NM_001008783.3	GRCh38.p13	chr6:136924617-136924666
37280	MSS51_01	MSS51	MSS51	NM_001024593.2	GRCh38.p13	chr10:73424732-73425106
46952	TMCC3_01	TMCC3	TMCC3	NM_020698.4,NM_001301036.2	GRCh38.p13	chr12:94570065-94570114
44103	LRRC23_01	LRRC23	LRRC23	NM_201650.3,NM_006992.4,NM_001135217.2	GRCh38.p13	chr12:6906618-6907318
41186	IVD_01	IVD	IVD	XM_006720495.3,NM_001159508.3,XR_001751263.1,NR_148925.2,XM_017022150.1,XM_017022154.2,NM_001354601.3,XM_017022158.2,NM_002225.5,NM_001354600.3,XM_017022155.2,XR_001751264.1,NM_001354597.3,NM_001354599.3,XM_017022153.1,XM_017022149.1,NM_001354598.3,XM_017022157.1	GRCh38.p13	chr15:40410684-40410720
41547	PSMD2_01	PSMD2	PSMD2	NM_002808.5,NM_001278709.2,NM_001278708.2	GRCh38.p13	chr3:184302454-184302503
12591	MSMB_01	MSMB	MSMB	NM_138634.2,NM_002443.4	GRCh38.p13	chr10:46033493-46033527
41728	SNX2_01	SNX2	SNX2	NM_001278199.1,NM_003100.4	GRCh38.p13	chr5:122818873-122818922
43222	KRT16_01	KRT16	KRT16	NM_005557.4	GRCh38.p13	chr17:41610006-41610215
39040	EXOC7_01	EXOC7	EXOC7	XM_024450668.1,XM_024450670.1,XR_001752458.2,XM_024450674.1,NM_015219.5,NM_001145298.4,NM_001375974.1,XM_006721788.4,NM_001375975.1,NM_001013839.4,XM_024450672.1,NM_001282314.2,NM_001145297.4,XM_024450669.1,NM_001282313.1,NM_001375976.1,NM_001145299.4	GRCh38.p13	chr17:76101833-76103379
34666	ADAMTS7_01	ADAMTS7	ADAMTS7	XM_005254137.4,XM_011521166.2,NM_014272.5	GRCh38.p13	chr15:78771778-78771812
12480	MAGEA1_01	MAGEA1	MAGEA1	NM_004988.5	GRCh38.p13	chrX:153182592-153182626
50200	GJB4_01	GJB4	GJB4	NM_153212.3,XM_011540679.2	GRCh38.p13	chr1:34761678-34761727
44289	CASC3_01	CASC3	CASC3	XR_934422.3,XR_001752451.2,XM_005257163.2,XR_002957985.1,XR_002957984.1,NM_007359.5	GRCh38.p13	chr17:40171616-40171665
44142	ZWINT_01	ZWINT	ZWINT	NM_007057.4,XR_428692.3,NM_001005413.1,XM_017015605.2,NM_032997.2,XM_024447784.1	GRCh38.p13	chr10:56358048-56358097
36355	OR4F15_01	OR4F15	OR4F15	NM_001001674.2
41997	ZNF282_01	ZNF282	ZNF282	NM_003575.4,NM_001303481.2,XM_006716151.4	GRCh38.p13	chr7:149225638-149225682
50182	RBM24_01	RBM24	RBM24	NM_001143942.2,NM_153020.2,XM_005248932.3,XM_011514389.2,NM_001143941.1,XM_011514388.2,XM_011514387.2	GRCh38.p13	chr6:17292643-17292692
52005	NOP9_01	NOP9	NOP9	NM_174913.3,XM_005267385.1,XM_011536526.2,XM_011536527.2,NM_001286367.2	GRCh38.p13	chr14:24300416-24300450
36489	MED15_01	MED15	MED15	NM_001293234.2,NM_001293235.2,XR_002958699.1,NM_001003891.3,XR_002958692.1,XR_002958693.1,XR_002958696.1,XR_002958702.1,XR_002958697.1,NM_015889.5,XR_002958703.1,NM_001293236.2,NM_001293237.2,XR_002958700.1,XR_002958694.1,XR_002958701.1,XR_002958695.1,XR_002958698.1	GRCh38.p13	chr22:20586770-20586819
48916	SLC26A7_01	SLC26A7	SLC26A7	NM_001282357.2,NM_052832.4,NM_001282356.2,NM_134266.2	GRCh38.p13	chr8:91249757-91249806
43188	SCARB1_01	SCARB1	SCARB1	NM_001367981.1,NM_001367984.1,NM_001367985.1,NM_001082959.2,NR_160424.1,NR_160421.1,NR_160419.1,NM_001367982.1,NM_001367983.1,NM_001367986.1,NM_001367987.1,NR_160423.1,NM_001367989.1,NM_005505.5,NR_160416.1,NR_160417.1	GRCh38.p13	chr12:124810205-124810254
52057	SNAP47_01	SNAP47	SNAP47	NM_001323931.1,NM_001323930.1,NR_136655.1,NM_053052.4,NM_001323935.1,NR_136654.1,XM_017000232.1,NM_001323934.1,XM_006711734.3,XM_017000231.2,NM_001323933.1,NR_136657.2,NM_001323932.1,NR_136656.1	GRCh38.p13	chr1:227759247-227759281
36292	RPL6_01	RPL6	RPL6	NM_001320141.2,NM_001320137.2,NM_001320138.2,NM_001320140.2,NM_001320139.2,XM_017019782.1,NM_001024662.3,NM_000970.5,NM_001320142.1,XM_017019781.1	GRCh38.p13	chr12:112405985-112406034
2071	CRP_01	CRP	CRP	NM_001329057.2,NM_000567.3	GRCh38.p13	chr1:159713958-159714007
46879	DOLPP1_01	DOLPP1	DOLPP1	NR_072983.2,NM_001135917.2,NM_020438.5,XR_002956797.1	GRCh38.p13	chr9:129089713-129089762
42523	EPHB1_01	EPHB1	EPHB1	XM_017005866.2,XM_024453390.1,NM_004441.5,XM_024453389.1,XM_017005867.1	GRCh38.p13	chr3:135166019-135166067
42427	RAB3D_01	RAB3D	RAB3D	NM_004283.4	GRCh38.p13	chr19:11323659-11323708
46009	SURF2_01	SURF2	SURF2	NM_017503.5,NM_001278928.2	GRCh38.p13	chr9:133360431-133361104,chr9:133360434-133361104
46571	KMT2E_01	KMT2E	KMT2E	XM_017012435.2,XM_005250493.1,NM_182931.3,XR_001744836.2,XM_011516400.2,NM_018682.3,XM_024446837.1	GRCh38.p13	chr7:105078871-105078920
51370	FOXM1_01	FOXM1	FOXM1	NM_001243089.2,NM_202003.3,XM_011520933.1,XM_011520932.1,XM_011520934.3,XM_005253676.4,XM_011520935.1,XR_931507.1,XM_011520931.3,NM_202002.3,XM_011520930.3,NM_001243088.1,NM_021953.4	GRCh38.p13	chr12:2868574-2868623
42520	ENSA_01	ENSA	ENSA	NM_207047.1,NM_207042.2,NM_207168.1,NM_207046.2,NM_207043.1,NM_207045.2,NM_004436.4,NM_207044.1	GRCh38.p13	chr1:150627467-150627515
51372	NECTIN1_01	NECTIN1	NECTIN1	NM_203285.2,NM_002855.5,NM_203286.2	GRCh38.p13	chr11:119678708-119678746
43226	LAMP1_01	LAMP1	LAMP1	NM_005561.4,XM_011537494.2	GRCh38.p13	chr13:113310805-113310849
49842	EPN2_01	EPN2	EPN2	NM_148921.3,NM_014964.4,NM_001102664.1	GRCh38.p13	chr17:19336592-19336626
38388	TENT2_01	TENT2	TENT2	XM_011543227.2,XM_011543229.3,NM_001114393.3,XR_948240.3,XM_011543220.3,XM_017009156.2,XM_011543221.3,XM_011543232.2,XM_017009160.1,NM_001297745.3,XM_011543222.3,XM_017009155.2,XM_017009161.2,XM_017009151.2,XM_017009157.2,NM_001349548.2,NM_173797.5,NM_001114394.2,XM_017009152.2,NM_001297744.3,XR_001742029.2,XR_001742028.2,XM_011543223.2,NM_001349553.2,NM_001349552.2,XM_011543233.2,XR_001742030.1,…	GRCh38.p13	chr5:79668951-79668997
13620	VKORC1_01	VKORC1	VKORC1	NM_001311311.1,NM_024006.6,NM_206824.2	GRCh38.p13	chr16:31091185-31091223
51757	PLEKHA8_01	PLEKHA8	PLEKHA8P1,PLEKHA8	NR_037144.1,XM_017012744.1,XM_011515592.3,NM_001197026.2,XM_011515596.2,NM_001197027.1,NM_001350973.2,NM_032639.4,XM_017012747.1,XM_017012746.1,NM_001363474.1,XM_011515591.2,NM_001363473.1,NM_001350975.1,NM_001350974.2,XM_005249897.2	GRCh38.p13	chr12:45174556-45174605,chr7:30045153-30046210
45179	SPAST_01	SPAST	SPAST	NM_001363823.2,NM_199436.2,NM_014946.4,NM_001377959.1,XM_011533067.2,NM_001363875.2	GRCh38.p13	chr2:32089547-32089596
42777	MED26_01	MED26	MED26	NM_004831.5	GRCh38.p13	chr19:16575095-16575144
46725	HTR7_01	HTR7	HTR7	NM_000872.5,NM_019859.4,XM_024447973.1,NM_019860.4	GRCh38.p13	chr10:90749243-90749286
47726	PLA2G4A_01	PLA2G4A	PLA2G4A	XM_011509642.2,XM_005245267.4,NM_024420.3,NM_001311193.2	GRCh38.p13	chr1:186956324-186965437
42067	PRKRA_01	PRKRA	PRKRA	NM_001316362.2,NM_003690.5,XM_011512066.2,XM_011512063.2,NM_001139518.1,NM_001139517.1,XR_001739008.2,XM_017005159.1	GRCh38.p13	chr2:178443333-178443382
37688	SIDT2_01	SIDT2	SIDT2	NM_001040455.2	GRCh38.p13	chr11:117192276-117192325
44791	C11orf58_01	C11orf58	C11orf58	XM_017017143.2,NM_014267.6	GRCh38.p13	chr11:16754996-16755045
38151	SRL_01	SRL	SRL	XM_017023529.1,NM_001323667.1,NM_001323668.1,XM_017023527.1,NM_001098814.2,XM_017023528.1	GRCh38.p13	chr16:4192343-4192392
47534	FNDC3B_01	FNDC3B	FNDC3B	NM_001135095.2,XM_017007063.1,XM_017007062.1,XM_024453716.1,XM_024453717.1,XM_017007064.2,NM_022763.4	GRCh38.p13	chr3:172307493-172310861
40947	SLC31A1_01	SLC31A1	SLC31A1	NM_001859.4	GRCh38.p13	chr9:113260470-113260519
46231	MOCOS_01	MOCOS	MOCOS	NM_017947.4	GRCh38.p13	chr18:36256988-36257030
43259	DLL1_01	DLL1	DLL1	NM_005618.4,XM_005266934.4	GRCh38.p13	chr6:170282836-170282993
45171	DZIP1_01	DZIP1	DZIP1	NM_198968.4,NM_014934.5	GRCh38.p13	chr13:95580758-95580804
40042	CDC5L_01	CDC5L	CDC5L	NM_001253.4	GRCh38.p13	chr6:44422732-44422781
40916	CDK7_01	CDK7	CDK7	NM_001799.4,NM_001324078.2,XM_011543094.2,NM_001324072.1,NM_001324077.1,NR_136690.2,NM_001324071.2,NM_001324075.2,NM_001324070.2,NM_001324069.2,NM_001324074.2	GRCh38.p13	chr5:69269277-69272924
48062	TRABD_01	TRABD	TRABD	XM_017028943.1,NM_001320484.2,NM_001320485.2,XM_011530718.2,XR_938345.2,XM_011530712.2,NM_001320487.2,XM_011530713.3,XM_017028944.1,NR_135275.2,NM_025204.4,XR_938346.3,XM_006724423.3,XM_006724422.3,XM_011530716.2,NM_001378762.1,XR_001755302.1,XR_001755303.2,XR_002958713.1,XM_024452272.1,XM_011530715.2,NM_001320488.2,NM_001378765.1,XM_011530717.2	GRCh38.p13	chr22:50197912-50197952
43421	BCAS2_01	BCAS2	BCAS2	NM_005872.3	GRCh38.p13	chr1:114568217-114570001
52099	ZNF397_01	ZNF397	ZNF397	XM_006722558.2,XM_024451274.1,NM_032347.3,XM_024451273.1,XM_011526229.2,XM_024451275.1,XM_024451276.1,XM_017026042.1,XM_011526231.2,NM_001135178.3,XM_011526230.2	GRCh38.p13	chr18:35243226-35243260
35890	CTSK_01	CTSK	CTSK	NM_000396.4	GRCh38.p13	chr1:150805919-150805968
49993	ZNF569_01	ZNF569	ZNF569	XM_017026377.2,XM_017026380.1,XM_011526539.3,XM_006723048.4,XM_011526538.3,XM_017026379.1,NM_001330482.2,XM_017026382.2,XM_006723046.2,XM_006723047.4,NM_152484.3,XM_017026376.1	GRCh38.p13	chr19:37412474-37412523
49983	PROCA1_01	PROCA1	PROCA1	NM_001366303.1,NM_001304952.2,NM_001366302.1,XM_011524401.1,NM_001304953.2,NM_001304949.2,XM_011524399.2,NM_001366301.1,NM_152465.3,XM_011524398.2,NM_001304954.2,NM_001304951.2,XM_006721723.3	GRCh38.p13	chr17:28704193-28704323
48340	WDR87_01	WDR87	WDR87	NM_031951.5,NM_001291088.2,XM_011527360.2	GRCh38.p13	chr19:37885585-37885624
43278	TAF13_01	TAF13	TAF13	NM_005645.4	GRCh38.p13	chr1:109064647-109066137
39654	ALDH8A1_01	ALDH8A1	ALDH8A1	NM_022568.4,NM_001193480.2,NM_170771.3	GRCh38.p13	chr6:134917642-134917691
43406	CDK2AP2_01	CDK2AP2	CDK2AP2	NM_005851.5,NM_001271849.2,NR_073484.2	GRCh38.p13	chr11:67507427-67507476
49752	ADGRA3_01	ADGRA3	ADGRA3	XM_005248137.5,NM_145290.4,XR_001741153.1,XM_011513811.2	GRCh38.p13	chr4:22442696-22442745
47346	HAND2_01	HAND2	HAND2	NM_021973.3	GRCh38.p13	chr4:173526998-173527047
43173	GNE_01	GNE	GNE	NM_005476.7,NM_001374797.1,NM_001190383.3,NM_001190388.2,XM_005251334.4,XM_017014167.1,NM_001190384.3,NM_001374798.1,NM_001128227.3	GRCh38.p13	chr9:36234002-36234051
43427	DNAJA2_01	DNAJA2	DNAJA2	NM_005880.4	GRCh38.p13	chr16:46971385-46971432
40573	CTNND2_01	CTNND2	CTNND2	XM_017009075.2,NM_001364128.1,NM_001288715.1,XM_005248252.2,XM_011513967.2,XM_005248253.1,NM_001332.4,XM_017009072.1,XM_017009073.1,NR_109988.2,XM_005248251.3,NM_001288717.2,NM_001288716.1,XM_024454368.1,XM_017009074.1	GRCh38.p13	chr5:10973031-10973080
39488	KIF21A_01	KIF21A	KIF21A	NM_001378441.1,NM_001173464.2,NM_001378440.1,XM_005269011.3,NM_001378439.1,XM_017019608.2,XM_005269009.3,XM_006719494.3,XM_005269014.3,NM_017641.4,NM_001173463.2,XM_006719493.3,XM_005269013.3,XM_017019609.2,XM_005269012.3,XM_011538556.3,NM_001173465.2,XM_017019607.2,XM_017019610.2,XM_017019611.2	GRCh38.p13	chr12:39367893-39367942
44503	PTPN22_01	PTPN22	PTPN22	NM_001308297.1,XM_017001004.1,XM_011541222.1,NM_012411.5,NM_015967.7,XM_011541223.2,XM_017001006.1,NM_001193431.2,XM_011541225.2,XM_017001005.2,XM_011541221.1	GRCh38.p13	chr1:113858541-113859018
48233	HDHD3_01	HDHD3	HDHD3	NM_031219.4,NM_001304509.2,NM_001304511.2,NM_001304510.2,NM_001371923.1	GRCh38.p13	chr9:113374433-113374472
45695	ZNF589_01	ZNF589	ZNF589	NM_016089.3	GRCh38.p13	chr3:48268113-48268162
41925	ZFP36_01	ZFP36	ZFP36	NM_003407.5	GRCh38.p13	chr19:39409091-39409140
40577	CX3CR1_01	CX3CR1	CX3CR1	NM_001337.4,NM_001171172.1,NM_001171171.1,NM_001171174.1	GRCh38.p13	chr3:39265462-39265511
36863	TFG_01	TFG	TFG	NM_001195478.1,NM_006070.6,XM_005247066.2,XM_006713472.1,XM_017005527.1,XM_011512334.1,NM_001007565.2,NM_001195479.1	GRCh38.p13	chr3:100748280-100748329
40215	CLEC18A_01	CLEC18A	CLEC18A	NM_001271197.2	GRCh38.p13	chr16:69951036-69951070
43845	SCGB1D2_01	SCGB1D2	SCGB1D2	NM_006551.4	GRCh38.p13	chr11:62243320-62243372
43637	PITPNA_01	PITPNA	PITPNA	XM_011523939.1,NM_006224.4	GRCh38.p13	chr17:1519600-1519649
38998	CCDC153_01	CCDC153	CCDC153	NM_001145018.2	GRCh38.p13	chr11:119195464-119195801
44982	BRINP1_01	BRINP1	BRINP1	NM_014618.3	GRCh38.p13	chr9:119369072-119369121
43400	SPRY1_01	SPRY1	SPRY1	NM_001258038.2,NM_001375410.1,NM_001258039.1,NM_005841.3,NM_199327.3	GRCh38.p13	chr4:123402080-123402129
37306	YIPF5_01	YIPF5	YIPF5	NM_030799.9,NM_001024947.4,NM_001271732.2	GRCh38.p13	chr5:144165481-144165515
35463	PPP4R3B_01	PPP4R3B	PPP4R3B	XM_017004532.2,XM_017004537.2,XM_005264447.3,XM_005264446.3,XM_005264442.3,XM_017004538.2,XM_005264445.3,NM_020463.4,XM_024453014.1,XM_017004534.2,XM_017004539.2,XM_017004535.2,XR_001738855.2,XM_017004531.2,NM_001122964.3,XM_017004540.2,XM_005264444.3,XM_017004536.2,NM_001282850.2,XM_017004533.2	GRCh38.p13	chr2:55617245-55617279
41767	STXBP1_01	STXBP1	STXBP1	NM_001374314.1,NM_001032221.6,NM_001374311.2,NM_001374308.2,NM_001374307.2,NM_001374309.2,NM_001374310.2,NM_001374306.2,NM_001374313.2,NM_003165.6,NM_001374312.2,NM_001374315.2	GRCh38.p13	chr9:127660104-127661146
50659	SOWAHA_01	SOWAHA	SOWAHA	NM_175873.6	GRCh38.p13	chr5:132815381-132815420
51837	LNX2_01	LNX2	LNX2	XM_017020434.1,XM_011534995.2,NM_153371.4	GRCh38.p13	chr13:27546501-27546550
36081	AGTR1_01	AGTR1	AGTR1	NM_031850.3,NM_009585.4,NM_001382736.1,NM_001382737.1,NM_004835.4,NM_000685.5,NM_032049.3	GRCh38.p13	chr3:148742530-148742579
34871	KCNIP2_01	KCNIP2	KCNIP2	XM_017016161.1,NM_173191.3,NM_014591.5,NM_173194.3,XM_005269730.2,XM_011539731.2,XM_005269729.2,NM_173195.3,XM_006717812.2,NM_173193.3,NM_173192.2,NM_173197.2	GRCh38.p13	chr10:101829156-101829199
42219	SKAP2_01	SKAP2	SKAP2	XM_017012771.2,NM_003930.5,NM_001303468.1	GRCh38.p13	chr7:26670103-26670152
49013	EGLN2_01	EGLN2	EGLN2,RAB4B-EGLN2	NR_037791.1,NM_080732.4,NM_053046.4	GRCh38.p13	chr19:40807528-40807834
11752	CXCL1_01	CXCL1	CXCL1	NR_046035.2,NM_001511.4	GRCh38.p13	chr4:73869916-73869950
42767	SYMPK_01	SYMPK	SYMPK	XM_005259286.1,XR_243962.3,NM_004819.3,XM_011527354.1	GRCh38.p13	chr19:45848861-45852345
35915	MAT1A_01	MAT1A	MAT1A	NM_000429.3	GRCh38.p13	chr10:80272899-80272947
48261	GSDMC_01	GSDMC	GSDMC	XM_011517168.2,XM_011517158.2,XM_017013645.1,XR_928340.2,XM_011517162.2,XM_011517167.2,XM_011517163.3,XR_928341.2,XR_928339.2,NM_031415.3,XM_011517159.2,XM_011517161.2	GRCh38.p13	chr8:129776238-129777369,chr8:129776238-129777344
37562	TTPAL_01	TTPAL	TTPAL	XM_024452000.1,NM_001039199.3,NM_024331.5,XM_011529043.3,XM_017028063.2,XM_011529044.3,XM_011529045.3,NM_001261839.2	GRCh38.p13	chr20:44489988-44490037
50861	NLRC3_01	NLRC3	NLRC3	XM_017023037.2,XM_017023036.2,XM_017023033.2,XM_017023038.2,XM_017023034.2,XM_017023029.2,XM_017023030.2,XM_017023035.2,XM_017023028.2,XM_017023031.2,XM_017023027.2,NR_075083.3,NM_178844.4	GRCh38.p13	chr16:3541813-3541856
5313	MPO_01	MPO	MPO	NM_000250.2	GRCh38.p13	chr17:58273544-58273583
44020	ADIRF_01	ADIRF	ADIRF	NM_006829.3	GRCh38.p13	chr10:86970218-86970252
35940	BARD1_01	BARD1	BARD1	NM_001282548.2,NR_104215.2,NM_001282549.2,XR_002959322.1,NM_001282543.2,NM_000465.4,XM_017004613.1,NR_104212.2,NM_001282545.2,NR_104216.2	GRCh38.p13	chr2:214728840-214728889
35471	ZNRF3_01	ZNRF3	ZNRF3	XM_011530437.1,XM_017028990.1,XM_011530436.3,XM_011530438.2,NM_032173.3,XM_011530435.2,NM_001206998.2,XM_024452286.1	GRCh38.p13	chr22:29043376-29043410
39531	ATP8B3_01	ATP8B3	ATP8B3	XM_011527711.2,NM_001178002.3,XM_006722656.3,NR_047593.3,XM_011527709.2,XM_011527708.2,XR_936159.1,XM_006722654.3,XM_006722655.3,NM_138813.4,XM_011527707.2,XM_011527710.3	GRCh38.p13	chr19:1800424-1801979
51286	PRICKLE2_01	PRICKLE2	PRICKLE2	XM_011533432.2,XM_017005799.1,NM_198859.4,XM_011533438.2,XM_011533433.2,XM_011533434.2,XM_011533435.2,NM_001370528.1,XM_011533436.3,XM_011533440.2,XM_011533437.2	GRCh38.p13	chr3:64095892-64095941
42365	TANK_01	TANK	TANK	XM_017003093.1,NM_004180.3,XM_017003097.1,XM_017003096.1,XM_024452333.1,NM_133484.1,XM_024452335.1,XM_017003094.1,XM_017003095.1,XM_005246207.3,NM_001199135.3,XM_024452337.1	GRCh38.p13	chr2:161179665-161179714
35691	EPOR_01	EPOR	EPOR	NM_000121.4,NR_033663.2	GRCh38.p13	chr19:11378267-11378301
39510	CCK_01	CCK	CCK	NM_001174138.2,NM_000729.6	GRCh38.p13	chr3:42257860-42257909
46422	ECHDC2_01	ECHDC2	ECHDC2	XM_011541727.3,XM_024448160.1,XM_011541726.3,XR_002957011.1,NM_001319958.2,XM_024448158.1,XM_011541720.3,NM_001198962.1,XR_002957012.1,XM_024448159.1,XM_011541709.2,XM_011541722.2,NM_001198961.2,XM_011541715.3,XM_024448164.1,NM_018281.4,XR_002957014.1,XM_024448157.1,XM_011541719.2,XM_024448163.1,XM_017001638.1,XM_017001639.1,XM_024448161.1,XM_017001640.1,XM_011541713.3,XM_024448152.1,XM_024448153…	GRCh38.p13	chr1:52896302-52896351
41745	SPTA1_01	SPTA1	SPTA1	XR_921912.2,XR_921911.3,XM_011509918.3,XM_011509916.2,XM_011509919.3,XM_011509917.3,NM_003126.4	GRCh38.p13	chr1:158676267-158677710
41099	GYPB_01	GYPB	GYPA,GYPB,GYPE	NM_198682.3,XM_017008135.2,NM_002100.6,NM_001304382.1,XM_011531904.3,NM_001308187.2,XM_011531905.2,XM_017008137.1,XM_017008140.2,NM_002102.4,NM_002099.8,XM_011531903.2,XM_017008134.2,XM_017008139.2	GRCh38.p13	chr4:144120527-144120576,chr4:143880448-143880497,chr4:144001222-144001271
49130	CFAP36_01	CFAP36	CFAP36	XM_017003254.1,NM_001282761.1,NM_080667.7,XM_017003255.1,XM_011532499.1	GRCh38.p13	chr2:55537531-55537580
44259	ACOT7_01	ACOT7	ACOT7	NM_181865.3,NM_181866.3,NM_007274.4,NM_181864.3	GRCh38.p13	chr1:6264326-6264363
48493	NAA38_01	NAA38	NAA38	NM_001320925.2,NM_032356.5,NM_001330111.2,NM_001320924.2	GRCh38.p13	chr17:7856723-7856757
45436	AASDHPPT_01	AASDHPPT	AASDHPPT	NM_015423.3	GRCh38.p13	chr11:106094609-106096746
36353	MAP3K15_01	MAP3K15	MAP3K15	XM_011545508.3,XM_011545507.3,XM_011545511.2,NM_001001671.3,XM_011545510.2	GRCh38.p13	chrX:19395130-19395179
35108	NCKIPSD_01	NCKIPSD	NCKIPSD	XM_017006594.1,XM_017006595.1,NM_016453.4,XM_017006600.1,NM_184231.3,XM_017006596.1,XR_002959541.1,XM_017006597.1,XM_017006599.1,XM_017006598.1	GRCh38.p13	chr3:48679848-48679885
47401	TSPYL2_01	TSPYL2	TSPYL2	XM_017029726.2,XM_006724592.4,XR_001755719.2,NM_022117.4,XM_017029727.2	GRCh38.p13	chrX:53085312-53085670
49052	DUSP4_01	DUSP4	DUSP4	NM_057158.3,XM_011544428.3,NM_001394.7	GRCh38.p13	chr8:29336283-29336332
41803	TFF3_01	TFF3	TFF3	NM_003226.4
47970	RMI1_01	RMI1	RMI1	NM_001358291.2,NM_001358294.1,NM_024945.3,NM_001358292.2,XM_017015140.1,NM_001358293.2	GRCh38.p13	chr9:84001106-84001155
34529	CLCNKA_01	CLCNKA	CLCNKA	NM_001257139.2,NM_001042704.2,NM_004070.4	GRCh38.p13	chr1:16028054-16028096
49448	DIABLO_01	DIABLO	DIABLO	NM_001278302.1,NM_019887.6,NM_001371333.1,NM_001278342.1,NM_001278304.2,NM_138930.3,NM_001278303.1	GRCh38.p13	chr12:122208205-122208244
51234	ZNF710_01	ZNF710	ZNF710	XM_011521543.3,XM_011521542.3,XM_005254907.4,NM_198526.4,XM_011521541.3,XM_011521540.3,XM_011521544.1,XM_005254906.4	GRCh38.p13	chr15:90073235-90074132
37719	CENPA_01	CENPA	CENPA	NM_001042426.1,NM_001809.4	GRCh38.p13	chr2:26794267-26794316
43369	PRMT3_01	PRMT3	PRMT3	XM_024448312.1,XM_011519836.2,XR_001747718.2,NM_005788.4,NM_001145166.1,XM_017017081.1,XR_002957114.1,NM_001145167.1	GRCh38.p13	chr11:20402964-20407939
49826	WFDC9_01	WFDC9	WFDC9	NM_147198.4	GRCh38.p13	chr20:45610145-45610194
34788	SMDT1_01	SMDT1	SMDT1	NR_146717.1,NR_146715.1,NM_033318.5,XM_011530509.3	GRCh38.p13	chr22:42082002-42082051
38666	EIF4E3_01	EIF4E3	EIF4E3	NM_173359.5,NM_001282886.2,NM_001134650.1,NM_001134651.2,NM_001134649.2	GRCh38.p13	chr3:71680016-71680065
44511	SF3B3_01	SF3B3	SF3B3	NM_012426.5	GRCh38.p13	chr16:70528952-70529001
37021	CYP4A22_01	CYP4A22	CYP4A22,CYP4A11	NM_001308102.1,XM_005270767.3,NR_134992.2,XR_001737122.1,NR_134993.2,NM_001363587.2,XR_001737005.1,NR_134988.2,NR_134990.2,NR_134994.2,XM_005270539.1,NM_001010969.4,XM_005270770.3,NR_134989.2,NM_000778.4,XM_017000465.1,NM_001319155.2	GRCh38.p13	chr1:47140859-47140908,chr1:46938009-46938058
48212	ADAMTS10_01	ADAMTS10	ADAMTS10	XR_001753770.1,NM_001282352.1,NM_030957.4,XM_017027338.2,XM_017027339.1,XM_006722917.3,XM_017027340.1	GRCh38.p13	chr19:8586713-8586856
11684	COL17A1_01	COL17A1	COL17A1	NM_000494.4	GRCh38.p13	chr10:104080629-104080663
51037	BPIFB3_01	BPIFB3	BPIFB3	NM_182658.3,NM_001376932.1	GRCh38.p13	chr20:33071282-33072139
35524	SCAI_01	SCAI	SCAI	XR_929767.1,XR_929768.1,NM_173690.5,NM_001144877.3	GRCh38.p13	chr9:125003515-125003564
38108	TAS2R30_01	TAS2R30	TAS2R30	NM_001097643.1	GRCh38.p13	chr12:11133429-11133478
38635	INPP4A_01	INPP4A	INPP4A	XM_011511124.2,NM_001134225.2,XM_011511125.2,NM_001134224.1,XR_001738738.1,XM_006712508.3,XM_006712503.3,XM_011511122.2,XM_011511123.2,XM_017004003.1,NM_001351428.1,NM_001351426.1,NM_001351429.1,XM_006712505.3,NM_001351427.1,XM_006712504.3,XM_006712499.3,NM_001351424.1,XM_006712506.3,NM_001351425.2,XM_006712502.3,XR_922916.2,XR_922915.2,XM_006712501.3,XM_006712500.3,XM_017003994.1,XM_024452876.1,…	GRCh38.p13	chr2:98538929-98538978
51453	YY2_01	YY2	YY2	NM_206923.4	GRCh38.p13	chrX:21856643-21856689
34885	NR3C2_01	NR3C2	NR3C2	NM_001354819.1,XM_011531975.1,XM_011531978.2,NR_148974.2,NM_001166104.2,NM_000901.5	GRCh38.p13	chr4:148435885-148435927
47794	HECTD3_01	HECTD3	HECTD3	XM_024449803.1,NM_024602.6	GRCh38.p13	chr1:45008697-45009183
42856	KCNA2_01	KCNA2	KCNA2	XM_017001213.1,NM_001204269.2,XM_011541397.2,NM_004974.4,XM_011541400.2,XM_011541399.2,XM_011541398.2,XM_011541396.2	GRCh38.p13	chr1:110604334-110604378
39889	MAP2K5_01	MAP2K5	MAP2K5	XM_011521788.3,XM_011521787.3,NM_002757.4,NM_145160.3,XR_001751355.2,XM_024449988.1,XM_017022414.2,NM_001206804.2	GRCh38.p13	chr15:67563288-67563336
41905	VIP_01	VIP	VIP	XM_006715562.4,NM_194435.3,NM_003381.4,XM_005267135.3	GRCh38.p13	chr6:152755297-152755346
39154	RBM19_01	RBM19	RBM19	NM_016196.4,NM_001146699.2,XR_944848.2,NM_001146698.2,XM_017020280.1,XM_017020281.1,XR_001748932.1	GRCh38.p13	chr12:113920654-113924709
35423	TRIM13_01	TRIM13	TRIM13	NM_005798.5,NM_001007278.3,NM_213590.3,NM_052811.4	GRCh38.p13	chr13:50012332-50012368
36381	OR2G2_01	OR2G2	OR2G2	NM_001001915.1	GRCh38.p13	chr1:247588870-247588919
46378	KLHDC8A_01	KLHDC8A	KLHDC8A	NM_018203.3,NM_001271865.1,NM_001271863.1,NM_001271864.1,XM_024448121.1	GRCh38.p13	chr1:205337225-205337274
34439	OR4E1_01	OR4E1	OR4E1	NM_001317107.2
46896	FHL5_01	FHL5	FHL5	NM_001170807.2,NM_001322466.1,NM_020482.5,NM_001322467.1	GRCh38.p13	chr6:96610683-96610732
41657	CCL24_01	CCL24	CCL24	XM_011516460.2,NM_001371193.1,NM_002991.3	GRCh38.p13	chr7:75813379-75813647
37645	SPTSSB_01	SPTSSB	SPTSSB	NM_001320679.1,XM_017005793.2,XM_024453379.1,XM_024453380.1,XM_017005794.2,NM_001040100.1	GRCh38.p13	chr3:161345160-161345209
44371	FOXD3_01	FOXD3	FOXD3	NM_012183.3	GRCh38.p13	chr1:63324758-63324807
39338	NDUFS2_01	NDUFS2	NDUFS2	NM_001377302.1,XM_005245209.2,NM_004550.4,NM_001377299.1,NM_001377298.1,NM_001377301.1,NR_165188.1,NM_001166159.2,NM_001377300.1	GRCh38.p13	chr1:161209226-161209275
39585	ARHGDIA_01	ARHGDIA	ARHGDIA	NM_001301240.2,NM_004309.6,NM_001301243.2,XM_011523574.1,NM_001185078.3,NM_001185077.3,NR_125441.2,NM_001301241.2,NM_001301242.2	GRCh38.p13	chr17:81868076-81868125
48613	RBBP6_01	RBBP6	RBBP6	NM_032626.5,NM_006910.5,NM_018703.4	GRCh38.p13	chr16:24540651-24540700
12514	MED28_01	MED28	MED28	NM_025205.5	GRCh38.p13	chr4:17623625-17623659
36415	RPLP0_01	RPLP0	RPLP0	NM_053275.3,NM_001002.4	GRCh38.p13	chr12:120199381-120199416
46671	EML4_01	EML4	EML4	NM_019063.5,XM_006711992.2,XM_006711991.1,XR_001738710.1,XM_005264267.1,XM_005264268.3,XR_001738709.1,XR_001738708.1,NM_001145076.3	GRCh38.p13	chr2:42295482-42301255
37604	SNAPC3_01	SNAPC3	SNAPC3	XM_017015056.2,NR_161440.2,NR_161438.2,NR_161433.2,NR_161442.2,NR_161444.2,NM_001369648.2,NM_001369651.2,NM_001369647.2,NR_161434.2,NR_161439.2,NR_161450.2,NR_161445.1,NR_161435.2,NR_161446.2,NR_161447.2,NM_001039697.1,NM_001369650.2,NR_161448.2,NR_161441.1,NR_161449.2	GRCh38.p13	chr9:15447147-15447196
12860	PGAM4_01	PGAM4	PGAM4,PGAM1	NM_001029891.3,NM_002629.4	GRCh38.p13	chr10:97426308-97426342,chrX:77969604-77969638
35342	RNF14_01	RNF14	RNF14	NM_004290.5,NM_183399.2,NM_183400.2,XM_017010072.2,NM_183398.3,XM_005268543.5,XM_005268539.3,XM_005268540.4,XM_017010073.2,NM_001201365.1,XM_011537714.3,XM_005268541.4,NM_183401.3,XM_017010074.2,XM_017010071.2,XM_024446265.1,XM_005268542.3,XM_017010075.2	GRCh38.p13	chr5:141973648-141973689
35351	FHDC1_01	FHDC1	FHDC1	XM_011532389.1,XM_005263319.3,NM_001371116.1,NM_033393.3	GRCh38.p13	chr4:152943480-152943514
50247	TMEM139_01	TMEM139	TMEM139	NM_001282877.1,NR_104254.1,NR_040003.2,NR_104250.1,NR_104253.1,NM_001242774.2,NM_153345.3,NM_001242775.2,NR_104252.1,NR_104251.1,NM_001242773.2,NM_001282876.2	GRCh38.p13	chr7:143287151-143287200
48333	MIXL1_01	MIXL1	MIXL1	NM_031944.3,NM_001282402.2	GRCh38.p13	chr1:226225542-226225581
44896	GPR162_01	GPR162	GPR162	NM_019858.2,NM_014449.2	GRCh38.p13	chr12:6825604-6825638
45858	HIGD1B_01	HIGD1B	HIGD1B	XM_006721946.2,XM_017024743.1,XM_017024742.2,XM_006721948.3,NM_001271880.2,NR_073504.2,XM_006721947.4,XM_011524891.2,NM_016438.4	GRCh38.p13	chr17:44848174-44848211
44523	TNFRSF13B_01	TNFRSF13B	TNFRSF13B	NM_012452.3	GRCh38.p13	chr17:16952448-16952497
43655	PPP2R5E_01	PPP2R5E	PPP2R5E	NM_001282180.3,NR_104104.3,NM_001282181.2,NM_001282179.3,NM_006246.5,NM_001282182.3,XM_024449647.1	GRCh38.p13	chr14:63393869-63393918
45226	CLUAP1_01	CLUAP1	CLUAP1	NM_024793.2,NM_015041.3,XM_017023073.1,XR_002957794.1,XR_001751874.2,XM_006720867.3,NM_001330454.2	GRCh38.p13	chr16:3536557-3536606
39097	CT47B1_01	CT47B1	CT47B1	NM_001145718.1,XM_017029734.2	GRCh38.p13	chrX:120875294-120875339
36995	ACER2_01	ACER2	ACER2	XM_017014694.1,XM_005251448.3,XR_002956780.1,XR_002956781.1,XM_011517858.1,XM_011517859.2,XR_242507.3,NM_001010887.3,XR_242506.2	GRCh38.p13	chr9:19434982-19435031
50027	ZNF746_01	ZNF746	ZNF746	NM_152557.5,XM_005249955.2,NM_001163474.1,XM_005249957.1,XM_011515838.1,NM_001363517.2	GRCh38.p13	chr7:149473384-149473423
48410	USP42_01	USP42	USP42	XM_011515578.1,XM_024446969.1,XM_011515573.1,XM_024446968.1,XM_011515577.1,XM_006715791.2,NM_032172.3,XM_006715790.2,XM_011515574.1,XR_002956494.1,NM_001365764.1,XM_005249883.5	GRCh38.p13	chr7:6149794-6149843
34846	PCDH18_01	PCDH18	PCDH18	NM_019035.5,NM_001300828.2,XM_017008311.1,XM_006714239.3	GRCh38.p13	chr4:137531442-137531476
41721	SNAPC4_01	SNAPC4	SNAPC4	XM_006717241.3,XR_001746368.1,XM_017015058.2,XR_001746369.1,XM_005266096.3,NM_003086.3,XM_006717242.4	GRCh38.p13	chr9:136387570-136387771
36310	RPL39_01	RPL39	RPL39	NM_001000.4	GRCh38.p13	chrX:119786527-119786576
37290	LIN52_01	LIN52	LIN52	XM_011537322.2,NM_001024674.3,NM_001372006.1,XM_011537321.3,NM_001372005.1,XM_017021764.1	GRCh38.p13	chr14:74097838-74101172
12037	GCNT4_01	GCNT4	GCNT4	NM_001366737.1	GRCh38.p13	chr5:75029267-75029302
47881	MMRN2_01	MMRN2	MMRN2	NM_024756.3,XM_005270153.1,XM_006717970.4	GRCh38.p13	chr10:86936582-86936629
46901	NFKBIA_01	NFKBIA	NFKBIA	NM_020529.3	GRCh38.p13	chr14:35402031-35402398
48038	CFAP43_01	CFAP43	CFAP43	XM_017016684.1,XM_017016682.1,XM_005270171.2,XM_011540202.2,XM_024448177.1,NM_025145.7,XM_011540197.2,XR_002957015.1,XM_011540201.2,XM_005270172.3,XM_011540196.2,XM_011540200.2,XM_017016681.1,XM_011540199.2,XM_011540198.2,XM_024448178.1	GRCh38.p13	chr10:104187406-104187455
47467	RNF25_01	RNF25	RNF25	NM_022453.3,XM_017004695.2	GRCh38.p13	chr2:218668259-218668299
42190	GMPS_01	GMPS	GMPS	XM_011513263.2,XM_017007422.1,NM_003875.3	GRCh38.p13	chr3:155893591-155893640
47474	IKZF4_01	IKZF4	IKZF4	XM_017019814.1,XM_017019811.1,XM_017019810.1,XM_005269089.2,XM_005269086.3,XM_017019813.1,XM_017019812.1,XM_011538669.2,XM_024449128.1,XM_017019806.1,XM_017019807.1,NM_001351089.2,NM_022465.4,NM_001351092.2,XM_011538664.1,NM_001351091.2,XM_024449129.1,NM_001351090.1,XM_017019808.1,XM_024449131.1,XM_017019809.1,XM_024449130.1,XM_017019816.1,XM_017019815.1	GRCh38.p13	chr12:56037720-56037769
43254	PTK2_01	PTK2	PTK2	NR_148036.2,NR_148039.2,NM_001352739.2,XM_024447202.1,NM_001352714.2,XM_024447201.1,XM_017013669.2,XM_024447204.1,XM_024447203.1,NM_001199649.2,XM_024447209.1,XM_024447206.1,NM_001352718.2,NM_001352706.2,NM_001352729.2,XM_024447211.1,NM_001352704.2,NM_001352698.2,XM_017013654.2,XM_017013653.2,XM_017013656.2,XM_024447199.1,NM_001352711.2,NR_148038.2,XM_017013684.2,NM_001352738.2,NM_001352751.2,XM_…	GRCh38.p13	chr8:140659408-140659457
47840	NARS2_01	NARS2	NARS2	XM_017018304.2,XR_001747966.2,XM_017018303.1,XM_011545253.2,NM_024678.6,XR_001747965.2,NM_001243251.1,XR_001747964.2,XM_017018302.2,XR_001747963.2	GRCh38.p13	chr11:78566181-78566230
42524	EPHB2_01	EPHB2	EPHB2	XM_006710442.4,NM_001309193.2,NM_004442.7,NM_017449.5,NM_001309192.2,XM_024453895.1,XM_006710441.4	GRCh38.p13	chr1:22913827-22913876
36697	OR2B3_01	OR2B3	OR2B3	NM_001005226.2	GRCh38.p13	chr6:29086670-29086715
47750	GCC1_01	GCC1	GCC1	NM_024523.6	GRCh38.p13	chr7:127583280-127584170
38437	ZBTB1_01	ZBTB1	ZBTB1	XM_017021095.1,NM_014950.3,XM_011536568.2,XM_005267410.1,NM_001123329.1,XM_011536566.2	GRCh38.p13	chr14:64522796-64522845
44577	MAT2B_01	MAT2B	MAT2B	NM_182796.2,NM_013283.5	GRCh38.p13	chr5:163516544-163516593
39895	STRADB_01	STRADB	STRADB	NM_018571.6,XM_005246669.2,NM_001206864.2,XM_017004438.1	GRCh38.p13	chr2:201477766-201478111
39209	SCEL_01	SCEL	SCEL	XM_011535288.1,XM_011535290.1,NM_144777.3,XM_011535291.1,XM_011535287.1,XM_005266578.1,XM_006719884.1,XM_017020805.1,NM_003843.4,XM_011535282.1,NM_001160706.1,XM_011535281.1,XM_011535285.2,XM_006719885.1,XM_006719882.1,XM_011535289.1,XM_011535286.1,XM_011535284.1,XM_011535283.1	GRCh38.p13	chr13:77644549-77644598
51059	SNX20_01	SNX20	SNX20	NM_182854.4,NM_153337.3,NM_001144972.2	GRCh38.p13	chr16:50675817-50675857
49437	GALM_01	GALM	GALM	NM_138801.3,XR_244925.2,XM_011532540.2	GRCh38.p13	chr2:38675942-38675977
45758	MAN1B1_01	MAN1B1	MAN1B1	NR_045720.2,XR_001746176.1,NM_016219.5,XM_024447403.1,XM_006716945.4,NR_045721.2,XM_017014239.1	GRCh38.p13	chr9:137101519-137101568
39105	IRGM_01	IRGM	IRGM	NM_001145805.1,NM_001346557.2	GRCh38.p13	chr5:150848423-150848472
51382	INKA1_01	INKA1	INKA1	NM_203370.2,NM_001366281.1	GRCh38.p13	chr3:49804847-49804882
48355	STARD3NL_01	STARD3NL	STARD3NL	NM_032016.4,NM_001363340.2,XM_024446955.1,NM_001363344.2,NM_001363345.2,XM_011515572.1,XM_017012693.1,NM_001363346.2,NM_001363343.2,NM_001363339.2,NM_001363347.2	GRCh38.p13	chr7:38217277-38219582
34820	C16orf96_01	C16orf96	C16orf96	XM_005255301.3,XM_005255298.3,NM_001145011.1,XM_011522475.2	GRCh38.p13	chr16:4556499-4556533
43184	CST8_01	CST8	CST8	NM_005492.4,XR_937019.2,XR_937015.2,NM_001281730.2,XR_937018.2,XR_937016.2,XR_937017.2,XR_001754109.1	GRCh38.p13	chr20:23492972-23493021
49178	RLN3_01	RLN3	RLN3	NM_001311197.1,NM_080864.4	GRCh38.p13	chr19:14028284-14028328
46242	ZWILCH_01	ZWILCH	ZWILCH	NM_001287821.2,XR_001751344.2,XR_001751345.2,NM_001287822.1,NM_001287823.2,NM_017975.5	GRCh38.p13	chr15:66515640-66518923
49668	NXPE3_01	NXPE3	NXPE3	NM_001348992.2,NM_001348997.2,NM_001348993.2,NM_001348998.2,NM_001348994.2,NM_001348990.2,NM_001348995.2,NM_001348991.2,NM_001134456.2,NR_145993.2,NM_001348996.2,NM_145037.4	GRCh38.p13	chr3:101785660-101801254
44601	PAXBP1_01	PAXBP1	PAXBP1	XR_001754920.2,NR_027873.1,XR_001754921.2,XM_011529804.3,XR_001754919.2,NM_013329.4,XR_002958635.1,XR_001754922.2,XM_006724066.2,NM_016631.4	GRCh38.p13	chr21:32762251-32762299
47735	HIVEP3_01	HIVEP3	HIVEP3	XM_017001994.2,XM_017001993.2,XM_011541886.3,XR_001737357.2,XM_017001992.1,XM_011541887.3,NR_038261.2,NM_001127714.3,NM_024503.5,NR_038260.2,XM_011541884.2,XM_024448789.1,XM_011541885.3	GRCh38.p13	chr1:41918475-41918524
12231	HELZ2_01	HELZ2	HELZ2	XM_024452007.1,NM_001037335.2,XM_024452006.1,NM_033405.3	GRCh38.p13	chr20:63567099-63567133
37074	C1orf146_01	C1orf146	C1orf146	NM_001012425.2,XM_011541447.2	GRCh38.p13	chr1:92244338-92244380
13647	XBP1_01	XBP1	XBP1	NM_005080.3,NM_001079539.1	GRCh38.p13	chr22:28797124-28797161
41123	HNRNPA2B1_01	HNRNPA2B1	HNRNPA2B1	XR_001744672.2,XR_001744673.2,XR_001744665.1,XR_001744664.1,XR_001744668.2,XR_002956425.1,XR_002956424.1,XR_001744674.2,XR_001744675.1,XM_005249729.1,XR_001744669.2,XR_242077.2,XM_017012110.2,XR_001744663.1,XR_242076.1,XR_001744662.1,XM_017012109.2,NM_002137.4,XR_001744667.2,XR_428077.1,XR_001744666.2,XR_001744670.2,XR_001744671.2,NM_031243.3	GRCh38.p13	chr7:26197013-26197359
36715	OR10A7_01	OR10A7	OR10A7	NM_001005280.1	GRCh38.p13	chr12:55221511-55221560
51385	FBXL22_01	FBXL22	FBXL22	NM_001367807.1,NM_001367809.1,XM_011521472.3,NM_203373.3,NM_001367808.1,XM_011521468.3,XM_006720478.2,XM_011521469.2	GRCh38.p13	chr15:63597660-63597694
[truncated: 16,816 more rows]

## Sheet: mouse
Probe ID	ProbeDisplayName	TargetName	Symbol	Accessions	GenomeBuild	GenomicPosition
13781	0610009B22Rik_01	0610009B22Rik	0610009B22Rik	XM_006533917.4,XM_006533919.3,NM_025319.2,XM_006533918.3	GRCm38.p6	chr11:51685834-51685880
13783	0610010K14Rik_01	0610010K14Rik	0610010K14Rik	NM_001177607.1,NM_001177603.1,XM_030245456.1,XR_003949207.1,XR_003949208.1,NM_001177601.1,NM_145758.1,XM_017314213.2,NM_026757.2,NM_001177606.1	GRCm38.p6	chr11:70236169-70236209
13784	0610012G03Rik_01	0610012G03Rik	0610012G03Rik	NM_134107.1,NR_027897.1	GRCm38.p6	chr16:31947914-31947948
13785	0610030E20Rik_01	0610030E20Rik	0610030E20Rik	XM_006506534.4,NM_026696.1	GRCm38.p6	chr6:72347356-72347397
13786	0610040J01Rik_01	0610040J01Rik	0610040J01Rik	NM_029554.4,XM_011240792.3,XM_006504178.4	GRCm38.p6	chr5:63898014-63898048
13787	1110002E22Rik_01	1110002E22Rik	1110002E22Rik	NM_001370862.1,XM_030252339.1	GRCm38.p6	chr3:138065874-138065909
13788	1110004F10Rik_01	1110004F10Rik	1110004F10Rik	XM_030242811.1,NM_019772.2,XM_030242810.1	GRCm38.p6	chr7:116099484-116099523
13791	1110017D15Rik_01	1110017D15Rik	1110017D15Rik	XM_030253837.1,NR_045551.2,NM_001253780.1,NM_001253788.1,NM_028624.1,NM_001253777.1,NR_045549.2,XM_006538307.4,NM_001048005.1,XM_006538308.3,XR_003955030.1,XM_030253836.1,NM_001253778.1	GRCm38.p6	chr4:41505609-41505643
13792	1110025L11Rik_01	1110025L11Rik	Krtap6-1,Krtap6-5,1110025L11Rik,Gm10228,Gm10229	NM_001270487.1,NM_010672.3,NM_001276278.1,NM_130856.2,NM_001199334.2	GRCm38.p6	chr16:89047652-89047686,chr16:89031875-89031909,chr16:89041223-89041257,chr16:89063753-89063787,chr16:89015486-89015520
13793	1110032A03Rik_01	1110032A03Rik	1110032A03Rik	NM_001361107.1,XM_030244552.1,NM_001311073.2,NM_001361108.1,NM_023483.4,XM_006510578.4	GRCm38.p6	chr9:50763977-50764016
13794	1110032F04Rik_01	1110032F04Rik	1110032F04Rik	NM_001167996.1	GRCm38.p6	chr3:68869917-68869953
13795	1110038F14Rik_01	1110038F14Rik	1110038F14Rik	NM_001347540.1,XR_003951346.1,NM_054099.3	GRCm38.p6	chr15:76948730-76948764
13796	1110051M20Rik_01	1110051M20Rik	1110051M20Rik	NM_001311144.1,XM_011239456.2,NM_175123.5	GRCm38.p6	chr2:91383818-91383855
13797	1110059E24Rik_01	1110059E24Rik	1110059E24Rik	NM_025423.2	GRCm38.p6	chr19:21598809-21598855
13798	1110059G10Rik_01	1110059G10Rik	1110059G10Rik	NM_025419.4	GRCm38.p6	chr9:122949018-122949052
13799	1110065P20Rik_01	1110065P20Rik	1110065P20Rik	NM_001142727.1,XM_011240609.3,NM_001347196.1	GRCm38.p6	chr4:124850397-124850431
13800	1190007I07Rik_01	1190007I07Rik	1190007I07Rik,1810014B01Rik	NR_015572.2,NM_001135567.1,NM_001135568.1,NM_001135569.1	GRCm38.p6	chr10:82620130-82620164,chr10:86688587-86688621
13801	1300017J02Rik_01	1300017J02Rik	1300017J02Rik	NM_027918.2,XM_006511835.4	GRCm38.p6	chr9:103256574-103256609
13802	1500009C09Rik_01	1500009C09Rik	1500009C09Rik	NR_037698.1,NR_037697.1	GRCm38.p6	chr15:82260155-82260193
13803	1500009L16Rik_01	1500009L16Rik	1500009L16Rik	XM_011243558.3,NM_001145198.1,XM_006514060.4,XM_011243557.3	GRCm38.p6	chr10:83758134-83758168
33621	1500011B03Rik_01	1500011B03Rik	1500011B03Rik	NR_027817.1,NR_027818.1	GRCm38.p6	chr5:114813797-114813831
13805	1520401A03Rik_01	1520401A03Rik	1520401A03Rik	XM_017317751.1,XM_017317750.1,XM_017317748.1,XM_017317749.1,XM_017317757.1,XM_017317753.2,XM_017317746.1,XM_017317756.1,XR_876666.2,XM_017317752.1,XM_017317747.1,XM_017317758.1,XM_017317755.2,XR_001782162.1	GRCm38.p6	chr17:23717159-23717193
13806	1600012H06Rik_01	1600012H06Rik	1600012H06Rik	NM_001083881.1,NM_026451.2,NM_001083882.1,NM_001083880.1	GRCm38.p6	chr17:14943744-14943779
13807	1600014C10Rik_01	1600014C10Rik	1600014C10Rik	NM_001085385.1,NM_028166.3	GRCm38.p6	chr7:38194742-38194783
13808	1600014C23Rik_01	1600014C23Rik	1600014C23Rik	XM_006524968.3,NM_028164.1	GRCm38.p6	chr17:45733718-45733754
13809	1700001C19Rik_01	1700001C19Rik	1700001C19Rik	NM_029296.2,XM_030250126.1,NM_001347584.1,NM_001172091.1,XM_030250127.1	GRCm38.p6	chr17:47413703-47413740
13810	1700001K19Rik_01	1700001K19Rik	1700001K19Rik	XM_006516149.4,XM_006516147.3,XM_006516144.4,XM_030246851.1,XM_011244159.3,XM_030246852.1,XM_006516148.4,XM_030246854.1,NM_025488.2,XM_006516145.4	GRCm38.p6	chr12:110668875-110668917
13811	1700001L19Rik_01	1700001L19Rik	1700001L19Rik	NM_027035.1	GRCm38.p6	chr13:68597642-68597677
13812	1700001O22Rik_01	1700001O22Rik	1700001O22Rik	NR_028486.2,XM_011239200.2,XM_030252120.1,XM_011239196.3,XM_011239198.2,NR_028487.2,XM_011239197.3,XR_866021.2,XM_006498376.3,XM_011239195.3,NM_198000.3,XM_011239199.2,XM_011239201.3,XM_030252119.1,XM_006498375.3	GRCm38.p6	chr2:30800965-30800999
13813	1700001P01Rik_01	1700001P01Rik	1700001P01Rik	NM_028156.2	GRCm38.p6	chr11:97775739-97775773
13814	1700003E16Rik_01	1700003E16Rik	1700003E16Rik	NM_027948.1	GRCm38.p6	chr6:83161739-83161780
13815	1700003F12Rik_01	1700003F12Rik	1700003F12Rik	NM_029305.2,XM_017319305.2	GRCm38.p6	chr2:154549540-154549574
13816	1700003H04Rik_01	1700003H04Rik	1700003H04Rik	NR_160692.1,NM_001368235.1	GRCm38.p6	chr3:124578517-124578552
13817	1700006A11Rik_01	1700006A11Rik	1700006A11Rik	NM_001357195.1,NM_027939.2	GRCm38.p6	chr3:124413592-124413627
13818	1700007K13Rik_01	1700007K13Rik	1700007K13Rik	NM_027040.1	GRCm38.p6	chr2:28466068-28466102
13819	1700008O03Rik_01	1700008O03Rik	1700008O03Rik	XM_006541172.4,XM_011250900.3,NM_027049.1,XM_017312286.1,XM_011250899.3,XM_006541171.1,XM_030242968.1,XM_030242969.1	GRCm38.p6	chr7:44362701-44362735
13820	1700008P02Rik_01	1700008P02Rik	1700008P02Rik	NM_027048.1	GRCm38.p6	chr3:6620260-6620296
13821	1700009N14Rik_01	1700009N14Rik	1700009N14Rik	NM_001081095.1	GRCm38.p6	chr4:39451264-39451299
13822	1700010B08Rik_01	1700010B08Rik	1700010B08Rik	NM_029308.1	GRCm38.p6	chr2:173721832-173721869
13823	1700010I14Rik_01	1700010I14Rik	1700010I14Rik	XR_003952172.1,NM_001347544.1,XR_876377.2,NM_025851.3	GRCm38.p6	chr17:8992128-8992163
13824	1700011L22Rik_01	1700011L22Rik	1700011L22Rik	XM_011248492.2,NM_026315.1	GRCm38.p6	chr8:79248369-79248414
13825	1700012A03Rik_01	1700012A03Rik	1700012A03Rik	NM_029587.3	GRCm38.p6	chr6:32051638-32051687
13826	1700012B07Rik_01	1700012B07Rik	1700012B07Rik	NM_001162428.1,NM_027038.1,XM_006534114.3	GRCm38.p6	chr11:109797375-109797410
13827	1700012B09Rik_01	1700012B09Rik	1700012B09Rik	NM_029306.3,XR_379134.4	GRCm38.p6	chr9:14766917-14766961
13828	1700012P22Rik_01	1700012P22Rik	1700012P22Rik	NM_027056.1,XM_006539154.2	GRCm38.p6	chr4:144419775-144419814
13829	1700013D24Rik_01	1700013D24Rik	1700013D24Rik	NR_164180.1,XM_030255704.1	GRCm38.p6	chr6:124356944-124356993
13830	1700013F07Rik_01	1700013F07Rik	1700013F07Rik	NM_029314.1	GRCm38.p6	chr3:108543447-108543484
13831	1700013G24Rik_01	1700013G24Rik	1700013G24Rik	NM_027063.2	GRCm38.p6	chr4:137454565-137454600
13832	1700013H16Rik_01	1700013H16Rik	1700013H16Rik	NM_001200013.1,XM_006535361.3	GRCm38.p6	chrX:53747864-53747899
33623	1700014D04Rik_01	1700014D04Rik	1700014D04Rik	XM_017315672.2	GRCm38.p6	chr13:59740970-59741004
13835	1700015G11Rik_01	1700015G11Rik	1700015G11Rik	NM_001195601.1	GRCm38.p6	chr7:52014863-52014900
13836	1700016C15Rik_01	1700016C15Rik	1700016C15Rik	NM_027077.2,XM_006496976.4,XM_017322429.2,XM_006496978.4,XR_373615.4	GRCm38.p6	chr1:177740995-177741030
13837	1700016D06Rik_01	1700016D06Rik	1700016D06Rik	NM_024271.2	GRCm38.p6	chr8:11678578-11678612
13838	1700016H13Rik_01	1700016H13Rik	1700016H13Rik	XM_011249580.1,XM_011249581.1,XM_006535261.4,NM_028824.1,XM_017321121.1,XM_006535258.1,XM_006535260.1,XM_011249582.2,NM_001163550.1	GRCm38.p6	chr5:103649527-103649561
13839	1700016K19Rik_01	1700016K19Rik	1700016K19Rik	NM_198637.2,XM_006534355.2	GRCm38.p6	chr11:76003169-76003206
13840	1700017B05Rik_01	1700017B05Rik	1700017B05Rik	XM_006511516.3,NM_028820.2	GRCm38.p6	chr9:57258957-57258994
13841	1700017N19Rik_01	1700017N19Rik	1700017N19Rik	XM_006513955.3,XM_030245218.1,XM_017314058.2,XM_006513956.3,NM_001081246.1	GRCm38.p6	chr10:100595039-100595074
13842	1700018B08Rik_01	1700018B08Rik	1700018B08Rik	XM_011248541.2,XM_006531475.4,NM_001357260.1,XM_006531474.4,XM_030243835.1,XM_017313001.2,XM_011248543.2,XM_011248542.3,NM_001357259.1,NM_029597.2	GRCm38.p6	chr8:121531800-121531834
13843	1700018F24Rik_01	1700018F24Rik	1700018F24Rik,Gm4871	XM_017321091.2,NM_027069.3,NM_001101463.1	GRCm38.p6	chr5:145032216-145032250,chr5:145043494-145043528
13844	1700018G05Rik_01	1700018G05Rik	1700018G05Rik	NR_045422.1	GRCm38.p6	chrX:102928958-102928992
13845	1700019A02Rik_01	1700019A02Rik	1700019A02Rik	XR_865288.2,XM_006496253.3,NM_001368200.1,XR_373261.2,NM_027070.2,XM_006496255.3	GRCm38.p6	chr1:53181860-53181894
13846	1700019D03Rik_01	1700019D03Rik	1700019D03Rik	NM_001368276.1,NM_001368280.1,NM_001368281.1,NM_144953.3,NM_001368279.1,NM_001368278.1,NM_001368274.1,NM_001368277.1	GRCm38.p6	chr1:52925476-52925511
13847	1700019N19Rik_01	1700019N19Rik	1700019N19Rik	NM_001368689.1,NM_026208.2,NM_001368688.1	GRCm38.p6	chr19:58789216-58789251
13848	1700020A23Rik_01	1700020A23Rik	1700020A23Rik	NM_029375.1,NM_001163483.1	GRCm38.p6	chr2:130405967-130406008
31124	1700020L13Rik_01	1700020L13Rik	1700020L13Rik	NR_144498.1	GRCm38.p6	chr7:30289770-30289805
13850	1700020L24Rik_01	1700020L24Rik	1700020L24Rik	NM_025492.3	GRCm38.p6	chr11:83440333-83440367
13851	1700020N01Rik_01	1700020N01Rik	1700020N01Rik	NR_027968.1	GRCm38.p6	chr10:21593477-21593511
13852	1700020N15Rik_01	1700020N15Rik	Gm6812,1700020N15Rik	NM_029316.1,NM_001098842.2	GRCm38.p6	chrX:68892559-68892593,chrX:69945760-69945794
13853	1700021F07Rik_01	1700021F07Rik	1700021F07Rik	NM_028158.1	GRCm38.p6	chr2:173527887-173527921
13854	1700022I11Rik_01	1700022I11Rik	1700022I11Rik	NM_026088.3	GRCm38.p6	chr4:42971410-42971451
13855	1700024G13Rik_01	1700024G13Rik	1700024G13Rik	NM_001034037.1	GRCm38.p6	chr14:32377936-32377971
13856	1700024J04Rik_01	1700024J04Rik	1700024J04Rik	XM_011249336.2	GRCm38.p6	chr11:49589967-49590010
13857	1700025C18Rik_01	1700025C18Rik	1700025C18Rik	NR_033448.1	GRCm38.p6	chr2:165090355-165090404
13858	1700025G04Rik_01	1700025G04Rik	1700025G04Rik	XM_011248069.3,XM_030242805.1,NM_197990.3	GRCm38.p6	chr1:152006601-152006635
13859	1700028J19Rik_01	1700028J19Rik	1700028J19Rik	NR_029436.1	GRCm38.p6	chr7:44230601-44230640
13860	1700028K03Rik_01	1700028K03Rik	1700028K03Rik	NM_175241.2,NM_182745.3	GRCm38.p6	chr5:107543920-107543961
13861	1700028P14Rik_01	1700028P14Rik	1700028P14Rik	NM_026188.2	GRCm38.p6	chr19:23652678-23652719
13862	1700029F12Rik_01	1700029F12Rik	1700029F12Rik	XM_011244689.3,NR_104276.1,NM_001284205.1,NM_001080777.2,NM_025585.3	GRCm38.p6	chr13:97030317-97030351
13863	1700029H14Rik_01	1700029H14Rik	1700029H14Rik	XM_030243716.1,NM_025601.3,NM_001080781.2,XM_030243717.1	GRCm38.p6	chr8:13558761-13558795
13864	1700029I15Rik_01	1700029I15Rik	1700029I15Rik	NM_183112.3	GRCm38.p6	chr2:92383525-92383559
13865	1700029J07Rik_01	1700029J07Rik	1700029J07Rik	NM_001359113.1,XR_378912.4,XR_003947334.1,NM_001033148.3	GRCm38.p6	chr8:45962382-45962419
13867	1700030J22Rik_01	1700030J22Rik	1700030J22Rik	NM_027103.3,NM_001357255.1,NM_001357253.1,NM_001357254.1	GRCm38.p6	chr8:116973567-116973602
13868	1700030K09Rik_01	1700030K09Rik	1700030K09Rik	XM_006509750.3,XM_011242328.3,XR_870463.2,NM_028170.2	GRCm38.p6	chr8:72444759-72444804
13869	1700031F05Rik_01	1700031F05Rik	1700031F05Rik	NM_028496.1,XM_006528312.3	GRCm38.p6	chrX:102861149-102861183
13870	1700034E13Rik_01	1700034E13Rik	1700034E13Rik	NM_030097.1	GRCm38.p6	chr18:52663567-52663610
13871	1700034I23Rik_01	1700034I23Rik	1700034I23Rik	NR_045380.1	GRCm38.p6	chr3:40900520-40900557
13872	1700034J05Rik_01	1700034J05Rik	1700034J05Rik	XM_017321776.2,XM_017321773.2,XM_017321777.2,NM_001164236.1,XM_017321774.2,XM_011241632.3,XM_006507112.4,XM_017321775.2,XM_030255626.1,NM_028509.1	GRCm38.p6	chr6:146953457-146953496
13873	1700037C18Rik_01	1700037C18Rik	1700037C18Rik	NM_028484.2	GRCm38.p6	chr16:3906163-3906197
13874	1700037H04Rik_01	1700037H04Rik	1700037H04Rik	NR_154887.1,XM_011239745.2,NM_001311138.1,NR_154886.1,NM_001361375.1,NM_026091.3,XM_030251987.1	GRCm38.p6	chr2:131151724-131153595,chr2:131151724-131151758
33626	1700049E17Rik1_01	1700049E17Rik1	Gm9732,1700049E17Rik2,1700049E17Rik1	NM_001358037.1,NR_154584.1,NM_001358038.1	GRCm38.p6	chr14:43305696-43305737,chr14:41932729-41932770,chr14:41580997-41581038
13877	1700056E22Rik_01	1700056E22Rik	1700056E22Rik	NM_028516.1	GRCm38.p6	chr1:184033213-184033247
13878	1700057G04Rik_01	1700057G04Rik	1700057G04Rik	XM_011242838.2,XM_011242837.2,XM_011242839.1,XR_001779073.1,NM_001033184.3	GRCm38.p6	chr9:92354643-92354686
13879	1700066B19Rik_01	1700066B19Rik	1700066B19Rik	NM_001033168.2,XM_006526290.4	GRCm38.p6	chr18:35728590-35728630
13880	1700066M21Rik_01	1700066M21Rik	1700066M21Rik	XR_373264.4,NM_028546.1,XM_030243183.1	GRCm38.p6	chr1:57377713-57377747
13881	1700067K01Rik_01	1700067K01Rik	1700067K01Rik	XM_006531403.3,NM_183097.3	GRCm38.p6	chr8:84003345-84003379
13882	1700067P10Rik_01	1700067P10Rik	1700067P10Rik	NR_160405.1	GRCm38.p6	chr17:48089653-48089691
13883	1700069L16Rik_01	1700069L16Rik	1700069L16Rik	NR_033216.1	GRCm38.p6	chr5:113692641-113692676
13886	1700084M14Rik_01	1700084M14Rik	1700084M14Rik	NR_126536.1	GRCm38.p6	chrX:91575247-91575296
13887	1700086L19Rik_01	1700086L19Rik	1700086L19Rik	NR_030733.1,NR_030734.1,NR_030735.1	GRCm38.p6	chr12:74284388-74284422
13888	1700088E04Rik_01	1700088E04Rik	1700088E04Rik	NM_001310576.1,NM_138581.2,NM_001310579.1,NM_001310581.1	GRCm38.p6	chr15:79135731-79135765
13889	1700092M07Rik_01	1700092M07Rik	1700092M07Rik	NM_001177347.1	GRCm38.p6	chr19:8740976-8741010
13890	1700093K21Rik_01	1700093K21Rik	1700093K21Rik	NM_001110133.2,NM_001370913.1,NM_026105.4,XM_006514790.3,XM_006514789.3	GRCm38.p6	chr11:23516473-23516508
13891	1700094D03Rik_01	1700094D03Rik	1700094D03Rik	NM_028567.2	GRCm38.p6	chr3:90064460-90064495
13892	1700102P08Rik_01	1700102P08Rik	1700102P08Rik	XM_006511628.2,NM_053216.2,XM_011242852.3	GRCm38.p6	chr9:108393280-108393315
13893	1700109H08Rik_01	1700109H08Rik	1700109H08Rik	NM_029843.3	GRCm38.p6	chr5:3575632-3575681
13894	1700113H08Rik_01	1700113H08Rik	1700113H08Rik	NM_029685.1	GRCm38.p6	chr10:87225915-87225962
13895	1700122O11Rik_01	1700122O11Rik	1700122O11Rik	NM_029689.1	GRCm38.p6	chr17:48036964-48036999
13896	1700123K08Rik_01	1700123K08Rik	1700123K08Rik	XM_011240959.3,XM_017321155.2,XM_011240960.2,NM_029693.2	GRCm38.p6	chr5:138564582-138564616
13897	1700123L14Rik_01	1700123L14Rik	1700123L14Rik	NR_003643.1	GRCm38.p6	chr6:96165308-96165342
13898	1700123O20Rik_01	1700123O20Rik	1700123O20Rik	NM_021437.2	GRCm38.p6	chr14:54690084-54690133
13899	1700125H20Rik_01	1700125H20Rik	1700125H20Rik	XM_006534339.4,XM_011249281.3,XM_006534340.4,XM_030246375.1,XM_006534341.4,XM_006534344.4,NM_028589.1,XM_006534342.4,XM_030246376.1	GRCm38.p6	chr11:85178343-85178377
13900	1700129C05Rik_01	1700129C05Rik	1700129C05Rik	XR_001781154.2,NM_001374759.1,XR_001781153.2,XM_017316174.2,XM_006519482.4,XM_006519481.4,XM_030247982.1,NM_026461.2	GRCm38.p6	chr14:59142713-59142753
13901	1810009A15Rik_01	1810009A15Rik	1810009A15Rik	NM_025463.3,NR_104416.1	GRCm38.p6	chr19:8888930-8888964
13902	1810009J06Rik_01	1810009J06Rik	1810009J06Rik,Gm2663	NM_001102660.1,NM_023707.3	GRCm38.p6	chr6:40995946-40995987,chr6:40968273-40968314
13903	1810009N02Rik_01	1810009N02Rik	1810009N02Rik	NM_026939.1
13904	1810010H24Rik_01	1810010H24Rik	1810010H24Rik	NM_001372503.1,XM_030246272.1,XM_017314738.2,XM_017314735.2,XM_030246270.1,XM_017314739.2,XM_030246271.1,NM_001372504.1,XM_017314740.2,XM_030246269.1,NM_001163473.2,NM_001372502.1,XM_017314737.2	GRCm38.p6	chr11:107028367-107028401
13905	1810013L24Rik_01	1810013L24Rik	1810013L24Rik	NM_001081400.3	GRCm38.p6	chr16:8843090-8843127
13906	1810024B03Rik_01	1810024B03Rik	1810024B03Rik	NM_198630.2,XM_006499778.3,XM_006499777.3	GRCm38.p6	chr2:127186883-127186918
13907	1810030O07Rik_01	1810030O07Rik	1810030O07Rik	XM_011247495.3,NM_175141.6,XM_006527698.4	GRCm38.p6	chrX:12673420-12673454
13908	1810037I17Rik_01	1810037I17Rik	1810037I17Rik	NM_024461.2	GRCm38.p6	chr3:122924517-122924551
13909	1810046K07Rik_01	1810046K07Rik	1810046K07Rik	NM_001372554.1,XM_006510587.1,NM_027217.2,NM_001372556.1,NM_001372555.1	GRCm38.p6	chr9:51318323-51318357
13910	1810055G02Rik_01	1810055G02Rik	1810055G02Rik	NM_001358257.1,NM_028077.3,NM_001358258.1,NM_001358256.1	GRCm38.p6	chr19:3716924-3716959
13911	1810062G17Rik_01	1810062G17Rik	1810062G17Rik	NM_028183.1	GRCm38.p6	chr3:36476138-36476176
13912	1810065E05Rik_01	1810065E05Rik	1810065E05Rik	NM_027239.2	GRCm38.p6	chr11:58423838-58423875
13913	2010003K11Rik_01	2010003K11Rik	2010003K11Rik	NM_027237.2	GRCm38.p6	chr19:4498482-4498516
13914	2010106E10Rik_01	2010106E10Rik	2010106E10Rik	NM_001168590.1,NM_026333.4	GRCm38.p6	chrX:112512470-112512509
13915	2010109A12Rik_01	2010109A12Rik	2010109A12Rik	NM_029363.1	GRCm38.p6	chr5:93213285-93213334
13917	2200002D01Rik_01	2200002D01Rik	2200002D01Rik	NM_028179.1	GRCm38.p6	chr7:29247931-29247965
13918	2200002J24Rik_01	2200002J24Rik	2200002J24Rik	XM_017312281.1,XM_017312283.1,XM_017312282.1,NM_026961.2	GRCm38.p6	chr7:30699796-30699830
13919	2210010C04Rik_01	2210010C04Rik	2210010C04Rik	NM_023333.4	GRCm38.p6	chr6:41033006-41033040
13920	2210016F16Rik_01	2210016F16Rik	2210016F16Rik	NM_027335.1	GRCm38.p6	chr13:58382561-58382602
13921	2210016L21Rik_01	2210016L21Rik	2210016L21Rik	NM_028211.1,XM_017321112.2	GRCm38.p6	chr5:114946040-114946074
13923	2210408I21Rik_01	2210408I21Rik	2210408I21Rik	XM_017315609.1,XM_006517397.4,NM_001081353.1,NM_001145676.1	GRCm38.p6	chr13:77183608-77183657
13924	2210418O10Rik_01	2210418O10Rik	Gm14288,2210418O10Rik,Gm14387,Zfp968,Gm4631,Gm14410,Gm14413,Gm14434,Zfp965,Gm14432,Zfp967,Zfp966,Gm16357,Gm4724,Gm2026,Gm2004,Gm2007,Gm14440,Gm14444,Gm14409,Gm11009,Zfp931,Gm14430,Zfp973,Zfp970,Zfp971,Gm14296,Gm14295,Gm14393,Gm6710,Gm14391,Gm14308,Gm14408,Gm14326,Gm14325,Gm14305,Gm14322	XM_011239955.3,NM_001199308.1,NM_001099308.2,XM_030246311.1,NM_001099327.1,NM_001256480.1,NR_130971.1,NM_001305137.1,NM_001242944.1,XM_030251808.1,XR_003954123.1,XM_011239954.3,NM_001177568.1,NM_001374746.1,XM_030252314.1,XR_003954125.1,NM_001177480.1,XM_030246307.1,XM_030252320.1,XM_017319407.2,XM_030246019.1,XR_390300.4,XR_390305.3,XM_017314489.2,XM_030245870.1,XR_003954127.1,XM_030251939.1,XM_…	GRCm38.p6	chr2:177948196-177948451,chr2:178069581-178069837,chr2:175327232-175327486,chr2:176719069-176719323,chr2:175922748-175923003,chr2:175016750-175016991,chr2:175132955-175133210,chr2:175197571-175197821,chr2:177266776-177267017,chr2:176235431-176235685,chr2:175380559-175380814,chr2:176319140-176319382,chr2:175878341-175878591,chr2:177195462-177195716,chr2:176678648-176678903,chr2:175038231-175086873…
13925	2300002M23Rik_01	2300002M23Rik	2300002M23Rik	NM_175148.3	GRCm38.p6	chr17:35567958-35567999
13926	2300009A05Rik_01	2300009A05Rik	2300009A05Rik	NM_027090.1	GRCm38.p6	chr9:63399043-63399077
13927	2310002L09Rik_01	2310002L09Rik	2310002L09Rik	NM_027981.1,XR_390343.2,NM_027104.3	GRCm38.p6	chr4:73950649-73950688
13928	2310009B15Rik_01	2310009B15Rik	2310009B15Rik	NM_001081226.1	GRCm38.p6	chr1:138856603-138856637
13929	2310011J03Rik_01	2310011J03Rik	2310011J03Rik	NM_025521.3	GRCm38.p6	chr10:80320275-80320309
13930	2310022A10Rik_01	2310022A10Rik	2310022A10Rik	NM_001374792.1,NM_001122767.1,XR_391092.3,XM_006540290.4,XM_017312231.2,NM_175107.5	GRCm38.p6	chr7:27571566-27571601
13931	2310022B05Rik_01	2310022B05Rik	2310022B05Rik	NM_175149.4	GRCm38.p6	chr8:124663075-124663109
13932	2310030G06Rik_01	2310030G06Rik	2310030G06Rik	NM_025865.3	GRCm38.p6	chr9:50740632-50740669
13933	2310033P09Rik_01	2310033P09Rik	2310033P09Rik	NM_024210.2	GRCm38.p6	chr11:59210227-59210261
13934	2310034C09Rik_01	2310034C09Rik	2310034C09Rik	NM_054100.3	GRCm38.p6	chr16:88759362-88759396
13935	2310034G01Rik_01	2310034G01Rik	2310034G01Rik	NR_040418.1	GRCm38.p6	chr19:46348401-46348435
13936	2310034P14Rik_01	2310034P14Rik	2310034P14Rik	XM_006508373.4	GRCm38.p6	chr7:83884284-83884321
13937	2310039H08Rik_01	2310039H08Rik	2310039H08Rik	NM_025966.3	GRCm38.p6	chr17:46772819-46772853
13938	2310050C09Rik_01	2310050C09Rik	2310050C09Rik	NM_025621.2	GRCm38.p6	chr3:92869194-92869229
13939	2310057J18Rik_01	2310057J18Rik	2310057J18Rik	NM_026336.3	GRCm38.p6	chr10:28981524-28981559
13940	2310057M21Rik_01	2310057M21Rik	2310057M21Rik	NR_152380.1,XM_011241888.3,NM_026655.4,XM_030242951.1	GRCm38.p6	chr7:131350844-131350879
13941	2310057N15Rik_01	2310057N15Rik	2310057N15Rik	NM_027170.2	GRCm38.p6	chr16:88773555-88773604
13942	2310061I04Rik_01	2310061I04Rik	2310061I04Rik	XM_006524875.3,NM_001033630.1,XM_006524877.1	GRCm38.p6	chr17:35895963-35896010
13943	2310061N02Rik_01	2310061N02Rik	2310061N02Rik	NM_027155.1	GRCm38.p6	chr16:88707853-88707888
13944	2310079G19Rik_01	2310079G19Rik	2310079G19Rik	NM_027173.1	GRCm38.p6	chr16:88627513-88627558
13945	2410002F23Rik_01	2410002F23Rik	2410002F23Rik	XM_030242908.1,XM_017312237.1,XM_030242909.1,XM_011250894.3,XM_006541091.2,XM_030242906.1,XM_006541090.3,XM_006541095.3,XM_006541097.4,XM_006541094.2,XM_006541093.3,NM_025880.4,XM_030242905.1,XM_030242907.1,XM_011250893.3	GRCm38.p6	chr7:44250860-44250895
13946	2410004B18Rik_01	2410004B18Rik	2410004B18Rik	NR_151446.1,NM_025555.5,NM_001356284.1,NR_151445.1	GRCm38.p6	chr3:145938067-145938101
13947	2410004P03Rik_01	2410004P03Rik	2410004P03Rik	NM_001201333.1,XM_006515231.4,NM_001201332.1	GRCm38.p6	chr12:17007182-17007216
13949	2410137M14Rik_01	2410137M14Rik	2410137M14Rik	NM_029747.3	GRCm38.p6	chr17:36978836-36978870
13951	2510002D24Rik_01	2510002D24Rik	2510002D24Rik	NM_001033164.2	GRCm38.p6	chr16:18836706-18836740
13952	2510009E07Rik_01	2510009E07Rik	2510009E07Rik	NM_001001881.2	GRCm38.p6	chr16:21653654-21653692
13953	2510039O18Rik_01	2510039O18Rik	2510039O18Rik	NM_029841.3,XM_006539279.4	GRCm38.p6	chr4:147941795-147941829
13954	2610001J05Rik_01	2610001J05Rik	2610001J05Rik	NM_001352887.1	GRCm38.p6	chr6:13870592-13870635
13955	2610002M06Rik_01	2610002M06Rik	2610002M06Rik	NM_025921.3	GRCm38.p6	chrX:107793541-107793575
13956	2610008E11Rik_01	2610008E11Rik	2610008E11Rik	XM_017314115.1,NM_001359715.1,NM_001359717.1,NM_001004362.2	GRCm38.p6	chr10:79067936-79067985
13957	2610028H24Rik_01	2610028H24Rik	2610028H24Rik	XM_006514295.4,XM_006514297.4,XM_011243600.3,NM_029816.2,XM_006514298.2	GRCm38.p6	chr10:76454743-76454777
13958	2610301B20Rik_01	2610301B20Rik	2610301B20Rik	NM_026005.3,XM_006538200.4	GRCm38.p6	chr4:10898012-10898047
13959	2610318N02Rik_01	2610318N02Rik	2610318N02Rik	XM_006522537.2,XM_006522540.1,XM_006522539.4,NM_183287.3,XM_030249273.1,NM_001358255.1,XM_006522541.4	GRCm38.p6	chr16:17118435-17118478
13960	2610507B11Rik_01	2610507B11Rik	2610507B11Rik	XR_001780057.2,NM_001002004.2,XR_001780058.2,XM_030246365.1,XM_006534312.2,XM_006534313.3	GRCm38.p6	chr11:78262739-78262774
13961	2610524H06Rik_01	2610524H06Rik	2610524H06Rik	NM_181075.3	GRCm38.p6	chr5:114823323-114823357
13962	2610528A11Rik_01	2610528A11Rik	2610528A11Rik	NM_001206684.1	GRCm38.p6	chr14:37107418-37107452
13963	2610528J11Rik_01	2610528J11Rik	2610528J11Rik	XM_006503272.3,NM_025572.2	GRCm38.p6	chr4:118529533-118529567
13964	2700049A03Rik_01	2700049A03Rik	2700049A03Rik	XR_001780505.2,NM_001163378.1,XM_006516366.4,XM_030246978.1,NM_029818.1,XM_006516364.3,XM_006516365.4	GRCm38.p6	chr12:71137972-71138009
13965	2700062C07Rik_01	2700062C07Rik	2700062C07Rik	NM_026529.4	GRCm38.p6	chr18:24475671-24475708
13967	2700097O09Rik_01	2700097O09Rik	2700097O09Rik	XM_011244186.3,XM_006516271.4,NR_155260.1,NR_030764.1,NM_028314.2	GRCm38.p6	chr12:55053364-55053399
13968	2810004N23Rik_01	2810004N23Rik	2810004N23Rik	NM_025615.2	GRCm38.p6	chr8:124861225-124861259
13970	2810021J22Rik_01	2810021J22Rik	2810021J22Rik	XM_030246294.1,XM_030246293.1,NM_172403.2,XM_030246292.1	GRCm38.p6	chr11:58880192-58880229
13971	2810408A11Rik_01	2810408A11Rik	2810408A11Rik	NM_001363161.1,NM_001316696.2,NM_001316697.2,NM_027419.4,XM_006534174.2,XM_011249246.3,XR_003949504.1,XM_006534171.4,XR_388526.4,NM_001316698.2	GRCm38.p6	chr11:69900637-69900671
13972	2810459M11Rik_01	2810459M11Rik	2810459M11Rik	NM_001144993.1,NM_001144992.1	GRCm38.p6	chr1:86046007-86046041
13973	2900026A02Rik_01	2900026A02Rik	2900026A02Rik	NM_001375886.1,NM_001347397.1,XM_017320881.2,NM_172884.3,XM_006534936.3,XM_030254503.1	GRCm38.p6	chr5:113097746-113097781
13974	2900092C05Rik_01	2900092C05Rik	2900092C05Rik	XM_017312332.2,NM_028434.3	GRCm38.p6	chr7:12512843-12512878
13975	3110009E18Rik_01	3110009E18Rik	3110009E18Rik	XM_030243151.1,XM_017312451.2,XM_006529893.3,NM_001172074.1,XM_017312453.2,XM_017312452.2,NM_028439.2	GRCm38.p6	chr1:120150667-120150716
13976	3110040M04Rik_01	3110040M04Rik	3110040M04Rik	NM_001372355.1,XM_993996.6	GRCm38.p6	chr1:151204183-151204217
13977	3110040N11Rik_01	3110040N11Rik	3110040N11Rik	NM_026077.4,XM_011250897.3,NM_001370770.1,XM_011250896.3	GRCm38.p6	chr7:81788469-81788514
13978	3110067G11Rik_01	3110067G11Rik	3110067G11Rik	XM_017319868.2	GRCm38.p6	chr3:152486089-152486123
13979	3110082I17Rik_01	3110082I17Rik	3110082I17Rik	NM_028469.3,XM_006504738.4	GRCm38.p6	chr5:139360695-139360730
13980	3110082J24Rik_01	3110082J24Rik	3110082J24Rik	NM_001256263.1	GRCm38.p6	chr5:30105287-30105321
33628	3300002I08Rik_01	3300002I08Rik	3300002I08Rik	XM_011239763.3,XM_006500134.4,NM_027017.1	GRCm38.p6	chr2:150311184-150311218
13982	3425401B19Rik_01	3425401B19Rik	3425401B19Rik	XM_006518319.4,XM_006518316.4,XM_006518318.3,XM_006518317.3,NM_001195097.1,XM_006518314.4,XM_006518315.4	GRCm38.p6	chr14:32663526-32663561
13983	3830406C13Rik_01	3830406C13Rik	3830406C13Rik	XM_006517993.3,XM_006517992.2,XM_030247731.1,NM_001284386.1,XM_006517991.4,NM_001284387.1,XM_006517995.3,XM_006517994.3,XM_006517990.4,NM_001284384.1,NM_001284385.1,XM_006517997.2,XM_030247732.1,XR_874030.2,XM_030247733.1,NM_001284383.1,XM_030247734.1,XM_030247735.1,XM_006517987.4,XM_006517988.4,NM_146051.3,XM_006517989.4,XR_001781107.2,NM_178141.3	GRCm38.p6	chr14:12297595-12297630
13986	4833420G17Rik_01	4833420G17Rik	4833420G17Rik	XM_030247383.1,XM_030247381.1,XM_030247382.1,NM_001113550.1,NM_001360805.1,XM_006517747.1,XM_006517744.1,XM_006517748.1,XM_030247384.1,XR_001780802.2,XM_006517749.1,NM_026127.4,XR_003950471.1,XM_006517743.1,XR_003950470.1,NR_153825.1,XM_006517750.1,XR_873788.3	GRCm38.p6	chr13:119466867-119466910
13988	4833439L19Rik_01	4833439L19Rik	4833439L19Rik	XM_006517478.4,NM_001252648.1,NM_001252646.1,NM_001252647.1,XM_006517479.4,NM_133797.4,NM_001252645.1	GRCm38.p6	chr13:54552984-54553018
13989	4921504E06Rik_01	4921504E06Rik	4921504E06Rik	NM_027600.4	GRCm38.p6	chr2:19494121-19494170
13990	4921507P07Rik_01	4921507P07Rik	4921507P07Rik	XM_030255593.1,NM_027564.3,XM_006506605.1,XM_006506606.4	GRCm38.p6	chr6:50584438-50584487
13991	4921511C20Rik_01	4921511C20Rik	4921511C20Rik	NR_003646.1	GRCm38.p6	chrX:127395536-127395581
13992	4921517D22Rik_01	4921517D22Rik	4921517D22Rik	XM_006517375.2,NM_183290.2	GRCm38.p6	chr13:59690590-59690639
13993	4921524J17Rik_01	4921524J17Rik	4921524J17Rik	NR_033144.1,NM_025722.3	GRCm38.p6	chr8:85412237-85412271
13994	4921524L21Rik_01	4921524L21Rik	4921524L21Rik	XM_006526244.2,NM_027598.2,XM_011247003.2,XM_011247002.2,NM_001362874.1,XM_006526245.3	GRCm38.p6	chr18:6638703-6638738
13995	4921536K21Rik_01	4921536K21Rik	4921536K21Rik	XR_001780041.2,NM_026150.3	GRCm38.p6	chr11:3894944-3894979
13996	4921539E11Rik_01	4921539E11Rik	4921539E11Rik	NM_001163494.1,NM_027612.1,XM_017320385.2,XM_006503395.2,XM_006503396.3,XM_006503397.1	GRCm38.p6	chr4:103235775-103235810
13997	4930402F06Rik_01	4930402F06Rik	4930402F06Rik	XM_006498395.3,NM_001080709.2,NM_001272040.1	GRCm38.p6	chr2:35376290-35376335
13999	4930402K13Rik_01	4930402K13Rik	4930402K13Rik	NM_001270700.1	GRCm38.p6	chrX:9104942-9104977
14000	4930404H24Rik_01	4930404H24Rik	4930404H24Rik	XR_003954072.1,XR_375139.4,XR_003954073.1,XR_003954071.1	GRCm38.p6	chr2:153501536-153501570
14001	4930404N11Rik_01	4930404N11Rik	4930404N11Rik	NM_001014836.3	GRCm38.p6	chr10:81365723-81365757
14002	4930407I10Rik_01	4930407I10Rik	4930407I10Rik	NM_001166475.1	GRCm38.p6	chr15:82062523-82062558
14003	4930412O13Rik_01	4930412O13Rik	4930412O13Rik	NR_024257.1	GRCm38.p6	chr2:9885045-9885080
14004	4930415L06Rik_01	4930415L06Rik	4930415L06Rik	NM_001033880.3	GRCm38.p6	chrX:89932551-89932585
14006	4930430F08Rik_01	4930430F08Rik	4930430F08Rik	NM_175128.2,XM_006514028.4	GRCm38.p6	chr10:100586238-100586277
14008	4930432M17Rik_01	4930432M17Rik	4930432M17Rik	NM_001033814.2	GRCm38.p6	chr3:121671345-121671380
14009	4930433I11Rik_01	4930433I11Rik	4930433I11Rik	NM_207248.3	GRCm38.p6	chr7:40993251-40993287
14010	4930438A08Rik_01	4930438A08Rik	4930438A08Rik	XM_003689172.5,NM_001374705.1,XM_001477470.6	GRCm38.p6	chr11:58287446-58287480
14011	4930444G20Rik_01	4930444G20Rik	4930444G20Rik	NM_053264.2	GRCm38.p6	chr10:22067890-22067926
14012	4930444P10Rik_01	4930444P10Rik	4930444P10Rik	XM_006495582.2,XM_030243351.1,NM_001305227.1,XM_030243353.1,XM_006495584.4,NM_001243238.2	GRCm38.p6	chr1:16078609-16078658
14013	4930445K14Rik_01	4930445K14Rik	4930445K14Rik	XR_003953757.1	GRCm38.p6	chr2:164876331-164876367
14014	4930447A16Rik_01	4930447A16Rik	4930447A16Rik	NM_029113.1,XM_017316774.2	GRCm38.p6	chr15:37425667-37425701
14015	4930447C04Rik_01	4930447C04Rik	4930447C04Rik	XM_017315239.1,XR_001780500.1,XR_001780501.1,XM_011244200.2,XM_011244205.2,XM_017315240.1,XM_011244201.2,XM_017315237.1,XR_001780502.1,XM_011244206.2,NM_029444.2,XM_011244202.2,XM_017315238.1,XM_011244203.3,XR_001780504.1	GRCm38.p6	chr12:72892858-72892905
14016	4930449I24Rik_01	4930449I24Rik	Gm3409,Gm3402,4930449I24Rik,Gm3404,Gm6370,Gm3415,Gm6309	NM_001374732.1,NM_001243110.1,XM_886734.5,XM_017321054.2,NM_001243111.1,XM_003688818.4,XM_006504863.3,XM_011240996.2,NM_001374731.1,XM_006504780.2,NM_026136.2,NM_001243113.1,XM_006504853.4,XM_011240997.2,XM_011240998.2,NM_001243109.1,NM_001243114.1	GRCm38.p6	chr5:146493252-146493286,chr5:146168822-146168856,chr5:146516012-146516046,chr5:146539537-146539571,chr5:146527687-146527721,chr5:146558025-146558059,chr5:146504290-146504324
14018	4930451I11Rik_01	4930451I11Rik	4930451I11Rik	NM_183131.3,XM_006508347.3	GRCm38.p6	chr7:126830931-126830980
14020	4930453N24Rik_01	4930453N24Rik	4930453N24Rik	NM_026273.2,XM_006522489.3	GRCm38.p6	chr16:64766505-64766540
14021	4930455H04Rik_01	4930455H04Rik	4930455H04Rik	NR_040596.1	GRCm38.p6	chr3:116983782-116983821
14022	4930467E23Rik_01	4930467E23Rik	Gm15319,Gm21119,4930467E23Rik	XM_011242034.3,NM_001270553.1,NM_001177408.1,NM_001039553.2,XR_003947210.1	GRCm38.p6	chr8:19729750-19729789,chr8:20362989-20363028,chr8:20615101-20615140
14023	4930469K13Rik_01	4930469K13Rik	4930469K13Rik	NR_155520.1	GRCm38.p6	chr11:33974058-33974092
14024	4930470P17Rik_01	4930470P17Rik	4930470P17Rik	NR_027825.1	GRCm38.p6	chr2:170601275-170601324
14025	4930474N05Rik_01	4930474N05Rik	4930474N05Rik	XM_006518825.2,NM_175008.3	GRCm38.p6	chr14:36094998-36095034
14026	4930480E11Rik_01	4930480E11Rik	4930480E11Rik	NM_001177966.2	GRCm38.p6	chrX:78369734-78369773
14027	4930486L24Rik_01	4930486L24Rik	4930486L24Rik	NM_178098.2	GRCm38.p6	chr13:60853182-60853217
14029	4930503L19Rik_01	4930503L19Rik	4930503L19Rik	XR_385995.2,XR_003952526.1,XM_030250479.1,XM_030250480.1,XR_385993.4,XM_030250477.1,XR_385996.4,XR_003952525.1,XM_030250478.1,XM_006525964.4,XR_003952524.1,NM_172967.2	GRCm38.p6	chr18:70468365-70468414
14030	4930505A04Rik_01	4930505A04Rik	4930505A04Rik	NM_001100394.1	GRCm38.p6	chr11:30426270-30426305
14031	4930512M02Rik_01	4930512M02Rik	4930512M02Rik	NM_001305143.1	GRCm38.p6	chr11:11589327-11589362
14032	4930513O06Rik_01	4930513O06Rik	4930513O06Rik	NM_029174.1	GRCm38.p6	chrX:139090831-139090877
14033	4930519G04Rik_01	4930519G04Rik	4930519G04Rik	XM_017321078.1,XM_030254773.1,XM_006530443.1,XM_006530440.2,NM_026263.2,XM_006530445.3,XM_030254774.1,XM_006530441.4	GRCm38.p6	chr5:114870191-114870228
14034	4930522H14Rik_01	4930522H14Rik	4930522H14Rik	NM_026291.3,NM_001199090.1	GRCm38.p6	chr4:109527991-109528026
14035	4930523C07Rik_01	4930523C07Rik	4930523C07Rik	NM_001162896.1,XM_006496968.3,XM_030242454.1	GRCm38.p6	chr1:160075269-160075318
14036	4930524B15Rik_01	4930524B15Rik	4930524B15Rik	NM_026262.1,XM_006514795.1	GRCm38.p6	chr11:31965680-31965714
14037	4930524J08Rik_01	4930524J08Rik	4930524J08Rik	XM_030254981.1	GRCm38.p6	chr5:99979097-99979131
14038	4930544D05Rik_01	4930544D05Rik	4930544D05Rik	NM_001145537.1,XM_006533966.4	GRCm38.p6	chr11:70616810-70616845
14039	4930544G11Rik_01	4930544G11Rik	4930544G11Rik	NM_001161773.1	GRCm38.p6	chr6:65952862-65952911
14040	4930548H24Rik_01	4930548H24Rik	4930548H24Rik	NM_026296.3	GRCm38.p6	chr5:31486031-31486066
14041	4930550C14Rik_01	4930550C14Rik	4930550C14Rik	XM_006510654.4,NM_001376945.1,NM_029247.3,XM_006510656.4,NM_001376943.1,NM_029247.4,XM_006510660.4,NM_001376944.1	GRCm38.p6	chr9:53428146-53428180
14043	4930555G01Rik_01	4930555G01Rik	Gm3115,4930555G01Rik,Gm3127,Gm9603,Gm9602,Gm3685,Gm5458,Gm6337,Gm3629,Gm3727,Gm3050,Gm3642,Gm7876,Gm3159,Gm2977,Gm3594,Gm10410,Gm16434,Gm3424,Gm8246,Gm6676,Gm2888,LOC108168187,Gm3182,Gm21560	XR_001781353.1,XM_011244839.1,XM_030248133.1,XM_030247878.1,XM_001475283.5,XM_011244823.1,XM_011244854.1,XM_017316324.1,XM_017316333.1,XM_017316311.1,NM_175393.4,XM_017316309.2,XM_011244827.1,XM_030247877.1,XM_030248230.1,XM_030248231.1,XM_030248175.1,XM_030248174.1,XM_017316310.2,XR_001781383.2,XR_003950937.1,XM_017316334.1,XM_006518194.4,XM_017316335.1,XM_030248173.1,XM_011244834.2,XM_030248172…	GRCm38.p6	chr14:4984881-4984930,chr14:7124398-7124447,chr14:6443627-6443676,chr14:5051593-5051642,chr14:6536277-6536326,chr14:3030889-3030938,chr14:7043977-7044026,chr14:4085037-4085086,chr14:3555421-3555470,chr14:6218277-6218326,chr14:6621424-6621473,chr14:6839375-6839424,chr14:4710183-4710232,chr14:19601587-19601636,chr14:4777300-4777349,chr14:3793460-3793509,chr14:5686444-5686493,chr14:4398461-4398510,c…
14044	4930558C23Rik_01	4930558C23Rik	4930558C23Rik	NR_015490.1	GRCm38.p6	chr3:95386778-95386812
14045	4930558K02Rik_01	4930558K02Rik	4930558K02Rik	NM_001204904.1,NM_001204905.1,XM_030243265.1,XM_006497015.2	GRCm38.p6	chr1:161952607-161952642
14046	4930562C15Rik_01	4930562C15Rik	4930562C15Rik	XM_011246045.2,NM_030192.1	GRCm38.p6	chr16:4849864-4849899
14047	4930563E22Rik_01	4930563E22Rik	4930563E22Rik	NM_001163728.1	GRCm38.p6	chr11:72215381-72215415
14048	4930563M21Rik_01	4930563M21Rik	4930563M21Rik	XM_017313674.2,NM_183111.2,XM_017313675.2,XM_017313672.2,XM_017313676.1,XM_017313673.2,XM_017313677.2,XM_006511524.4	GRCm38.p6	chr9:55973733-55973769
14049	4930564C03Rik_01	4930564C03Rik	4930564C03Rik	NM_029257.1	GRCm38.p6	chr17:44880251-44880285
14050	4930564D02Rik_01	4930564D02Rik	4930564D02Rik	XM_017319781.1,XM_017319779.1,XM_017319782.1,XM_017319780.1,NM_029228.1	GRCm38.p6	chr3:105078334-105078368
14051	4930567H17Rik_01	4930567H17Rik	Gm14725,4930567H17Rik	NM_001081476.1,NR_157388.1	GRCm38.p6	chrX:70545825-70545869,chrX:70394429-70394473
14052	4930568D16Rik_01	4930568D16Rik	4930568D16Rik	NM_029463.1,XM_006498396.3	GRCm38.p6	chr2:35366201-35366246
14053	4930578G10Rik_01	4930578G10Rik	4930578G10Rik	NR_155456.1	GRCm38.p6	chr4:42871673-42871707
14054	4930578I06Rik_01	4930578I06Rik	4930578I06Rik	XM_006519472.4,NM_026359.4	GRCm38.p6	chr14:63986162-63986199
14055	4930578L24Rik_01	4930578L24Rik	4930578L24Rik	NR_155448.1	GRCm38.p6	chr18:73706257-73706295
14056	4930579F01Rik_01	4930579F01Rik	4930579F01Rik	NM_001163385.1,XM_006501945.4,NM_001163386.1,XM_006501946.3,NM_001374685.1	GRCm38.p6	chr3:138176510-138176545
14057	4930579G24Rik_01	4930579G24Rik	4930579G24Rik	NM_029482.1	GRCm38.p6	chr3:79631129-79631178
14058	4930583I09Rik_01	4930583I09Rik	4930583I09Rik	NM_030031.1	GRCm38.p6	chr17:64834557-64834591
14059	4930590J08Rik_01	4930590J08Rik	4930590J08Rik	XM_017321666.2,XM_017321665.2,NM_198668.2,XM_017321667.2,XM_006506332.4	GRCm38.p6	chr6:91915143-91915178
14060	4930595D18Rik_01	4930595D18Rik	4930595D18Rik	NR_130987.1	GRCm38.p6	chr12:111160202-111160236
14061	4930595M18Rik_01	4930595M18Rik	4930595M18Rik	NM_173435.3	GRCm38.p6	chrX:81457685-81457724
14062	4930596D02Rik_01	4930596D02Rik	4930596D02Rik	NM_001033766.3	GRCm38.p6	chr14:35811811-35811860
14063	4931400O07Rik_01	4931400O07Rik	4931400O07Rik	XM_030251552.1,NR_164353.1,XR_878122.1,NR_164352.1	GRCm38.p6	chrX:62468472-62468513
14064	4931406B18Rik_01	4931406B18Rik	4931406B18Rik	NM_028737.3,XM_017312340.1	GRCm38.p6	chr7:43499310-43499359
14065	4931406C07Rik_01	4931406C07Rik	4931406C07Rik	NM_001359258.1,XM_006510596.2,NM_001199484.1,NM_133732.3,NM_001199485.1,XM_030244585.1	GRCm38.p6	chr9:15294468-15294505
14067	4931408C20Rik_01	4931408C20Rik	4931408C20Rik	NM_001033764.3	GRCm38.p6	chr1:26685527-26685570
14068	4931414P19Rik_01	4931414P19Rik	4931414P19Rik	XM_006519619.4,NM_028890.2,XM_011245210.3,XM_006519618.4,XM_006519620.4	GRCm38.p6	chr14:54591341-54591384
14069	4931417E11Rik_01	4931417E11Rik	4931417E11Rik	NM_025737.3	GRCm38.p6	chr6:73469376-73469425
14070	4931422A03Rik_01	4931422A03Rik	4931422A03Rik	XM_030252076.1,NM_175161.3	GRCm38.p6	chr2:104026158-104026193
14071	4931428F04Rik_01	4931428F04Rik	4931428F04Rik	XM_006531433.4,NM_001166394.1,NM_028888.2,XM_017312991.2	GRCm38.p6	chr8:105285057-105285094
14072	4931428L18Rik_01	4931428L18Rik	4931428L18Rik	NR_033445.1	GRCm38.p6	chr1:31141661-31141695
14073	4931429L15Rik_01	4931429L15Rik	4931429L15Rik	XM_030244686.1,XM_030244683.1,XM_011242616.1,XR_003948040.1,XR_003948039.1,XM_030244685.1,XM_030244684.1,XR_001779048.1,NM_183104.2	GRCm38.p6	chr9:46310262-46310303
14074	4932411N23Rik_01	4932411N23Rik	4932411N23Rik	NM_177705.3	GRCm38.p6	chrX:126814631-126814666
14075	4932414N04Rik_01	4932414N04Rik	4932414N04Rik	XM_017319307.2,XM_017319308.2,NM_183113.3,XM_006500335.3,XM_006500336.2	GRCm38.p6	chr2:68711382-68711417
14076	4932429P05Rik_01	4932429P05Rik	4932429P05Rik	NM_001085511.1	GRCm38.p6	chrX:89752672-89752714
14077	4932438A13Rik_01	4932438A13Rik	4932438A13Rik	XM_006535452.4,XM_017319536.2,XM_030252556.1,XM_030252557.1,NM_172679.2,XM_006535450.4,XR_001783681.2,XM_006535456.4,XM_006535453.4,XM_017319538.2,XM_006535448.4,XM_006535447.4,XM_006535454.4,XM_006535446.4,XM_006535455.4,XM_017319537.2,XM_006535451.4	GRCm38.p6	chr3:36928565-36928606
14078	4932438H23Rik_01	4932438H23Rik	4932438H23Rik	XM_030249316.1,NM_001163695.2,XM_030249317.1,XM_030249314.1,NM_028905.4,XM_030249315.1	GRCm38.p6	chr16:91056061-91056108
14079	4933400A11Rik_01	4933400A11Rik	4933400A11Rik	NR_003635.1	GRCm38.p6	chrX:169776531-169776568
14080	4933402D24Rik_01	4933402D24Rik	4933402D24Rik	NM_001256158.1	GRCm38.p6	chr1:63768504-63768538
14082	4933402J07Rik_01	4933402J07Rik	4933402J07Rik	NM_177901.3	GRCm38.p6	chr8:87568493-87568532
14083	4933402N03Rik_01	4933402N03Rik	4933402N03Rik	NM_173409.4	GRCm38.p6	chr7:131145882-131145919
14084	4933403O08Rik_01	4933403O08Rik	4933403O08Rik	NM_001177389.1,XM_011247708.1	GRCm38.p6	chrX:112240608-112240643
14085	4933405L10Rik_01	4933405L10Rik	4933405L10Rik	NM_001357256.1,NM_027655.2	GRCm38.p6	chr8:105710023-105710062
14086	4933405O20Rik_01	4933405O20Rik	4933405O20Rik	NM_172901.2	GRCm38.p6	chr7:50599269-50599312
14087	4933407L21Rik_01	4933407L21Rik	4933407L21Rik	NR_037692.1	GRCm38.p6	chr1:85928708-85928745
14088	4933407O12Rik_01	4933407O12Rik	4933407O12Rik	XM_006525248.3,XM_006525247.3	GRCm38.p6	chr17:80062406-80062440
14089	4933409G03Rik_01	4933409G03Rik	4933409G03Rik	NM_177651.3	GRCm38.p6	chr2:68591481-68591515
14090	4933411K16Rik_01	4933411K16Rik	4933411K16Rik	NM_025752.2	GRCm38.p6	chr19:42052507-42052542
14091	4933412E24Rik_01	4933412E24Rik	4933412E24Rik	NM_027668.1	GRCm38.p6	chr15:60016040-60016075
14092	4933414I15Rik_01	4933414I15Rik	4933414I15Rik	XR_879829.2	GRCm38.p6	chr11:50942159-50942193
14093	4933417A18Rik_01	4933417A18Rik	4933417A18Rik	NM_025750.3,XM_011244329.1	GRCm38.p6	chr13:34944228-34944265
14094	4933421I07Rik_01	4933421I07Rik	4933421I07Rik	NM_001370772.1,NM_027702.3	GRCm38.p6	chr7:42448031-42448065
14095	4933424G06Rik_01	4933424G06Rik	4933424G06Rik	NM_001374322.1
14096	4933427D14Rik_01	4933427D14Rik	4933427D14Rik	NR_155067.1,XM_006534370.4,XM_030246402.1,NR_155066.1,NM_001361564.1,NM_028963.3,XM_006534369.4,NR_155065.1,XR_001780070.2,XM_006534373.2,XM_006534372.4,XR_388546.4,XR_001780071.2,XM_017314813.1,XR_003949524.1,XM_006534367.3	GRCm38.p6	chr11:72198904-72198943
14097	4933427I04Rik_01	4933427I04Rik	4933427I04Rik	NR_165172.1
14098	4933428G20Rik_01	4933428G20Rik	4933428G20Rik	XM_030245434.1,XM_030245433.1,XM_030245435.1,NM_001289118.1	GRCm38.p6	chr11:97492676-97492710
14099	4933428M09Rik_01	4933428M09Rik	4933428M09Rik	NM_001357856.1	GRCm38.p6	chrX:139179719-139179754
14100	4933430I17Rik_01	4933430I17Rik	4933430I17Rik	NM_177607.3,XR_003954905.1,NM_001377106.1,NM_177607.4,XM_030253385.1,XM_011249971.3,XM_030253386.1,NM_001356422.1,XM_030253387.1,NM_001356422.2,XM_006537739.4,NM_001356421.2,XM_030253384.1,NM_001356421.1,XM_006537740.4,NM_001356420.2,NM_001356420.1,XM_006537736.4	GRCm38.p6	chr4:62532524-62532565
14101	4933434E20Rik_01	4933434E20Rik	4933434E20Rik	NM_025762.3,NM_001287086.1,NM_027500.4,NM_001287087.1	GRCm38.p6	chr3:90058559-90058598
14102	4933436I01Rik_01	4933436I01Rik	4933436I01Rik	NM_025763.1	GRCm38.p6	chrX:67921356-67921392
14103	4933440N22Rik_01	4933440N22Rik	4933440N22Rik	XM_017321877.1	GRCm38.p6	chr6:117907694-117907731
14104	5031439G07Rik_01	5031439G07Rik	5031439G07Rik	NM_001368660.1,NM_001033273.3	GRCm38.p6	chr15:84949595-84949630
14106	5430401F13Rik_01	5430401F13Rik	5430401F13Rik	NM_001244628.1	GRCm38.p6	chr6:131552688-131552724
14107	5430402E10Rik_01	5430402E10Rik	5430402E10Rik,Gm14744	NM_027768.3,NM_001085544.1	GRCm38.p6	chrX:77867073-77867107,chrX:77922700-77922734
14109	5530400C23Rik_01	5530400C23Rik	5530400C23Rik	NM_027784.1	GRCm38.p6	chr6:133294435-133294484
14110	5530401A14Rik_01	5530401A14Rik	5530401A14Rik	NR_038010.1	GRCm38.p6	chr11:81894504-81894540
14111	5730409E04Rik_01	5730409E04Rik	5730409E04Rik	NM_001013755.3,NM_001145950.1	GRCm38.p6	chr4:126611825-126611860
14112	5730455P16Rik_01	5730455P16Rik	5730455P16Rik	XM_006534197.4,NM_027472.3,XM_006534199.4,XM_006534198.3	GRCm38.p6	chr11:80375579-80375614
14113	5730480H06Rik_01	5730480H06Rik	5730480H06Rik	NR_045500.1	GRCm38.p6	chr5:48402436-48402470
14114	5730522E02Rik_01	5730522E02Rik	5730522E02Rik	NR_027973.1	GRCm38.p6	chr11:25617710-25617744
14115	5730596B20Rik_01	5730596B20Rik	5730596B20Rik	NR_163848.1	GRCm38.p6	chr6:52180265-52180299
14117	6030458C11Rik_01	6030458C11Rik	6030458C11Rik	XM_011245382.2,NM_001357761.1,NM_029998.3,NM_001166360.1	GRCm38.p6	chr15:12824510-12824544
14118	6030468B19Rik_01	6030468B19Rik	6030468B19Rik	XM_006534499.4,XM_006534500.4,NM_029964.1,XM_006534498.4	GRCm38.p6	chr11:117806000-117806034
14119	6030498E09Rik_01	6030498E09Rik	6030498E09Rik	NM_183126.2	GRCm38.p6	chrX:38958314-38958349
14120	6330403K07Rik_01	6330403K07Rik	6330403K07Rik	NM_134022.2	GRCm38.p6	chr11:71033326-71033367
14121	6330409D20Rik_01	6330409D20Rik	6330409D20Rik	NM_027529.1	GRCm38.p6	chr2:32737570-32737607
14122	6430548M08Rik_01	6430548M08Rik	6430548M08Rik	XM_006530934.3,NM_001163761.1,NM_172286.4,NM_001163762.1,NM_001163760.1	GRCm38.p6	chr8:120145486-120145520
14123	6430550D23Rik_01	6430550D23Rik	6430550D23Rik	XM_006499731.3,XM_017319001.2,XR_001783013.2,NM_001145352.1,XM_006499729.4,XM_006499728.3,XM_006499732.3,XR_866295.3,NM_001145351.1,XM_030251751.1,XM_006499730.4	GRCm38.p6	chr2:156003422-156003456
14124	6430571L13Rik_01	6430571L13Rik	6430571L13Rik	NM_175486.3	GRCm38.p6	chr9:107342477-107342512
14125	6430628N08Rik_01	6430628N08Rik	6430628N08Rik	NM_001357060.1	GRCm38.p6	chr4:115898480-115898514
14126	6820408C15Rik_01	6820408C15Rik	6820408C15Rik	NM_001289738.1,NM_177656.4,XM_011239480.3,XM_006499318.4,XM_011239479.3,NR_110367.1,XM_006499317.4,NR_110368.1,XM_006499316.4	GRCm38.p6	chr2:152440827-152440862
14127	7420426K07Rik_01	7420426K07Rik	7420426K07Rik	NM_001033983.3	GRCm38.p6	chr9:98903472-98903506
14128	7530416G11Rik_01	7530416G11Rik	7530416G11Rik	NM_001256072.1,XM_017316669.2	GRCm38.p6	chr15:85494675-85494709
14129	8030423J24Rik_01	8030423J24Rik	8030423J24Rik	NR_157373.1	GRCm38.p6	chr13:70884160-70884194
14130	8030462N17Rik_01	8030462N17Rik	8030462N17Rik	XM_011247070.3,NM_178670.4,XM_011247067.3,XM_006526428.2,XM_006526426.2,NM_001368759.1,XM_011247069.3	GRCm38.p6	chr18:77643149-77643184
14131	8030474K03Rik_01	8030474K03Rik	8030474K03Rik	XM_017318680.2,XM_006528367.3,XM_030251376.1,XM_006528368.4,NM_001359671.1	GRCm38.p6	chrX:101795807-101795841
14132	9030025P20Rik_01	9030025P20Rik	9030025P20Rik,Ermard,Gm3435	XM_006524458.2,XM_006524463.2,XM_011246510.2,XR_003952143.1,XR_003952065.1,XM_030249396.1,XM_006524462.3,XM_006524461.2,XM_011246509.2,XM_030249852.1,XM_006524465.2,XM_006523366.4,XM_006524464.2,XR_876519.2,XR_385340.2,XM_006523365.2,XR_003952068.1,XM_030249857.1,XM_006524466.3,XM_006523367.2,XR_385341.2,XR_003952144.1,XM_030249856.1,NM_001360402.1,XM_030249399.1,XM_030249855.1,XR_876517.2,NM_001…	GRCm38.p6	chr17:14979607-14979648,chr17:15010979-15011020,chr17:15042354-15042395
14133	9030624G23Rik_01	9030624G23Rik	Gm40847,LOC108167368,1700030C10Rik,Gm38538,Gm10479,9030624G23Rik,5730507C01Rik,Gm10476,Gm5784,3110053B16Rik,6030426L16Rik,Asap2	XM_030246874.1,XR_872516.3,XR_001780512.1,NM_001374072.1,XR_001780443.2,XR_001780507.1,NM_001201330.1,NM_001004364.2,XM_006515048.2,XM_017315270.1,XM_006515047.2,XM_017315267.1,NM_001135192.1,NM_001256489.1,XR_003950190.1,XM_030247057.1,XM_017315269.1,NM_001033157.4,XM_017315268.1,NR_015521.1,XM_011243957.2,NM_001098168.1,XM_011243929.2,XM_017315266.1,XM_030247037.1,XM_011243861.2,XR_003950222.1,…	GRCm38.p6	chr12:18853876-18853910,chr12:21778564-21778598,chr12:20815433-20815467,chr12:20615308-20615342,chr12:24096930-24096964,chr12:22466678-22466712,chr12:19388092-19388126,chr12:21784230-21784264,chr12:21112048-21112082,chr12:22745375-22745409,chr12:20415942-20415976,chr12:20920929-20920963,chr12:18514742-18514776
14134	9130008F23Rik_01	9130008F23Rik	9130008F23Rik	NM_027834.3	GRCm38.p6	chr17:40880203-40880238
14135	9130019O22Rik_01	9130019O22Rik	9130019O22Rik	NM_030226.3	GRCm38.p6	chr7:127386920-127386954
14136	9130023H24Rik_01	9130023H24Rik	9130023H24Rik	NM_177001.3	GRCm38.p6	chr7:128237014-128237053
14137	9130213A22Rik_01	9130213A22Rik	9130213A22Rik	XR_003949705.1,XR_003949706.1	GRCm38.p6	chr11:69121340-69121387
14138	9130230L23Rik_01	9130230L23Rik	9130230L23Rik	NR_027961.1	GRCm38.p6	chr5:66001374-66001408
14139	9130401M01Rik_01	9130401M01Rik	9130401M01Rik	NM_029418.4	GRCm38.p6	chr15:58022445-58022484
14140	9130409I23Rik_01	9130409I23Rik	9130409I23Rik	NM_001033819.2,XM_017321873.2	GRCm38.p6	chr1:181054786-181054820
52106	9230019H11Rik_01	9230019H11Rik	9230019H11Rik	NM_001033977.2
14141	9230102O04Rik_01	9230102O04Rik	9230102O04Rik	NR_040511.1	GRCm38.p6	chr2:9883041-9883083
14142	9230112D13Rik_01	9230112D13Rik	9230112D13Rik	NM_030062.1	GRCm38.p6	chr14:34512062-34512101
14143	9330159F19Rik_01	9330159F19Rik	9330159F19Rik	XM_006512646.3,XM_006512649.3,XM_017313869.2,NM_001162537.2,XM_017313870.2	GRCm38.p6	chr10:29224243-29224278
14145	9330182O14Rik_01	9330182O14Rik	9330182O14Rik	NM_001256056.1	GRCm38.p6	chr15:40148524-40148561
14146	9430015G10Rik_01	9430015G10Rik	9430015G10Rik	XM_030253514.1,NM_145557.3,XM_006538834.3,NM_177205.1	GRCm38.p6	chr4:156119178-156119215
14147	9430038I01Rik_01	9430038I01Rik	9430038I01Rik	XM_006508331.4,XM_006508329.4,XM_011241948.3,NM_029886.2,XM_011241949.3,XM_030243094.1	GRCm38.p6	chr7:137387568-137387602
14148	9430069I07Rik_01	9430069I07Rik	9430069I07Rik	NM_001256161.1	GRCm38.p6	chr15:34349197-34349234
14149	9430097D07Rik_01	9430097D07Rik	9430097D07Rik	XR_866126.3	GRCm38.p6	chr2:32575154-32575189
14150	9530002B09Rik_01	9530002B09Rik	9530002B09Rik	NM_023865.3	GRCm38.p6	chr4:122689419-122689457
14151	9530003J23Rik_01	9530003J23Rik	9530003J23Rik	NM_029906.3	GRCm38.p6	chr10:117235619-117235658
14152	9530053A07Rik_01	9530053A07Rik	9530053A07Rik	NM_001164655.1	GRCm38.p6	chr7:28140111-28140146
14153	9530068E07Rik_01	9530068E07Rik	9530068E07Rik	NM_153117.2	GRCm38.p6	chr11:52406967-52407004
14154	9530077C05Rik_01	9530077C05Rik	9530077C05Rik	XR_001779003.2,XM_006510571.3,XM_017313548.1,XM_006510568.4,NR_152381.1,XM_030244543.1,NR_152382.1,XM_011242589.2,XM_006510573.2,NM_026739.2,XM_011242592.2	GRCm38.p6	chr9:22439875-22439910
14155	9830107B12Rik_01	9830107B12Rik	9830107B12Rik	XM_017317513.1,NM_001177896.1,XM_017317512.1,NM_177824.4,XM_017317514.1,NM_001177897.1	GRCm38.p6	chr17:48145406-48145442
14156	9930012K11Rik_01	9930012K11Rik	9930012K11Rik	NM_001112735.1,NM_001004155.2	GRCm38.p6	chr14:70157241-70157276
14157	9930021J03Rik_01	9930021J03Rik	9930021J03Rik	XM_006527072.4,XR_001782590.2,XM_030250936.1,XM_017318196.2,XM_017318193.2,XM_030250937.1,XR_003952789.1,NM_172836.3,XM_006527070.4,XR_003952790.1,XM_017318194.2,XM_006527069.4,XR_001782588.2,XR_003952791.1,XM_017318195.2,XM_030250938.1	GRCm38.p6	chr19:29743538-29743572
14158	9930104L06Rik_01	9930104L06Rik	9930104L06Rik	XM_006502885.2,NM_001355605.1,NM_001355603.1,NM_177573.3,XM_006502884.4	GRCm38.p6	chr4:124938627-124938663
14159	9930111J21Rik1_01	9930111J21Rik1	9930111J21Rik2,9930111J21Rik1	NM_173434.1,NM_001114679.1	GRCm38.p6	chr11:48967316-48967362,chr11:49039159-49039205
14160	a_01	a	a	NM_015770.3,XM_011239691.2	GRCm38.p6	chr2:155047681-155047715
14161	A130010J15Rik_01	A130010J15Rik	A130010J15Rik	NM_181048.3,NM_001160359.1,XM_006497253.4,NM_001160360.1	GRCm38.p6	chr1:193174608-193174645
14162	A1bg_01	A1bg	A1bg	NM_001081067.1	GRCm38.p6	chr15:60919666-60919703
14163	A1cf_01	A1cf	A1cf	XM_017318290.2,NM_001365078.1,NM_001081074.2	GRCm38.p6	chr19:31927133-31927176
20406	A230006K03Rik_01	A230006K03Rik	A230006K03Rik	XM_030243172.1,XM_030243173.1,XR_001778145.2,XM_030243171.1,XM_030243174.1,XR_001778146.2	GRCm38.p6	chr7:61290989-61291023
14164	A230072I06Rik_01	A230072I06Rik	A230072I06Rik	XM_030243896.1	GRCm38.p6	chr8:12279634-12279668
14165	A26c2_01	A26c2	A26c2	XM_030243179.1,XM_030243178.1	GRCm38.p6	chr7:62823433-62823472
14166	A26c3_01	A26c3	A26c3	XM_006500082.3,NM_026248.3	GRCm38.p6	chr2:111227965-111228002
14167	A2m_01	A2m	A2m	XM_011241322.2,NM_175628.3	GRCm38.p6	chr6:121638369-121638404
14168	A2ml1_01	A2ml1	A2ml1	NM_001001179.3	GRCm38.p6	chr6:128581019-128581056
14169	A330070K13Rik_01	A330070K13Rik	A330070K13Rik	NM_198665.2	GRCm38.p6	chr5:130384458-130384492
14170	A3galt2_01	A3galt2	A3galt2	NM_001009819.2	GRCm38.p6	chr4:128761693-128761728
14171	A430005L14Rik_01	A430005L14Rik	A430005L14Rik	NM_175287.4,NM_001163019.1	GRCm38.p6	chr4:153960531-153960565
14172	A430033K04Rik_01	A430033K04Rik	A430033K04Rik	NM_183025.2	GRCm38.p6	chr5:138646322-138646357
14173	A4galt_01	A4galt	A4galt	NM_001170954.2,XM_030248559.1,NM_001004150.4,NM_001370647.1	GRCm38.p6	chr15:83228301-83228336
14174	A4gnt_01	A4gnt	A4gnt	XM_006511244.4,XM_006511246.4,NM_001077424.2	GRCm38.p6	chr9:99613435-99613474
14175	A530016L24Rik_01	A530016L24Rik	A530016L24Rik	XM_006515980.4,NM_177039.4,XM_006515981.4	GRCm38.p6	chr12:112495007-112495042
14176	A530032D15Rik_01	A530032D15Rik	LOC102637495,LOC100041057,A530032D15Rik,LOC100041708,LOC105242429,C130026I21Rik	XM_006535864.4,XM_030251627.1,XM_011249814.1,XM_030251626.1,XM_017321386.2,XM_011249815.1,XM_011249818.1,XM_030255715.1,XM_011249819.3,XM_017321884.2,XM_017321384.2,XM_017321885.2,XM_030255716.1,NM_001037909.3,XR_880808.3,XM_017321880.2,XM_017321881.2,XM_017318888.2,XM_030255713.1,XM_006496502.4,XM_030251630.1,XM_006496512.4,XM_011249820.2,XM_030251629.1,XM_030251628.1,XM_006535865.2,XM_017318891…	GRCm38.p6	chr1:85254518-85254552,chr1:85094301-85094335
14177	A530064D06Rik_01	A530064D06Rik	A530064D06Rik	NM_001113556.1,NM_178796.6	GRCm38.p6	chr17:48166383-48166432
14178	A630001G21Rik_01	A630001G21Rik	A630001G21Rik	XM_017321191.1,NM_177055.3,XM_011248032.1,XM_030254953.1,XM_011248033.1	GRCm38.p6	chr1:85725247-85725286
14179	A630010A05Rik_01	A630010A05Rik	A630010A05Rik	NR_033556.1	GRCm38.p6	chr16:14618626-14618660
14180	A630023A22Rik_01	A630023A22Rik	A630023A22Rik	NM_001251843.1	GRCm38.p6	chr14:34052632-34052675
14181	A630073D07Rik_01	A630073D07Rik	A630073D07Rik	NM_001142969.1	GRCm38.p6	chr6:132627441-132627477
14182	A630076J17Rik_01	A630076J17Rik	A630076J17Rik	NM_001256174.1	GRCm38.p6	chr3:107233578-107233612
14183	A630095N17Rik_01	A630095N17Rik	A630095N17Rik	XM_006496500.4,NM_001243090.1,NM_001243091.1	GRCm38.p6	chr1:75223306-75223343
14184	A730009L09Rik_01	A730009L09Rik	A730009L09Rik	XR_384996.4	GRCm38.p6	chr16:84525648-84525682
14185	A730046J19Rik_01	A730046J19Rik	A730046J19Rik	NM_001354493.1	GRCm38.p6	chrX:144162771-144162814
14186	A730049H05Rik_01	A730049H05Rik	A730049H05Rik	XR_003956474.1,XR_003956471.1,XR_001785329.2,XR_003956473.1,XR_003956472.1,XR_035139.6	GRCm38.p6	chr6:92827940-92827976
14187	A830005F24Rik_01	A830005F24Rik	A830005F24Rik	XM_001473764.4,NR_165458.1	GRCm38.p6	chr13:48514250-48514289
14188	A830018L16Rik_01	A830018L16Rik	A830018L16Rik	XM_030254976.1,NM_001160370.2,NM_001374634.1,XM_030254977.1,XM_006495543.4,NM_001160371.2,NM_001160369.2,XM_017321221.2,NM_177173.6,NM_001374633.1,XM_006495544.2,XM_006495541.4,XM_006495540.3,NM_001310451.1	GRCm38.p6	chr1:11596151-11596188
14189	A830031A19Rik_01	A830031A19Rik	A830031A19Rik	XR_003949867.1	GRCm38.p6	chr11:24035326-24035367
14190	A930004D18Rik_01	A930004D18Rik	A930004D18Rik	NR_028377.1,NR_028376.1	GRCm38.p6	chr2:18037694-18037728
14191	A930009A15Rik_01	A930009A15Rik	A930009A15Rik	NM_029982.1,XM_017314163.2	GRCm38.p6	chr10:115570220-115570255
14192	A930017K11Rik_01	A930017K11Rik	A930017K11Rik	NM_001358019.1,XM_030249394.1,XM_030249393.1	GRCm38.p6	chr17:25948354-25948389
14193	A930018O16Rik_01	A930018O16Rik	A930018O16Rik	XM_011244606.3	GRCm38.p6	chr13:69534667-69534702
14194	A930018P22Rik_01	A930018P22Rik	A930018P22Rik	NM_026634.2	GRCm38.p6	chr2:104123124-104123167
14195	A930033H14Rik_01	A930033H14Rik	A930033H14Rik	NM_001331193.1	GRCm38.p6	chr10:69212968-69213002
14196	AA467197_01	AA467197	AA467197	NM_001004174.2	GRCm38.p6	chr2:122639216-122639253
14197	AA792892_01	AA792892	AA792892	NM_178894.4	GRCm38.p6	chr5:94383538-94383572
14198	AA986860_01	AA986860	AA986860	XM_017319617.2,NM_177604.3	GRCm38.p6	chr1:130743042-130743079
14199	Aaas_01	Aaas	Aaas	NM_153416.2	GRCm38.p6	chr15:102349981-102350016
14200	Aacs_01	Aacs	Aacs	NM_030210.2	GRCm38.p6	chr5:125482845-125482888
14201	Aadac_01	Aadac	Aadac	NM_023383.1	GRCm38.p6	chr3:60031865-60031900
14202	Aadacl2_01	Aadacl2	Aadacl2	NM_001128091.1	GRCm38.p6	chr3:60024692-60024727
14203	Aadacl2fm1_01	Aadacl2fm1	Aadacl2fm1	NM_177661.3	GRCm38.p6	chr3:59936183-59936223
14204	Aadacl2fm2_01	Aadacl2fm2	Aadacl2fm2	NM_001101531.1	GRCm38.p6	chr3:59743628-59743677
14205	Aadacl2fm3_01	Aadacl2fm3	Aadacl2fm3	NM_001243003.1	GRCm38.p6	chr3:59866612-59866649
14206	Aadacl3_01	Aadacl3	Aadacl3	NM_001085503.2	GRCm38.p6	chr4:144457854-144457889
14207	Aadacl4_01	Aadacl4	Aadacl4	NM_001081248.1	GRCm38.p6	chr4:144613717-144613751
14208	Aadacl4fm1_01	Aadacl4fm1	Aadacl4fm1	NM_198662.3	GRCm38.p6	chr4:144519940-144519989
14209	Aadacl4fm2_01	Aadacl4fm2	Aadacl4fm2	NM_001085542.1	GRCm38.p6	chr4:144555710-144555749
14210	AAdacl4fm3_01	AAdacl4fm3	AAdacl4fm3	XM_006539057.4,NM_001085536.2	GRCm38.p6	chr4:144715380-144715419
14211	Aadacl4fm4_01	Aadacl4fm4	Aadacl4fm4	NM_001085504.1	GRCm38.p6	chr4:144674629-144674664
14212	Aadacl4fm5_01	Aadacl4fm5	Aadacl4fm5	NM_001126316.1	GRCm38.p6	chr4:144778131-144778168
14213	Aadat_01	Aadat	Aadat	NM_011834.2,XM_006509397.4	GRCm38.p6	chr8:60507176-60507215
14214	Aagab_01	Aagab	Aagab	NM_025857.3,NR_151671.1,XR_379442.3,NM_001357323.1	GRCm38.p6	chr9:63616764-63616801
20487	Aak1_01	Aak1	Aak1	NM_177762.6,NM_001040106.2,XM_006506837.2	GRCm38.p6	chr6:86995948-86995986
14215	Aamdc_01	Aamdc	Aamdc	NM_001177946.1,NM_001177945.1,NM_001177947.1,NM_183251.3,XM_006508114.4	GRCm38.p6	chr7:97565216-97565250
14216	Aamp_01	Aamp	Aamp	NM_001190444.1,XM_006495957.4,XM_006495958.4,NM_146110.3	GRCm38.p6	chr1:74282078-74282113
14217	Aanat_01	Aanat	Aanat	NM_009591.3,XM_030245474.1,NR_033223.1,XM_030245473.1	GRCm38.p6	chr11:116596163-116596197
14218	Aar2_01	Aar2	Aar2	NM_001164818.1,XM_006500097.4,NM_026661.4	GRCm38.p6	chr2:156550712-156550749
14219	Aard_01	Aard	Aard	NM_175503.3	GRCm38.p6	chr15:52044907-52044941
14220	Aars_01	Aars	Aars	XM_006530924.1,XM_017312748.2,XM_006530921.3,NM_146217.4,XM_006530922.1	GRCm38.p6	chr8:111040139-111040178
14221	Aars2_01	Aars2	Aars2	NM_198608.2,XR_385317.3,XM_017317440.2,XM_011246401.3,NM_001358000.1	GRCm38.p6	chr17:45515945-45515979
14222	Aarsd1_01	Aarsd1	Aarsd1	XM_030246279.1,NM_144829.1,XM_006534121.3	GRCm38.p6	chr11:101411132-101411179
14223	Aasdh_01	Aasdh	Aasdh	XM_006534859.4,XM_006534854.3,XM_030254394.1,NM_173765.3,XM_030254390.1,XM_017320841.2,XR_003955629.1,XM_030254391.1,XM_006534853.3,XR_003955628.1,XR_003955630.1,XR_001784673.2,XM_030254392.1,XR_880390.3,XR_880391.3,NM_001377004.1,XR_389268.4,NM_173765.4,XM_011249423.3,XR_389267.3,XM_006534856.4,XM_011249422.2,XM_006534857.4,XM_006534860.3	GRCm38.p6	chr5:76882786-76882827
14224	Aasdhppt_01	Aasdhppt	Aasdhppt	XM_017313536.2,NR_136941.1,NR_136940.1,XM_017313535.2,XM_006509877.4,XM_030244527.1,NM_001326359.1,NM_026276.3	GRCm38.p6	chr9:4302534-4302583
14225	Aass_01	Aass	Aass	NM_013930.4	GRCm38.p6	chr6:23115096-23115133
14226	Aatf_01	Aatf	Aatf	XR_879720.3,XM_006533789.4,XR_388499.4,XR_388498.4,XR_003949482.1,NM_019816.1,XM_011249153.3	GRCm38.p6	chr11:84509672-84509709
14227	Aatk_01	Aatk	Aatk	XR_003949229.1,NM_001377503.1,XM_006531992.4,NR_165305.1,NM_001198787.1,XM_006531991.3,NM_007377.4,XM_030245475.1,XM_006531995.1,XM_006531994.3,NR_165306.1,NM_001198785.1,XM_006531993.3	GRCm38.p6	chr11:120015463-120015504
14228	AB124611_01	AB124611	AB124611	XM_030244431.1,XR_870530.3,NM_001198794.1,NM_206536.2,XR_003947937.1,XM_011242567.3,XM_011242566.3	GRCm38.p6	chr9:21528994-21529029
14229	Abat_01	Abat	Abat	NM_172961.3,NM_001170978.1	GRCm38.p6	chr16:8600950-8600985
14230	Abca1_01	Abca1	Abca1	XM_006537555.3,NM_013454.3,XM_006537554.1,XM_006537556.1	GRCm38.p6	chr4:53143937-53143972
14231	Abca12_01	Abca12	Abca12	NM_175210.3	GRCm38.p6	chr1:71353726-71353761
14232	Abca13_01	Abca13	Abca13	NM_178259.3,XM_006514706.4	GRCm38.p6	chr11:9291263-9291300
14233	Abca14_01	Abca14	Abca14	XM_017312273.2,XM_006508142.3,XM_006508143.3,XM_017312271.2,XM_017312274.2,NM_026458.4,XR_003946550.1	GRCm38.p6	chr7:120212716-120212759
14234	Abca15_01	Abca15	Abca15	XM_006507945.4,NM_177213.3	GRCm38.p6	chr7:120332615-120332664
14235	Abca16_01	Abca16	Abca16	NM_001278943.1,NM_001278944.1,XM_006507683.2	GRCm38.p6	chr7:120433354-120433389
14236	Abca17_01	Abca17	Abca17	XM_030249865.1,XM_030249868.1,XM_006524482.4,XM_017317534.2,XM_030249866.1,XM_006524481.4,XM_006524484.4,XM_030249867.1,XM_017317539.2,XM_017317537.2,NM_001031621.3,XM_017317540.2,XM_017317538.2,XM_017317536.2,XR_001782084.2,XM_017317532.2,XR_001782083.2	GRCm38.p6	chr17:24295198-24295233
14237	Abca2_01	Abca2	Abca2	XM_006497609.1,XM_006497616.2,NM_001368624.1,XM_030246727.1,XM_006497615.2,NM_007379.3,XM_030246714.1,XM_006497611.1,XM_006497610.1,XM_006497614.4	GRCm38.p6	chr2:25434982-25435017
14238	Abca3_01	Abca3	Abca3	NM_001039581.2,NM_013855.3,XR_001782080.2,XM_006524370.3	GRCm38.p6	chr17:24364693-24364728
14239	Abca4_01	Abca4	Abca4	XR_375478.3,XM_006500911.3,XR_375477.3,XM_017319440.2,XM_006500912.3,NM_007378.1,XR_003954273.1,XM_017319439.1	GRCm38.p6	chr3:122126129-122126164
14240	Abca5_01	Abca5	Abca5	XM_006533065.4,NM_147219.2,XR_001779961.1	GRCm38.p6	chr11:110326642-110326687
14241	Abca6_01	Abca6	Abca6	NM_001166557.1,XM_006534413.2,NM_001166556.1,NM_147218.2,XM_006534414.2	GRCm38.p6	chr11:110245239-110245274
14242	Abca7_01	Abca7	Abca7	XM_006513711.2,XM_017313958.2,XM_006513712.4,NM_001347081.2,XR_003948698.1,XM_006513714.3,XR_003948699.1,XR_001779531.2,NM_013850.2	GRCm38.p6	chr10:79999506-79999545
14243	Abca8a_01	Abca8a	Abca8a	NM_153145.4,XM_006533063.3,XM_006533061.2,XM_006533062.4,XM_017314485.2	GRCm38.p6	chr11:110068065-110068102
14244	Abca8b_01	Abca8b	Abca8b	XM_006533464.4,XM_006533460.4,XM_006533463.3,NM_013851.3,XM_030246047.1,XM_006533461.4,NM_001362749.1,XM_006533459.4	GRCm38.p6	chr11:109957088-109957131
14245	Abca9_01	Abca9	Abca9	XM_017314487.2,NM_147220.2,XM_017314486.2	GRCm38.p6	chr11:110152013-110152048
14246	Abcb10_01	Abcb10	Abcb10	XM_006531201.4,NM_019552.2	GRCm38.p6	chr8:123968042-123968087
14247	Abcb11_01	Abcb11	Abcb11	NM_001363492.1,XM_006499670.4,NM_021022.3	GRCm38.p6	chr2:69286816-69286857
14248	Abcb1a_01	Abcb1a	Abcb1a	XM_006503556.4,NM_011076.3	GRCm38.p6	chr5:8683384-8683419
14249	Abcb1b_01	Abcb1b	Abcb1b	NM_011075.2,XM_030254200.1	GRCm38.p6	chr5:8821317-8821354
14250	Abcb4_01	Abcb4	Abcb4	NM_008830.2,XM_006503553.2,XM_006503552.2,XM_006503554.4,XM_006503551.4	GRCm38.p6	chr5:8927775-8927812
14251	Abcb5_01	Abcb5	Abcb5	XM_017315245.2,NM_029961.2,XM_006516370.3	GRCm38.p6	chr12:118940648-118940693
14252	Abcb6_01	Abcb6	Abcb6	XM_006496552.3,NM_023732.3	GRCm38.p6	chr1:75177982-75178017
14253	Abcb7_01	Abcb7	Abcb7	NM_009592.1	GRCm38.p6	chrX:104301805-104301846
14254	Abcb8_01	Abcb8	Abcb8	XM_011249790.3,XM_006535812.1,NM_029020.3	GRCm38.p6	chr5:24407343-24407380
14255	Abcb9_01	Abcb9	Abcb9	XR_001784728.2,NM_019875.2,XM_017321012.1	GRCm38.p6	chr5:124083103-124083152
14256	Abcc1_01	Abcc1	Abcc1	XM_017316888.2,XR_003951767.1,XM_006521839.4,NM_008576.3	GRCm38.p6	chr16:14389841-14389882
14257	Abcc10_01	Abcc10	Abcc10	NM_145140.2,XR_876485.3,NM_001347396.1,XM_017317442.2,XR_385318.4,XR_001782068.2,XM_017317441.2,NM_170680.2	GRCm38.p6	chr17:46315520-46315554
14258	Abcc12_01	Abcc12	Abcc12	NM_172912.4,XM_006530984.4,XR_003947279.1,XR_003947278.1,XM_006530986.3,XM_006530985.4	GRCm38.p6	chr8:86528247-86528282
14259	Abcc2_01	Abcc2	Abcc2	XM_006526625.4,NM_013806.2	GRCm38.p6	chr19:43798152-43798193
14260	Abcc3_01	Abcc3	Abcc3	XR_879762.3,NM_001363187.1,NM_029600.4,NM_001363189.1	GRCm38.p6	chr11:94375674-94375709
14261	Abcc4_01	Abcc4	Abcc4	NM_001163675.1,XR_874344.3,XM_006519010.4,NM_001033336.3,NM_001163676.1	GRCm38.p6	chr14:118669069-118669106
14262	Abcc5_01	Abcc5	Abcc5	XM_006522213.4,XM_006522212.4,XR_384568.1,XR_384569.1,XM_017317029.2,XM_006522214.1,XM_006522215.2,XM_006522209.4,NM_176839.1,XM_030249145.1,XM_030249144.1,XR_001781832.2,XM_030249147.1,NM_013790.2,XM_030249146.1,XM_030249148.1,XM_006522208.4,XR_001781831.2,XR_001781835.2,XR_001781830.2,XR_001781834.2,XR_001781833.2,XR_001781836.2	GRCm38.p6	chr16:20405738-20405779
14263	Abcc6_01	Abcc6	Abcc6	NM_018795.2,XM_006540945.4,XR_391346.4,XM_006540946.4,XM_006540947.4,XM_006540949.4,XM_006540948.4	GRCm38.p6	chr7:46020545-46020580
14264	Abcc8_01	Abcc8	Abcc8	XR_001785502.1,XR_001785506.1,XR_882027.1,XR_001785512.1,XM_006540749.1,XR_003946427.1,XM_030242316.1,XR_882028.1,XR_001785505.1,NM_001357538.1,XR_001785504.1,NM_011510.3,XR_001785511.1	GRCm38.p6	chr7:46169921-46169968
14265	Abcc9_01	Abcc9	Abcc9	XM_006506952.3,XM_006506949.4,NM_011511.2,NM_021041.2,XM_006506948.4,XM_006506951.4,NM_001310143.1,NM_021042.2,XM_006506950.4,NM_001044720.1	GRCm38.p6	chr6:142689004-142689043
14266	Abcd1_01	Abcd1	Abcd1	NM_007435.2	GRCm38.p6	chrX:73717106-73717141
14267	Abcd2_01	Abcd2	Abcd2	NM_011994.3,NM_001358967.1	GRCm38.p6	chr15:91191376-91191413
14268	Abcd3_01	Abcd3	Abcd3	NM_001355756.1,NM_008991.3	GRCm38.p6	chr3:121779627-121779662
14269	Abcd4_01	Abcd4	Abcd4	XR_001780438.2,XM_030246618.1,XM_006515614.3,XR_003950000.1,XM_030246619.1,XR_003950001.1,XR_001780435.2,NM_008992.2,XR_003950002.1,XM_006515613.3,XM_006515616.3,XM_006515617.4	GRCm38.p6	chr12:84614010-84614044
14270	Abce1_01	Abce1	Abce1	NM_015751.2,NR_152614.1	GRCm38.p6	chr8:79690376-79690423
14271	Abcf1_01	Abcf1	Abcf1	NM_013854.1	GRCm38.p6	chr17:35961709-35961750
14272	Abcf2_01	Abcf2	Abcf2	NM_001359205.1,NM_001190443.1,NM_013853.2,XM_006535727.4	GRCm38.p6	chr5:24573740-24573775
14273	Abcf3_01	Abcf3	Abcf3	NM_013852.2,XR_001781829.2,XR_384567.4	GRCm38.p6	chr16:20549072-20549109
14274	Abcg1_01	Abcg1	Abcg1	NM_009593.2	GRCm38.p6	chr17:31111232-31111267
14275	Abcg2_01	Abcg2	Abcg2	NM_011920.3,XM_030255400.1,XM_011241362.1,XM_006506151.4,NM_001355477.1,XM_030255399.1,XM_030255402.1,XM_006506149.4,XM_006506150.4,XM_006506148.4	GRCm38.p6	chr6:58666883-58666922
14276	Abcg3_01	Abcg3	Abcg3	NM_030239.2,XM_017320905.1,XM_017320906.1,XM_017320904.1	GRCm38.p6	chr5:104974723-104974760
14277	Abcg4_01	Abcg4	Abcg4	NM_138955.3,XM_030244129.1,XM_011242421.3	GRCm38.p6	chr9:44279349-44279392
14278	Abcg5_01	Abcg5	Abcg5	NM_031884.2	GRCm38.p6	chr17:84682015-84682058
14279	Abcg8_01	Abcg8	Abcg8	NM_001286005.1,NM_001347418.1,NR_104382.1,NM_026180.3	GRCm38.p6	chr17:84686661-84686698
14280	Abhd1_01	Abhd1	Abhd1	NR_003522.1,NM_021304.3	GRCm38.p6	chr5:30950167-30950201
14281	Abhd10_01	Abhd10	Abhd10	XM_006521975.4,XM_011245865.3,NM_172511.4,XM_030249038.1,XM_006521976.4,NM_001272070.1,NR_073572.1	GRCm38.p6	chr16:45731774-45731815
14282	Abhd11_01	Abhd11	Abhd11	XM_006504492.4,NM_145215.2,NR_033794.1,XR_003955705.1,NM_001190437.1	GRCm38.p6	chr5:135009987-135010028
14283	Abhd12_01	Abhd12	Abhd12	NR_151505.1,XM_006500367.4,NM_001356550.1,NM_001356549.1,NM_024465.3,XM_006500365.4	GRCm38.p6	chr2:150835312-150835351
14284	Abhd12b_01	Abhd12b	Abhd12b	XM_030246486.1,NM_001195033.2	GRCm38.p6	chr12:70161480-70161514
14285	Abhd13_01	Abhd13	Abhd13	NM_026868.1,NM_001081119.1	GRCm38.p6	chr8:9987682-9987717
14286	Abhd14a_01	Abhd14a	Abhd14a	XM_017313551.2,XM_017313554.2,XM_006511805.4,XM_017313550.2,NM_001359225.2,NM_001374660.1,XM_017313555.2,XM_030244548.1,NM_001110272.2,XM_017313549.2,XM_006511796.4,XM_017313553.2,XM_011242910.3,XM_030244547.1,NM_001110271.2,XM_017313552.2,NM_001374659.1,XM_006511802.4,XM_030244549.1,XM_030244546.1,XM_006511803.4	GRCm38.p6	chr9:106440752-106440787
14287	Abhd14b_01	Abhd14b	Abhd14b	XM_030244698.1,NM_029631.3,XM_017313683.2,XM_006511848.4	GRCm38.p6	chr9:106450047-106450081
14288	Abhd15_01	Abhd15	Abhd15	NM_026185.4	GRCm38.p6	chr11:77518663-77518700
14289	Abhd16a_01	Abhd16a	Abhd16a	XR_001782059.2,NM_178592.3,XR_385303.4,XM_030249600.1	GRCm38.p6	chr17:35090370-35090405
14290	Abhd16b_01	Abhd16b	Abhd16b	NM_183181.2	GRCm38.p6	chr2:181493760-181493801
14291	Abhd17a_01	Abhd17a	Abhd17a	XM_017313894.2,XM_006513504.2,XM_030245023.1,NM_145421.2	GRCm38.p6	chr10:80586572-80586606
14292	Abhd17b_01	Abhd17b	Abhd17b	NM_146096.3,XM_011247228.3	GRCm38.p6	chr19:21678733-21678768
14293	Abhd17c_01	Abhd17c	Abhd17c	NM_133722.2	GRCm38.p6	chr7:84151415-84151449
14294	Abhd18_01	Abhd18	Abhd18	XM_006500780.4,NM_026622.3,NM_026622.4,NM_001377112.1,XM_017319591.2,XM_017319592.2,NR_165084.1,XM_030252629.1,NM_001377110.1,XR_001783694.2,NM_001377111.1,XM_006500779.3	GRCm38.p6	chr3:40933574-40933609
14295	Abhd2_01	Abhd2	Abhd2	NM_018811.6	GRCm38.p6	chr7:79325437-79325472
14296	Abhd3_01	Abhd3	Abhd3	XM_011246794.3,XM_011246793.3,NM_134130.1,XR_385966.4	GRCm38.p6	chr18:10704641-10704676
14297	Abhd4_01	Abhd4	Abhd4	XM_006518367.3,NM_001205181.1,NM_134076.3	GRCm38.p6	chr14:54262659-54262698
14298	Abhd5_01	Abhd5	Abhd5	NM_001359207.1,NR_152865.1,XM_030244526.1,NM_026179.2	GRCm38.p6	chr9:122377864-122377905
14299	Abhd6_01	Abhd6	Abhd6	NM_025341.4,NM_001331065.1,NM_001331064.1,XM_006518073.3	GRCm38.p6	chr14:8039839-8039880
14300	Abhd8_01	Abhd8	Abhd8	XM_030243705.1,NM_022419.3	GRCm38.p6	chr8:71461404-71461439
14301	Abi1_01	Abi1	Abi1	XM_006497619.2,NM_001331043.1,NM_001377511.1,NM_001077193.3,NM_001077192.3,NM_001331045.1,XM_030246741.1,NM_001377512.1,NM_001377513.1,NM_001331044.1,NM_001077190.3,NM_007380.4,NM_145994.3,NM_001377510.1	GRCm38.p6	chr2:22941919-22941956
14302	Abi2_01	Abi2	Abi2	XM_006496075.4,NM_001198570.1,XM_030255012.1,NM_001198571.1,XM_030255013.1,XM_006496078.4,XM_006496077.4,XM_006496076.4,XM_017321240.2,XM_017321246.2,XM_006496079.4,XM_017321247.2,XM_030255022.1,XM_030255016.1,XM_030255021.1,XM_030255020.1,XM_011238539.3,XM_017321244.2,XM_006496085.4,XM_017321249.2,XM_030255006.1,XM_006496084.4,NM_198127.2,XM_006496080.4,XM_006496081.4	GRCm38.p6	chr1:60437121-60437158
14303	Abi3_01	Abi3	Abi3	XM_030246228.1,NM_025659.4,XM_030246227.1,XM_006533956.3,XM_017314707.1,XM_030246226.1,XM_017314709.2,XM_017314710.2,NM_001163464.1,XM_030246225.1,XM_030246224.1,XM_030246229.1,XM_017314708.1	GRCm38.p6	chr11:95835919-95835954
14304	Abi3bp_01	Abi3bp	Abi3bp	XM_006522278.1,XM_006522279.3,XM_006522276.3,XM_006522251.1,XM_006522277.3,XM_006522274.1,XM_030249156.1,XM_006522252.1,XM_006522256.2,XM_006522275.1,XM_006522270.1,XM_006522257.3,XM_006522271.2,XM_006522262.1,NM_001014422.2,XM_006522286.3,NM_001014423.2,XM_006522254.2,XM_006522273.1,XM_006522258.1,XM_006522255.3,XM_006522259.1,XM_006522265.1,XM_006522264.1,XM_006522285.1,XM_006522281.2,NM_001014…	GRCm38.p6	chr16:56562432-56562467
14305	Abitram_01	Abitram	Abitram	NM_001081420.1,XM_011250006.3	GRCm38.p6	chr4:56802679-56802715
14306	Abl1_01	Abl1	Abl1	NM_001283045.1,NM_001283047.1,XM_006497621.4,NM_001283046.1,NM_009594.4,NM_001112703.2	GRCm38.p6	chr2:31794556-31794591
14307	Abl2_01	Abl2	Abl2	XM_006496621.4,NM_001136104.1,XM_006496614.4,XM_006496615.4,XM_006496620.4,XM_011238738.3,XM_006496617.4,NM_009595.3,XM_006496616.4,XM_006496613.4,XM_011238737.3,XM_006496622.4	GRCm38.p6	chr1:156625294-156625329
14308	Ablim1_01	Ablim1	Ablim1	XM_030250915.1,XM_030250918.1,XM_006527034.4,XM_006527035.4,XM_030250916.1,XM_006527040.4,NM_001290816.2,XM_030250913.1,XM_006527038.4,NM_001362446.1,NM_001290815.2,XM_006527044.4,XM_006527041.4,NM_178688.4,XM_006527039.4,XM_017318184.2,XM_006527033.4,NM_001347459.1,XM_017318186.2,XM_006527048.4,XM_017318183.1,XM_030250919.1,XM_017318182.2,XM_017318173.2,XM_017318181.2,NM_001362445.1,NM_001290813…	GRCm38.p6	chr19:57068143-57068186
14309	Ablim2_01	Ablim2	Ablim2	XM_006503919.1,XM_006503926.3,NM_177678.7,XM_030254380.1,NM_001177700.1,XM_030254383.1,XM_006503912.1,XM_006503913.1,XM_006503924.1,XM_006503910.1,XM_006503911.1,XM_006503914.1,XM_006503915.1,XM_006503923.1,XM_030254382.1,NM_001177699.1,XM_006503922.1,NM_001177697.1,NM_001177698.1,NM_001177696.1,XM_006503916.1,XM_006503917.1,XM_006503925.3,XM_030254381.1,XM_006503909.1,XM_030254384.1,XM_006503920…	GRCm38.p6	chr5:35824038-35824072
14310	Ablim3_01	Ablim3	Ablim3	XM_030250508.1,NM_001360868.1,XM_006526008.4,XM_006526010.4,XM_030250507.1,XM_006526006.4,XM_030250506.1,XM_006526007.4,NM_001164491.1,XM_006526012.2,XM_006526009.4,NM_198649.3,XM_006526005.4	GRCm38.p6	chr18:61823868-61823904
14311	Abo_01	Abo	Abo	XM_006498458.4,NM_030718.5,NM_001290444.1,XM_006498456.4	GRCm38.p6	chr2:26843686-26843721
14312	Abr_01	Abr	Abr	NM_198894.2,XM_030245469.1,XR_003949222.1,XR_003949223.1,NM_001291186.1,XM_030245470.1,NM_198895.2,NM_198018.2,XR_003949224.1,NM_001346670.1,NM_001363379.1	GRCm38.p6	chr11:76425267-76425303
14313	Abra_01	Abra	Abra	NM_175456.4	GRCm38.p6	chr15:41869260-41869297
14314	Abracl_01	Abracl	Abracl	NM_028440.1,NM_001359559.1,NM_001359560.1	GRCm38.p6	chr10:18011735-18011776
14315	Abraxas1_01	Abraxas1	Abraxas1	XR_389290.4,XR_001784743.2,XM_006535217.4,XM_006535218.2,XR_001784744.2,XM_030254801.1,NM_172405.3,XR_003955708.1	GRCm38.p6	chr5:100806272-100806307
14316	Abraxas2_01	Abraxas2	Abraxas2	NM_198017.3	GRCm38.p6	chr7:132883048-132883083
14317	Abt1_01	Abt1	Abt1	NM_013924.3	GRCm38.p6	chr13:23422268-23422302
14318	Abtb1_01	Abtb1	Abtb1	XM_030255680.1,NR_155424.1,XM_006506792.4,NM_001362152.1,XM_006506793.4,XR_003956266.1,XM_006506791.3,NM_030251.3,XM_030255681.1	GRCm38.p6	chr6:88839684-88839718
14319	Abtb2_01	Abtb2	Abtb2	NM_178890.3	GRCm38.p6	chr2:103683400-103683435
14320	Acaa1a_01	Acaa1a	Acaa1a	XM_030244019.1,XM_006511923.2,NM_130864.3,NM_001357516.1,XM_030244018.1	GRCm38.p6	chr9:119342723-119342757
14321	Acaa1b_01	Acaa1b	Acaa1b	XM_006512114.2,XM_011242970.1,XM_006512116.4,NM_146230.3	GRCm38.p6	chr9:119155768-119155802
14322	Acaa2_01	Acaa2	Acaa2	NM_177470.3	GRCm38.p6	chr18:74787222-74787257
14323	Acaca_01	Acaca	Acaca	XM_006531954.2,XM_006531957.4,XM_030245463.1,XM_011248666.2,XM_011248667.2,XM_006531953.2,XM_006531956.2,XM_030245462.1,NM_133360.2,XM_006531955.2,XM_030245461.1	GRCm38.p6	chr11:84214163-84214198
14324	Acacb_01	Acacb	Acacb	XM_006530114.4,XM_006530112.3,XM_006530113.3,NM_133904.2,XM_006530111.3	GRCm38.p6	chr5:114195687-114195722
14325	Acad10_01	Acad10	Acad10	XM_006530460.4,XM_006530459.2,XM_030254817.1,XM_006530461.4,XM_006530458.4,NM_028037.4,XM_030254818.1,XM_006530462.1,XM_006530463.2	GRCm38.p6	chr5:121630195-121630229
14326	Acad11_01	Acad11	Acad11	NM_175324.4	GRCm38.p6	chr9:104063860-104063901
14327	Acad12_01	Acad12	Acad12	XM_011248231.1,NM_178799.3	GRCm38.p6	chr5:121604300-121604334
14328	Acad8_01	Acad8	Acad8	XM_030244510.1,XR_870536.3,NM_025862.2,XM_006510550.4,XM_030244509.1,XR_001778975.2,XR_003947975.1,XR_001778977.1	GRCm38.p6	chr9:26979018-26979053
14329	Acad9_01	Acad9	Acad9	NM_172678.4,XR_003954304.1	GRCm38.p6	chr3:36075988-36076023
14330	Acadl_01	Acadl	Acadl	NM_007381.4	GRCm38.p6	chr1:66838310-66838345
14331	Acadm_01	Acadm	Acadm	NM_007382.5	GRCm38.p6	chr3:153939118-153939155
14332	Acads_01	Acads	Acads	NM_007383.3	GRCm38.p6	chr5:115117666-115117703
14333	Acadsb_01	Acadsb	Acadsb	XR_003946541.1,NM_025826.4	GRCm38.p6	chr7:131424504-131424547
14334	Acadvl_01	Acadvl	Acadvl	NM_017366.3	GRCm38.p6	chr11:70013478-70013521
14335	Acan_01	Acan	Acan	NM_007424.3,NM_001361500.1	GRCm38.p6	chr7:79084741-79084776
14336	Acap1_01	Acap1	Acap1	XM_030245827.1,XM_017314457.2,NM_153788.3	GRCm38.p6	chr11:69889237-69889272
14337	Acap2_01	Acap2	Acap2	XM_017317164.2,XM_006522744.4,XR_384614.4,XM_017317162.2,XM_006522746.4,XM_006522749.4,XM_006522748.4,XM_006522743.4,XM_017317163.2,XR_384613.4,XM_006522747.4,NM_030138.2	GRCm38.p6	chr16:31127359-31127394
14338	Acap3_01	Acap3	Acap3	NM_207223.1,XM_006538541.4,XM_006538542.2	GRCm38.p6	chr4:155900287-155900322
14339	Acat1_01	Acat1	Acat1	NM_144784.3	GRCm38.p6	chr9:53592047-53592082
14340	Acat2_01	Acat2	Acat2	NM_009338.3	GRCm38.p6	chr17:12944428-12944465
14341	Acat3_01	Acat3	Acat3	XM_030249675.1,NM_153151.3	GRCm38.p6	chr17:12925290-12925328
14342	Acbd3_01	Acbd3	Acbd3	NM_133225.3	GRCm38.p6	chr1:180733215-180733258
14343	Acbd4_01	Acbd4	Acbd4	NM_025988.2	GRCm38.p6	chr11:103103911-103103946
14344	Acbd5_01	Acbd5	Acbd5	NM_001102437.1,NM_001102436.1,XM_030252128.1,NM_028793.3,NM_001102438.1,NM_001355639.1,NM_001355637.1,XM_030252127.1,NM_001355641.1,XM_030252126.1,XM_030252129.1,XM_006498385.4,NM_001355638.1,NR_149742.1,NM_001355642.1	GRCm38.p6	chr2:23090581-23094332,chr2:23094297-23094332
14345	Acbd6_01	Acbd6	Acbd6	NM_001145781.1,NM_026683.1,XR_387197.4,NM_028250.3	GRCm38.p6	chr1:155558824-155558858
14346	Acbd7_01	Acbd7	Acbd7	NM_030063.2,XM_030252244.1	GRCm38.p6	chr2:3340396-3340430
14347	Accs_01	Accs	Accs	XM_006499761.3,NM_001290782.1,XM_006499760.3,XM_011239625.2,XM_030251804.1,NM_183220.3,XM_006499764.2,XM_006499768.3,XM_006499765.2,XM_006499763.2,XM_011239623.1,XM_030251803.1,XM_030251802.1,XM_006499766.2,XR_374480.4	GRCm38.p6	chr2:93841871-93841906
14348	Accsl_01	Accsl	Accsl	NM_001363093.1,XM_011239645.3,NM_001363092.1,NM_001033452.4	GRCm38.p6	chr2:93864406-93864443
14349	Acd_01	Acd	Acd	NM_001012638.2,XM_006531174.4,XM_006531170.3,XM_006531169.3,NM_001348349.1,XM_030243661.1,XM_011248435.3,NR_145825.1,NR_145824.1,XM_006531175.3	GRCm38.p6	chr8:105700950-105700987
14350	Ace_01	Ace	Ace	NM_207624.6,NM_001281819.2,NM_009598.3	GRCm38.p6	chr11:105981840-105981877
14351	Ace2_01	Ace2	Ace2	NM_027286.4,NM_001130513.1	GRCm38.p6	chrX:164153125-164153160
14352	Ace3_01	Ace3	Ace3	XM_006533054.4,XM_006533060.4,XM_006533059.4,XM_006533056.4,XM_006533058.4,XM_030245888.1,XM_030245887.1,XM_030245889.1,XM_006533053.4,NM_001101453.3	GRCm38.p6	chr11:105997957-105997992
14353	Acer1_01	Acer1	Acer1	NM_175731.4	GRCm38.p6	chr17:56958988-56959031
14354	Acer2_01	Acer2	Acer2	NM_001290543.1,NM_139306.3,XM_011250012.3,XM_006537878.4,NM_001290541.1,XM_006537877.4	GRCm38.p6	chr4:86886218-86886257
14355	Acer3_01	Acer3	Acer3	NR_153759.1,NM_001360615.1,XM_030242889.1,NM_001360616.1,NM_001360617.1,NM_025408.3	GRCm38.p6	chr7:98266172-98266221
14356	Ache_01	Ache	Ache	XR_001784593.2,XM_006504548.4,XM_017320605.2,XM_006504547.4,NM_009599.4,NM_001290010.1	GRCm38.p6	chr5:137290546-137290583
14357	Acin1_01	Acin1	Acin1	XM_006519296.2,NM_023190.3,XM_006519297.2,XR_003950873.1,XR_003950872.1,XM_030247896.1,XR_003950868.1,XR_003950869.1,XM_006519308.4,NM_001374770.1,XM_006519298.4,NM_001242605.1,XR_003950867.1,XM_030247893.1,NM_001242606.1,NM_001085472.2,XM_006519304.4,XM_030247895.1,XM_030247894.1,NM_019567.3,XM_006519301.2,XR_003950876.1,NM_001085473.2,XR_003950875.1,XR_003950874.1,XR_003950871.1,XR_003950870.1	GRCm38.p6	chr14:54644212-54644247
14358	Ackr1_01	Ackr1	Ackr1,Cadm3	XM_006497060.4,NM_010045.2,XM_030243803.1	GRCm38.p6	chr1:173332825-173332865
14359	Ackr2_01	Ackr2	Ackr2	NM_021609.4,XM_006512204.3,NM_001276719.1,XM_006512203.4	GRCm38.p6	chr9:121908953-121908990
14360	Ackr3_01	Ackr3	Ackr3	NM_001271607.1,NM_007722.4	GRCm38.p6	chr1:90213824-90213859
14361	Ackr4_01	Ackr4	Ackr4	NM_145700.2,XM_006511735.4	GRCm38.p6	chr9:104099451-104099496
14362	Acly_01	Acly	Acly	NM_134037.3,NM_001199296.1	GRCm38.p6	chr11:100514972-100515007
14363	Acmsd_01	Acmsd	Acmsd	NM_001033041.2	GRCm38.p6	chr1:127749121-127749162
14364	Acnat1_01	Acnat1	Acnat1	XM_011250002.3,XM_006537839.4,NM_001164565.1,XM_006537840.4,XM_006537843.4,XM_030253418.1,XM_011250000.3,XM_011250005.3,XM_011250004.3,XM_011250003.3,XM_006537842.4	GRCm38.p6	chr4:49447735-49447769
14365	Acnat2_01	Acnat2	Acnat2	NM_145368.3,XM_011249969.3,NM_001356289.1	GRCm38.p6	chr4:49381805-49381854
14366	Aco1_01	Aco1	Aco1	NM_007386.2	GRCm38.p6	chr4:40164727-40164766
14367	Aco2_01	Aco2	Aco2	NM_080633.2	GRCm38.p6	chr15:81895296-81895331
14368	Acod1_01	Acod1	Acod1	NM_008392.1	GRCm38.p6	chr14:103049648-103049697
33634	Acot10_01	Acot10	Acot10	NM_022816.2	GRCm38.p6	chr15:20666716-20666750
14370	Acot11_01	Acot11	Acot11	NM_001347159.1,NM_025590.4,XM_011240556.2	GRCm38.p6	chr4:106761967-106762004
14371	Acot12_01	Acot12	Acot12	XM_006517413.4,NM_028790.3	GRCm38.p6	chr13:91759963-91760000
14372	Acot13_01	Acot13	Acot13	NM_025790.2	GRCm38.p6	chr13:24831265-24831299
14373	Acot3_01	Acot3	Acot3	NM_134246.3,NM_001346701.1	GRCm38.p6	chr12:84058839-84058880
14374	Acot4_01	Acot4	Acot6,Acot4,Acot2,Acot1	XM_017314967.2,NM_012006.2,NM_134188.3,NM_134247.3,NM_172580.1,XR_003949990.1	GRCm38.p6	chr12:84101014-84101048,chr12:83988067-83988101,chr12:84009552-84009586,chr12:84038553-84038587
14375	Acot7_01	Acot7	Acot7	NM_001369274.1,XM_030253768.1,NM_001369275.1,XM_030253769.1,XM_030253767.1,NM_001146057.2,XM_006539169.2,NM_001369273.1,NM_001369276.1,NM_133348.2,NM_001146058.1	GRCm38.p6	chr4:152253224-152253265
14376	Acot8_01	Acot8	Acot8	XM_011239318.3,XM_011239319.2,NM_001362756.1,XR_001781109.2,NM_001362757.1,NM_133240.2,XM_006498831.4,XM_006498829.2	GRCm38.p6	chr2:164799905-164799939
14377	Acox1_01	Acox1	Acox1	XM_006532002.4,NM_001377521.1,NM_001377522.1,NM_015729.3,NM_001271898.1	GRCm38.p6	chr11:116198308-116198349
14378	Acox2_01	Acox2	Acox2	XM_006518108.4,NM_053115.2,NM_001161667.1	GRCm38.p6	chr14:8255736-8255771
14379	Acox3_01	Acox3	Acox3	NM_001357018.1,XM_006504200.4,XM_017321179.2,NM_001357020.1,NM_030721.3,XM_006504196.4,XM_006504199.4,XM_006504197.4,XM_011240801.3,XM_030254924.1,NM_001357019.1,XM_006504201.1	GRCm38.p6	chr5:35605245-35605280
14380	Acoxl_01	Acoxl	Acoxl	XM_011239808.1,NM_028765.3,XM_006500273.2	GRCm38.p6	chr2:128122982-128123021
14381	Acp1_01	Acp1	Acp1	NM_021330.4,NM_001110239.1,XR_381176.4	GRCm38.p6	chr12:30896158-30896192
14382	Acp2_01	Acp2	Acp2	NM_007387.2,NM_001357067.1,XM_011239257.3,XR_003950055.1	GRCm38.p6	chr2:91205760-91205799
14383	Acp4_01	Acp4	Acp4	XM_030241931.1,XR_003946367.1,XM_011250772.3,XM_006540530.4,XM_017321901.2,XM_006540531.4,NM_001195034.1,XM_017321902.2	GRCm38.p6	chr7:44255208-44255245
14384	Acp5_01	Acp5	Acp5	XM_006509944.3,XM_030244022.1,XM_011242384.2,NM_001102404.1,XM_030244020.1,NM_001102405.1,XM_006509946.2,NM_007388.3,XM_006509945.3	GRCm38.p6	chr9:22129551-22129590
14385	Acp6_01	Acp6	Acp6	XR_375566.4,NM_019800.4,XR_003954368.1	GRCm38.p6	chr3:97165917-97165954
14386	Acp7_01	Acp7	Acp7	XM_006539450.2,NM_175319.5,XM_006539449.4,XM_030241951.1,XM_006539447.4	GRCm38.p6	chr7:28615408-28615445
14387	Acpp_01	Acpp	Acpp	NM_019807.2,NM_207668.2	GRCm38.p6	chr9:104324131-104324168
14388	Acr_01	Acr	Acr	NM_001205049.1,XM_030248276.1,XM_030248277.1,NM_001277247.1,NM_001277246.1,XM_006520300.4,NM_013455.3,NM_001277245.1,XM_006520299.4	GRCm38.p6	chr15:89569868-89569903
14389	Acrbp_01	Acrbp	Acrbp	NM_001127340.1,NM_016845.2	GRCm38.p6	chr6:125050485-125050519
14390	Acrv1_01	Acrv1	Acrv1	NM_007391.3,XM_030244023.1	GRCm38.p6	chr9:36694255-36694304
14391	Acsbg1_01	Acsbg1	Acsbg1	NM_053178.2,XM_006511588.3,XM_030244753.1	GRCm38.p6	chr9:54642642-54642679
14392	Acsbg2_01	Acsbg2	Acsbg2	XM_011246503.2,NM_001039114.1,XR_003952138.1,XM_006524444.2,XM_006524443.4,XR_001782082.2,XR_003952137.1	GRCm38.p6	chr17:56850061-56850096
14393	Acsbg3_01	Acsbg3	Acsbg3	XR_385396.4,XR_385395.3,NM_030141.2,XM_006525141.3	GRCm38.p6	chr17:56877475-56877512
14394	Acsf2_01	Acsf2	Acsf2	XR_003949445.1,NM_153807.2	GRCm38.p6	chr11:94573044-94573079
14395	Acsf3_01	Acsf3	Acsf3	XM_030243568.1,XM_030243570.1,XR_003947283.1,XR_003947284.1,XM_006531030.2,XM_006531032.3,NM_144932.4,XM_030243569.1	GRCm38.p6	chr8:122781451-122781490
14396	Acsl1_01	Acsl1	Acsl1	NM_007981.4,XM_030243285.1,XM_006509265.3,XM_017312563.2,NM_001302163.1,XM_006509264.4,XM_006509262.3,XM_006509266.3	GRCm38.p6	chr8:46505708-46505747
14397	Acsl3_01	Acsl3	Acsl3	NM_001136222.1,NM_028817.3,NM_001033606.2	GRCm38.p6	chr1:78690272-78690307
14398	Acsl4_01	Acsl4	Acsl4	NM_207625.2,XM_030251379.1,NM_019477.3,XM_011247843.3,XM_011247842.3,NM_001033600.1	GRCm38.p6	chrX:142351522-142351563
14399	Acsl5_01	Acsl5	Acsl5	NM_027976.2,XM_006527178.3	GRCm38.p6	chr19:55278088-55278127
14400	Acsl6_01	Acsl6	Acsl6	NM_144823.4,XM_030245801.1,XR_003949381.1,XM_006532843.1,NM_001033599.1,XM_017314444.1,NM_001033598.1,XM_006532844.1,XM_030245802.1,NM_001033597.1,XM_006532845.2	GRCm38.p6	chr11:54323275-54323318
14401	Acsm1_01	Acsm1	Acsm1	NM_054094.6,XM_006507214.4	GRCm38.p6	chr7:119622527-119622568
14402	Acsm2_01	Acsm2	Acsm2	NM_146197.4,NM_001177977.1,NM_001177978.1	GRCm38.p6	chr7:119563633-119563672
14403	Acsm3_01	Acsm3	Acsm3	XM_017322061.2,XM_017322060.1,NM_212441.2,NM_016870.3,XM_006507475.3,XM_017322063.1,XM_017322062.1,NM_212442.2	GRCm38.p6	chr7:119767957-119768004
14404	Acsm4_01	Acsm4	Acsm4	NM_178414.3	GRCm38.p6	chr7:119693661-119693700
14405	Acsm5_01	Acsm5	Acsm5	XM_006507905.2,XM_011241825.3,NM_178758.3,XM_006507904.2	GRCm38.p6	chr7:119537206-119537245
14406	Acss1_01	Acss1	Acss1	NM_080575.2	GRCm38.p6	chr2:150667947-150667988
14407	Acss2_01	Acss2	Acss2	NM_019811.3	GRCm38.p6	chr2:155549498-155549535
14408	Acss3_01	Acss3	Acss3	NM_198636.4,XM_030245151.1,NM_001142804.2	GRCm38.p6	chr10:107053437-107053472
33635	Acta1_01	Acta1	Acta1	NM_001272041.1,NM_009606.3	GRCm38.p6	chr8:123892329-123892363
33636	Acta2_01	Acta2	Acta2	XM_006526606.2,NM_007392.3	GRCm38.p6	chr19:34246192-34246226
14411	Actb_01	Actb	Actb	XM_030254057.1,NM_007393.5	GRCm38.p6	chr5:142905601-142905635
14412	Actbl2_01	Actbl2	Actbl2	NM_175497.3	GRCm38.p6	chr13:111255322-111255365
14413	Actc1_01	Actc1	Actc1	NM_009608.4	GRCm38.p6	chr2:114049522-114049559
14414	Acte1_01	Acte1	Acte1	XM_006508671.2,XM_006508666.1,NM_001369834.1,NM_001369835.1,XM_030241965.1,XM_006508669.4,XM_030241964.1,XM_006508672.3,NM_001369836.1,NM_001369837.1,XM_030241967.1,XM_030241966.1	GRCm38.p6	chr7:143891689-143891736
14415	Actg1_01	Actg1	Actg1	NM_009609.3,NM_001313923.1	GRCm38.p6	chr11:120348051-120348088
14416	Actg2_01	Actg2	Actg2	NM_009610.2	GRCm38.p6	chr6:83526852-83526886
14417	Actl10_01	Actl10	Actl10	NM_001171640.1	GRCm38.p6	chr2:154552681-154552724
14418	Actl11_01	Actl11	Actl11	NM_026338.3	GRCm38.p6	chr9:107928746-107928783
14419	Actl6a_01	Actl6a	Actl6a	NM_019673.2,XM_006535503.4	GRCm38.p6	chr3:32711885-32711928
14420	Actl6b_01	Actl6b	Actl6b	XM_030254941.1,XM_030254945.1,XM_030254942.1,XM_030254944.1,XM_006504639.4,XM_006504635.3,XM_030254940.1,NM_031404.5,XM_017321187.2,XM_006504637.4,XM_030254946.1,XM_030254943.1,XM_006504636.4,XM_006504638.4,XM_030254939.1,XM_006504640.4	GRCm38.p6	chr5:137563150-137563193
14421	Actl7a_01	Actl7a	Actl7a	NM_009611.3	GRCm38.p6	chr4:56744060-56744095
14422	Actl7b_01	Actl7b	Actl7b	NM_025271.2	GRCm38.p6	chr4:56740612-56740647
14423	Actl9_01	Actl9	Actl9	NM_183282.2	GRCm38.p6	chr17:33433043-33433078
14424	Actn1_01	Actn1	Actn1	XM_006515389.2,XM_006515386.2,XM_030246514.1,XM_006515387.4,NM_001346669.1,NM_134156.2,XM_030246513.1,XM_006515384.2,XM_006515385.2	GRCm38.p6	chr12:80196973-80197010
14425	Actn2_01	Actn2	Actn2	XM_011244263.3,NM_033268.4	GRCm38.p6	chr13:12282581-12282618
14426	Actn3_01	Actn3	Actn3	NM_013456.2	GRCm38.p6	chr19:4867553-4867588
14427	Actn4_01	Actn4	Actn4	XM_006540255.4,NM_021895.3,NM_001360550.1,XM_006540257.3,NM_001360549.1,NM_001360548.1	GRCm38.p6	chr7:28919005-28919042
14428	Actr10_01	Actr10	Actr10	NM_019785.2	GRCm38.p6	chr12:70937991-70938026
14429	Actr1a_01	Actr1a	Actr1a	NM_016860.2,NM_001365070.1	GRCm38.p6	chr19:46380926-46380971
14430	Actr1b_01	Actr1b	Actr1b	XM_011238485.3,NM_146107.2,XM_011238486.3,XM_011238484.2	GRCm38.p6	chr1:36701478-36701513
14431	Actr2_01	Actr2	Actr2	NM_001362899.1,NM_146243.2	GRCm38.p6	chr11:20080732-20080773
14432	Actr3_01	Actr3	Actr3	NM_001205386.1,NM_023735.2,NM_001205385.1	GRCm38.p6	chr1:125403453-125403488
14433	Actr3b_01	Actr3b	Actr3b	NM_001310504.1,XM_011249768.3,XM_017320880.2,XM_030254498.1,NM_001004365.2,XM_006535713.4	GRCm38.p6	chr5:25832389-25832434
14434	Actr5_01	Actr5	Actr5	XM_017314917.2,XR_001780405.2,NM_175419.4,XR_003950026.1,XR_003950027.1,XR_001780406.2,XR_374386.4,XM_006498566.2,XR_003950024.1,XR_866206.3	GRCm38.p6	chr2:158631474-158631509
14435	Actr6_01	Actr6	Actr6	XM_006513965.2,XM_011243532.3,NM_001359468.1,XM_006513966.4,NM_001359469.1,XM_030245223.1,XM_030245224.1,NM_025914.3,XM_006513967.4	GRCm38.p6	chr10:89732182-89732217
14436	Actr8_01	Actr8	Actr8	XM_030247897.1,XM_030247898.1,NM_027493.3,XM_030247899.1,XM_006519309.4	GRCm38.p6	chr14:29985941-29985978
14437	Actrt1_01	Actrt1	Actrt1	NM_028514.3	GRCm38.p6	chrX:46329189-46329232
14438	Actrt2_01	Actrt2	Actrt2	NM_028513.3	GRCm38.p6	chr4:154666920-154666959
14439	Actrt3_01	Actrt3	Actrt3	NM_029690.2	GRCm38.p6	chr3:30598451-30598492
14440	Acvr1_01	Acvr1	Acvr1	XM_006497622.4,NM_007394.3,NM_001355048.1,NM_001355049.1,NM_001110205.1,NM_001110204.1	GRCm38.p6	chr2:58477679-58477718
14441	Acvr1b_01	Acvr1b	Acvr1b	NM_007395.4	GRCm38.p6	chr15:101194907-101194954
14442	Acvr1c_01	Acvr1c	Acvr1c	XM_006498086.4,NM_001033369.3,XR_374097.4,NM_001111030.1,XM_006498085.4,XM_011239108.2	GRCm38.p6	chr2:58315885-58315924
14443	Acvr2a_01	Acvr2a	Acvr2a	NM_007396.4,XM_006497623.4	GRCm38.p6	chr2:48873434-48873471
14444	Acvr2b_01	Acvr2b	Acvr2b	NM_007397.3,XR_379846.4,NM_001313757.1,XM_006511926.4,XM_030244026.1	GRCm38.p6	chr9:119429909-119429952
14445	Acvrl1_01	Acvrl1	Acvrl1	NM_009612.3,NM_001277259.1,NM_001277257.1,NM_001277255.1,NM_001277258.1	GRCm38.p6	chr15:101137079-101137114
14446	Acy1_01	Acy1	Acy1	NM_025371.3,NM_001276442.1	GRCm38.p6	chr9:106434685-106434724
14447	Acy3_01	Acy3	Acy3	NM_001302481.1,NM_001302479.1,NM_001302480.1,NM_001302482.1	GRCm38.p6	chr19:3988606-3988643
14448	Acyp1_01	Acyp1	Acyp1	NM_001364361.1,NM_025421.3,NM_001364360.1	GRCm38.p6	chr12:85280012-85280061
14449	Acyp2_01	Acyp2	Acyp2	NM_029344.3,XM_017314816.2	GRCm38.p6	chr11:30632281-30632315
14450	Ada_01	Ada	Ada	NM_001272052.1,NM_007398.4	GRCm38.p6	chr2:163732945-163732980
14451	Adad1_01	Adad1	Adad1	NM_009350.3	GRCm38.p6	chr3:37065162-37065197
14452	Adad2_01	Adad2	Adad2	NM_029428.2,XM_006531464.2,XM_006531467.2	GRCm38.p6	chr8:119614098-119614132
14453	Adal_01	Adal	Adal	XM_006500351.3,XM_030252178.1,XM_006500359.3,XM_030252179.1,XM_011239837.2,XM_030252183.1,XM_030252180.1,XM_030252182.1,NM_001290811.1,NM_001290812.1,XM_006500353.4,XM_006500352.3,NM_001355748.1,XM_006500360.3,NM_029475.2,XM_030252181.1	GRCm38.p6	chr2:121150250-121150284
[truncated: 19,529 more rows]
