# Supplementary material for: Spatially resolved whole transcriptome profiling in human and mouse tissue using Digital Spatial Profiling
Source: HighWire-hosted journal article supplement (doi:10.1101/gr.276206.121), 2022-09-13
Supplement: Supplemental_Table_2.xlsx [file Supplemental_Table_2.xlsx]

## Sheet: README
Supplemental Table 2. Antibodies and RNAscope probes used in this study.
Target, vendor, clone, catalog number, fluorophore and/or channel used, and the experiment in which each was used for each antibody or RNAscope probe.

## Sheet: Antibodies
Target	Clone	Fluorophore	Company	Catalog Number	Tissue
WT1	6F-H2	AF647	Novus Biologicals	NB110-60011	human kidney
PanCK	AE1 + AE3	AF532	Novus Biologicals	NBP2-33200	human kidney, human CPA, mouse CPA, mouse organ array, human CRC+NSCLC, human tonsil
PTPRC	2B11 + PD7/26	AF594	Novus Biologicals	NBP2-34528	human kidney, human CPA, human CRC+NSCLC, human tonsil
PTPRC	EM-05	AF594	Novus Biologicals	NBP2-34528	mouse CPA, mouse organ array
CD3E	UMAB54	AF647	Origene	UM500048	human CRC+NSCLC
CD20	IGEL/773	AF647	Novus Biologicals	NBP2-47840AF647	human CPA
p63	D-9	AF647	Santa Cruz Biotechnology	sc-25268	mouse embryo
beta3 tubulin	2G10	AF594	Santa Cruz Biotechnology	sc-80005	mouse embryo

## Sheet: RNAscope Probes
Probe	Channel	ACD Catalog #
RNAscope 2.5 LS Probe Hs-ARG1	C2	401588-C2
RNAscope 2.5 LS Probe Hs-CD27	C2	415458-C2
RNAscope 2.5 LS Probe Hs-CD274	C1	600868
RNAscope 2.5 LS Probe Hs-CD3E	C2	553978-C2
RNAscope 2.5 LS Probe Hs-CD4	C2	605608-C2
RNAscope 2.5 LS Probe Hs-CD4	C1	605608
RNAscope 2.5 LS Probe Hs-CD40	C1	578478
RNAscope 2.5 LS Probe Hs-CD44	C2	311278-C2
RNAscope 2.5 LS Probe Hs-CD68	C2	560598-C2
RNAscope 2.5 LS Probe Hs-CD8A	C1	560398
RNAscope 2.5 LS Probe Hs-CTLA4	C2	554348-C2
RNAscope 2.5 LS Probe Hs-DKK1	C1	421418
RNAscope 2.5 LS Probe Hs-DKK2	C1	531138
RNAscope 2.5 LS Probe Hs-FOXP3	C1	418478
RNAscope 2.5 LS Probe Hs-FOXP3	C2	418478-C2
RNAscope 2.5 LS Probe Hs-GZMB	C2	445978
RNAscope 2.5 LS Probe Hs-HIF1A	C2	605228-C2
RNAscope 2.5 LS Probe Hs-IDO1	C1	602688
RNAscope 2.5 LS Probe Hs-IDO1	C2	602688-C2
RNAscope 2.5 LS Probe Hs-ITGAM	C2	555098-C2
RNAscope 2.5 LS Probe Hs-ITGB4	C2	524538-C2
RNAscope 2.5 LS Probe Hs-MKI67	C2	591778-C2
RNAscope 2.5 LS Probe Hs-MS4A1	C1	426778
RNAscope 2.5 LS Probe Hs-MS4A1	C2	426778-C2
RNAscope 2.5 LS Probe Hs-panCK	C1	404758
RNAscope 2.5 LS Probe Hs-PTPRC	C2	601998-C2
RNAscope 2.5 LS Probe Hs-PTPRC	C3	601998-C3
RNAscope 2.5 LS Probe Hs-S100B	C1	430898
RNAscope 2.5 LS Probe Hs-TIGIT	C1	319798
RNAscope 2.5 LS Probe Hs-TNFRSF9	C1	415178
RNAscope 2.5 LS Probe Hs-UBB	C1	402248
RNAscope 2.5 LS Probe Mm-Aif1	C1	319148
RNAscope 2.5 LS Probe Mm-Cd63	C2	513898-C2
RNAscope 2.5 LS Probe Mm-Enpp2	C2	402448-C2
RNAscope 2.5 LS Probe Mm-Epcam	C2	418158-C2
RNAscope 2.5 LS Probe Mm-Itgam	C1	311498
RNAscope 2.5 LS Probe Mm-Ptprc	C1	318658
RNAscope 2.5 LS Probe Mm-Rac2	C3	466808-C3
RNAscope 2.5 LS Probe Mm-Sparc	C2	466788-C2
